# Supplementary material for: Bioinformatic Analyses of Broad H3K79me2 Domains in Different Leukemia Cell Line Data Sets
Source: MDPI journal article supplement (doi:10.3390/cells11182830), 2022-09-10
Supplement: s1 [file s1]

Supplementary Materials

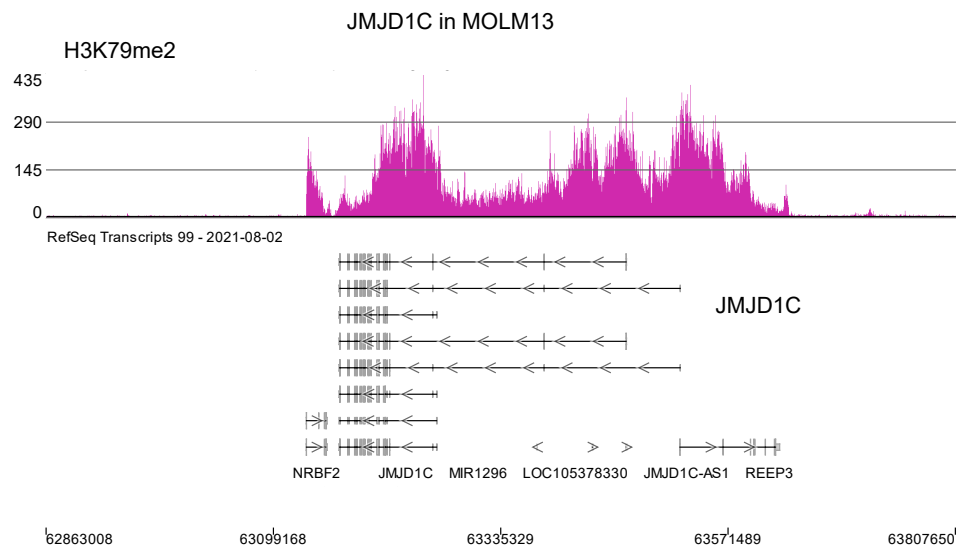

**Figure S1.** H3K79me2 ChIP-Seq track from *JMJD1C* gene in MOLM-13 cells.

Figure S2A

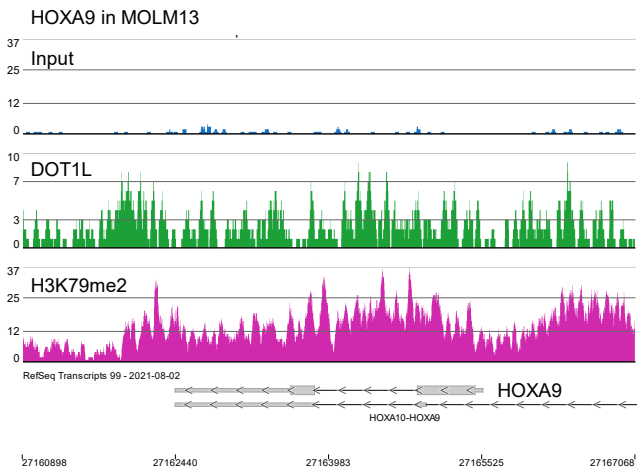

Figure S2B

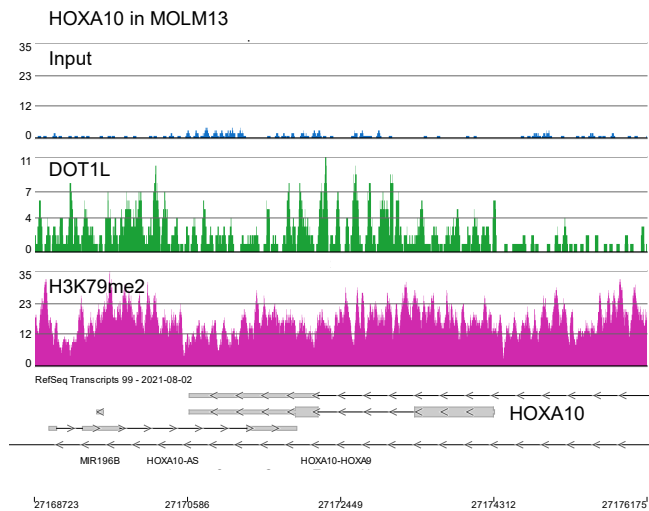

Figure S2C

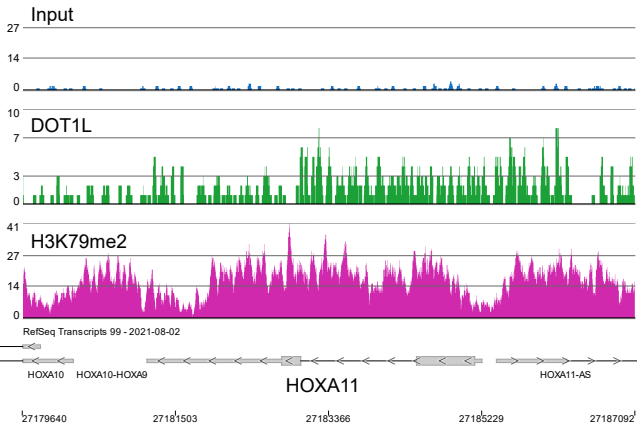

**Figure S2.** H3K79me2 ChIP-Seq tracks for *HOXA9*, *HOXA10* and *HOXA11* genes in MOLM-13 cells.

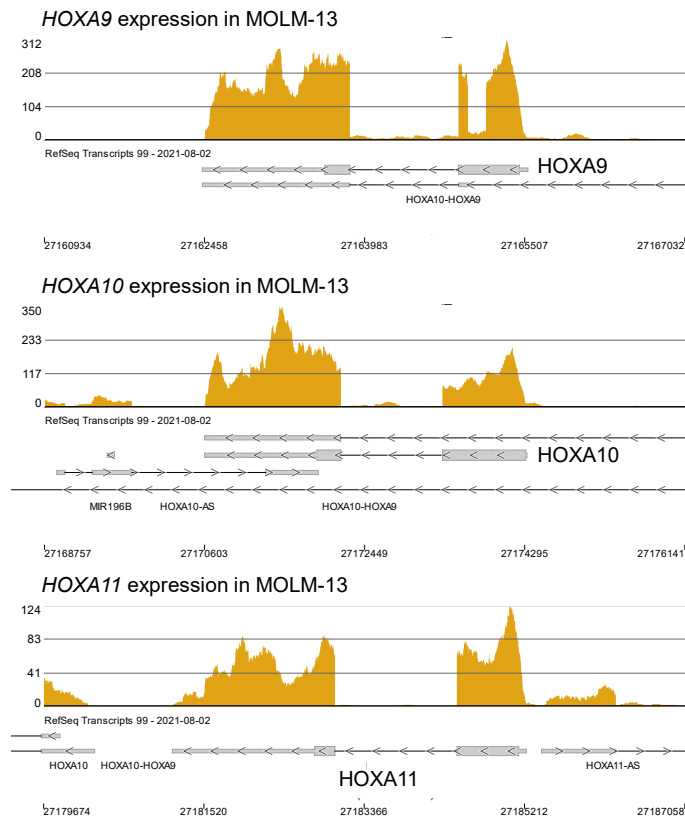

**Figure S3.** RNA-Seq tracks for *HOXA9*, *HOXA10* and *HOXA11* genes in MOLM-13 cells.
