# Supplementary material for: Bioinformatic Analyses of Broad H3K79me2 Domains in Different Leukemia Cell Line Data Sets
Source: MDPI journal article supplement (doi:10.3390/cells11182830), 2022-09-10
Supplement: s1 [file s1]

**Table S2:** Genes in *HOXA9* gene cluster

| Gene                            | TPM  | Functional role                                                                                                                                                                                                                                                                                                                                                                                                   | Reference (PMID)                                                                                  |
|---------------------------------|------|-------------------------------------------------------------------------------------------------------------------------------------------------------------------------------------------------------------------------------------------------------------------------------------------------------------------------------------------------------------------------------------------------------------------|---------------------------------------------------------------------------------------------------|
| <i>HOXA1</i><br>(Homeobox A1)   | 15.2 | <ul style="list-style-type: none"> <li>• Encodes transcription factor which is needed for controlling gene expression, morphogenesis, and differentiation</li> <li>• Play a role in oncogenesis via TNF/NF-<math>\kappa</math>B</li> <li>• Contributes to cancer progression</li> </ul>                                                                                                                           | 27382069,23088713, 22498108, 22864671, 23435427, 26791264, 32561925, 31426381, 16909099, 15084694 |
| <i>HOXA2</i><br>(Homeobox A2)   | 0.79 | <ul style="list-style-type: none"> <li>• Encodes transcription factor which is needed for controlling gene expression, morphogenesis, and differentiation</li> <li>• Involved in homeostasis</li> <li>• Play a part in the embryonic development via Wnt-<math>\beta</math>-catenin</li> <li>• Contributes to cancer progression</li> </ul>                                                                       | 32436804, 32649979, 1358459, 22223247                                                             |
| <i>HOXA3</i><br>(Homeobox A3)   | 0.67 | <ul style="list-style-type: none"> <li>• Encodes transcription factor which is needed for controlling gene expression, morphogenesis, and differentiation</li> <li>• Involved in organ development</li> <li>• Associated with the Colon Cancer progression through EGFR/Ras/Raf/MEK/ERK</li> <li>• Contributes to cancer progression</li> </ul>                                                                   | 15714286, 11784044, 30604847, 29073728                                                            |
| <i>HOXA4</i><br>(Homeobox A4)   | 2.8  | <ul style="list-style-type: none"> <li>• Encodes transcription factor which is needed for controlling gene expression, morphogenesis, and differentiation</li> <li>• Contributes to cancer progression</li> </ul>                                                                                                                                                                                                 | 17785556, 29700285, 16525643, 23980595                                                            |
| <i>HOXA5</i><br>(Homeobox A5)   | 14.5 | <ul style="list-style-type: none"> <li>• Encodes transcription factor which is needed for controlling gene expression, morphogenesis, and differentiation</li> <li>• Play a role in Adipose Differentiation via PKA/HSL pathway</li> <li>• Contributes to cancer progression</li> </ul>                                                                                                                           | 35219772, 33136093, 33223227                                                                      |
| <i>HOXA6</i><br>(Homeobox A6)   | 3.3  | <ul style="list-style-type: none"> <li>• Encodes transcription factor which is needed for controlling gene expression, morphogenesis, and differentiation</li> <li>• Play a role in Renal Cell Carcinoma via PI3K/Akt</li> <li>• Contributes to cancer progression</li> </ul>                                                                                                                                     | 31081053, 19157684, 26870170                                                                      |
| <i>HOXA7</i><br>(Homeobox A7)   | 27.3 | <ul style="list-style-type: none"> <li>• Encodes transcription factor which is needed for controlling gene expression, morphogenesis, and differentiation</li> <li>• Associated with the progression of cancers</li> <li>• Involved in MLL-mediated transformation</li> </ul>                                                                                                                                     | 17959889, 19424076, 11070089, 21626505                                                            |
| <i>HOXA9</i><br>(Homeobox A9)   | 50.5 | <ul style="list-style-type: none"> <li>• Encodes transcription factor which is needed for controlling gene expression, morphogenesis, and differentiation</li> <li>• Play a role in leukemia via Wnt-<math>\beta</math>-catenin and JAK/STAT</li> <li>• Play a part in pyroptosis of human trophoblasts via CMKLR1/AMPK/TXNIP/NLRP3 signaling</li> <li>• Contributes to cancer progression</li> </ul>             | 20339075, 34461109, 29496663                                                                      |
| <i>HOXA10</i><br>(Homeobox A10) | 67.5 | <ul style="list-style-type: none"> <li>• Encodes transcription factor which is needed for controlling gene expression, morphogenesis, and differentiation</li> <li>• Play a role in infertility and viability of the embryo</li> <li>• Associated with the progression of cancers via TGFB2/Smad/METTL3, Wnt/<math>\beta</math>-catenin, PTEN/AKT/PI3K, and NF-<math>\kappa</math>B signaling pathways</li> </ul> | 20821045, 35550944, 33563300 32299243, 25120782, 35553652 34293937, 32571260, 34496932 30614022   |
| <i>HOXA11</i><br>(Homeobox A9)  | 56.3 | <ul style="list-style-type: none"> <li>• Encodes transcription factor which is needed for controlling gene expression, morphogenesis, and differentiation</li> <li>• Play a part in endometrial carcinoma via PTEN/AKT signaling pathway</li> <li>• Involved in uterine development and female fertility</li> <li>• "Double-agent" gene (proto-oncogenes and tumor-suppressor function)</li> </ul>                | 33515421, 20695189, 12050232 29914539, 28423531, 35430506                                         |

|                                                                                |      |                                                                                                                                                                                                                                                                                                                                                                                              |                                                     |
|--------------------------------------------------------------------------------|------|----------------------------------------------------------------------------------------------------------------------------------------------------------------------------------------------------------------------------------------------------------------------------------------------------------------------------------------------------------------------------------------------|-----------------------------------------------------|
| <i>HOXA11-AS</i><br>(HOXA11<br>antisense RNA)                                  | 15.9 | <ul style="list-style-type: none"> <li>• Produces lncRNA</li> <li>• Play a part in embryo implantation, endometrial development, and inflammation</li> <li>• Associated with the progression of cancers via PI3K/AKT, WNT1/<math>\beta</math>-catenin, JAK-STAT</li> </ul>                                                                                                                   | 9745033, 26054679, 30402857,<br>31099097            |
| <i>HOXA13</i><br>(Homeobox A13)                                                | 28.5 | <ul style="list-style-type: none"> <li>• Encodes transcription factor which is needed for controlling gene expression, morphogenesis, and differentiation</li> <li>• Involved in Colon Cancer progression via Wnt/<math>\beta</math>-Catenin</li> <li>• Contributes to cancer progression</li> </ul>                                                                                         | 32822724, 29678634                                  |
| <i>HOXA-AS2</i><br>(HOXA cluster<br>antisense RNA 2)                           | 0.16 | <ul style="list-style-type: none"> <li>• Produces lncRNA</li> <li>• Play a role in acute myeloid leukemia via SOX4/PI3K/AKT</li> <li>• Associated with the progression of cancers via EGFR/Ras/Raf/MEK/ERK, Notch, and NF-<math>\kappa</math>B</li> </ul>                                                                                                                                    | 34076871, 30658190, 32369230<br>30551418            |
| <i>HOXA-AS3</i><br>(HOXA cluster<br>antisense RNA 3)                           | 0.27 | <ul style="list-style-type: none"> <li>• Produces lncRNAs</li> <li>• Control endothelium inflammation via NF-<math>\kappa</math>B, MEK/ERK</li> <li>• Contributes to cancer progression</li> </ul>                                                                                                                                                                                           | 31285272, 30963785                                  |
| <i>HOTTIP</i><br>(HOXA distal<br>transcript<br>antisense RNA)                  | 0.47 | <ul style="list-style-type: none"> <li>• produces lncRNAs ( antisense to the HOXA gene cluster)</li> <li>• Associated with progression of cancers via NF-<math>\kappa</math>B, MEK/ERK, Wnt/<math>\beta</math>-catenin</li> <li>• "Double-agent" gene (proto-oncogenes and tumor-suppressor function)</li> </ul>                                                                             | 35210436, 33000231,<br>32307830, 31002141           |
| <i>HOTAIRM</i><br>(HOXA transcript<br>antisense RNA,<br>myeloid-specific<br>1) | 4.82 | <ul style="list-style-type: none"> <li>• Produces lncRNA, which is specific for maturing myeloid cells</li> <li>• Control the cell cycle progression during the maturation of myeloid leukemia cells</li> <li>• Play a role in leukemia via the Wnt/<math>\beta</math>-catenin</li> <li>• Involved in tumorigenesis via PFKP, NF-<math>\kappa</math>B, JNK/AP-1, and JNK/MAPK/ERK</li> </ul> | 29164055, 31904363,<br>33404645, 31512358, 30551410 |
| <i>HOXA10-AS</i><br>(HOXA10<br>antisense RNA)                                  | 13.6 | <ul style="list-style-type: none"> <li>• Produces lncRNAs (transcribed from the antisense strand of HOXA10 gene</li> <li>• Involved in Lung Adenocarcinoma through the Wnt/<math>\beta</math>-catenin</li> <li>• Contributes to cancer progression</li> </ul>                                                                                                                                | 29729275, 30132568, 31867596                        |
