# Supplementary material for: Bioinformatic Analyses of Broad H3K79me2 Domains in Different Leukemia Cell Line Data Sets
Source: Cells. 2022 Sep 10;11(18):2830. doi: 10.3390/cells11182830 (PMC9496709; doi:10.3390/cells11182830)
Supplement: Supplementary file 1 [file cells-11-02830-s001.zip]

Archive with 4 entries (4 files):
- Supplementary files/Supplementary Materials (Figures).pdf
- Supplementary files/Table S1 H3K79me2 and RNA seq results from MOLM13 DND41 Loucy K562.xlsx
- Supplementary files/Table S2.pdf
- Supplementary files/Table S3 H3K79me2 seq results from MV4-11 and THP-1.xlsx
