# Supplementary material for: Bioinformatic Analyses of Broad H3K79me2 Domains in Different Leukemia Cell Line Data Sets
Source: Cells. 2022 Sep 10;11(18):2830. doi: 10.3390/cells11182830 (PMC9496709; doi:10.3390/cells11182830)
Supplement: Supplementary file 1 [file cells-11-02830-s001.zip › Supplementary files/Table S1 H3K79me2 and RNA seq results from MOLM13 DND41 Loucy K562.xlsx]

## Sheet: Loucy H3K79me2 top 5%
Gene IDs	Length
PTPRC	8467
H3F3A	7674
IFNAR2	7499
SPRY1	7356
ENO1	7284
DNMT1	6774
SMIM3	6597
MALAT1	6585
SRSF10	6505
ATP2A3	6483
HMGCR	6386
HNRNPH3	6331
AC132008.2	6327
AC040970.1	6326
HNRNPU	6233
SPTBN1	6227
UCK2	6225
PKM	6157
CASP10	6116
H3F3A	6077
AC099795.2	5964
TMEM131L	5941
GPBP1	5907
FOSL2	5879
LINC01185	5878
RBM7	5849
AC008622.2	5799
IRF2BP2	5792
INSIG2	5785
PTEN	5732
CRYBB2P1	5716
MYCNOS	5643
SRSF3	5629
FOXK2	5592
KLF13	5557
HNRNPR	5542
HNRNPA3	5538
PDXP	5529
UHRF1	5519
MAPK14	5514
AC004080.2	5480
MYLIP	5451
SNORA70	5451
SLC7A5P1	5446
HDGF	5388
AL138831.1	5376
STK17A	5371
RUNX1	5357
CDKN2C	5301
KIAA0895	5301
PRDX1	5299
TRBJ2-4	5287
MBNL1-AS1	5247
WRNIP1	5223
ELOVL5	5210
UBA2	5193
GON7	5180
MATR3	5178
TDG	5178
AC013394.1	5177
MSL2	5174
TRGC2	5170
ELF1	5134
PLEKHO1	5125
VAV3	5121
PPP4R3B	5108
PI4KAP2	5102
CTNNB1	5100
RSF1	5098
DUSP10	5089
PIP4K2A	5089
BSG	5080
NUP153	5079
MID1IP1	5051
CD69	5026
ZMIZ1	5025
NUCB2	5022
PTMA	5022
MALAT1	5019
KMT2D	5012
AC025181.2	5006
MED13L	4999
WDR82	4994
ARPC2	4990
CDCA4	4980
TFRC	4979
STAM	4978
BIRC6	4976
SPTBN1	4966
AC110285.2	4941
PRELID3B	4920
KPNB1	4910
IGLL1	4907
TAGLN2	4906
AC012531.1	4896
CNOT1	4893
MIRLET7BHG	4888
AL157955.1	4886
SFT2D1	4868
ORAI1	4864
MTF2	4858
CASP10	4849
WDHD1	4841
EIF1AD	4831
SRP72	4830
HCFC1-AS1	4829
AC008124.1	4820
AMPD3	4813
FAM117A	4800
GIGYF1	4789
TRIO	4789
RBBP6	4786
CTDSP2	4781
GMNN	4776
FBL	4773
UBE2L3	4764
POLR3E	4758
AC019131.1	4753
CDC7	4753
AL138724.1	4751
HOXB2	4751
PHF10	4751
RPS15A	4749
FSCN1	4747
GRB2	4744
AC008894.3	4742
RNF38	4738
HOXB2	4733
PHRF1	4731
PPM1K	4712
OIP5-AS1	4708
RGL1	4702
MAP4K4	4698
HNRNPK	4695
EMID1	4687
C12orf65	4683
LINC02470	4681
CD46	4670
AP000547.3	4669
C5orf66	4659
HDAC1	4654
CENPW	4650
FIRRE	4644
STAG3L2	4639
STAG3L3	4623
CCNB1	4617
TUBB	4614
SAP30	4611
RPS6KA3	4609
AL669831.3	4608
LMNB1	4605
PPP1CC	4603
MAPKAPK5-AS1	4602
PRDM2	4602
SDHA	4600
NFATC3	4597
NDUFC2-KCTD14	4596
ZFP36L2	4596
GLUL	4595
RHNO1	4587
SMC3	4586
MAPKAPK2	4583
CHAMP1	4580
HNRNPR	4578
BNIP3P41	4568
CD244	4566
MGEA5	4564
CSNK1D	4553
MAP7D1	4550
NAP1L1	4550
TFRC	4550
PCF11	4546
XPO5	4545
H2AFV	4525
USP10	4525
AL391839.2	4524
STAG3L1	4524
IFI16	4519
KIF22	4519
GLRX	4518
YWHAZ	4517
LDHA	4514
INCENP	4513
HNRNPH1	4508
ZNF121	4502
IPO7	4496
AL121983.1	4495
TRAM2-AS1	4495
VAPA	4495
MYL12A	4493
ZFAND5	4491
SMYD2	4485
AL445471.1	4481
NASP	4481
MORF4L1	4479
HNRNPA1	4477
ABALON	4475
ERG	4470
CNNM3	4467
QRICH1	4467
BNIP3P41	4459
ACLY	4457
RANBP3	4457
EIF3M	4451
PPP2R2A	4448
RUNX1	4448
PPM1D	4447
AC091057.1	4441
DPYSL2	4438
CANX	4432
HOXB-AS3	4432
Y_RNA	4431
RNF220	4425
AC092171.1	4420
ZBED4	4417
SERBP1	4415
AL137779.2	4410
NOL4L	4409
AL355297.2	4403
AC073861.1	4402
NUP43	4398
GMNN	4397
PFKFB4	4395
ATP2B4	4394
AC026310.2	4386
ZCCHC9	4386
MED20	4384
OTUD4	4384
INPP4B	4381
KMT2C	4381
BIRC2	4380
AL158801.2	4379
GOPC	4375
LINC02256	4375
XBP1	4374
CAPZB	4370
TMEM109	4369
PTTG1IP	4367
AC016683.1	4363
PDIA6	4361
ZNF195	4361
FAM46A	4352
AC110285.6	4348
ZBTB45	4348
ELK3	4347
RNF111	4346
CASP8	4344
ING1	4344
DEK	4339
MTF2	4339
RNASEH2B-AS1	4334
EIF4H	4332
MIR181A1HG	4332
RPL3	4332
B2M	4331
AC019322.2	4329
AL031733.2	4329
SMCHD1	4329
HSPD1	4326
UCHL5	4326
SNX8	4317
DZIP3	4315
AL031428.1	4305
RBM26-AS1	4304
AC135983.5	4295
RPS19	4295
TSPYL4	4293
ETFDH	4291
CSF1	4290
MREG	4290
ARHGEF2	4289
BRD2	4280
SAR1A	4279
LDB1	4278
JPT1	4277
BRIX1	4276
IVNS1ABP	4274
PGAM5	4273
RN7SL774P	4269
SAE1	4268
AL358852.1	4267
TMEM259	4267
FAM117A	4266
RPRD2	4266
HACD3	4265
MATR3	4265
TSPAN7	4264
ELMO1	4263
RCC1	4263
ZXDC	4259
CHD2	4256
STIP1	4256
VIM	4256
JMJD1C	4255
AKAP2	4252
LINC01136	4250
GTF2I	4248
HOXB3	4248
FDFT1	4246
P2RX5	4246
SASH3	4246
C12orf75	4243
MIR5690	4239
AC026150.1	4238
PGK1	4236
SNORD12B	4236
HK2	4233
SDE2	4225
RBM4	4223
USP1	4221
AC009961.1	4219
SERBP1	4218
TRBJ2-4	4218
GFPT1	4216
PFKP	4214
PUF60	4209
EPS8	4208
GALNT3	4207
KIFC1	4205
KLHL21	4205
PDP1	4205
SF1	4201
UBE3C	4199
MED22	4198
MKRN3-AS1	4198
ADGRE5	4197
PTPRD	4195
RUNX1	4195
AL135905.2	4194
FLJ37453	4190
LRRC41	4187
CEP55	4186
TRIM8	4185
AC013391.1	4184
WNK1	4184
AC015813.2	4181
RNASEH2B	4181
BCR	4180
MAFK	4178
PPP1R9B	4178
C12orf75	4176
SCFD1	4170
CDK1	4168
RAB27B	4168
PDE7A	4166
GSE1	4165
INSIG1	4165
CSK	4162
SNORD15A	4162
SNORD1B	4161
HNRNPM	4159
TXNL4B	4159
SLC38A2	4158
TET3	4158
LUC7L3	4153
PTPRD-AS1	4148
GATAD2B	4145
UQCRC2	4144
RN7SL681P	4142
ANXA6	4139
PIGN	4139
RERE	4133
IREB2	4131
FKRP	4130
SLAIN2	4125
CSNK1A1	4124
ZNF451	4123
TAF1B	4122
AZIN1	4121
UBP1	4118
IGHVII-28-1	4117
RNF168	4116
ZNF770	4115
CHD4	4109
AC112907.3	4108
GOLGA8M	4107
TLE3	4107
WSB1	4107
KDM2A	4104
SMARCB1	4103
ENTPD4	4102
YBEY	4099
EDF1	4097
ZBTB4	4097
SRRT	4093
AAK1	4092
TBRG4	4091
THAP9	4091
SNORA70	4089
HSH2D	4085
UBXN4	4084
PTBP1	4083
DENND4C	4082
RN7SKP9	4079
ZNF528	4079
E2F1	4078
LINC01185	4077
LASP1	4075
HTRA2	4073
SRSF7	4071
GMFB	4070
SMYD2	4070
WDR33	4068
AC016586.1	4067
RTKN2	4063
SCAI	4063
SLC25A36	4062
NCOA5	4060
TPRA1	4057
SSFA2	4056
DGLUCY	4054
ZNF367	4052
UNC79	4051
DNAJB6	4050
CCNA2	4048
CASP8	4047
TAGLN2	4047
TNRC18	4047
ARMC8	4044
SMIM3	4042
YEATS2	4039
AP000311.1	4038
NACA	4037
KLHL21	4035
RACGAP1	4035
RAP1GAP2	4035
DPF3	4034
SMC6	4034
TSPAN7	4034
CXCR4	4031
SPN	4031
VGLL4	4028
MIB1	4027
CASP8	4025
CNR2	4023
IFT80	4020
PDIA5	4019
U73169.1	4019
SEC31A	4018
RPS7	4017
ARRDC4	4016
NDC1	4015
NCOA4	4014
MAP10	4012
SRSF10	4011
ALG2	4010
AP001453.2	4010
CD44	4009
CDH4	4008
CEP85	4008
H2AFV	4008
RAB33A	4008
KANSL2	4007
MCL1	4007
GCNT1	4005
ABCF1	4003
MEX3C	4003
APBA2	4001
TMEM258	4001
MGAT5	4000
IRX5	3999
MLEC	3999
OSBPL3	3997
METTL18	3995
ARL16	3994
FUS	3994
IQCH-AS1	3993
AL136311.1	3989
PSMB2	3989
CHST11	3988
FBXO46	3988
STX6	3988
AC087164.1	3986
ATP2C1	3986
PRPF38B	3977
SIGIRR	3976
SNHG3	3975
PRC1-AS1	3974
AC010173.1	3972
CSNK1A1	3970
IGFBP2	3968
MCRIP1	3968
Y_RNA	3965
WDR43	3963
AC005785.1	3962
AC016888.1	3962
MAPRE1	3959
BACH1	3958
TGIF1	3958
NAE1	3957
PCED1B-AS1	3957
TBL1XR1	3957
MGLL	3956
LRRC8D	3955
XYLT1	3953
YWHAB	3953
MRPS31P5	3952
THEMIS	3952
UHRF2	3952
C2CD2	3951
SLC16A3	3951
VEGFA	3951
PELI2	3950
DDX17	3948
AL357033.1	3946
NDUFAF6	3946
FUT8-AS1	3945
SERTAD2	3945
RPS9	3943
CNPY3	3941
RNF213	3941
AC020928.1	3940
CXXC5	3940
RAI1-AS1	3938
PIGX	3935
UBE2G1	3935
FBXL14	3933
PSMA2	3933
GTSE1-AS1	3928
RAPGEF1	3928
BORA	3926
COX5A	3926
TNRC18	3926
RAB27A	3925
XRN1	3924
PDCL	3922
SUPT5H	3921
CEP55	3920
HKR1	3919
KMT2A	3918
ZDHHC18	3916
SZRD1	3915
CYTH1	3912
MCL1	3912
ADIPOR2	3911
E2F3	3911
AC123768.3	3909
CNOT6L	3909
DIP2B	3909
UBALD2	3905
ABLIM1	3903
MYCBP2-AS1	3902
HCFC1-AS1	3899
ITK	3899
NOCT	3899
SAP18	3898
IGHVII-43-1	3895
CHMP7	3894
ARHGAP15	3893
FLNA	3893
SRPK1	3893
AP000692.2	3892
MAU2	3892
CCT4	3891
DSCC1	3891
DAB2IP	3889
ILKAP	3889
ADA2	3888
ZNF672	3888
BHLHE40	3886
DNM1P46	3885
PIK3R3	3883
COX19	3882
FCHSD2	3882
AC068446.2	3879
ASF1A	3878
EIF4G2	3877
IRF2BP2	3877
AC104170.1	3874
ITFG2	3874
PCNX4	3874
USP33	3872
CBX4	3870
SCD	3870
MFSD11	3868
IFFO1	3866
RLF	3866
SNORD15A	3866
KANSL1	3864
MSI2	3864
IFNAR1	3863
LARP4B	3861
SCAMP1	3861
AC004080.2	3860
ETFDH	3859
ZNF93	3859
CCNT2	3858
PPRC1	3858
AC091167.7	3857
RPL11P4	3856
ABCC1	3854
TIAL1	3854
AP005329.1	3852
C1orf186	3852
NFIL3	3851
PDAP1	3849
RUNX3	3848
PHIP	3846
CHSY1	3845
ELP4	3844
CD93	3843
MOB1A	3841
SYNCRIP	3841
ECT2	3839
SRF	3839
PPP5D1	3838
MKI67	3836
RYBP	3836
EPB41	3833
ATF4	3832
ERCC5	3832
SNRPA	3832
HDAC9	3830
RRNAD1	3830
AFF1	3829
ZMPSTE24	3828
ANKRD44	3827
IPMK	3827
PMAIP1	3827
P4HA1	3821
SHISA2	3821
LSM14A	3820
AC233280.19	3817
PTBP1	3816
CD244	3815
SEPTiN7	3815
GSE1	3814
HNRNPC	3811
STK10	3811
CEP78	3810
EIF3A	3810
NUFIP2	3807
LCP1	3806
ATL3	3805
EBP	3803
TWF2	3803
FKBP5	3800
SNHG10	3799
RTN4	3797
C2orf76	3796
MIR5088	3796
OGFOD1	3792
SLC3A2	3791
CDK17	3790
TOP2B	3790
C6orf62	3789
AC027237.3	3788
KIAA0895	3787
ZBTB5	3786
NMI	3784
CYFIP2	3783
GTF3A	3782
ILF3	3782
DPYD	3780
STT3B	3780
CARHSP1	3779
ITM2B	3777
EMG1	3776
ACTB	3775
MTHFD1L	3775
PIK3R1	3775
TRIM39	3775
ZSWIM3	3775
RPS10-NUDT3	3773
TTYH3	3773
HERC4	3772
TUBG1	3771
AL117339.5	3769
IL16	3767
AC008622.2	3766
CCND3	3766
C4orf36	3765
DHX36	3765
MAD2L1	3764
RALY	3763
SCAND2P	3763
SETD2	3763
TGOLN2	3763
MLXIP	3762
RAB11A	3760
ZNF395	3760
TAOK3	3759
PGAM1	3757
RPL3	3757
XPO6	3757
LINC01225	3756
MED21	3756
HNRNPA0	3755
IFI16	3755
CPNE1	3754
TNKS2-AS1	3754
NUCB2	3753
NSUN6	3750
PANK2	3750
PKD2	3750
AGPAT5	3748
ATP2C1	3745
ZNF707	3745
CCDC102A	3743
GDE1	3743
DGKZ	3740
METTL4	3740
ST13	3739
AP5Z1	3738
ECHDC1	3737
TOP2A	3737
AC005670.2	3736
BCL6	3736
GFI1B	3736
MIER1	3736
MGME1	3735
TMEM97	3735
AL080276.2	3734
GTF2B	3733
KBTBD2	3732
METTL7A	3732
SMCO1	3731
AC009053.2	3730
LRPPRC	3730
RHEB	3730
TNFRSF1A	3730
TTC41P	3728
AC087241.3	3727
ANKRD13B	3727
LBR	3727
MIR3153	3727
MEF2D	3726
POMP	3726
GALNT2	3725
NOTCH2NL	3725
AC107959.2	3724
RABGGTB	3724
IGFBP2	3723
GAPVD1	3722
SRPK1	3722
SFPQ	3721
CCNB2	3719
FOXK1	3719
SLC38A1	3718
VAV1	3718
ACSS1	3717
LINC00484	3717
CBFA2T3	3716
HOXA-AS3	3716
AL590787.1	3714
ARF6	3714
EFHC1	3714
MRPL20	3711
ZNF747	3711
CPSF4	3710
LINC01221	3710
RN7SL1	3710
AC013394.1	3709
U2AF2	3709
SNRPD3	3708
GIGYF1	3706
AL133342.1	3704
RBM15	3703
USP1	3703
AC103702.2	3701
MAPK1IP1L	3701
RPL32	3701
SMARCA5-AS1	3701
AC018553.2	3700
APOLD1	3700
PPP1CB	3698
NIPAL1	3697
CRTC2	3696
ANKRD12	3694
LAT2	3694
AC090970.2	3693
DDX39A	3693
IMPA1	3692
BAHCC1	3691
MIR5091	3691
STK24	3691
ZYX	3691
CAAP1	3689
PAIP1	3688
SLC1A4	3688
SLC35E1	3688
RPL36AL	3686
MAT2A	3685
PHF3	3685
CD164	3683
ERG	3683
RALY-AS1	3682
AC090181.2	3680
AP005018.1	3680
TBC1D22A	3680
ATP1B1	3679
CLSTN1	3679
ARCN1	3678
DEGS1	3678
DNAJB4	3677
ROCK2	3677
PABPC1	3676
RAC2	3675
RPN1	3675
ZNF410	3673
ARL6IP5	3672
HMGCS1	3672
SEPTIN9	3671
ANXA6	3670
MEMO1	3669
PTRHD1	3668
ABCA11P	3666
UBE2L3	3666
AC026412.1	3665
HDLBP	3665
NFRKB	3665
RNF44	3664
NOLC1	3663
RBM6	3663
RRM2	3663
KDELR2	3662
RTN4	3659
ACACA	3658
BCR	3658
JARID2	3657
MIR4507	3657
ELL	3656
LDHB	3655
TSC22D2	3655
ASXL2	3653
NRDC	3653
CDK12	3652
KDM5B	3652
AC091167.7	3651
CHMP1A	3651
DDX3X	3651
FAM78A	3651
NCOA4	3648
SMC2	3648
TRIM33	3648
FADS1	3647
HPS3	3647
TIMM10B	3647
TRAT1	3646
USP15	3646
IKZF2	3644
PPP4R3A	3644
NCOA6	3643
RNU6-960P	3641
ZNF267	3640
EXOSC7	3636
RANBP9	3635
CCDC57	3634
RBM4	3634
SLC45A3	3634
XIAP	3633
AC009908.1	3631
ARID4A	3631
PTMA	3631
SELL	3631
IGHVII-28-1	3630
TRAM2	3630
GNG2	3629
KIFC1	3628
MLLT11	3628
FBXO36	3627
ITGAE	3627
METTL7A	3626
COX5A	3625
PPP1R15B	3623
AC012360.3	3622
CD3E	3622
GPATCH2L	3621
GRB2	3621
MIR3146	3621
SREK1IP1	3621
SGPP1	3618
SMC5-AS1	3618
HIF1AN	3616
HNRNPF	3616
PML	3616
ZNRF1	3616
TBC1D31	3615
AC136475.1	3614
ARID2	3614
ABRACL	3613
DLGAP5	3613
KHDC4	3612
ATP5C1	3611
NCBP2-AS2	3611
NUMA1	3611
RCBTB2	3610
STK38	3610
ZNF800	3609
UBP1	3608
ZNRD1	3607
RAB8A	3606
NFE2L2	3605
MTG2	3604
P2RX1	3604
MAD2L1	3603
PLEKHJ1	3603
RASSF1-AS1	3603
RIF1	3603
LINC01137	3602
LSM8	3602
NUFIP2	3601
THOC7	3599
BRD3	3598
ZFAND5	3598
CRBN	3597
MLLT11	3596
RBM15	3596
WASHC4	3596
AQP4-AS1	3594
FBXL5	3594
SNX16	3594
C18orf25	3593
RXRA	3592
CHKA	3591
NEAT1_2	3591
PTPRC	3591
HMGB2	3589
PDE4B	3589
UNC50	3589
DNM2	3588
SPN	3587
UGP2	3587
EIF3M	3586
HMGCS1	3586
LYL1	3586
HNRNPL	3585
HNRNPUL1	3585
SMARCD1	3585
AC100797.1	3584
ERG	3583
KIAA1586	3583
HJURP	3582
RPL7L1	3581
FAM117B	3580
AC027682.4	3579
KDM5C	3579
NCOR2	3577
UXS1	3577
AL590133.1	3576
DCUN1D1	3576
EXOC4	3575
SNORA37	3575
TAF1D	3575
AC008115.3	3574
DDX39A	3574
LRP5	3574
S100PBP	3571
TP53	3571
AC025257.1	3570
CLPTM1	3570
RPL21P122	3570
AL442663.3	3569
MDN1	3567
AIP	3566
NUP210	3566
CFL1P1	3564
CKAP2	3564
PRR5L	3564
PABPC4	3563
BARD1	3561
RTN4	3561
RPL39	3560
SUMO2	3560
USP42	3559
ACAD9	3558
MTPN	3558
PRKCB	3557
ACSL4	3556
CD99	3556
EIF2B4	3556
RCE1	3556
CDH4	3555
ATXN2	3554
CD47	3554
CDK13	3554
CHD4	3554
SCMH1	3554
SRRM1	3554
ZMYM6	3554
ARHGAP11B	3553
LINC01336	3553
ARL5A	3552
NBPF25P	3552
COG4	3551
BNIP3L	3550
GRAMD1B	3550
N4BP3	3550
OXLD1	3550
SKA3	3550
SNX10	3550
MAEA	3549
AL442067.1	3548
DLEU1	3548
MCTP2	3548
NADK	3547
AC243547.3	3544
SNRNP70	3544
AC025171.1	3543
INPP5B	3543
SP1	3543
MYL12A	3540
EED	3539
YWHAG	3539
GRB2	3538
MVB12B	3536
PUM1	3536
ATOX1	3535
MRPL13	3535
ZNF253	3535
EMID1	3534
TARBP1	3534
AC009163.3	3533
ROCK1P1	3533
ZNF787	3533
TAF1D	3532
RN7SL174P	3531
TRAF5	3529
ZNF12	3529
AL513550.1	3528
SLC25A42	3524
UTRN	3524
ATL1	3523
ACTG1	3522
IFI27L1	3522
ADAM10	3520
BTG3-AS1	3520
CD38	3520
AHDC1	3519
NT5C3A	3519
CNTRL	3517
SMARCD2	3517
ATP5B	3516
FAM102A	3516
IFNGR2	3515
PSMA6	3515
RPL32	3514
TSC22D3	3514
XPO5	3514
LINC01134	3513
AC233280.1	3512
AHSA2	3512
DGUOK	3512
C17orf62	3511
HJURP	3511
ZNF649	3511
MUL1	3509
DUX4	3507
TFPT	3507
AC012291.1	3506
UBE2D3	3506
ZNF184	3506
RAPGEF6	3505
TPI1P2	3504
AC019129.2	3503
AKAP8L	3503
MED15	3502
CNN2	3501
POU2F1	3501
RCC2	3501
PRCC	3500
PPP4R2	3499
UBASH3B	3498
JAKMIP2	3497
NDUFB4	3497
LARP4	3496
COG6	3495
RTF1	3495
GGA3	3494
RCC1	3494
TM7SF3	3494
DUX4	3493
ARPC2	3492
LMNB1	3492
SLC25A40	3492
RAI1	3491
AC130469.2	3490
IDH1	3490
RIBC1	3490
SMAD2	3490
RPE	3489
CRKL	3488
GRAMD1A	3488
HSPE1	3487
SMARCD2	3487
SPSB1	3487
AC009299.1	3486
ARHGDIB	3486
PHGDH	3485
SNORA38	3485
TMEM199	3485
AC027682.4	3484
CCDC18-AS1	3484
NIPA2	3484
KIF2C	3483
SLC15A4	3483
SNAPC3	3483
UTP11	3483
TNPO1	3482
AC005593.1	3481
UBE3A	3481
USP14	3481
TNFSF4	3480
S100PBP	3479
GLCCI1	3478
TYMSOS	3478
MCTP2	3477
SH3TC1	3477
WIPF1	3477
HDGF	3476
VAV1	3475
AC124283.5	3474
ATF5	3474
NDC1	3474
NLK	3474
TEX9	3474
ZNF394	3474
ESCO1	3473
MRPS30-DT	3473
FNBP1	3471
TLK2	3470
HHEX	3469
MSH6	3468
NRIP1	3468
AC091959.3	3467
LIMD1-AS1	3467
DYRK2	3466
YWHAE	3466
AC007493.2	3464
RPL38	3464
AL133368.1	3463
COG4	3463
ZNF785	3463
MZT2A	3462
NIP7	3462
AC011462.1	3461
ZFP91-CNTF	3461
ZNF644	3461
RRBP1	3460
DYNLL1	3459
IFRD1	3459
COPA	3458
EEF1D	3458
ELOA	3457
PTGER4	3457
MTA2	3456
PPP2CB	3456
TMEM18	3454
LBR	3453
LINC02210	3452
INPP4B	3451
ARHGAP9	3450
H3F3B	3450
JARID2	3450
TRIM25	3450
ATP2A2	3449
LINC01136	3449
UBE2F	3449
ECHDC1	3448
KPNA2	3448
AC020911.1	3447
MOB3A	3447
NAPA	3447
MSL1	3446
VPS13A-AS1	3446
CEP85	3445
ATL2	3442
THEMIS	3442
MIR6516	3441
SNORD17	3441
GFI1B	3440
HELQ	3440
AL158801.2	3439
LIMS1	3439
SNORD1B	3439
ZNRF1	3439
PRKACB	3438
RPSA	3438
HNRNPDL	3436
RIC1	3436
MIRLET7BHG	3435
SH3YL1	3434
AC007786.1	3433
CDK9	3432
SUZ12P1	3432
NBPF26	3431
TAF1D	3431
Y_RNA	3431
ZNF718	3430
DYNC1H1	3429
DUXAP8	3425
NOL8	3425
RECQL	3424
CENPC	3423
AC026771.1	3422
C3orf58	3422
TMEM173	3421
MIR4754	3420
SNORD14C	3420
PDCD4-AS1	3418
USP34	3418
VOPP1	3418
KNTC1	3417
SRRT	3417
PTEN	3416
SRSF5	3415
KAT6A	3414
TBCD	3414
AL137856.1	3413
LAMP5	3412
MAP3K7	3412
BRD2	3411
RPL35A	3410
SINHCAF	3410
SRSF6	3410
TRPS1	3410
SNORD82	3409
CNPY3	3408
RBL2	3408
CDK6	3407
CD82	3406
CDK6	3406
AC092378.1	3405
NCKAP1L	3404
PLEKHG4	3404
AKIRIN2	3403
STAT3	3403
YEATS4	3403
AC139530.2	3402
EXOSC2	3402
LPCAT1	3402
POLR1A	3402
STK11	3402
UBAC2	3402
AC011247.2	3401
IRF3	3401
AC090971.5	3400
BARD1	3400
EEF1E1	3400
GLUL	3400
RRNAD1	3400
YY1	3400
GSK3B	3399
RNPS1	3398
DCAF16	3397
DHX9	3396
ZNF217	3396
SRSF7	3395
CAPRIN1	3394
RASSF5	3394
DNMT3B	3393
IZUMO4	3392
DCAF7	3391
PPP1R37	3391
ARHGDIB	3390
KCMF1	3390
FTX	3389
PLAC8	3389
VCP	3389
PUM2	3388
ATF5	3387
RPS27AP10	3387
RWDD4	3387
ITM2A	3386
SUCO	3386
PPP3R1	3385
AL049650.1	3383
HLTF	3382
MICU2	3382
RAD54L2	3382
B3GNT2	3381
ZNF789	3381
HMGN1	3380
CU633904.1	3379
KLHL15	3379
OSBPL5	3379
PPP4R3A	3379
SNRNP200	3379
PNP	3378
USP11	3378
MRPL21	3377
ATF7IP	3374
ICE2	3373
AANAT	3372
AGO1	3372
SNAPC1	3372
AURKB	3371
FAM111A	3371
FAM83D	3371
PCNA	3371
ARAP2	3370
ZXDC	3369
RPS7	3368
ANKRD40	3367
CDC25A	3367
CFLAR	3367
MOB1A	3367
PANK4	3367
PATZ1	3367
TBC1D20	3367
MVD	3366
NAA16	3366
SNORD82	3366
YIPF2	3366
INPP5K	3365
PELO	3365
PRDX3	3364
CCNL1	3363
RGS6	3363
USP13	3363
ZNF575	3363
NBAT1	3361
CDK6	3359
RPL34-AS1	3359
AMOTL1	3358
SLC25A33	3358
ZNF160	3357
AC018410.1	3356
RORA	3356
RPL11P4	3356
VKORC1	3356
GBF1	3354
SEMA4D	3354
XPR1	3354
GPATCH8	3350
KIAA2013	3349
MIR4515	3348
RRN3P3	3347
GATC	3346
MIR92A1	3346
PDCD6	3346
POLE	3345
SMNDC1	3345
SENCR	3344
AL139011.1	3343
ZBTB8OS	3343
AC034231.1	3342
ARID1A	3342
PREP	3342
SEPTIN9	3342
AC087294.1	3341
TGIF2	3341
TLK1	3341
UBE2V2	3341
LINC00649	3339
LNPEP	3339
WHAMM	3339
ZFP91-CNTF	3339
BTBD2	3338
LONP1	3338
AC005921.3	3335
BICD1	3335
HNRNPA2B1	3334
TRIQK	3334
HBS1L	3333
HMGCS1	3333
AL731569.1	3332
FAM160B1	3332
MSI2	3332
XBP1	3332
ZNF74	3332
FAM83D	3331
GDI2	3331
OGT	3331
AC004471.1	3329
PRKAA1	3329
SIAH1	3329
ZNF618	3329
ZC3H15	3328
PTPRA	3326
AC098818.2	3325
AL078459.1	3325
APTX	3325
NUP160	3324
RANBP9	3322
BUB1	3321
DEF6	3321
GRSF1	3321
SNAP47	3320
UBQLN2	3320
RPS3A	3319
SNORA80B	3319
AC124068.2	3318
OSBPL3	3318
ZNF425	3318
AC091271.1	3317
AC107871.2	3317
RAC2	3315
TMEM258	3315
CYTH1	3314
FBXO7	3314
PLSCR1	3314
CALM2	3313
FASTKD3	3313
POFUT1	3313
CEP85L	3312
E2F8	3312
INO80D	3312
KAT6B	3312
WDR1	3312
ZNF217	3312
AP000345.2	3311
NAA30	3311
AL133338.1	3310
ARHGAP25	3310
SNORD34	3310
SPIN4-AS1	3310
UPF2	3309
WEE1	3309
KAT6B	3308
NDE1	3308
TAF5L	3308
ELMSAN1	3307
GNPTAB	3307
NRROS	3307
PRR11	3307
SNHG17	3307
CLDN5	3306
PCNX1	3306
DDX39B	3304
SDHAP1	3304
ZBTB2	3304
IPO5	3303
ATP13A2	3302
CHAF1A	3302
MRRF	3301
STK17B	3301
AC003991.1	3300
EPB41L2	3300
RAB8B	3300
UBE2J1	3300
YWHAG	3300
ZDHHC6	3300
SENP6	3299
LSM14B	3298
SCAF8	3298
NSA2	3297
ILF2	3296
LRRC27	3296
PBX3	3296
RSL24D1	3296
AKAP11	3294
ERBIN	3294
FUBP1	3294
NDUFB1	3294
AC068987.3	3293
EPC1	3293
RAD51AP1	3292
ZBED6	3292
ELF1	3291
PDS5B	3291
SFT2D2	3291
TRBV5-6	3291
NCOR1	3290
TBPL1	3290
FBRS	3289
ITGA4	3288
PNRC1	3288
SLC37A1	3288
TMEM161B-AS1	3288
UBL3	3288
EIF2A	3287
LARP1	3287
ARID1A	3286
DIDO1	3286
MYO1G	3286
SRRM2	3286
CAMK2G	3285
EIF3E	3285
KIAA1586	3285
PARP1	3285
SIRT1	3285
COX6C	3284
GNB1	3284
EP300	3283
SSBP2	3283
C15orf39	3282
FIP1L1	3282
APBA2	3281
DYRK1A	3281
MZB1	3281
BUB1B	3280
COX4I1	3280
MED1	3280
RAD9B	3280
IGHV1-24	3279
B3GNT2	3278
CCNI	3278
CDNF	3278
CREB1	3278
EGLN2	3277
ELMSAN1	3277
PLCB1	3277
RAF1	3277
AC073578.1	3276
ACVR1B	3275
AGO3	3275
CCNL1	3275
MCCC2	3275
MIR21	3275
XRCC5	3275
SSBP2	3274
SUPT5H	3274
TRBV7-2	3274
ZNF281	3274
C1orf131	3272
PIM1	3271
AKIRIN2	3270
FES	3270
TMED7-TICAM2	3270
EHMT1	3269
UBE2S	3269
UTP23	3269
CAPZB	3268
GRK6	3268
ZNF124	3268
FDPS	3267
MLH1	3267
RNF219	3267
DDX46	3266
SCO1	3266
SNORD65	3266
GCNT1	3265
KDM5B	3265
CLP1	3264
TSC22D4	3264
SLA	3263
AL669831.3	3262
SSBP3	3262
ATXN3	3261
ZAP70	3261
PPP1R15B	3260
TIA1	3260
ZFPM1	3260
AC032019.1	3258
CENPC	3258
HIF1A	3258
U2AF1	3258
ARAP1	3257
FNIP2	3257
LCOR	3257
NTPCR	3257
PIK3R1	3257
CDKN2AIP	3256
PPP1R9B	3256
TTLL11	3256
AC138356.1	3255
ERO1A	3255
SDF2	3255
TPM1-AS	3255
AC112907.3	3254
CBX3	3254
GNPTAB	3253
RBM39	3253
RNF219	3253
PAIP1	3252
WRNIP1	3251
RUNX1	3250
KNTC1	3249
ZHX1	3249
AL157402.2	3248
ZNF773	3248
FP236383.1	3247
NRXN2	3247
SLC2A3	3247
SPC24	3247
TBC1D31	3247
CCND3	3246
GIMAP7	3246
SRF	3246
PPM1D	3245
SP3	3245
AC092755.2	3244
NDUFC1	3244
ZYG11B	3244
AC025257.1	3243
AL135744.1	3243
ARHGDIA	3243
KARS	3243
FAM120C	3242
AC090152.1	3241
KDM4B	3241
UBC	3241

## Sheet: Loucy RNA seq
gene_name	Loucy S1	Loucy S2	Loucy S3
5_8S_rRNA	78.2036	54.015	90.1377
7SK	180.1	211.081	142.967
A1BG	22.733	22.6012	17.2933
A1BG-AS1	1.28078	1.26073	1.22957
A2M	0.138467	0.0654503	0.142344
A2M-AS1	0.28643	0.839392	0.29445
A2ML1-AS2	4.30682	0.525886	2.2137
AAAS	2.08272	2.27863	2.16958
AACS	3.6863	3.47364	4.17868
AACSP1	0.00902362	0.00881466	0.0834863
AAGAB	22.2707	18.5248	19.2029
AAK1	1.71386	1.63271	2.00303
AAMDC	1.45033	1.12082	1.3325
AAMP	353.929	293.347	241.83
AAR2	3.04339	3.51591	3.15716
AARS1	16.4287	14.2082	17.5078
AARS2	10.5836	9.17546	12.7159
AARSD1	30.5154	31.9046	31.7254
AASDH	2.60273	2.22586	2.59483
AASDHPPT	9.91927	12.4377	9.70428
AATF	4.17847	4.02043	4.47496
ABAT	0.12308	0.133112	0.0813381
ABCA1	0.473091	0.436462	0.226282
ABCA11P	0.204094	0.156071	0.146773
ABCA12	0.0256795	0.0228044	0.00719959
ABCA17P	0.044175	0.0593341	0.0397353
ABCA2	0.802427	0.522564	0.847808
ABCA3	0.53661	0.436819	0.651234
ABCA5	0.629556	0.392902	0.539318
ABCA7	1.85241	1.0894	1.69052
ABCB10	0.137713	0.414782	0.165163
ABCB6	1.6243	1.12591	0.969324
ABCB7	2.73089	3.14129	2.69919
ABCB8	1.27346	1.26836	1.46313
ABCB9	0.454197	0.692913	0.489636
ABCC1	0.759579	1.04852	0.494108
ABCC10	0.715231	1.11007	0.538739
ABCC2	0.0621966	0.0337535	0.0710422
ABCC4	0.463457	0.612019	0.617599
ABCC5	3.15697	2.68875	2.8549
ABCC6	0.0522935	0.0510826	0.0940758
ABCD1	0.218641	0.545812	0.299684
ABCD2	0.117792	0.18275	0.0997213
ABCD3	3.35541	3.48963	3.00829
ABCD4	11.4561	12.3767	9.1184
ABCE1	23.4437	25.6977	26.0248
ABCF1	42.6505	39.5935	45.772
ABCF2	9.59378	11.5043	10.7121
ABCF3	4.59843	2.65971	3.66978
ABCG1	3.7414	2.88509	3.86655
ABHD1	0.481788	0.403399	0.495277
ABHD10	24.1737	26.3437	31.9803
ABHD11	6.30803	5.30613	8.1058
ABHD11-AS1	1.72503	1.26382	2.21666
ABHD12	1.1068	1.08117	1.10676
ABHD13	6.58738	7.68606	7.43018
ABHD14A	4.20426	5.07323	4.42366
ABHD14A-ACY1	0.701219	0.574796	0.74872
ABHD14B	5.84021	5.6733	7.63809
ABHD15	8.65619	7.06977	9.62661
ABHD15-AS1	0.134518	0.144358	0.122992
ABHD16A	27.2049	28.9071	32.6025
ABHD17A	43.2776	60.8308	44.4438
ABHD17B	5.96093	7.64437	7.87134
ABHD17C	3.38686	2.74871	1.49214
ABHD18	2.4545	2.17625	2.61643
ABHD2	4.50213	5.08427	3.67659
ABHD3	2.23416	1.85813	1.85397
ABHD4	0.968236	0.409853	1.02852
ABHD5	5.60286	5.04636	4.81662
ABHD6	0.814573	0.600842	0.897192
ABHD8	2.32295	2.45173	2.41543
ABI1	3.71525	4.34449	3.50619
ABI2	6.8213	5.96194	6.51123
ABI3	2.4521	1.84255	2.71465
ABI3BP	0.0138488	0.0193258	0.0264392
ABITRAM	1.50844	2.08025	0.668918
ABL1	1.64966	1.7791	1.9121
ABL2	2.27505	2.38235	2.51252
ABLIM1	1.45342	1.45341	1.58408
ABLIM2	0.0149886	0.00488051	0.00513609
ABR	0.496328	0.464079	0.581083
ABRACL	178.692	189.378	109.855
ABRAXAS1	0.625699	0.990914	0.970624
ABRAXAS2	4.1756	4.02471	4.44938
ABT1	167.615	208.501	87.5317
ABTB1	1.57275	1.41816	1.74116
ABTB2	0.0513742	0.059309	0.0696165
ACAA1	6.90144	5.31577	8.40574
ACAA2	2.74378	3.30652	4.37653
ACACA	0.917777	0.812889	0.826117
ACACB	0.602578	0.545023	0.511292
ACAD10	0.476262	0.338956	0.391677
ACAD11	0.441022	0.375221	0.521619
ACAD8	17.0076	16.2685	11.5078
ACAD9	5.49759	4.29624	4.48764
ACADM	12.8162	14.6117	13.3763
ACADS	24.0786	15.5922	18.5035
ACADSB	2.02937	2.3846	1.9854
ACADVL	24.9973	27.8985	27.6504
ACAP1	15.0701	12.9521	17.5865
ACAP2	0.991009	1.21499	1.21069
ACAP3	1.37564	2.08424	1.70276
ACAT1	10.1039	11.0923	8.63366
ACAT2	79.3014	80.173	78.0497
ACBD3	11.137	9.43077	9.93644
ACBD4	2.254	1.83483	2.83201
ACBD5	1.60389	1.47489	1.54039
ACBD6	0.687274	0.901438	0.932842
ACBD7	62.4744	62.4833	59.7028
ACCS	15.232	12.3264	13.5146
ACD	14.632	13.1497	18.2004
ACE	0.204079	0.243654	0.233103
ACER2	0.033343	0.141141	0.0799786
ACER3	0.664246	0.628944	0.799646
ACIN1	18.4629	16.9138	12.8633
ACKR2	0.482145	0.868193	0.483701
ACKR3	2.92029	2.04225	1.15988
ACLY	30.2793	26.884	34.8509
ACO1	4.20971	4.20647	2.87559
ACO2	15.2722	15.0927	15.9713
ACOT1	0.413509	0.456759	0.133727
ACOT11	0.668286	0.50666	0.481923
ACOT13	2.71716	2.25694	3.18373
ACOT2	88.4191	124.805	92.9913
ACOT7	1.66873	2.04581	1.98409
ACOT8	6.19654	6.08056	5.42501
ACOT9	3.90914	3.98464	3.61598
ACOX1	6.98127	5.65376	6.85838
ACOX3	1.30533	1.38929	1.35523
ACOXL	0.0024915	0.00608451	0.00640314
ACP1	47.0312	53.4207	44.4828
ACP2	21.8944	17.3066	18.4716
ACP3	0.123399	0.0463622	0.0975801
ACP6	2.49568	2.26458	3.20998
ACRV1	5.11714	4.0898	4.62278
ACSBG1	0.328467	0.20951	0.164109
ACSF2	0.76456	0.611064	0.867625
ACSF3	0.204234	0.367836	0.406781
ACSL1	0.237566	0.31163	0.188396
ACSL3	11.7322	11.4539	8.24749
ACSL4	6.6741	5.88354	5.1765
ACSL5	1.70163	1.34892	1.65695
ACSL6	0.82293	0.841793	0.590583
ACSM3	0.249129	0.271472	0.282626
ACSS1	19.3651	16.9734	14.3108
ACSS2	0.588959	0.338424	0.649967
ACTA2	0.058209	0.0316818	0.00886934
ACTA2-AS1	0.184938	0.180656	0.471325
ACTB	496.516	616.453	667.334
ACTG1	1332.76	1208.49	1284.08
ACTG1P17	0.40806	0.181187	0.454809
ACTG1P25	0.358423	0.595209	0.368458
ACTG2	7.33441	10.1469	9.41568
ACTL6A	10.4411	12.5721	8.38272
ACTL8	0.195449	0.118504	0.110853
ACTN1	21.7996	22.334	15.2574
ACTN2	0.043297	0.061092	0.0494547
ACTN4	2.98418	3.6745	3.45448
ACTR10	11.0945	13.5736	10.8041
ACTR1A	5.28053	4.40648	5.28231
ACTR1B	51.9463	43.6358	46.9631
ACTR2	44.8561	54.4431	40.1664
ACTR3	19.7088	23.5421	21.5207
ACTR3B	0.39937	0.503702	0.45101
ACTR3C	0.0666313	0.0650884	0.0498159
ACTR5	5.64593	5.75072	3.80049
ACTR6	3.25732	3.34761	2.76718
ACTR8	15.7333	16.2768	14.1645
ACTRT3	2.74578	1.78813	1.12906
ACVR1	0.238131	0.215761	0.230607
ACVR1B	2.99354	2.38308	1.92745
ACVR2B	1.88435	1.37151	1.94977
ACY1	11.1411	11.6391	12.2325
ACY3	1.30084	1.55952	1.33726
ACYP1	5.26675	4.76692	5.84245
ACYP2	0.202359	0.333221	0.21694
ADA	14.0842	16.4287	18.0789
ADA2	1.71602	2.03292	2.02054
ADAL	15.5766	14.8602	19.7559
ADAM10	4.53761	5.62029	4.02871
ADAM11	0.148042	0.0619772	0.130445
ADAM15	11.205	11.4484	7.28572
ADAM17	0.297223	0.326357	0.314484
ADAM19	0.504248	0.547592	0.54594
ADAM20P1	0.143905	0.0624767	0.0328742
ADAM22	0.482096	0.398887	0.43272
ADAM8	5.92215	5.06596	4.95291
ADAM9	0.453675	0.682134	0.306346
ADAMTS1	4.95708	6.114	1.90452
ADAMTS10	0.364609	0.603934	0.4563
ADAMTS12	0.0104957	0.0166606	0.0040461
ADAMTS13	0.246845	0.0419355	0.209624
ADAMTS17	0.0385937	0.0407802	0.0277464
ADAMTS19	0.0416754	0.0491917	0.0267764
ADAMTS3	0.0318656	0.0360427	0.0534469
ADAMTS6	0.060941	0.056695	0.0581724
ADAMTS7	0.0740068	0.099403	0.0380394
ADAP1	0.302634	0.246355	0.241972
ADAR	25.6852	29.4952	28.2297
ADARB1	0.52552	0.627772	0.523961
ADAT1	6.85848	10.3979	9.56988
ADAT2	3.66085	3.40659	2.55052
ADCK1	0.0286683	0.0770122	0.0957805
ADCK2	16.9185	14.8457	14.3959
ADCK5	2.54417	3.98579	3.79973
ADCY1	0.0227155	0.00633985	0.00333592
ADCY3	6.37281	5.66799	4.4516
ADCY4	0.236989	0.139742	0.385826
ADCY6	0.137853	0.172056	0.145539
ADCY6-DT	3.48049	1.01997	2.14676
ADCY7	0.681044	0.638113	0.705727
ADD1	5.42767	5.45884	6.61753
ADD3	4.02876	4.1356	3.69881
ADD3-AS1	0.0354023	0.013833	0.0582297
ADGRA3	0.559786	0.729098	0.586874
ADGRB2	0.857414	0.57504	0.763019
ADGRE2	1.28846	2.1107	1.41489
ADGRE5	3.04014	3.08122	3.2602
ADGRF3	0.0817401	0.107129	0.0711241
ADGRG1	0.272837	0.16335	0.325714
ADGRG3	0.320736	0.179034	0.188409
ADGRG5	0.739371	0.44298	0.810743
ADGRL1	14.0948	13.0009	13.8008
ADGRL1-AS1	0.31209	0.110719	0.349552
ADH5	38.9465	41.8873	36.9998
ADH5P4	2.18381	3.42103	0.450153
ADI1	44.4919	47.8721	38.5855
ADIPOR1	4.98504	5.85418	5.74068
ADIPOR2	9.36445	9.0674	7.19391
ADK	0.288976	0.328705	0.347765
ADM	21.6249	20.3116	26.7191
ADM5	1.3459	0.328683	1.03768
ADNP	15.3825	15.9259	16.6663
ADNP2	10.108	10.886	7.80624
ADNP-AS1	0.477809	0.866812	0.245593
ADO	40.1153	47.8526	42.9567
ADORA1	0.132273	0.12921	0.0971262
ADORA2A	28.5369	32.5446	21.7418
ADORA3	3.56401	3.36917	1.89099
ADPGK	9.8918	10.8245	10.3413
ADPRM	1.21163	1.31884	1.31673
ADPRS	52.2664	47.4962	54.4199
ADRB1	28.6342	25.0186	26.0017
ADRM1	81.7599	95.5655	101.742
ADSL	13.7222	13.7908	16.9412
ADSS1	0.313963	0.531601	0.387304
ADSS2	9.23098	9.45231	6.99401
AEBP1	15.9444	9.70556	16.0503
AEBP2	0.505178	0.620203	0.604044
AEN	34.4528	46.3398	29.7867
AFAP1L2	0.430964	0.369435	0.248639
AFF1	1.33978	1.06809	0.827335
AFF2	0.877848	0.866012	0.955092
AFF2-IT1	6.50785	3.63266	2.86717
AFF3	0.132253	0.104374	0.149014
AFF4	2.13121	1.97483	1.88675
AFG1L	0.0771649	0.0590801	0.0664618
AFG3L1P	3.12202	3.17747	2.80616
AFG3L2	13.5745	16.6869	13.9476
AFMID	2.63242	2.71046	3.48626
AFTPH	3.67324	3.65692	3.34929
AGA	12.2269	14.0087	11.6745
AGAP1	0.154638	0.128843	0.150396
AGAP10P	1.27384	1.2056	1.12331
AGAP12P	0.866952	0.512932	1.1348
AGAP2	6.49071	5.39064	5.51085
AGAP3	8.81823	7.86463	5.80873
AGAP4	1.20487	1.19722	1.79359
AGAP5	0.593544	0.886348	1.85457
AGAP6	4.26925	4.84537	6.17651
AGAP7P	0.149858	0.167596	0.174568
AGAP9	0.865186	0.997143	0.635662
AGBL2	0.0693117	0.0423167	0.106878
AGBL3	0.0449138	0.0233993	0.0400151
AGBL5	12.0632	14.3279	10.1884
AGBL5-IT1	9.32083	12.14	8.30422
AGER	4.89925	4.082	6.81397
AGFG1	4.5377	5.17492	4.29649
AGFG2	0.26656	0.504501	0.428161
AGGF1	9.3641	9.56723	7.78626
AGGF1P1	2.41168	0.49232	1.93477
AGGF1P2	4.05361	1.90379	2.3432
AGK	0.878489	1.13742	1.08535
AGL	2.97298	3.36572	3.33282
AGMAT	1.37578	2.44027	2.49362
AGO1	4.49805	3.94282	4.87767
AGO2	4.24922	4.02405	3.98947
AGO3	1.5071	1.70202	1.53527
AGO4	1.06623	1.49604	0.827047
AGPAT1	21.6052	17.5813	19.1536
AGPAT2	24.9572	28.437	18.0529
AGPAT3	2.63903	2.7979	2.85506
AGPAT4	0.244916	0.150757	0.237977
AGPAT5	8.65148	9.35343	7.81254
AGPS	2.79337	2.57423	2.80029
AGRN	0.473583	0.587469	0.431619
AGRP	7.42232	7.25044	7.63013
AGT	1.40576	1.50214	1.52837
AGTPBP1	0.709737	0.729537	0.737236
AGTRAP	0.723133	1.18572	1.48676
AHCTF1	4.01775	4.15532	3.59295
AHCY	12.2795	10.1981	12.1033
AHCYL1	47.3154	42.4886	45.9135
AHCYL2	0.0895308	0.0943621	0.138056
AHDC1	5.64497	5.73559	4.76527
AHI1	0.822819	0.678627	0.982251
AHNAK	0.961412	0.873716	1.19491
AHNAK2	0.132889	0.0476724	0.0120827
AHRR	0.118366	0.0900627	0.0845158
AHSA1	79.9135	70.7386	66.9895
AHSA2P	26.9537	25.5615	29.3366
AHSG	0.35121	0.571795	0.361043
AIDA	4.76843	5.10926	5.2994
AIF1	928.865	810.023	1092.22
AIF1L	0.144976	0.0531071	0.0186294
AIFM1	13.3371	13.5323	11.3315
AIFM2	0.0417815	0.0544187	0.0859027
AIG1	0.063755	0.0639619	0.0726254
AIMP1	9.37999	9.74764	11.1814
AIMP2	30.6759	24.2137	36.3392
AIP	9.84511	9.98699	13.2132
AJM1	0.771389	0.430586	0.226567
AJUBA	6.37504	6.80864	7.38364
AK1	2.24654	1.94131	2.30945
AK2	14.2008	15.7013	17.3737
AK3	16.3537	18.7805	18.8309
AK4	8.05761	8.45719	6.46208
AK6	15.4965	18.9346	13.2666
AK9	0.141355	0.135701	0.105226
AKAP1	10.2008	10.9156	10.2808
AKAP10	1.27321	1.23735	1.04708
AKAP11	2.26066	2.41159	2.28506
AKAP13	1.97682	1.99123	2.15909
AKAP17A	34.2753	25.9547	27.1318
AKAP1-DT	0.622094	0.89366	0.902839
AKAP5	9.77081	11.6423	10.2099
AKAP7	0.385266	0.296611	0.38934
AKAP8	10.2793	9.20156	9.87148
AKAP8L	4.01069	3.216	3.64427
AKAP9	4.26698	3.85395	4.95412
AKIP1	26.1553	29.5089	26.9431
AKIRIN1	30.869	35.2012	28.5062
AKIRIN2	2.45482	2.91552	2.99558
AKNA	4.6699	5.3848	6.0792
AKR1A1	20.4451	22.9018	31.1834
AKR1B1	63.0531	68.2886	75.6814
AKR1C3	0.247291	0.221978	0.219861
AKR7A2	41.843	49.4761	53.5251
AKR7A3	0.501366	0.22858	0.250109
AKR7L	2.27047	2.01249	2.23169
AKT1	20.674	21.4776	13.824
AKT1S1	2.00002	2.10399	1.10708
AKT2	48.1774	45.4797	27.6657
AKT3	0.00431715	0.0112763	0.00298601
AKTIP	4.97558	6.57805	3.15308
ALAD	3.67929	3.43646	3.68277
ALAS1	7.44121	8.63544	8.99585
ALCAM	0.165757	0.146177	0.201164
ALDH16A1	14.8075	15.7627	15.3615
ALDH18A1	13.426	13.2825	10.4933
ALDH1A2	0.281481	0.353028	0.29849
ALDH1B1	10.8693	9.03289	13.5918
ALDH2	0.439092	0.456898	0.314007
ALDH3B2	0.0760724	0.0990812	0.130337
ALDH4A1	17.6569	14.23	9.46471
ALDH5A1	22.2762	23.3551	22.5944
ALDH6A1	2.81538	3.33666	2.19312
ALDH7A1	3.58645	2.99556	3.83402
ALDH9A1	12.001	13.8657	13.5631
ALDOA	235.078	301.929	210.687
ALG1	0.611172	0.3877	0.39547
ALG10	7.74927	8.55832	5.49833
ALG10B	0.602637	0.474724	0.231749
ALG11	4.52003	2.68088	3.12706
ALG12	0.465592	0.175981	0.221391
ALG13	1.06028	0.975971	0.985158
ALG13-AS1	0	0.318153	0.781233
ALG14	0.191322	0.210852	0.312668
ALG1L9P	0.0870738	0.0687003	0.0998399
ALG2	35.7456	35.6025	40.7992
ALG3	23.0781	23.6514	27.2897
ALG5	13.0842	15.0023	10.811
ALG6	1.49162	1.497	2.00949
ALG8	5.23527	4.66749	5.97484
ALG9	1.19526	1.21653	1.35658
ALKBH1	0.990768	1.2595	1.10222
ALKBH2	24.1543	29.8407	24.6479
ALKBH3	7.79116	7.71875	5.93138
ALKBH4	10.6505	9.14031	10.8475
ALKBH5	22.1964	23.4744	15.2179
ALKBH6	23.9832	27.4862	19.3161
ALKBH7	36.3182	33.8614	35.9098
ALKBH8	1.0587	1.16907	1.0489
ALMS1	0.935435	0.93696	1.06906
ALMS1-IT1	26.3145	21.0157	14.6223
ALMS1P1	0.160678	0.0251074	0.176148
ALOX12	0.262989	0.289012	0.135176
ALOX12-AS1	0.545767	0.505613	0.52485
ALOX15B	0.239303	0.374019	0.295204
ALOX15P1	0.119061	0.0646133	0.163192
ALOX5AP	7.80921	8.68504	9.7056
ALPK1	0.273855	0.339652	0.414376
ALS2	1.24632	0.963579	1.05654
ALYREF	101.919	118.313	97.6202
AMACR	3.52018	3.20701	3.35949
AMBRA1	0.792235	0.664017	0.585676
AMD1	37.0473	42.1681	44.4514
AMDHD1	0.304649	0.409193	0.293605
AMDHD2	2.81149	3.29031	1.2054
AMER1	2.44162	2.29335	2.9444
AMFR	4.08059	4.01557	2.55877
AMH	6.81887	7.85653	5.2124
AMIGO2	6.70655	11.8811	9.34824
AMIGO3	15.0151	12.8425	11.6921
AMMECR1	1.7913	1.71912	1.83337
AMMECR1L	12.2757	10.7884	11.2744
AMN	1.32643	0.40739	0.59088
AMN1	0.47148	0.624589	0.287432
AMOT	4.7813	3.63818	4.20335
AMOTL1	1.57818	1.52777	1.8237
AMOTL2	0.696358	0.492582	0.518377
AMPD2	21.0376	23.0673	25.7712
AMPD3	0.674454	0.521381	0.526238
AMT	4.74767	4.11046	3.54749
AMY2B	1.37212	1.13686	1.06378
AMZ1	0.0705171	0.0541233	0.108737
AMZ2	6.29764	7.38119	7.76449
AMZ2P1	4.90497	4.53104	6.32842
ANAPC1	1.52514	1.58927	1.65545
ANAPC10	0.202551	0.332974	0.180765
ANAPC10P1	8.92557	5.09618	4.4692
ANAPC11	60.1808	80.776	74.8729
ANAPC13	23.7045	29.7874	27.388
ANAPC15	20.4611	19.5815	25.3397
ANAPC16	16.5033	19.8304	20.6675
ANAPC1P2	1.32562	1.42447	1.29824
ANAPC4	5.61569	5.3024	6.44782
ANAPC5	13.6722	14.2523	15.6627
ANAPC7	11.2114	11.7608	14.6203
ANG	0.228731	0.542628	0.537452
ANGEL1	1.23687	1.37604	1.42315
ANGEL2	3.79633	4.14705	4.616
ANGPT1	1.67063	1.97583	1.31354
ANGPT2	0.341102	0.170304	0.233768
ANK2	0.00854343	0.00752967	0.00702203
ANKAR	0.0333775	0.0326046	0.0285934
ANKDD1A	0.356996	0.301638	0.2387
ANKDD1B	0.0479386	0.0267592	0.0422407
ANKFY1	0.629263	0.704483	0.734818
ANKH	1.72555	1.78175	1.58635
ANKHD1	4.64693	4.39432	5.3016
ANKHD1-EIF4EBP3	0.0753956	0.0714055	0.0744241
ANKIB1	0.945665	0.911612	0.914581
ANKLE1	1.61093	0.55077	0.414008
ANKLE2	10.7121	11.2699	11.1898
ANKMY1	0.281875	0.326093	0.359774
ANKMY2	5.10332	5.20057	5.2786
ANKRA2	3.99071	3.78875	2.88188
ANKRD1	0.32258	0.262592	0.607955
ANKRD10	33.416	30.548	37.3582
ANKRD10-IT1	2.77226	3.02054	2.84988
ANKRD11	2.05145	2.09928	2.5592
ANKRD12	1.87555	2.05601	2.55526
ANKRD13A	10.475	13.9868	16.5979
ANKRD13B	0.677006	0.566854	0.516999
ANKRD13C	0.949348	0.734986	0.861723
ANKRD13D	12.4654	10.601	12.023
ANKRD16	0.666437	1.3187	1.24723
ANKRD17	3.69184	3.44079	4.22671
ANKRD19P	2.91415	2.63403	3.09789
ANKRD20A1	0.129809	0.0958047	0.149201
ANKRD20A11P	0.0545767	0.036488	0.0429276
ANKRD20A2P	0.049331	0.369534	0.515459
ANKRD20A3P	0.416346	0.0822877	0.380897
ANKRD20A4P	0.54869	0.349794	0.27078
ANKRD20A5P	0.757426	0.774664	1.09221
ANKRD20A7P	0.110581	0.0888924	0.115343
ANKRD22	0.196711	0.325187	0.155553
ANKRD23	0.351106	0.411741	0.482259
ANKRD26	0.49984	0.316813	0.643273
ANKRD27	12.9376	12.3591	11.6264
ANKRD28	2.20458	2.56066	2.27662
ANKRD31	0.0200673	0.0252033	0.0265231
ANKRD33B	0.649765	0.639756	0.646751
ANKRD34A	1.97707	2.29915	3.19381
ANKRD35	0.726149	0.538116	0.77222
ANKRD36	2.10105	1.33431	1.85311
ANKRD36B	2.40035	3.10999	5.96746
ANKRD36BP2	0.15548	0.0937712	0.110559
ANKRD36C	2.12489	1.9401	2.86206
ANKRD37	13.3113	11.4613	14.4037
ANKRD39	6.54166	7.75992	5.55564
ANKRD40	10.5831	11.1026	8.4422
ANKRD42	0.530705	0.653665	0.676622
ANKRD44	0.56048	0.672367	0.665701
ANKRD44-IT1	0.074862	0.0457053	0.0288592
ANKRD46	1.40105	1.39692	1.40055
ANKRD49	38.2436	44.526	46.2365
ANKRD49P1	3.38544	1.98423	2.78418
ANKRD50	1.61858	2.15341	2.07222
ANKRD52	7.25936	8.05512	11.3026
ANKRD54	4.91997	4.90831	6.26834
ANKRD6	0.0767908	0.095674	0.0635558
ANKRD63	0.412052	0.805021	0.317692
ANKRD65	0.288621	0.845813	0.890105
ANKRD9	0.182504	0.523961	0.229125
ANKS1A	0.222407	0.231273	0.309762
ANKS1B	0.0596304	0.0629827	0.0362689
ANKS3	0.68937	0.473879	0.538065
ANKS6	0.883844	0.856182	1.10545
ANKZF1	27.3766	23.8965	29.4712
ANLN	2.85661	2.71664	2.45493
ANO10	0.605848	0.539933	0.554923
ANO6	0.511954	0.57813	0.39005
ANO8	3.24443	3.29115	4.48572
ANP32A	37.4431	39.6285	32.3788
ANP32B	182.816	198.817	178.758
ANP32E	120.101	129.86	100.685
ANTKMT	48.8252	52.8633	45.7415
ANTXR1	0.225187	0.249969	0.185194
ANTXR2	2.48283	2.39588	1.63289
ANXA1	4.12238	5.17383	5.68615
ANXA11	5.43696	6.38194	6.56161
ANXA2	4.80383	5.38743	6.91746
ANXA2R	59.1716	45.09	70.7983
ANXA4	0.206408	0.245574	0.176823
ANXA6	19.903	18.0197	22.6111
ANXA7	5.79246	7.16072	5.94188
ANXA9	0.361154	0.211674	0.222759
AOAH	0.0571148	0.0803408	0.0610625
AOC1	0.0524367	0.102445	0.121286
AOC2	1.02558	1.54127	1.54088
AOC3	2.08769	2.24328	2.36076
AOPEP	0.0455999	0.0419237	0.0372255
AP1AR	9.58745	9.47657	9.61345
AP1B1	20.6542	18.9507	19.9024
AP1G1	5.91929	5.65267	6.09121
AP1G2	12.0479	12.6513	14.9228
AP1M1	7.98805	7.79329	7.9532
AP1S1	1.48938	2.05008	1.46149
AP1S2	26.1241	28.8272	29.5531
AP1S3	0.173573	0.10392	0.149653
AP2A1	0.555368	0.62289	0.721977
AP2A2	4.27257	3.62759	3.66392
AP2B1	1.8866	1.81109	2.1739
AP2M1	42.0562	53.4871	52.7468
AP2S1	12.3608	15.4926	16.3821
AP3B1	0.802549	0.906134	0.826103
AP3D1	6.75491	6.43484	10.0443
AP3M1	5.09148	6.18065	6.56726
AP3M2	13.3973	12.5575	13.5336
AP3S1	3.2278	4.11715	3.83924
AP3S2	3.59334	3.48793	3.5077
AP4B1	13.79	13.7281	14.447
AP4E1	1.67074	2.03035	1.5335
AP4M1	20.3338	21.9353	26.6781
AP4S1	0.424587	0.450433	0.510134
AP5B1	28.4778	29.753	25.9053
AP5M1	5.23663	6.03392	5.29991
AP5S1	6.51177	9.48467	6.51478
AP5Z1	22.4953	22.4771	13.0971
APAF1	0.326103	0.336308	0.326254
APBA1	0.191528	0.167805	0.170503
APBA2	0.192274	0.143391	0.180654
APBA3	1.85922	2.07562	3.5495
APBB1	0.119412	0.174971	0.204592
APBB1IP	1.62438	1.5977	1.86563
APBB2	0.0118873	0.0150956	0.00366602
APBB3	3.93343	2.75489	5.11166
APC	1.14987	1.13346	0.934904
APC2	0.0620309	0.0255676	0.171431
APEH	78.1149	79.529	76.2085
APEX1	186.297	193.425	140.865
APEX2	23.9635	19.9869	26.8635
APH1A	348.651	376.272	165.302
APH1B	7.8702	7.73074	6.63455
API5	11.3231	12.5285	11.2162
APIP	4.32358	4.55918	2.1831
APLF	0.079593	0.0451451	0.0923791
APLN	3.04082	1.85042	1.79358
APLP1	0.609686	0.516159	0.292486
APLP2	18.0853	15.837	21.0161
APMAP	24.377	21.9758	31.3572
APOA1	2.58248	2.77495	3.45122
APOBEC2	0.581954	0.491602	0.683837
APOBEC3A	3.3191	3.56348	3.99742
APOBEC3B	6.24594	4.43626	4.00462
APOBEC3C	67.9637	88.8562	90.1665
APOBEC3D	10.3442	9.66419	10.765
APOBEC3F	7.08202	6.51416	8.40369
APOBEC3G	8.5629	9.99602	9.64047
APOBEC3H	0.777008	0.138003	0.363074
APOBR	24.0112	18.2221	30.1982
APOC2	1.91678	2.94234	2.39269
APOE	2.01266	1.96605	3.31041
APOL1	0.167165	0.195953	0.171845
APOL2	2.28602	0.755813	2.2054
APOL3	0.187032	0.219241	0.326856
APOL6	7.04851	8.09199	7.19605
APOLD1	0.224201	0.208731	0.163131
APOM	1.33478	3.0152	1.62943
APOO	0.531495	0.60783	0.932837
APOOL	2.67557	2.60833	2.23372
APPBP2	1.5012	1.71085	1.38772
APPL1	21.3211	20.9119	19.0775
APPL2	0.438045	0.517986	0.48981
APRT	66.2197	78.4956	81.8413
APTR	1.01424	0.892899	0.592112
APTX	2.2789	2.07948	1.98511
AQP10	0.34238	0.557419	0.234644
AQP11	0.299758	0.337865	0.284447
AQP3	12.6846	7.77178	5.86402
AQP4-AS1	0.00271107	0.00264829	0.00464496
AQP5	0.761124	0.619582	1.56487
AQR	4.06962	4.82013	4.94613
ARAF	13.7751	12.3091	11.9787
ARAP1	0.0713368	0.0493586	0.0420331
ARAP1-AS1	88.2304	82.6553	43.2349
ARAP2	0.267586	0.293267	0.28011
ARCN1	15.7286	17.0442	10.3307
AREL1	2.40582	1.96238	2.61474
ARF1	130.952	144.184	135.069
ARF3	44.4077	41.9697	49.1057
ARF4	40.968	45.5744	42.6508
ARF4-AS1	0.569249	0.69508	0.29259
ARF5	1.27403	7.36558e-11	1.18723
ARF6	267.821	317.485	314.222
ARFGAP1	25.4143	20.3272	23.1452
ARFGAP2	12.8042	13.8405	14.9162
ARFGAP3	7.87881	8.4706	6.25202
ARFGEF1	2.29438	2.17995	1.62281
ARFGEF1-DT	1.73743	1.6972	1.33956
ARFGEF2	0.90816	0.837847	0.73909
ARFIP1	1.14817	1.41134	1.46014
ARFIP2	4.69429	7.64263	7.89663
ARFRP1	26.6344	18.0665	20.6013
ARG2	1.10973	1.12777	1.30699
ARGLU1	115.246	118.006	137.822
ARHGAP1	14.2732	15.4072	16.4462
ARHGAP10	0.666883	0.614017	0.700144
ARHGAP11A	31.8058	35.6437	33.4097
ARHGAP11B	3.85342	3.38751	4.24737
ARHGAP12	0.736051	0.432169	0.507122
ARHGAP15	0.392754	0.510622	0.516065
ARHGAP15-AS1	0.160867	0.192062	0.165371
ARHGAP17	0.708002	0.701418	0.691692
ARHGAP18	1.13606	1.18373	0.852725
ARHGAP19	4.22826	4.88987	4.42793
ARHGAP19-SLIT1	0.0117182	0.00338302	0.0414649
ARHGAP21	1.93242	1.92823	2.12436
ARHGAP22	0.0620886	0.0584045	0.0449152
ARHGAP23	1.41752	1.60786	1.47855
ARHGAP24	0.00458221	0.00179044	0.0037684
ARHGAP25	0.784757	0.740926	0.995753
ARHGAP26	0.39212	0.324348	0.373841
ARHGAP27	4.95134	5.72241	5.08994
ARHGAP27P1-BPTFP1-KPNA2P3	2.04519	2.09608	3.52533
ARHGAP30	32.7547	29.9245	38.3336
ARHGAP31	0.264045	0.385028	0.243901
ARHGAP32	1.646	1.72508	1.5561
ARHGAP33	2.16501	2.31315	3.16456
ARHGAP35	1.6374	1.91086	1.75223
ARHGAP39	0.0441567	0.0246481	0.0129694
ARHGAP4	20.0842	21.653	13.5786
ARHGAP44	0.0239154	0.0467232	0.054087
ARHGAP45	30.5857	27.0949	24.7696
ARHGAP5	2.00112	2.44572	2.93588
ARHGAP5-AS1	3.13922	1.78881	3.76497
ARHGAP9	44.7098	37.235	39.5754
ARHGDIA	149.044	194.459	154.056
ARHGDIB	410.529	461.24	468.464
ARHGEF1	2.3463	2.63375	2.14752
ARHGEF10L	0.131422	0.0656821	0.0722636
ARHGEF16	1.11497	1.2677	0.620068
ARHGEF17	2.19124	1.97049	1.39872
ARHGEF18	2.48082	2.9279	2.99676
ARHGEF18-AS1	2.35407	3.03124	1.42999
ARHGEF19	12.4541	10.2534	7.19355
ARHGEF19-AS1	194.485	233.954	136.855
ARHGEF2	6.34202	6.54026	6.18952
ARHGEF26	0.211996	0.138058	0.236093
ARHGEF2-AS2	1.38522	1.24038	1.30533
ARHGEF3	0.719848	0.832008	0.707519
ARHGEF37	0.0407613	0.0113764	0.0179582
ARHGEF38	0.0746271	0.0577117	0.0662017
ARHGEF39	6.21547	6.06569	5.92725
ARHGEF4	0.0965272	0.0763316	0.0803288
ARHGEF40	9.65888	9.77834	9.88497
ARHGEF6	2.76524	3.20052	3.1054
ARHGEF7	2.09883	2.13177	2.7399
ARHGEF9	1.11766	0.964497	0.872198
ARID1A	10.8744	11.834	10.5862
ARID1B	0.752803	0.713647	0.887049
ARID2	1.5723	1.69741	1.63861
ARID3A	13.9175	13.68	10.1953
ARID3B	2.01271	1.90803	2.17382
ARID4A	4.29031	4.2724	5.90698
ARID4B	2.69526	2.72693	3.44077
ARID5A	7.84846	7.57755	9.53798
ARID5B	0.836844	0.909368	0.977353
ARIH1	4.32701	3.90171	3.76029
ARIH2	11.642	11.1978	9.05505
ARIH2OS	4.17559	0.453211	5.72333
ARL1	34.237	36.0217	33.2967
ARL10	2.97673	3.18041	3.93438
ARL11	1.08112	1.49612	1.29662
ARL13B	2.00954	1.45037	1.78948
ARL14EP	14.2922	13.0867	15.0868
ARL15	0.115579	0.111796	0.16075
ARL16	49.4364	51.1857	43.0166
ARL17A	1.4798	1.31236	1.62931
ARL17B	0.527763	0.434296	0.481822
ARL2	20.8436	18.1248	16.5968
ARL2BP	26.1976	30.8135	24.1717
ARL3	3.28103	3.70439	3.47065
ARL4C	58.0225	47.9141	54.1129
ARL4D	28.8487	24.8782	29.6563
ARL5A	8.42756	9.8687	8.64381
ARL5B	19.025	19.4988	16.6934
ARL6	0.474103	0.939114	0.636298
ARL6IP1	40.8074	42.3419	46.0144
ARL6IP1P3	8.63286	5.90307	5.32474
ARL6IP4	180.231	180.476	212.804
ARL6IP5	21.1602	24.5542	22.4104
ARL6IP6	4.4755	6.11211	3.00392
ARL8A	80.7684	68.4474	47.276
ARL8B	5.99119	6.54477	6.53168
ARMC1	18.6619	23.2555	20.1077
ARMC10	9.77413	11.3511	11.4061
ARMC2	0.0191749	0.0149847	0.0157694
ARMC5	37.0813	36.3266	29.6424
ARMC6	3.48969	4.11539	4.777
ARMC7	2.35523	1.78943	2.59236
ARMC8	3.18417	3.48011	2.66516
ARMC9	0.385011	0.309881	0.33447
ARMCX1	7.09915	7.50318	5.86225
ARMCX2	0.317357	1.03336	0
ARMCX3	40.6139	40.3285	39.4862
ARMCX4	0.377776	0.381329	0.375408
ARMCX5	22.8173	26.6592	18.3691
ARMCX5-GPRASP2	0.144364	0.13201	0.148829
ARMCX6	2.61633	2.22088	1.55173
ARMCX7P	189.463	241.179	306.225
ARMH1	4.42598	4.407	4.36441
ARMH3	0.431571	0.385699	0.417696
ARMT1	2.03194	2.85824	2.5066
ARNT	4.69034	4.57474	3.3752
ARNTL2	1.22905	1.79322	1.12905
ARPC1A	4.80266	4.07139	4.78938
ARPC1B	60.2764	47.9189	47.2975
ARPC2	95.5035	120.554	124.976
ARPC3	144.357	159.144	127.783
ARPC4	78.4718	76.881	67.5359
ARPC5	209.326	243.758	221.498
ARPC5L	54.9623	45.3663	42.869
ARPIN	0.134686	0.105253	0.110765
ARPP19	22.1582	26.5287	29.2796
ARPP21	0.114992	0.145725	0.153356
ARRB1	1.6226	1.33746	2.08821
ARRB2	62.2032	59.8545	64.7198
ARRDC1	3.94706	3.41641	2.51672
ARRDC1-AS1	11.3592	10.3035	7.08972
ARRDC2	4.36069	4.80583	3.25672
ARRDC3	9.80903	11.2539	8.93317
ARRDC3-AS1	0.00624551	0.0142354	0.0085605
ARRDC4	0.957235	1.04296	0.416322
ARSA	4.99496	5.40207	5.68496
ARSB	0.548525	0.664692	0.273614
ARSG	0.116628	0.135241	0.166647
ARSK	3.28726	2.5878	1.83874
ARV1	1.53346	2.27949	1.91909
ARVCF	1.24422	1.0667	0.909044
ARX	0.0759708	0.148423	0.156196
AS3MT	0.411317	0.19994	0.330513
ASAH1	13.3664	15.385	13.6036
ASAP1	0.597976	0.578893	0.618096
ASAP1-IT2	1.19015	2.32519	1.22347
ASAP2	0.211916	0.129578	0.193268
ASAP3	0.431597	0.556516	0.479175
ASB1	3.56293	2.61032	2.47426
ASB13	1.16811	1.3284	1.12912
ASB14	0.399111	0.234499	0.184631
ASB16	0.0559667	0.164012	0.345202
ASB16-AS1	2.69677	1.93183	2.86468
ASB3	0.983153	1.19544	1.17608
ASB6	9.77521	9.45745	9.05722
ASB7	1.96869	2.00002	2.09464
ASB8	3.8762	4.52113	5.11473
ASB9	0.549676	0.496677	0.522686
ASCC1	2.36325	2.24614	2.52402
ASCC2	3.19076	3.2119	3.75011
ASCC3	0.395117	0.417604	0.432814
ASCL2	2.0808	0.225847	1.66372
ASCL4	2.98881	2.6763	4.60874
ASDURF	1.13477	0.845231	2.33931
ASF1A	6.39301	8.18447	4.41351
ASF1B	32.3387	48.5445	28.1296
ASGR1	4.72879	2.07868	1.94448
ASH1L	1.42129	1.3946	1.24083
ASH1L-AS1	3.30254	4.96317	3.91731
ASH2L	10.9634	12.5209	9.72728
ASIC1	3.52415	3.56939	5.14822
ASIC3	0.216547	0.423064	0.779133
ASL	6.75353	6.24729	6.78483
ASMTL	1.44736	1.52055	1.79651
ASMTL-AS1	0.293303	0.192596	0.121609
ASNS	0.531943	0.349524	0.375617
ASNSD1	12.911	16.3502	5.65682
ASPH	0.583052	0.508892	0.60366
ASPHD1	0.552449	0.383131	0.113073
ASPHD2	3.70947	3.83262	4.69333
ASPM	11.2333	9.72808	11.2382
ASPN	0.349227	0.0897737	0.245635
ASPRV1	8.45942	12.2423	5.79751
ASPSCR1	1.58368	1.72149	1.70147
ASRGL1	6.45324	5.23609	6.32012
ASTE1	3.48949	2.56908	2.95237
ASTN2	0.0233932	0.0214233	0.0250502
ASXL1	7.25847	6.3149	7.66421
ASXL2	3.52723	3.5369	2.66454
ATAD1	9.50201	7.9101	6.09535
ATAD2	8.0255	7.89355	7.93613
ATAD2B	1.35176	1.38397	1.44809
ATAD3A	24.9523	22.5761	17.0582
ATAD3B	7.1809	5.38117	4.47534
ATAD5	3.5476	3.64982	4.29652
ATAT1	2.68551	1.86705	2.63634
ATE1	0.820003	0.871327	0.700267
ATF1	6.33615	6.09079	6.02914
ATF2	1.49357	1.82251	1.8249
ATF3	1.17712	1.28615	1.3535
ATF4	642.853	561.127	582.873
ATF5	10.1077	11.3898	7.12135
ATF6	3.48719	3.68138	2.79211
ATF6B	8.12972	9.23406	4.66313
ATF7	0.358844	0.470034	0.339547
ATF7IP	7.07958	5.47747	4.62735
ATF7IP2	0.670399	0.805074	0.755555
ATG10	0.618335	0.645094	0.677107
ATG101	1.38885	1.87851	1.09826
ATG12	13.3285	16.3787	13.7016
ATG13	3.10525	3.39604	3.16616
ATG14	1.67034	1.73559	1.74991
ATG16L1	1.81239	1.64909	1.46845
ATG16L2	13.7923	11.2137	7.28529
ATG2A	9.21407	9.29238	5.97259
ATG2B	1.88442	1.73977	1.58282
ATG3	8.11817	8.7136	7.20131
ATG4A	2.64725	2.1587	2.19286
ATG4B	18.7861	16.8046	18.3087
ATG4C	1.17021	1.02126	1.38617
ATG4D	6.61994	4.42396	6.81895
ATG5	0.375897	0.517101	0.428964
ATG7	0.164624	0.305714	0.147171
ATG9A	12.3896	10.367	10.9099
ATG9B	1.06199	1.26793	1.00984
ATIC	23.7644	24.5246	24.8765
ATL1	0.852082	0.924348	1.1229
ATL2	2.75565	2.96953	2.83877
ATL3	10.4905	13.4363	11.4387
ATM	1.25776	1.1575	1.35082
ATMIN	41.0393	36.4372	35.3224
ATN1	1.13693	1.00483	0.222622
ATOH8	1.26776	1.07329	1.25361
ATOX1	7.5355	8.25183	8.63461
ATP10D	0.0268052	0.0305485	0.0413335
ATP11A	0.323714	0.234768	0.252104
ATP11B	0.0113194	0.0203759	0.0193939
ATP11C	0.980435	1.06343	1.15998
ATP12A	0.829229	0.780571	1.10043
ATP13A1	2.27606	1.78891	2.01706
ATP13A2	0.930731	1.05465	1.32037
ATP13A3	5.3017	5.33439	3.01843
ATP13A4	0.0323732	0.00972974	0.00768146
ATP1A1	23.5731	22.1866	17.7969
ATP1A1-AS1	1.43109	1.74914	1.34187
ATP1A3	0.375293	0.366603	0.434026
ATP1B1	4.27147	4.22519	4.58439
ATP1B3	16.8252	17.8689	19.7506
ATP23	1.97527	1.76058	1.937
ATP2A1	0.0561604	0.950074	0.224128
ATP2A1-AS1	62.1714	12.0353	40.3388
ATP2A2	12.1034	12.2998	13.1487
ATP2A3	6.97856	6.08412	4.75
ATP2B1	3.40096	3.44294	3.23798
ATP2B1-AS1	1.99659	2.2104	1.77882
ATP2B4	6.28535	6.53033	8.88919
ATP2C1	3.42118	3.36326	3.55765
ATP2C2	0.0202147	0.0296199	0.0207807
ATP5F1A	58.8056	69.9907	73.2438
ATP5F1AP2	2.88909	4.71723	3.95996
ATP5F1AP3	1.94302	2.83858	1.32883
ATP5F1B	289.945	294.963	334.706
ATP5F1C	39.3014	50.3483	44.7224
ATP5F1D	44.263	34.4985	61.7993
ATP5F1E	201.58	244.061	237.313
ATP5IF1	110.272	110.648	122.287
ATP5MC1	363.625	407.792	376.53
ATP5MC1P4	9.86613	2.1417	4.50771
ATP5MC2	73.538	70.2948	76.8279
ATP5MC2P4	107.047	79.832	166.842
ATP5MC3	1566.39	1471.9	1410.82
ATP5ME	836.512	679.836	1116.66
ATP5MF	20.3344	22.9831	24.8319
ATP5MG	368.676	341.338	237.323
ATP5MGL	11.5012	9.46139	9.33082
ATP5MJ	128.682	169.934	135.328
ATP5MK	127.994	149.998	161.589
ATP5PB	107.254	117.874	116.078
ATP5PD	66.8355	68.7756	63.3221
ATP5PF	53.9098	68.7258	63.5444
ATP5PO	269.636	306.744	271.924
ATP6AP1	86.5204	70.2635	74.6984
ATP6AP1L	0.436156	0.329425	0.536191
ATP6AP2	39.6745	53.2289	41.0387
ATP6V0A1	0.500589	0.377862	0.382055
ATP6V0A2	6.73954	6.49678	6.54723
ATP6V0B	198.246	225.271	210.977
ATP6V0C	155.979	164.274	179.538
ATP6V0D1	3.06854	3.63199	3.67252
ATP6V0D1-DT	3.03816	1.87642	2.39783
ATP6V0E1	6.44587	6.37885	6.39551
ATP6V0E2	11.6343	11.9327	10.734
ATP6V0E2-AS1	2.99916	2.23754	5.58416
ATP6V1A	2.64679	3.2464	3.01132
ATP6V1B1-AS1	0.722879	4.23457e-18	1.10396
ATP6V1B2	26.5379	25.8586	19.7008
ATP6V1C1	1.49712	1.52604	1.93097
ATP6V1C2	0.0712728	0.145582	0.0480082
ATP6V1D	2.5898	2.85232	3.71062
ATP6V1E1	14.6958	13.2462	20.3739
ATP6V1E2	0.774206	0.528483	0.949305
ATP6V1F	214.894	230.438	260.441
ATP6V1FNB	1.31727	0.842017	0.327022
ATP6V1G1	227.58	254.811	181.855
ATP6V1G2	5.3392	5.45263	11.1021
ATP6V1H	0.887455	1.22474	1.14135
ATP7A	0.190364	0.189795	0.177822
ATP7B	0.485275	0.404667	0.468443
ATP8A1	2.80847	2.92768	2.3517
ATP8A2	0.227718	0.217389	0.241694
ATP8B2	7.16344	7.05252	6.78572
ATP8B3	1.24854	0.969447	1.10249
ATP8B5P	0.116037	0.102924	0.119599
ATP9A	4.58477	4.72027	5.59484
ATP9B	0.21121	0.224658	0.22999
ATPAF1	0.35261	0.505186	0.737048
ATPAF2	0.868301	0.794705	0.932819
ATPSCKMT	3.21091	3.69804	3.15818
ATR	1.12543	1.14669	1.22973
ATRAID	66.9048	71.13	64.6303
ATRIP	2.1018	2.81959	2.46885
ATRN	0.770386	0.679128	0.518772
ATRNL1	0.235043	0.274859	0.239881
ATRX	3.464	3.04475	4.00968
ATXN1	0.343985	0.303337	0.321371
ATXN10	4.26021	5.16867	6.24418
ATXN1-AS1	4.78654	2.49371	0.328037
ATXN1L	1.27734	1.43216	1.00909
ATXN2	4.03612	3.43168	4.21271
ATXN2L	41.5216	53.164	6.55331
ATXN3	5.08139	5.75425	5.15966
ATXN7	2.91495	3.26817	2.22794
ATXN7L1	0.126272	0.112924	0.15906
ATXN7L2	2.54006	3.34208	2.82433
ATXN7L3	109.123	100.159	99.0002
ATXN7L3B	44.3204	43.2924	56.0046
AUH	0.231758	0.299729	0.211402
AUNIP	3.47495	4.23454	3.77071
AUP1	137.772	132.308	162.52
AURKA	36.675	35.2293	43.0296
AURKAIP1	261.43	290.405	373.994
AURKB	320.325	299.629	349.873
AURKC	2.74971	2.08914	1.67508
AUTS2	0.674676	0.672481	0.707704
AVEN	0.484839	0.510715	0.599474
AVIL	0.320876	0.349979	0.302752
AVL9	2.36154	2.12494	1.90356
AVPI1	0.590882	0.5772	1.26547
AXIN1	1.59212	1.51908	1.78894
AXIN2	0.219174	0.385378	0.150207
AZI2	4.66481	5.25007	4.79495
AZIN1	9.09033	9.91839	10.6211
AZIN2	0.182478	0.100267	0.0820691
B2M	844.783	961.402	581.788
B3GALNT2	8.68808	6.98159	7.30288
B3GALT2	0.367915	0	0.252144
B3GALT6	54.4624	63.6395	60.5938
B3GAT3	11.1363	11.1538	9.20191
B3GLCT	1.30085	1.40279	1.69412
B3GNT2	29.0568	33.4996	23.3579
B3GNT4	0.71283	0.269394	0.182814
B3GNT5	0.117516	0.0893607	0.0658944
B3GNT7	1.1521	0.865712	1.18436
B3GNTL1	1.61834	0.581417	1.52964
B4GALNT4	1.87721	1.87117	1.02396
B4GALT1	16.801	16.815	10.9723
B4GALT1-AS1	0.0303707	0.148337	0.156105
B4GALT2	40.9187	31.9776	33.1643
B4GALT3	58.7329	50.7068	57.5971
B4GALT4	3.77286	3.13591	3.55529
B4GALT5	2.65213	3.05751	3.25447
B4GALT6	6.15787	7.02525	4.92355
B4GALT7	7.77372	4.95444	5.11643
B4GAT1	69.6445	44.3777	75.78
B9D1	0.110159	0.0753251	0.113242
B9D2	4.71093	5.86129	4.12914
BAALC-AS1	0.126364	0.103948	0.119647
BABAM1	34.6709	39.8923	37.7189
BABAM2	0.156136	0.151468	0.160507
BACE1	0.856123	0.846277	0.948415
BACE1-AS	2.61527	3.0215	1.60355
BACE2	1.82454	1.67528	1.71535
BACH1	0.234701	0.256302	0.195749
BACH1-IT2	2.85881	2.49865	4.02159
BACH2	0.177514	0.136428	0.214687
BAD	4.77753	5.46059	6.5818
BAG1	49.4849	74.3244	53.928
BAG2	14.0084	15.7709	14.6517
BAG3	3.6386	4.19734	2.93223
BAG4	4.26378	4.58516	5.95453
BAG5	66.1136	63.9658	61.705
BAG6	36.1572	36.1832	47.6336
BAHCC1	11.043	9.36808	8.28811
BAHD1	13.5796	16.8588	14.8311
BAIAP2	0.370504	0.37171	0.446785
BAIAP2-DT	6.30355	6.48599	6.48004
BAIAP3	0.224552	0.0750921	0.0742539
BAK1	15.7257	13.0451	15.0113
BAMBI	1.06976	1.13207	1.19135
BANF1	216.567	279.613	312.613
BANK1	0.0422583	0.0391446	0.0531784
BANP	0.845527	0.881255	0.911884
BAP1	31.4201	27.5969	32.2446
BARD1	8.53692	9.42383	10.1183
BATF	7.78185	8.19824	9.49841
BATF3	8.75117	7.84495	9.40347
BAX	2.14585	2.90758	0.85391
BAZ1A	4.28757	4.20376	5.91629
BAZ1B	12.0551	12.6468	15.3303
BAZ2A	4.66466	3.79547	5.62235
BAZ2B	0.903299	0.661747	0.872256
BBC3	19.8315	26.6861	14.645
BBIP1	6.21478	7.64314	6.11796
BBOF1	0.10656	0.133833	0.0547718
BBS1	0.460864	0.137168	0.532941
BBS10	4.53762	2.87516	2.14322
BBS12	0.276455	0.424369	0.284195
BBS2	1.70979	2.06229	2.01548
BBS4	0.499183	0.532774	0.693715
BBS5	1.77892	1.17791	0.786354
BBS9	0.0182638	0.0184561	0.0278391
BBX	3.14132	2.8508	3.51872
BCAN-AS1	6.00174	4.39707	7.40373
BCAP29	3.89878	4.05181	2.71655
BCAP31	30.9456	25.6974	27.7242
BCAR3	0.0237138	0.00661849	0.0208952
BCAS2	18.0006	23.0536	16.9155
BCAS3	0.0155428	0.0204639	0.0382083
BCAS4	0.916556	0.924014	1.0026
BCAT1	15.4162	17.1543	14.6508
BCAT2	3.30004	3.84469	3.11232
BCCIP	18.9886	24.3223	19.0492
BCDIN3D	11.3606	13.5042	5.4172
BCDIN3D-AS1	0.401923	0.392616	0.187807
BCHE	0.0374417	0.109724	0.0769801
BCKDHA	15.4835	16.358	11.7869
BCKDHB	0.179557	0.204961	0.138957
BCKDK	4.91757	5.58076	6.31906
BCL10	10.6867	12.6576	8.42254
BCL11A	4.05084	3.70262	3.8774
BCL11B	6.91491	6.59885	6.04617
BCL2	5.40482	5.44273	4.96772
BCL2A1	2.01727	2.53779	2.17822
BCL2L1	1.13678	1.22943	1.39398
BCL2L11	3.17249	3.31077	2.74477
BCL2L12	71.1797	82.1655	63.0387
BCL2L13	0.725153	0.939852	0.618777
BCL2L15	0.71847	0.833426	1.15404
BCL2L2	1.52917	1.82469	0.421751
BCL2L2-PABPN1	2.60626	5.26691	42.4963
BCL3	3.25167	2.79367	2.09422
BCL6	6.13507	8.12648	8.51115
BCL7A	11.3211	9.79433	11.119
BCL7B	5.12104	8.18987	5.45078
BCL7C	0.868451	1.25305	0.950099
BCL9	0.701912	0.680083	0.833025
BCL9L	1.03098	1.42261	0.950093
BCLAF1	21.173	19.7919	22.8969
BCLAF1P2	7.69899	6.42252	5.18908
BCLAF3	1.95265	1.34014	1.86888
BCO2	0.0884522	0.0672031	0.0606191
BCOR	2.99887	3.18497	2.26827
BCORL1	5.45217	4.70006	3.95179
BCR	3.78828	4.00766	3.98547
BCRP2	0.710576	0.966995	0.776454
BCRP3	0.317252	0.108984	0.0743244
BCS1L	14.4619	14.8334	22.7249
BCYRN1	328.739	391.964	452.248
BDH1	11.0169	10.3307	8.7443
BDH2	4.53005	6.56993	4.50358
BDH2P1	3.43898	1.95839	2.09883
BDNF-AS	0.0505157	0.0542805	0.020772
BDP1	4.77104	3.51542	5.58248
BECN1	19.1747	21.9682	20.007
BEGAIN	0.586665	0.667027	0.642637
BEND3	1.10453	1.51054	1.01698
BEND3P1	0.665426	1.25764	1.03063
BEND4	0.402618	0.359584	0.295636
BEND5	1.58374	1.35607	1.48738
BEND6	0.214149	0.222264	0.151349
BEST1	0.175983	0.300186	0.412492
BET1	1.83522	2.0083	1.3254
BET1L	3.20709	3.38296	4.08663
BEX3	1025.34	1020.55	1175.62
BEX4	298.562	284.805	319.932
BFAR	2.55662	3.25184	2.83352
BFSP1	0.0834447	0.119134	0.0659854
BGLAP	3.83683	2.49865	3.506
BHLHB9	0.176016	0.086247	0.196072
BHLHB9P1	1.46408	0.286036	1.80609
BHLHE40	2.4636	2.24611	2.53257
BHLHE40-AS1	0.0462589	0.0282423	0.023777
BICD1	0.377253	0.307097	0.310611
BICD2	2.38687	2.32277	2.42581
BICDL1	0.184826	0.121869	0.10925
BICRA	0.46777	0.33277	0.402464
BICRAL	1.38747	1.31262	0.780591
BID	11.8025	13.7491	13.0625
BIK	8.36199	8.01894	7.10227
BIN1	2.03126	2.2233	1.86171
BIN2	4.01102	3.80991	4.12334
BIN3	0.348129	0.693624	0.464664
BIRC2	13.6305	14.1105	12.6535
BIRC3	1.34668	1.0174	2.04337
BIRC5	85.8706	93.4089	96.6508
BIRC6	1.54334	1.46612	1.57706
BISPR	1.1697	0.761742	1.6397
BIVM	11.7571	13.4736	10.879
BLACAT1	0.261237	0.149606	0.179034
BLCAP	7.03483	7.76424	7.68025
BLM	2.37786	2.41393	2.62141
BLMH	18.5644	19.0176	13.8257
BLOC1S1	30.754	28.724	36.2191
BLOC1S2	36.6518	37.1774	26.7013
BLOC1S3	1.25454	1.07694	1.28966
BLOC1S4	71.6568	75.3819	52.9974
BLOC1S5	3.51941	4.38271	3.81631
BLOC1S5-TXNDC5	0.0606272	0.0235573	0.0393043
BLOC1S6	20.0565	22.7804	20.5314
BLVRA	4.71889	4.69691	6.09693
BLVRB	1.98748	2.15134	1.76702
BLZF1	3.18109	3.19007	2.55698
BMF	1.05881	1.73132	1.15944
BMI1	91.8844	109.445	97.0409
BMP1	3.05355	2.7426	2.61235
BMP2K	1.49919	1.69513	1.35599
BMP8A	0.252885	0.148217	0.168977
BMPR2	0.646525	0.513135	0.654241
BMS1	23.6276	22.8578	16.5372
BMS1P1	1.8368	1.6077	1.93495
BMS1P10	0.174597	0.0753541	0.10281
BMS1P11	3.19332	2.59003	1.21307
BMS1P13	0.694504	1.22523	0.0719773
BMS1P2	1.51039	1.00444	1.44448
BMS1P22	0.123784	0.151148	0.0954376
BMS1P23	0.191354	0.2921	1.52855e-34
BMS1P4	0.395081	0.301255	0.218778
BMS1P4-AGAP5	0.251217	0.40303	0.429232
BMS1P8	1.4087	1.14157	1.21084
BMT2	1.91808	2.20615	1.39136
BNC2	0.0523951	0.0470873	0.0527848
BNIP1	1.89052	2.20189	1.69429
BNIP2	24.6103	25.7809	28.4883
BNIP3L	4.63791	4.97353	5.99615
BNIP3P29	5.07993	0.82705	2.61108
BNIP3P41	7.04723	3.21256	3.38079
BNIPL	0.339256	0.372826	0.217972
BOD1	9.70437	13.1524	12.7443
BOD1L1	9.35935	8.89444	11.5592
BOLA1	6.17923	5.8898	6.9297
BOLA2	0.265769	0.562111	1.26655
BOLA2B	201.878	182.833	259.119
BOLA2-SMG1P6	12.4639	17.199	14.5491
BOLA3	18.6745	23.3193	18.7263
BOLA3-AS1	4.41051	3.47063	4.15616
BOP1	7.22019	6.29789	7.50688
BORA	13.8053	10.1933	8.48573
BORCS5	0.143987	0.140653	0.11319
BORCS6	86.8929	73.3061	83.6413
BORCS7	16.2607	22.3702	17.2266
BORCS8	6.47093	6.26089	6.58853
BPESC1	0.253388	0.270022	0.236802
BPGM	2.51929	2.23203	2.52959
BPHL	1.38685	1.23527	1.21117
BPNT1	2.77039	4.23834	3.17946
BPNT2	9.72611	10.1054	9.15485
BPTF	9.84581	8.59159	10.2967
BRAF	0.519644	0.454783	0.533854
BRAP	1.88693	1.88635	2.15529
BRAT1	11.488	10.4562	11.3094
BRCA1	2.81732	3.46449	3.81557
BRCA2	3.32574	3.44275	3.68138
BRCC3	6.47605	5.50336	6.95565
BRD1	1.85424	1.57618	1.09054
BRD2	97.87	91.9105	123.318
BRD3	67.7913	58.9346	54.3046
BRD3OS	2.89395	3.23431	3.97553
BRD4	14.1555	13.0148	13.6503
BRD7	44.0071	42.8126	39.9619
BRD7P2	5.51318	5.34111	7.37157
BRD8	8.7474	7.90614	10.6285
BRD9	9.27964	9.05364	9.27061
BRF1	0.877709	0.781864	0.827482
BRF2	41.2764	42.769	40.7222
BRI3	8.18453	9.04423	10.4165
BRI3BP	43.2674	45.2558	38.3967
BRICD5	34.6197	37.6829	28.9178
BRIP1	1.48371	1.60556	1.29619
BRIX1	46.9664	47.9007	44.3191
BRK1	97.3933	104.611	103.141
BRME1	14.821	13.8117	12.1228
BRMS1	17.8041	17.0282	12.308
BRMS1L	0.531473	0.476247	0.519017
BROX	10.8669	11.7415	9.54706
BRPF1	39.884	40.2072	33.0687
BRPF3	2.27994	2.13543	2.37134
BRSK1	0.269538	0.294273	0.211888
BRSK2	0.0398489	0.0519015	0.0546194
BRWD1	4.52014	4.50988	3.99762
BRWD3	0.898863	0.915055	1.00192
BSCL2	4.53879	3.23912	4.30323
BSDC1	6.29616	5.47573	3.71506
BSG	13.3739	17.6252	21.192
BSG-AS1	3.4675	1.59952	4.65386
BSN	0.094976	0.0443715	0.0509401
BST2	46.8715	28.0681	34.1533
BTAF1	1.24313	1.22764	1.39453
BTBD1	2.40626	2.97302	1.66213
BTBD10	2.18958	2.59048	2.02609
BTBD10P1	2.50302	3.49294	3.69617
BTBD11	0.426487	0.435954	0.502478
BTBD19	0.476363	0.66476	0.0699571
BTBD2	2.02413	2.10539	2.12132
BTBD3	3.28442	3.12456	2.86301
BTBD6	58.1413	56.4262	61.1275
BTBD7	6.48689	5.23938	4.97789
BTBD8	0.0740756	0.0361801	0.0951869
BTBD9	0.0953151	0.0820951	0.0853407
BTD	0.799267	0.956429	0.994189
BTF3	255.36	289.884	274.138
BTF3-DT	10.3966	5.71265	12.0236
BTF3L4	20.152	21.3155	14.2968
BTG1	82.6536	100.741	67.6378
BTG2	23.5136	25.9551	32.9947
BTG3	12.7784	13.0944	13.8843
BTG3-AS1	0.203751	0.132984	0.208463
BTK	1.02885	0.845132	0.685069
BTN1A1	3.15194	2.05263	3.78022
BTN2A1	2.91851	3.48167	2.81437
BTN2A2	1.10815	1.60369	1.18137
BTN2A3P	0.483748	0.601423	0.5425
BTN3A1	2.39945	1.67463	3.34053
BTN3A2	15.6116	11.2361	20.2692
BTN3A3	2.38159	1.73955	4.24171
BTRC	0.708674	0.671355	0.845856
BUB1	6.96491	8.27151	6.68173
BUB1B	6.12937	7.44894	6.49944
BUB3	73.3005	69.6943	88.995
BUD13	14.8433	14.9373	9.55179
BUD23	29.6564	32.3193	25.0544
BUD31	23.5963	27.8727	23.6383
BYSL	23.4435	24.5774	18.2041
BZW1	194.786	236.783	147.628
BZW1-AS1	0.245079	0.311549	0.414379
BZW2	7.88451	8.06194	7.24149
C10orf105	0.148045	0.325387	0.171213
C10orf143	0.111801	0.119614	0.114932
C10orf71	0.529134	0.366819	0.456214
C10orf88	1.15641	1.55324	1.86809
C10orf88B	0.459568	0.448926	0.446189
C10orf95-AS1	18.9238	15.2661	20.247
C11orf1	3.845	5.23153	6.07015
C11orf21	8.53283	9.41692	11.8519
C11orf24	6.57342	8.32541	8.15554
C11orf45	3.81015	2.91915	3.53282
C11orf49	0.408221	0.464721	0.589329
C11orf54	4.1541	4.56769	3.17597
C11orf58	9.908	10.0687	8.13183
C11orf68	28.5387	23.2664	36.6169
C11orf71	0.799049	2.13423	2.29851
C11orf80	0.205516	0.36232	0.24047
C11orf95	34.8813	46.6717	31.8861
C11orf96	18.6908	19.1795	18.5706
C11orf98	88.4512	88.7438	101.927
C12orf29	5.75464	6.46811	5.51272
C12orf4	4.32272	4.38074	3.08322
C12orf43	8.72285	9.31694	10.0221
C12orf45	1.58979	1.60672	2.27332
C12orf54	0.13786	0.269335	0.248009
C12orf57	276.877	276.584	316.641
C12orf60	0.0375776	0.0367074	0.0289723
C12orf65	16.0074	16.3312	13.0609
C12orf66	1.11519	1.08936	1.18785
C12orf71	2.22344	1.86168	1.95917
C12orf73	4.94288	5.32668	4.81525
C12orf75	14.6889	15.9349	13.8855
C12orf76	0.640726	0.467957	0.520182
C14orf119	42.2717	37.8598	48.3728
C14orf28	2.66345	1.98681	1.99129
C14orf39	0.508006	0.0541867	0.0848341
C14orf93	1.03567	0.66149	1.18752
C15orf39	7.99977	8.79509	10.1271
C15orf40	3.66732	4.15232	3.55579
C15orf48	0.186112	0.259718	0.109328
C15orf61	40.4835	41.379	36.2148
C15orf62	2.3487	3.44147	3.42048
C16orf46	0.915183	0.695326	0.689924
C16orf54	9.18098	11.2439	13.664
C16orf70	1.4652	1.45574	1.70016
C16orf72	3.57372	4.15784	2.81901
C16orf86	0.74605	1.70047	1.78952
C16orf87	5.67634	5.98193	3.95247
C16orf91	59.1674	78.9426	49.9449
C16orf92	5.66844	4.15341	6.51032
C16orf95	0.250135	0.353388	0.261388
C16orf95-DT	7.22901	3.53081	7.43141
C17orf100	0.174986	0.125352	0.143908
C17orf113	0.742552	0.534474	0.964221
C17orf49	46.4009	44.1146	60.3334
C17orf58	29.3431	42.9954	42.4711
C17orf67	0.649938	0.685276	0.784793
C17orf75	4.98423	6.0807	4.37315
C17orf80	12.5723	15.669	10.4583
C17orf97	0.932472	0.956424	0.838757
C18orf21	11.0302	12.0507	8.50424
C18orf25	2.20404	2.66347	1.7392
C18orf32	2.92094	1.87443	2.77146
C18orf54	5.0091	4.06318	5.74982
C19orf12	5.70845	5.49221	7.07734
C19orf18	0.480497	0.117343	0.710053
C19orf25	8.07652	7.57598	7.20294
C19orf33	13.7634	16.8059	21.1347
C19orf44	0.0774775	0.132446	0.0995624
C19orf47	5.75285	6.43407	4.25118
C19orf48	11.4404	14.0511	13.7552
C19orf53	41.7607	45.2779	59.3886
C19orf54	2.03354	2.9576	2.7873
C1D	3.61435	3.69926	4.19009
C1GALT1	1.74535	2.17881	2.08693
C1GALT1C1	11.697	15.5223	11.5708
C1orf109	3.44021	3.53742	3.9088
C1orf112	0.916465	1.03791	0.994238
C1orf122	68.1425	102.424	54.3943
C1orf131	12.5681	13.7676	14.9449
C1orf159	1.95929	1.09367	1.02146
C1orf162	0.409608	0.800247	0.315807
C1orf174	31.4243	31.5001	20.8686
C1orf198	9.21594	9.7443	8.93826
C1orf21	1.89187	1.72318	1.12748
C1orf216	21.2914	23.904	29.1173
C1orf220	0.235189	0.153876	0.647557
C1orf226	3.51725	3.90971	4.11445
C1orf229	2.14101	1.464	3.08134
C1orf35	70.1535	78.506	74.5573
C1orf43	88.2131	90.2345	90.5413
C1orf50	4.14213	5.19567	4.40458
C1orf52	31.3837	32.066	32.6715
C1orf53	4.48953	6.67802	3.46142
C1orf54	0.190076	0.59416	0.586194
C1orf56	66.365	114.384	58.4968
C1orf74	20.8118	16.5242	17.7544
C1QBP	77.1593	89.9356	78.1624
C1QL3	0.830857	0.463782	0.793111
C1QL4	0.505691	0.197592	0.415879
C1QTNF1	0.30467	0.210081	0.313201
C1QTNF12	0.678195	0.331245	0.929578
C1QTNF3	1.33463	0.819483	1.07799
C1QTNF4	1.73203	3.981	1.57105
C1QTNF6	0.377295	0.515981	0.568859
C1R	1.29419	1.26423	1.85454
C1RL	1.9434	1.58601	1.1033
C1RL-AS1	4.4162	3.88908	3.83039
C20orf194	0.415169	0.390687	0.57115
C20orf197	4.07012	3.69977	4.91048
C20orf203	0.479819	0.323632	0.38255
C20orf204	0.77433	0.840444	0.707564
C20orf27	3.42073	3.83778	5.43143
C20orf96	5.24319	6.21253	5.88903
C21orf58	10.0381	9.08813	9.81572
C21orf62-AS1	0.0369163	0.0386373	0.0515034
C21orf91	17.1198	19.1457	9.47771
C22orf24	0.870193	0.82643	0.720614
C22orf34	0.089519	0.0485811	0.0920253
C22orf39	2.77488	2.6469	3.66241
C22orf46	3.91555	2.70292	3.8105
C2CD2	2.57481	2.82358	2.78393
C2CD2L	10.055	9.64886	10.5798
C2CD3	0.948981	0.808698	0.998795
C2CD4C	1.6972	1.02024	1.20788
C2CD5	1.24432	1.23519	0.517877
C2orf15	0.485236	0.853199	1.69599
C2orf16	0.042654	0.135415	0.109621
C2orf27A	0.591064	0.561561	0.501854
C2orf42	0.166482	0.153061	0.211413
C2orf49	17.7151	15.2429	18.4664
C2orf49-DT	17.8014	16.5676	14.1211
C2orf66	0.489411	0.764925	0.503113
C2orf68	25.2693	26.2012	28.2298
C2orf69	4.05006	5.26798	6.00026
C2orf76	0.254403	0.160802	0.0846112
C2orf81	0.194831	0.444078	0.534095
C2orf88	0.0223901	0.0204135	0.0276203
C2orf92	0.671998	0.571343	0.652434
C3AR1	3.5054	3.52348	3.18574
C3orf18	2.45382	1.56168	2.21676
C3orf33	0.243591	0.23013	0.541455
C3orf35	0.245297	0.167732	0.201732
C3orf38	17.6677	18.8687	16.6797
C3orf56	0.765089	0.280264	0.196627
C3orf62	9.29154	10.6073	13.0617
C3orf86	0.157254	0.110924	0.205499
C4A	0.164077	0.148829	0.156623
C4B	0.164085	0.148836	0.15663
C4orf19	0.0370625	0.0278494	0.0320258
C4orf3	35.6542	35.2405	35.3523
C4orf33	6.1767	6.78283	3.85665
C4orf46	63.4945	63.8007	52.4492
C4orf48	62.8229	86.5387	69.3749
C5	0.0691045	0.0433956	0.0811877
C5AR2	1.88208	2.71101	2.72181
C5orf15	18.1772	20.4108	12.4952
C5orf17	0.0170439	0.014568	0.0197112
C5orf22	15.0764	17.6727	15.302
C5orf24	18.951	20.4272	16.9713
C5orf34	0.679944	0.797039	0.768879
C5orf51	4.95936	4.81745	4.3292
C5orf58	0.288205	0.0938438	0.0987581
C5orf66	0.0926239	0.0626647	0.0954234
C6orf120	6.48218	6.60413	5.57264
C6orf132	0.722213	0.853415	0.634661
C6orf136	8.90033	8.85615	12.3739
C6orf163	0.25751	0.0914717	0.144393
C6orf223	15.8099	11.415	13.9913
C6orf226	27.774	35.6092	16.9525
C6orf47	1.33695	1.30599	0.824629
C6orf47-AS1	22.0485	21.538	29.4661
C6orf52	0.103388	0.0605961	0.0637693
C6orf62	38.9826	44.2589	36.17
C6orf89	7.56975	6.36886	8.12114
C7orf25	1.23247	0.761216	1.15831
C7orf26	7.23636	8.07864	7.57179
C7orf31	0.677547	0.568784	0.696517
C7orf50	3.59991	3.81074	3.74998
C7orf61	0.695962	0.494433	1.23577
C8G	3.77899	1.84574	1.94239
C8orf31	0.292639	0.131937	0.370256
C8orf33	15.6716	14.0468	17.3335
C8orf37	0.796147	1.12768	0.838898
C8orf37-AS1	0.00557694	0.00233477	0.00737111
C8orf44	1.45436	1.57854	1.71657
C8orf58	5.20399	8.71455	8.29748
C8orf76	6.77283	6.72549	6.1111
C8orf82	19.0532	18.3343	18.5635
C8orf88	3.986	5.59232	3.53964
C9orf116	1.91783	2.81013	2.42649
C9orf139	2.94837	2.74509	3.5045
C9orf16	15.9826	15.6065	16.8375
C9orf163	0.563669	2.20247	1.5452
C9orf40	51.3989	60.4295	49.2265
C9orf43	1.55099	1.13029	1.01232
C9orf64	2.95097	3.74236	2.39494
C9orf72	1.1129	1.37126	1.09205
C9orf78	95.6843	96.0574	80.5107
C9orf85	0.849563	0.66518	0.600011
CA11	1.99429	2.69298	2.65311
CA13	0.114222	0.215715	0.109592
CA14	1.29691	1.32721	2.03158
CA5B	0.923263	0.755852	1.01967
CA5BP1	0.251853	0.237373	0.226867
CAAP1	4.37812	4.32205	3.53762
CAB39	2.64871	2.97133	2.00197
CAB39L	0.0749714	0.142983	0.117441
CABCOCO1	0.153639	0.186464	0.071791
CABIN1	2.31563	2.50456	2.35671
CABLES1	1.30851	1.2865	1.41245
CABLES2	6.86779	7.87329	7.37977
CABP4	0.310329	0.353666	0.372187
CABYR	0.271716	0.0208829	0.154823
CACFD1	18.5665	15.8804	14.7485
CACHD1	0.164812	0.158877	0.202865
CACNA1A	0.0453313	0.0321042	0.0302903
CACNA1C	0.0385766	0.0311722	0.0371557
CACNA1C-AS1	0.222637	0.0621376	0.457741
CACNA1C-AS2	7.79194	4.94963	4.80815
CACNA1D	0.0146238	0.02154	0.0139846
CACNA1G	0.16731	0.156398	0.171037
CACNA1G-AS1	0.245734	0.240044	0.336818
CACNA2D2	0.00682671	0.0100029	0.0175446
CACNA2D4	1.36595	1.08833	1.36889
CACNB1	1.72357	1.37821	1.6423
CACNB2	0.117522	0.101915	0.143002
CACNB3	9.54243	6.23509	13.7138
CACNB4	0.101625	0.113454	0.0746218
CACTIN	7.2347	9.0238	7.03775
CACUL1	10.8156	8.78295	8.18864
CACYBP	146.25	144.774	141.383
CACYBPP2	6.47962	7.67798	5.9111
CAD	23.1031	25.3934	26.7046
CADM4	0.580692	0.837363	0.966491
CALCOCO1	0.377118	0.24559	0.594437
CALCOCO2	10.5389	9.94901	10.778
CALHM2	10.7584	11.887	9.64399
CALHM6	28.3785	27.7213	23.5867
CALM1	227.731	223.743	261.259
CALM2	229.12	240.602	179.445
CALM3	107.805	114.032	129.057
CALML4	3.28315	2.97331	3.90945
CALR	128.08	113.294	128.599
CALR4P	0.0878131	0.0857797	0.0150453
CALU	21.1893	21.3629	25.0174
CAMK1	0.961117	0.858823	0.347946
CAMK1D	0.89427	0.961984	0.958164
CAMK2B	0.0699874	0.0603236	0.0380895
CAMK2D	0.132151	0.148317	0.145968
CAMK2G	3.02097	3.62031	3.54576
CAMK2N1	27.8421	26.8265	30.9634
CAMK2N2	24.7812	22.7953	24.2013
CAMK4	0.536494	0.515366	0.564341
CAMKK1	0.713059	0.423392	0.589293
CAMKK2	2.65504	2.63249	2.80315
CAMKMT	0.0871178	0.0828005	0.0484091
CAMLG	12.4549	11.5443	10.1119
CAMSAP1	3.26979	2.90803	2.68907
CAMSAP2	0.211498	0.194906	0.217419
CAMTA1	0.351189	0.376164	0.375666
CAMTA1-DT	4.06252	2.97634	5.74236
CAMTA1-IT1	2.54634	0.355339	1.86973
CAMTA2	1.69342	0.89638	1.7238
CAND1	17.6193	18.546	18.8492
CAND2	0.0341609	0.00680302	0.027066
CANT1	16.0329	15.4016	17.4949
CANX	19.1136	18.0921	19.4895
CAP1	34.286	40.6733	47.9544
CAPG	18.2718	25.5067	26.7587
CAPN1	7.01152	5.242	8.21944
CAPN10	3.1374	3.72039	3.03269
CAPN10-DT	1.45032	0.944491	2.73337
CAPN12	116.568	114.965	62.3549
CAPN15	2.80099	3.45524	4.78056
CAPN2	1.26664	1.43401	1.70988
CAPN3	0.345775	0.405993	0.309562
CAPN5	0.228674	0.343045	0.293845
CAPN7	3.29771	3.67577	2.86931
CAPNS1	111.458	96.7115	104.737
CAPRIN1	18.8321	19.0643	18.0017
CAPRIN2	2.58758	1.74752	3.27304
CAPS	2.87093	3.29218	4.36281
CAPZA1	24.9031	27.6901	30.0993
CAPZA2	2.86632	3.65524	2.7361
CAPZB	36.732	31.6875	20.4967
CARD11	0.379097	0.284597	0.34641
CARD16	0.265423	0.282699	0.305928
CARD19	12.7184	17.9026	16.7434
CARD6	0.153733	0.275318	0.131698
CARD8	5.13884	4.88693	4.46266
CARD8-AS1	20.4647	23.5614	16.3241
CARD9	0.318122	0.334665	0.811242
CARF	0.483123	0.447096	0.339812
CARHSP1	25.1179	25.9172	22.3567
CARM1	0.171874	0.00916572	1.02154e-10
CARMIL1	0.110435	0.139688	0.101883
CARMIL2	2.61278	2.62734	2.80442
CARMIL3	0.109123	0.186542	0.2524
CARMN	0.258851	0.162551	0.247091
CARNMT1	2.98382	3.01387	3.29689
CARNMT1-AS1	0.055791	0.0217996	0.0344118
CARNS1	0.0454361	0.22192	0.373666
CARS1	5.96922	5.95595	6.06622
CARS2	4.44654	4.20621	5.17686
CASC15	0.244095	0.248457	0.284553
CASC3	40.6732	35.9365	32.7944
CASD1	3.08465	3.38864	2.75514
CASK	0.242536	0.225363	0.227434
CASKIN2	2.13271	1.10456	2.84908
CASP1	0.591485	0.96389	0.253352
CASP10	8.01422	8.16371	7.83252
CASP2	80.4747	71.1459	73.2389
CASP3	11.9453	18.7912	11.8014
CASP4	3.75793	3.92038	5.32588
CASP4LP	1.21377	0.943144	0.907459
CASP6	18.8861	21.0804	17.1163
CASP7	5.82977	6.29709	6.36755
CASP8	10.2178	10.2073	5.49459
CASP8AP2	3.28856	3.43506	3.89386
CASP9	1.44885	1.45497	1.04398
CASS4	0.350493	0.616279	0.236773
CAST	0.699184	0.749319	0.744423
CASTOR1	10.1924	9.01312	9.4851
CASTOR2	1.84481	1.91516	1.59154
CASTOR3	4.07337	3.04154	3.48511
CASZ1	1.30964	0.921366	0.99388
CAT	27.0856	31.0915	30.4993
CATIP	0.300995	0.445455	0.309422
CATSPER2	1.27041	0.806911	1.43279
CATSPER2P1	0.332929	0.615776	0.339561
CATSPER3	0.0441599	0.0431373	0.0453963
CAV1	0.146959	0.182707	0.0549357
CAVIN1	0.1394	0.158868	0.0716516
CAVIN4	2.34429	3.16021	2.21713
CBARP	1.10459	0.873354	0.881735
CBFA2T2	0.607467	0.534355	0.680397
CBFA2T3	1.94132	1.70258	1.71404
CBFB	9.05501	11.951	10.1981
CBL	5.94395	5.58124	4.76988
CBLB	0.399683	0.405868	0.313378
CBLL1	12.8779	11.7002	11.5837
CBLN3	0.438495	0.428341	0.225386
CBR3	1.50136	0.00236356	4.89076
CBR3-AS1	2.22792	2.12911	1.64534
CBR4	4.9464	4.44611	3.81059
CBWD1	2.43062	3.92381	3.15395
CBWD2	8.46367	8.51626	9.53869
CBWD3	1.32898	1.27718	0.810016
CBWD5	3.5956	3.53879	2.90408
CBWD6	0.162352	0.158051	0.523315
CBX1	37.6418	42.9164	40.6249
CBX1P1	9.09356	3.3298	3.51005
CBX2	117.518	101.641	91.3513
CBX3	500.026	535.956	466.137
CBX3P2	1.94815	1.02471	0.462159
CBX3P9	8.76565	11.9805	9.90976
CBX4	77.612	99.258	102.716
CBX5	12.7366	10.7137	13.8913
CBX6	139.701	131.93	124.978
CBX7	1.7099	1.8446	1.13109
CBX8	21.2568	17.6004	15.7126
CBY1	1.2915	1.08438	1.54285
CC2D1A	4.36838	3.90365	5.13508
CC2D1B	6.45471	6.24432	2.49003
CC2D2A	0.0513955	0.0502053	0.0452866
CC2D2B	0.0306598	0.056156	0.0196989
CCAR1	25.3888	29.4856	32.6249
CCAR2	13.2338	13.1306	13.1121
CCDC102A	4.53888	5.28568	4.4622
CCDC102B	0.036971	0.0263917	0.032159
CCDC106	1.87783	2.61492	1.97147
CCDC107	23.6376	12.4216	20.2588
CCDC112	2.57254	2.80108	2.34137
CCDC113	0.0550615	0.0338559	0.0356238
CCDC115	97.6624	107.089	109.048
CCDC117	29.5683	28.6846	27.0784
CCDC12	5.35684	6.03181	5.276
CCDC120	2.43412	2.63873	3.84496
CCDC121	2.00538	1.53917	1.76702
CCDC122	0.103906	0.177625	0.151322
CCDC124	2.9948	4.17307	5.614
CCDC125	0.707227	0.86132	0.896982
CCDC126	0.93977	1.04773	0.640554
CCDC127	8.67316	7.58752	7.34487
CCDC130	1.97748	2.12636	2.23771
CCDC134	1.54779	1.59268	1.85062
CCDC136	6.96439	5.8248	7.53954
CCDC137	33.1152	36.4331	29.8825
CCDC138	1.30261	1.32985	1.21323
CCDC13-AS1	0.170297	0.0998124	0.175065
CCDC14	7.91105	6.52708	7.93869
CCDC141	0.0460775	0.0676238	0.0428563
CCDC142	6.17872	6.07459	7.00456
CCDC144A	0.0357562	0.0215725	0.0866254
CCDC144CP	0.114214	0.097232	0.110803
CCDC146	0.133057	0.202945	0.280764
CCDC15	1.54933	1.47021	1.83731
CCDC150	1.13157	0.965805	1.17528
CCDC157	0.65807	0.66426	0.608845
CCDC159	0.141343	0.184093	0.242167
CCDC15-DT	4.49479	4.098	4.72332
CCDC162P	0.0357663	0.0324425	0.00787879
CCDC163	3.81213	2.73589	3.51898
CCDC167	14.2842	15.6802	15.0066
CCDC168	0.797434	0.349741	0.619003
CCDC169	0.102001	0.0373647	0.117964
CCDC17	0.84307	1.1765	0.619053
CCDC171	0.264237	0.193124	0.242322
CCDC174	8.39097	7.51927	9.5289
CCDC175	8.88304e-10	2.4529e-05	0.122801
CCDC18	1.66835	1.62972	2.25322
CCDC180	0.0934663	0.145411	0.233654
CCDC181	0.220414	0.193779	0.158609
CCDC183	0.890236	0.662568	0.91516
CCDC186	4.42942	4.22068	4.48825
CCDC189	1.55478	3.24689	1.5567
CCDC18-AS1	0.368073	0.287268	0.45643
CCDC191	0.04183	0.0766152	0.0806272
CCDC200	0.120236	0.0587257	0.061801
CCDC22	2.0928	1.42818	2.0472
CCDC24	1.77667	1.09612	1.4419
CCDC25	16.1851	18.9077	12.2544
CCDC28A	8.25886	7.68115	6.91409
CCDC28A-AS1	0.0399191	0.0779895	0.0307776
CCDC28B	44.3742	56.1719	45.2012
CCDC30	0.084809	0.109011	0.143479
CCDC32	2.51693	2.03397	2.98659
CCDC33	0.130105	0.074137	0.126316
CCDC34	34.0114	34.885	36.6506
CCDC40	0.105782	0.110714	0.194186
CCDC43	15.9589	16.0514	15.2832
CCDC47	8.76144	10.3909	9.86804
CCDC51	22.6184	24.6573	22.2329
CCDC57	2.09959	1.79842	1.56241
CCDC59	2.61884	3.1489	3.19241
CCDC6	3.59472	3.8963	3.48444
CCDC61	0.448703	0.620943	0.461266
CCDC62	0.164178	0.106917	0.0937637
CCDC65	0.087166	0.0170295	0.107528
CCDC66	1.29536	1.06861	1.74791
CCDC68	0.0667355	0.0244463	0.0857549
CCDC69	8.26661	7.32913	7.63208
CCDC7	0.0782589	0.0605533	0.0773795
CCDC71	22.6633	35.322	16.099
CCDC71L	20.407	33.6872	23.9022
CCDC74BP1	0.531901	1.8142	0.0145447
CCDC77	4.40232	4.21191	3.93893
CCDC80	0.100843	0.035821	0.0376968
CCDC81	0.0799504	0.136673	0.102736
CCDC82	3.85888	4.16387	5.5903
CCDC85B	10.5423	7.84624	8.25712
CCDC85C	0.126529	0.110006	0.128258
CCDC86	1.06776	0.776279	1.49462
CCDC88A	9.0582	7.61076	9.45783
CCDC88B	10.572	7.24814	9.74968
CCDC88C	2.91009	3.29072	3.41556
CCDC9	1.173	1.35902	1.23389
CCDC90B	5.95593	6.19524	5.52828
CCDC91	0.566164	0.602603	0.741701
CCDC92	1.17799	1.28148	1.17428
CCDC93	5.8508	6.26111	4.80054
CCDC97	6.74094	8.09454	7.03108
CCDC9B	0.71124	1.09178	1.30563
CCHCR1	5.53815	4.99146	4.24631
CCL28	1.62287	1.74382	1.6127
CCL3	1.26291	3.70098	1.03861
CCM2	3.32182	3.92735	3.34351
CCM2L	0.244577	0.282353	0.388566
CCN1	13.2571	13.8134	7.39818
CCNA1	0.511081	0.665662	1.13835
CCNA2	98.8097	111.66	97.1956
CCNB1	45.8161	50.7053	49.9167
CCNB1IP1	7.09354	8.93062	8.22064
CCNB2	45.0926	46.5839	42.1627
CCNB3	0.132847	0.123441	0.0965958
CCND1	1.85276	1.20236	2.29055
CCND2	5.05408	4.62952	6.31293
CCND3	7.75703	7.46267	10.0665
CCNDBP1	16.8763	18.091	19.8625
CCNE1	23.5403	21.079	19.9645
CCNE2	13.4379	15.3961	9.46649
CCNF	6.3997	4.95312	5.92098
CCNG1	7.54759	11.5544	10.3645
CCNG2	1.75394	1.85696	1.11026
CCNH	3.12778	3.38701	3.04786
CCNI	129.074	135.772	154.319
CCNI2	1.46418	1.43741	1.47124
CCNJ	4.03858	4.05315	4.69194
CCNJL	0.5622	0.495222	0.577941
CCNK	7.25729	7.00153	8.13744
CCNL1	35.8698	38.8717	27.1971
CCNL2	41.1233	36.7054	45.995
CCNQ	19.8225	21.8181	20.8696
CCNT1	10.5696	10.3249	13.9303
CCNT2	5.00987	4.60665	4.46104
CCNT2-AS1	0.0580402	0.0592733	0.0216964
CCNY	3.32697	3.26727	2.83397
CCNY-AS1	0.420383	0.432261	0.136469
CCNYL1	3.73606	4.10731	3.89123
CCP110	13.0668	14.5831	15.1286
CCPG1	2.03585	1.91721	2.22663
CCR1	1.46431	2.21712	1.88163
CCR10	4.15368	5.72817	4.12764
CCR2	0.47818	0.333648	0.070224
CCR7	3.22183	2.70339	4.41605
CCS	4.50866	4.14733	5.02113
CCSAP	3.50947	4.3232	3.29668
CCSER2	0.537054	0.542022	0.536391
CCT2	136.214	157.31	160.926
CCT3	23.3157	24.7561	26.1882
CCT4	144.905	171.324	126.245
CCT5	121.694	137.952	135.733
CCT6A	125.507	134.008	141.557
CCT6B	0.218011	0.248457	0.186763
CCT6P1	0.259421	0.077335	0.488308
CCT6P3	3.7214	3.26288	3.06265
CCT7	127.156	122.551	119.822
CCT8	125.076	130.683	141.78
CCT8P1	1.75054	1.14	5.09952
CCZ1	31.2568	37.4645	27.7233
CCZ1B	28.8315	34.9843	22.5046
CD109	2.38164	2.52588	2.02763
CD151	7.9361	8.15976	9.80356
CD164	18.0299	21.9044	16.6968
CD180	1.65957	1.97834	0.780726
CD19	0.786295	0.960109	1.88606
CD1A	1.257	1.47347	1.42141
CD1C	0.199275	0.681311	0.307281
CD1E	0.375926	1.22407	0
CD2	0.326649	0.223359	0.167897
CD22	0.946202	1.02512	0.83121
CD226	0.399641	0.451837	0.464086
CD244	9.77871	10.1872	12.0417
CD247	3.81386	3.8973	4.9996
CD248	6.82236	8.70072	9.93561
CD27	0.714725	0.371033	0.440842
CD274	0.602373	0.30598	0.322004
CD27-AS1	7.96309	6.26375	8.66059
CD28	6.08064	6.26013	7.55312
CD2AP	1.2743	1.18476	1.40972
CD2AP-DT	10.2548	1.43105	9.03592
CD2BP2	76.6299	83.7046	89.403
CD300LF	0.284864	0.202376	0.133109
CD302	1.09813	0.79687	0.79361
CD320	21.2552	21.9754	24.3224
CD33	1.77461	1.95963	1.90361
CD34	0.0476593	0.170704	0.0979874
CD37	11.4273	13.3506	14.1714
CD38	0.24508	0.220505	0.0464104
CD3D	381.191	409.685	436.618
CD3E	38.3084	52.8522	49.1937
CD3G	220.896	243.106	226.851
CD44	6.46168	8.36217	8.41215
CD46	4.13806	4.31389	4.74562
CD47	16.7121	17.6033	19.9517
CD48	1.25211	1.49309	1.34811
CD5	17.0397	14.6902	12.0893
CD52	96.0852	62.3894	110.783
CD53	4.07143	4.42088	4.11624
CD55	1.66645	1.62062	1.6522
CD58	1.49722	2.13951	2.146
CD59	25.9257	27.0325	28.0926
CD6	7.90213	9.4744	8.88878
CD63	1175.39	1001.43	842.732
CD69	26.711	36.81	20.0184
CD7	20.8121	25.4988	16.4994
CD72	1.01067	0.884692	0.84817
CD74	0.856672	0.977819	0.35798
CD79A	35.1894	47.6398	53.6549
CD79B	34.4067	43.9818	52.7786
CD81	39.3206	40.2569	47.3065
CD82	27.7711	34.5575	22.711
CD83	7.62173	6.17237	7.12746
CD84	10.7453	10.7546	10.7746
CD9	3.67372	3.39269	1.01826
CD93	93.9811	105.976	96.1842
CD96	1.15212	1.29128	1.39485
CD99	7.71605	8.77158	7.36694
CD99L2	0.799159	0.905416	0.971584
CD99P1	0.242316	0.207117	0.269858
CDADC1	1.81445	2.19741	1.97433
CDAN1	5.87174	5.17957	5.63373
CDC123	18.8862	21.146	18.5871
CDC14A	0.209619	0.231708	0.138933
CDC16	4.72746	5.65392	6.25209
CDC20	80.0193	87.6717	73.6691
CDC20P1	1.61147	0.31483	1.9879
CDC23	10.0474	13.0863	13.6942
CDC25A	21.5037	21.9421	20.8663
CDC25B	43.7974	44.0031	51.187
CDC25C	3.07802	3.07791	2.74293
CDC26	9.5788	12.4435	5.28751
CDC27	9.4774	8.70482	6.66606
CDC34	73.36	81.8541	65.1702
CDC37	84.851	92.1717	77.1804
CDC37L1	3.03397	2.88184	3.13614
CDC37L1-DT	5.49553	7.8084	7.19014
CDC40	2.21717	2.38241	2.47365
CDC42	15.6091	19.6304	18.687
CDC42-AS1	0.101391	0.0330142	0.10423
CDC42BPG	0.0895177	0.153028	0.092024
CDC42EP2	1.21628	0.75039	0.855493
CDC42EP3	3.45361	4.11191	3.20041
CDC42EP4	0.221433	0.415973	0.385225
CDC42-IT1	0.579781	0.188785	0.198671
CDC42SE1	14.3247	15.3712	12.4122
CDC42SE2	1.32748	1.37393	1.07222
CDC45	8.95084	9.6042	8.91163
CDC5L	6.70588	7.02496	6.46575
CDC6	25.4412	28.4547	27.8122
CDC7	12.768	14.0267	7.56016
CDC73	2.24919	2.75726	2.85092
CDCA2	3.93993	4.27525	4.3665
CDCA3	37.8571	43.4466	45.2629
CDCA4	43.2998	46.6464	43.0446
CDCA5	19.7002	21.7289	26.956
CDCA7	118.93	128.034	99.513
CDCA7L	12.9912	11.657	15.7873
CDCA8	58.8641	57.1441	65.556
CDH12P2	35.6901	26.9402	60.0373
CDH17	0.0160893	0.0209556	0.022053
CDH2	2.47571	2.21027	1.87988
CDH23	0.0196132	0.018032	0.0177903
CDH24	0.276858	0.405671	0.142305
CDH4	0.592048	0.609896	0.687319
CDHR3	0.00302837	0.0177495	0.00933948
CDIN1	0.119486	0.180197	0.174549
CDIP1	4.15457	3.68942	4.5709
CDIPT	30.2031	29.7838	48.3416
CDK1	95.884	112.134	103.203
CDK10	6.74799	4.56583	7.63696
CDK11A	9.67468	10.847	10.0853
CDK11B	9.82779	9.79443	12.5098
CDK12	5.78697	6.04111	5.39637
CDK13	2.29332	2.21494	2.26442
CDK16	3.50492	2.68454	3.84872
CDK17	1.87886	1.81217	1.18328
CDK18	0.0514335	0.100485	0.15862
CDK19	1.32606	1.37559	1.53208
CDK2	216.016	225.16	203.124
CDK2AP1	61.876	79.1785	64.9651
CDK2AP2	158.527	168.455	164.813
CDK3	35.165	30.2099	36.2926
CDK4	77.3484	75.5089	91.5172
CDK5	62.3985	52.0476	46.7398
CDK5R1	51.6229	40.2312	32.6574
CDK5R2	10.0959	8.53456	9.18107
CDK5RAP1	5.73706	6.47746	6.9795
CDK5RAP2	3.49247	2.99936	4.14356
CDK5RAP3	50.413	50.463	62.2832
CDK6	21.6656	23.2969	18.3829
CDK6-AS1	1.00037	0.913036	1.30089
CDK7	2.19972	3.22318	2.0515
CDK8	1.5034	1.46547	1.30874
CDK9	27.32	24.3787	18.6584
CDKAL1	0.0789632	0.076458	0.106096
CDKL1	0.254752	0.246168	0.320821
CDKL3	0.0399547	0.0669077	0.0389851
CDKL5	0.217303	0.147869	0.158566
CDKN1A	5.59969	5.60026	7.03569
CDKN1B	4.23496	4.329	3.80091
CDKN1C	1.69761	0.73702	1.16342
CDKN2A	14.2133	16.2842	11.7614
CDKN2AIP	61.9852	88.266	57.2138
CDKN2AIPNL	11.3756	11.1603	10.7323
CDKN2B	0.981528	0.73774	0.465696
CDKN2B-AS1	0.454795	0.599274	0.474847
CDKN2C	56.3489	63.511	72.0948
CDKN2D	405.16	383.427	293.598
CDKN3	11.4602	12.1648	12.8656
CDON	0.132135	0.0970927	0.195071
CDPF1	2.91553	2.99791	1.97181
CDR2	0.694344	0.760935	1.05691
CDR2L	14.3949	11.4624	10.7224
CDS2	2.52583	1.96855	2.3026
CDT1	46.3113	47.3109	47.0628
CDV3	166.737	173.898	116.835
CDYL	1.42866	1.57736	1.60416
CDYL2	0.528601	0.694573	0.64679
CEACAM1	0.0938734	0.0612953	0.12901
CEACAM21	0.854798	0.670534	0.612449
CEBPB	109.096	115.558	84.3156
CEBPB-AS1	0.140107	0.136863	0.57612
CEBPE	19.0897	15.9837	19.879
CEBPG	32.8666	40.2367	30.5297
CEBPZ	17.6737	14.7799	17.1379
CEBPZOS	18.614	18.6325	18.079
CECR2	0.0317085	0.0500354	0.0476407
CECR7	2.90989	2.21949	3.76993
CEL	1.81027	1.48159	2.11244
CELF1	27.5205	26.2434	27.3434
CELF2	9.25528	10.4434	7.37418
CELF2-AS1	12.5137	8.66506	11.0728
CELF5	0.448284	0.277198	0.416655
CELF6	0.313699	0.279865	0.140011
CELSR1	0.0519572	0.069453	0.0562231
CELSR2	1.71518	1.22507	1.49777
CELSR3	0.713525	0.750618	0.865156
CEMIP2	2.63974	2.5432	1.72212
CEMP1	51.6106	44.0144	35.992
CENATAC	8.89887	8.93351	9.71094
CENATAC-DT	0.60791	0.593833	0.312465
CENPA	9.1223	9.72	6.48602
CENPB	37.6381	42.159	29.4058
CENPBD1	17.9704	23.9221	19.9225
CENPBD1P1	4.20078	4.78846	4.66731
CENPC	2.76543	3.08292	2.32486
CENPE	3.43249	3.10445	4.4094
CENPF	34.4442	28.8301	38.024
CENPH	9.35061	9.6794	11.6688
CENPI	2.60438	2.23128	2.17256
CENPJ	9.65427	8.6633	9.96129
CENPK	8.91217	10.1412	7.16955
CENPL	7.46132	7.8105	7.84677
CENPM	14.8777	13.3548	20.5499
CENPN	4.23647	5.27036	4.74535
CENPN-AS1	1.02607	0.953032	1.36126
CENPO	6.50869	5.3504	5.97707
CENPP	0.846824	0.667663	0.872217
CENPQ	2.76363	2.41379	2.47335
CENPS	19.1942	23.333	16.7118
CENPS-CORT	0.37349	0.139623	0.274473
[truncated: 12,304 more rows]

## Sheet:  K562 H3K79me2 top 5%
gene_name	Length
SPG7	191997
JARID2	167923
MBNL1	155014
PRKCB	150654
CCNY	142513
KANSL1-AS1	136549
TBL1XR1	136434
CYTOR	129542
CAHM	120702
AC130895.1	115505
DYRK1A	112431
SGMS1	111828
GNAQ	110150
AC017002.5	106981
GATAD2A	106461
EPB41	106291
PIP4K2A	105017
ANKRD17	100234
GSE1	98944
ZEB2	96083
CUX1	95266
PUM1	92058
AC136619.2	90544
KDM6A	89009
SPRED2	88977
FAM193A	87524
AC004415.1	87042
AC005381.1	84824
USP6NL	84528
ASH1L	83549
RPL23AP11	83145
FABP5P3	82074
HMBOX1	82047
RTN4	81311
EEF1A1P25	80589
CCDC26	79840
TLK1	79835
E2F3	79697
RAB10	77766
RREB1	77261
NCAM2	76252
HERC1	75783
EIF3H	75275
TCF12	74971
SPEN	74636
GRB2	74142
AC092139.2	73301
RAB7A	70631
AL049830.4	70629
USP15	70400
HIVEP1	70214
AC017083.1	69531
CPED1	68845
RYBP	68368
STAG2	68049
PPP1R12A	67817
LCOR	67281
TBCA	67221
ZMYND8	67138
ANK1	66883
LYN	66778
MEMO1	66706
CDK17	66420
BRD4	66345
ELF1	66188
NFATC3	65831
KMT2E	65747
WNK1	65609
LINC01169	65394
MAN1A1	64467
MIR3686	64426
MAP4K3	64010
RNU7-19P	63747
PPP2R2A	63682
SGMS1	63249
CNST	63238
MAPK1	63159
AP000894.4	62974
TMCO1	62683
USP10	61465
RANBP9	61311
AC067931.3	61293
SEPTIN2	61104
CELF1	60556
PHTF2	60546
TET3	60271
BCL2L1	60265
LIMS1	60110
AFF1	60027
AC009299.3	60008
CDK6	59770
FNDC3B	59601
SELENOF	59590
PDZD8	59557
WAC	59147
AC010601.1	58819
PPP6R3	58751
PICALM	58580
UBE2G1	58231
HNRNPC	58079
FNIP1	58029
NFIC	57320
B4GALT5	57023
GPBP1	56908
UBE2V2P4	56898
RPTOR	56579
NUDT3	56441
EZH2	56252
RNU6-151P	56156
ARL15	55855
PIAS1	55585
IGF2BP2	55556
MIR5096	54934
ALDH1A2	54915
MARCHF3	54732
CDYL	54599
UBR5	54518
ARHGAP21	54285
JMJD1C	54250
UBE2L3	54219
EPC1	54186
FAM222B	53959
GNB1	53937
SOS1	53541
CTBP2	53510
NDUFC1	53500
Vault	53248
MKLN1-AS	53175
MED13L	53125
IGF2BP3	53015
CCDC6	52918
DHX15	52744
ARID1B	52521
ACTN4	52520
AC006387.1	52519
LRBA	52359
AC008764.7	52263
AC016727.1	51869
RNU6-268P	51455
TOP1	51434
C6orf106	51301
SKI	51210
CHAF1A	50886
MSN	50856
APTR	50384
FAF1	50350
MLXIP	50098
YY1	50026
KCMF1	49665
MIR3680-2	49383
RPL23AP23	49379
SP3	49195
USP12-AS1	49183
ARL8B	49106
TSC22D2	48955
RPRD2	48858
TRIM33	48811
AGPAT5	48712
SUSD6	48647
PHF3	48525
OSBPL3	48491
HMGB1P10	48255
MPC2	48212
ELL	48210
AC013429.2	48200
BCOR	48162
FOXN2	48047
NIPBL	47907
KIAA0232	47886
CDYL	47758
ATF7IP	47595
STXBP5	47434
RCL1	47288
TDGF1P6	47265
PVT1	47209
LARP4B	47142
KPNA6	47108
ELOCP33	47021
URI1	46790
SLMAP	46586
HK1	46509
ZMYND8	46470
RAF1	46432
PTBP3	46316
STAM	46255
STT3B	46118
BCAT1	46068
BCR	46061
COA1	46058
SCAF8	45850
AL392103.1	45794
COX6CP13	45610
AC009403.2	45595
MBNL2	45013
GRB10	44982
KIF2A	44960
ST3GAL2	44933
PDCD10	44802
EPGN	44773
NSD2	44600
FOXK2	44480
PTPN1	44444
AC245297.1	44419
BRAF	44005
MYO18A	43892
DLEU1	43837
RNU6-306P	43833
NFIA	43801
WASL	43652
CHD2	43634
ZNRF1	43570
RHOA	43385
ELOVL5	43381
AL391863.2	43360
VAPA	43358
NET1	43214
ATP2B1	43133
ZNF644	42954
AC005183.1	42938
CDC42BPA	42802
AC008026.1	42799
CDC42BPA	42762
KIF9-AS1	42540
SRSF11	42443
AC241952.1	42240
DNM2	42020
EIF4E	42015
AL512408.1	42002
SLC6A6	41987
USP47	41910
PDE4DIP	41869
MAP3K5	41867
AC068620.4	41855
IGF2R	41822
MFSD14B	41777
ZZZ3	41766
ZFPM2	41707
UBE2K	41697
CLINT1	41623
YWHAE	41534
MFSD14C	41515
CORO1C	41504
USP24	41423
RAP1B	41344
BZW2	41326
SH2B3	41259
XPO7	41240
CNOT2	41204
MECP2	41085
LINC02476	41006
SMG7	40970
CBFA2T3	40683
BAGE2	40476
RANBP3	40428
AXIN1	40322
ZNF609	40253
CSNK1A1	40068
NDUFA5P2	40052
YWHAQ	40025
USP9X	39983
AL353653.1	39889
PIEZO1	39850
MOB1B	39812
NPTN	39809
AC069277.1	39768
GALNT2	39672
ARHGAP6	39666
CUL1	39613
ARID2	39606
USP7	39583
PRR11	39558
TAOK3	39533
XPO4	39481
SPAG9	39471
MARCHF6	39347
PDLIM5	39264
AC008785.1	39113
KAT6A	39113
VRK1	38974
AC008038.1	38966
MIR626	38668
UBE2D2	38617
UBE3A	38446
UBA6	38393
LPIN2	38304
OSBPL3	38300
PRRC2B	38277
AAMDC	38196
MIR3680-1	38153
AL138724.1	38140
METAP1	38139
SMAD3	37944
AFDN	37916
CBFA2T3	37889
RNA5SP241	37877
Metazoa_SRP	37805
CCDC12	37737
TNPO3	37727
JAK2	37720
KMT2A	37699
AL357552.1	37594
LARP1	37546
CSNK2A1	37517
TEX2	37465
PGAM1P11	37461
SLC25A37	37430
AL591846.1	37427
SMAD2	37320
SND1	37267
AC110769.2	37250
KCNK5	37167
TNRC6B	37086
RBPMSLP	36910
OR51I2	36847
CRKL	36802
NACC2	36734
ROR2	36673
ARL15	36616
RALY-AS1	36604
XPO1	36549
NIPBL	36408
MTF2	36386
RSBN1	36338
CNOT6	36311
WASF2	36264
RICTOR	36119
RPRD1A	36104
FXR1	36033
ATF2	36026
ARHGAP18	35962
AC022973.2	35896
SDCCAG8	35749
PUM2	35729
SMAP2	35663
AL731577.2	35606
OSBPL8	35581
STK26	35561
EGLN1	35480
CAPZB	35448
PPTC7	35442
ARRDC1-AS1	35429
Y_RNA	35395
SCAP	35377
AC099811.6	35207
ZFPM1	35183
AC000123.3	35164
ARIH1	35095
ANP32A	35067
LYPLA1	35055
HNRNPA1	34992
ZNRF1	34990
AL021453.1	34977
PRPF40A	34916
XPO6	34864
PARGP1	34831
ZNF609	34818
TEC	34807
NEK7	34804
SAMSN1	34653
PTPN12	34569
ACSL3	34547
SETD5	34493
YWHAG	34417
SINHCAF	34388
YTHDF2	34296
PPP2R2D	34275
ACACA	34255
ATXN2	34252
AC244669.2	34202
CMPK1	34131
FAM208B	34102
DNAJC1	34097
TMEM161B-AS1	34097
IGF2BP1	34079
LINC02476	34066
CLTC	34037
TFDP1	34022
SGMS1	33996
ZNF451	33974
KIAA0368	33923
RNF111	33858
HIST2H2AA4	33772
VCL	33728
ETF1	33673
MAP3K4	33648
MIR7854	33530
ARID1B	33500
RAB8B	33445
UBAC1	33438
UBE2N	33359
CDC42	33285
SLC16A1-AS1	33284
EIF3E	33281
HIST1H3J	33150
ZDHHC17	33105
GID8	32994
RBM4	32969
NRIP1	32918
NFYC	32914
MIR1207	32889
RHOH	32883
AL354726.1	32866
AC009961.1	32813
CXXC5-AS1	32795
GTF2I	32793
NSD3	32738
TRIT1	32733
SRPK1	32654
EYA3	32651
ZFPM2	32641
RAPGEF6	32600
LRRC8B	32598
FAM126B	32571
DIAPH1	32511
PPP1R12A	32485
SLC7A1	32432
PTK2	32398
AL354928.1	32383
SEPTIN7	32369
RBM15-AS1	32300
ESYT2	32278
CEP350	32267
AC064847.1	32253
CUL3	32213
MBOAT2	32170
SCAF4	32165
STRBP	32090
ADNP	32050
ZNF654	32021
PPARGC1B	31950
FBXO5	31943
ASPH	31913
KDM1A	31908
ADD1	31895
PHF5A	31888
GOLPH3	31878
FBXO11	31868
USP3	31866
PSMB2	31856
NT5C3A	31796
ARHGEF12	31778
ZFP91-CNTF	31737
AC087190.4	31735
AK3P5	31688
ATG5	31679
KDM5B	31659
CDK13	31641
USP32	31599
TGFBR1	31596
AC090587.1	31566
EIF5B	31480
RNF24	31453
UBAP2	31332
SAFB	31312
NFE2L2	31292
CNOT1	31290
PPP2R5C	31283
GPBP1L1	31221
AC091046.2	31199
ERP44	31158
RNU6-613P	31155
AL512604.1	31129
RN7SL174P	31091
SMG1	31053
EP400	31003
LMNB1	30979
PTBP2	30946
KPNA4	30908
SPTB	30905
AC092910.2	30869
MED15	30842
LINC02062	30793
RNU6-545P	30701
SLC35F2	30696
SLC2A1	30602
UBAP1	30597
THOC2	30573
GALNT7	30565
SMG1P5	30509
YTHDF3	30441
DLG1	30424
CNOT4	30423
AP003357.1	30390
SENP5	30381
RLF	30354
GYPC	30346
TNRC6A	30267
ST7	30243
SPTBN1	30232
AL137077.1	30219
SLC25A25	30219
NAA50	30213
UBE3C	30196
AL133343.1	30185
YWHAZ	30173
DNAJB6	30170
IPO7	30117
AGAP1	30094
ARID3A	30036
KLHDC10	30024
PRPF4B	30011
ZNF638	30002
VMP1	29993
AL139125.2	29986
CD2AP	29972
NCOA1	29855
PRRC2C	29842
ABCC1	29831
EZR-AS1	29810
PPARGC1B	29792
ZMIZ1	29756
LATS1	29719
RBM26	29718
PI4KAP2	29679
GALNT2	29667
RHEB	29664
LIN54	29611
AMOTL1	29608
B3GNT2	29600
G2E3	29580
BACH1	29562
SLC5A3	29553
SNORD92	29552
ALG11	29551
BPTF	29537
CDC14A	29513
SON	29393
SORT1	29311
AC090970.1	29301
USP48	29245
RNF145	29221
TMEM245	29196
RIC1	29153
RNF138	29108
AGAP3	29073
FBXO11	29058
SERP1	29001
PTP4A2	28992
LSM12	28947
AC117513.1	28900
Y_RNA	28847
ANKRD28	28845
SATB2	28828
TXLNG	28765
PROSER2-AS1	28761
ELF4	28708
UBE2R2	28648
AGFG1	28627
SLC38A1	28586
LINC00534	28550
TBPL1	28544
RAB5A	28542
BCLAF1	28520
QSER1	28464
CKAP5	28455
MAP4	28429
ANKHD1	28413
PXT1	28410
PI4KAP1	28383
ANXA11	28374
RNMT	28374
TMX2	28307
LEMD3	28304
AC018692.3	28300
DNAJC6	28286
GMPS	28145
PRKAR2B	28122
ANKRD12	28089
SNORA74B	28066
PIGN	28047
AC016723.1	28029
SLC25A40	28021
CHST11	27984
ADCY7	27974
GON4L	27887
TMOD3	27879
C9orf147	27836
MTERF3	27808
RAB11FIP1	27803
CREB3L2	27797
MTX2	27789
NEAT1_2	27781
GOLGA4	27769
GALNT5	27764
CREBBP	27748
NOCT	27708
HIC2	27702
AC069431.1	27700
COA1	27686
ARMC8	27675
SSX2IP	27650
ATL2	27633
IPO11	27607
SEC11A	27606
CCDC144NL-AS1	27592
CEP83	27559
H2AFZP3	27558
ATP2A2	27542
G3BP1	27468
MAML1	27464
RN7SL503P	27461
EPC2	27453
KLF3	27433
AURKA	27413
LSM5	27378
Z98885.3	27366
NR3C1	27363
AL121983.2	27358
BCAS2P2	27351
DHX29	27288
PDHX	27277
AC069366.2	27276
RNF4	27250
SMARCC1	27206
AC016065.1	27186
TNFAIP8	27178
RPRD1B	27177
CTDSPL2	27163
FOXJ3	27157
TP53BP2	27146
ATP13A3	27111
RAD23B	27095
TSPAN14	27087
RAB1A	27082
NUFIP2	27047
LARP4	27034
SCAF11	27033
ERBIN	27014
ATP1B3	27010
MIR5690	26986
FTH1P25	26940
GNAI3	26896
AC073365.1	26889
EP300	26868
NUDT4	26847
MINOS1-NBL1	26846
Y_RNA	26840
UBQLN1	26823
DSCR8	26811
TMED5	26705
UBE2G2	26694
MIR548Z	26666
IMMT	26665
CREB1	26638
PPP1CB	26629
SIAH1	26616
WAPL	26612
TAB2	26606
STAT5A	26602
SMS	26601
BIRC6-AS1	26591
ZNF292	26586
EXOC5	26567
SYNCRIP	26525
FAM83D	26421
PKN2-AS1	26421
ATM	26404
GATAD2B	26390
RAB2A	26390
AP005263.1	26375
TAOK1	26372
CHD6	26361
AC013565.3	26359
SRPK2	26350
BCR	26343
SLC7A5	26343
CDC42SE2	26333
AC108688.1	26323
PJA2	26288
ITPRIP	26268
GALNT2	26253
FAM120AOS	26250
MIR4505	26246
SZRD1	26194
OSBPL9	26151
MAPKAPK5-AS1	26149
DDX6	26080
DMXL1	26057
MAPK8	26055
IST1	26038
AC002366.1	26002
HIRA	25948
VAPB	25939
RPS10-NUDT3	25914
CHD6	25896
AC073592.6	25885
SP1	25882
HIST1H2BC	25877
ARHGAP6	25834
ARHGEF12	25828
NAP1L1	25824
ASB3	25785
ITFG1	25755
PDE3B	25735
CUL5	25701
RALBP1	25684
CACUL1	25661
AC007383.2	25646
PHF21A	25623
UBXN7-AS1	25609
MTPN	25574
MTDH	25534
CASS4	25529
PURG	25517
VDAC2	25508
IREB2	25488
ERH	25486
SNX5	25486
SMARCA4	25466
PPM1B	25458
ROR2	25457
MYH10	25454
RFWD2	25440
NASP	25412
SLC25A24P2	25409
ZFR	25342
CAMSAP1	25318
KHDRBS1	25287
LSM1	25264
UBE2E3	25260
NIPA1	25253
IQSEC1	25244
ZFAND6	25231
PCID2	25229
TMPO	25209
GGPS1	25203
CMC2	25195
VPS37B	25188
TSPAN14	25152
RACK1	25138
UBE2Q2	25103
PPP2CA	25101
RN7SKP230	25093
PVT1	25081
DCAF7	25061
HIPK1	25034
RBM39	25023
SMAD5	24973
AP003086.2	24934
GSK3B	24934
GAB2	24910
HIST1H2BK	24902
FUBP1	24818
MATR3	24808
DGCR2	24798
AC104763.2	24781
CNOT7	24773
TXNRD1	24762
PPARGC1B	24702
ANGPT1	24698
MPP1	24669
PI4KA	24644
STK24	24642
ROCK2	24628
AC004980.1	24611
SRSF4	24575
CAVIN2	24560
CPNE1	24536
CTNNB1	24501
GALK2	24465
LINS1	24438
UBE2D3	24389
HACD3	24378
RAPGEF2	24351
SND1	24322
KLF9	24282
CABIN1	24266
TCEA1	24261
FAM168B	24257
RN7SL524P	24249
RNF111	24207
STAU1	24199
MLLT10	24184
FAM117A	24175
UCHL5	24169
CAPRIN1	24149
PDS5B	24139
USP15	24091
CTSC	24072
SLC25A13	24066
UGCG	24057
ILF3	24020
ZNF385D	24012
AL033528.2	24005
SMYD3	23995
PTGES3	23970
POU2F1	23962
DEPDC1B	23953
PRDM2	23923
LUC7L3	23910
STK24-AS1	23892
RAD51AP1P1	23851
VAPB	23841
C8orf44-SGK3	23840
PIGL	23839
ATAD2	23837
DDX24	23816
AC090114.3	23811
PAPD7	23798
PEX14	23735
NSMAF	23724
MIR548AC	23694
SEC63	23661
AEBP2	23660
HAT1	23623
ARL15	23618
PSPC1	23608
SREBF1	23600
PPP4R3B	23579
REV1	23555
CNKSR3	23549
PLEKHF2	23540
DTL	23530
GLRX3	23524
NFAT5	23520
AL831737.1	23518
CEP44	23515
PKN2	23512
KAT6A	23494
ADK	23468
LSM14A	23467
STON2	23466
FDFT1	23448
ABCC1	23432
ACYP2	23422
UIMC1	23397
MCM4	23364
CNOT10	23360
ARID1B	23353
RHOBTB3	23352
SRD5A1	23326
INTS13	23283
LINC01562	23277
HNRNPF	23228
TBC1D14	23227
LRBA	23206
RHAG	23192
GABRG3	23189
ZNF121	23185
IKZF1	23179
CLCN3	23173
AL162385.1	23141
RYK	23141
ZNF217	23138
MBD5	23125
SUV39H2	23123
EIF3H	23106
AC010522.1	23076
CENPT	23065
RNF139	23056
LRRC8D	23044
CEP57L1	23028
PSMB7	23016
PRKAA1	23014
CFLAR	23006
GSPT1	23002
PDCD6	22975
GAPVD1	22953
Y_RNA	22951
SIAH2	22943
DDX42	22916
P4HA1	22916
AL139099.3	22895
CRLS1	22868
MAEA	22867
MIR3176	22862
SIK3	22851
AL133477.1	22835
USP22	22829
TMEM68	22824
DPY19L2P3	22819
SNORA72	22809
ETFA	22793
AC012555.2	22771
SCARB1	22751
PPP4R3A	22726
NRDC	22724
PAPOLA	22698
DOT1L	22680
PVT1	22678
OTUD5	22664
ZCCHC7	22661
HECTD1	22650
LMBR1	22645
ANAPC10	22624
SMG1P1	22614
CLASP1	22605
MIR3139	22579
ST7L	22571
TUFMP1	22566
LUZP6	22508
GOLIM4	22483
CSTF3-AS1	22473
SENP6	22464
ADGRV1	22463
SND1	22461
ZFX	22435
Y_RNA	22434
PRR4	22431
SAMD11P1	22425
AC011257.1	22422
AKIRIN2	22416
AP3B1	22393
CEP85	22385
CLIC2	22380
RBM6	22379
AC117430.1	22377
ANKRD28	22368
HECTD4	22366
CTNND1	22356
CPEB4	22352
GTF2E2	22333
TRAPPC10	22333
HS2ST1	22326
AL022722.1	22319
SLC25A24P1	22296
AC090543.2	22291
HNRNPM	22278
PDIA5	22264
AC087380.1	22250
AC087633.2	22246
DRAM2	22238
LUC7L2	22223
PPM1G	22211
LIN28B	22171
HMGB3P21	22159
RNU6-595P	22151
ATIC	22142
JADE1	22122
SIN3A	22084
ADGRF3	22059
NDFIP1	22050
TCERG1	22044
ACACA	22036
NUP210	22036
POGZ	22014
SPRED1	21976
PARG	21967
PPP4R1	21943
AC019080.1	21940
DNAJC6	21903
SERTAD2	21876
WDR33	21875
ATF7IP2	21872
VPS13A-AS1	21861
ARIH2	21860
NUS1	21857
POLK	21853
POLR1A	21847
ACAP2	21823
FBXO31	21805
HNRNPDL	21791
HNRNPD	21788
C18orf25	21782
LINC02486	21777
TMEM57	21777
RNU1-134P	21758
ARHGAP6	21745
TGFBRAP1	21739
FOXK1	21717
PRELID1P3	21693
XRN2	21690
AC010601.1	21665
TMEM11	21665
TMEM63B	21635
ZFX	21609
ARHGAP22-IT1	21606
CLASP2	21601
TTC7B	21594
DNAJC11	21592
CHD9	21581
PCMT1	21577
MEF2C	21568
TRIM44	21550
ZFC3H1	21529
AL158801.1	21516
PTPN11	21505
HDAC7	21488
PANK2	21476
RPS6KC1	21467
METTL15	21449
DNM1L	21435
CDC27	21432
PCF11	21410
SUN1	21403
UBE2V1	21394
GYPA	21385
DCAKD	21372
NF1	21368
C2orf88	21344
KLHL18	21342
ZNF644	21313
MROH8	21284
AC068491.1	21278
TRMT1	21263
SUGP2	21236
KDM2A	21229
ZNF207	21215
SLAIN2	21199
TMEM181	21153
PPP2R5A	21148
MAP4K5	21142
IP6K2	21139
TPX2	21111
KMT2C	21087
AC006460.2	21081
WDR4	21075
AC127024.2	21031
MAP4K4	21001
POLR2CP1	20996
U2SURP	20990
RAB27A	20974
RNU4-89P	20953
EHMT1	20941
KIF13A	20926
FBXO18	20921
PAIP2	20908
XRRA1	20885
CAP1	20858
PAFAH1B1	20804
CHD9	20798
HERC2P9	20771
MARK3	20762
JARID2	20751
ATP6V0E1P1	20746
IWS1	20743
REXO1	20734
VWDE	20710
RNF216	20702
AC093155.3	20694
Y_RNA	20693
GALNT7	20678
MARK2	20655
AC018816.1	20649
ANKRD28	20638
YBX1	20623
PDE8A	20620
SEC24B-AS1	20618
HSF1	20610
DDX31	20599
SMURF1	20594
EGLN3	20582
RN7SL65P	20580
GPATCH8	20557
UBE2F	20551
CRTC3-AS1	20532
NAP1L4	20501
DNAJC7	20499
WTAP	20495
PPIG	20491
AMD1	20478
AC018463.1	20475
TTC17	20472
MFSD14A	20443
APLP2	20439
RBPJ	20427
MRRF	20425
ZSCAN12	20420
ELP4	20413
PLD1	20398
TOP2B	20393
TMEM248	20347
AC013356.3	20330
EPS15	20327
PSMA7	20299
PLEC	20293
YY1AP1	20285
AC091046.1	20274
TM9SF3	20268
NCK1	20263
AKT2	20249
TBC1D23	20240
PSMB7	20234
C1orf43	20233
AL928654.2	20220
SZRD1	20210
ZBTB8OS	20202
RAB6A	20199
RNF217	20199
STK40	20156
LCORL	20136
AC010654.1	20125
LCLAT1	20118
PKP4	20109
DCAF13	20100
JMJD1C	20093
SNHG1	20073
BAZ2A	20054
AC246817.2	20052
AGO1	20037
ATP7A	20032
AGFG1	20026
KDM3B	20026
ZBED4	20018
FGFR1OP	20015
MAP3K1	19995
AC015574.1	19983
GOPC	19977
EXOSC7	19974
MIER1	19970
HK2	19968
TUBGCP3	19964
VTA1	19960
ADD3	19956
BICD2	19942
RALGDS	19924
RNF24	19906
ST7-OT4	19868
SUSD1	19854
SKI	19852
SLC20A2	19844
DOCK11	19832
CMBL	19824
HPS5	19817
RXRA	19783
XIST	19777
RSL1D1	19774
TRPM7	19770
GRB10	19768
PPP2R5C	19759
RUNX1	19753
OLA1	19752
HUWE1	19747
PTEN	19745
AL356599.1	19730
ORC4	19715
CHPT1	19702
SNX13	19698
PSAP	19696
STK3	19696
RFWD3	19676
LMBR1	19663
ARF4	19660
AC132216.1	19659
RAB14	19656
LEPR	19632
MAPK14	19618
LDLR	19615
YTHDF1	19604
MDN1	19599
AC012291.1	19596
Y_RNA	19594
AIG1	19585
ARF1	19584
DGUOK	19547
COPZ1	19539
TPP2	19528
LRPPRC	19522
LINC01547	19463
ABHD17B	19460
FRRS1	19458
DR1	19435
PLEKHB2	19394
ATF1	19392
ETNK1	19348
ARAP1	19346
MIR4639	19336
AL161644.1	19304
XPR1	19296
C2CD3	19266
SAE1	19265
GNA13	19264
FAF1	19257
RTF1	19240
AC011287.1	19227
NFIA	19209
CSDE1	19195
LNP1	19195
RRP15	19191
TMA16	19190
RPS6KB1	19177
NUMB	19175
LINC01029	19173
SSBP2	19165
SMAD4	19161
GORASP2	19159
RHCE	19147
IPO9	19128
AP002360.1	19111
HOXB3	19101
BTBD7	19080
NKTR	19079
AC091231.1	19065
RBM25	19057
TIPARP-AS1	19040
ACSL3	19011
AC079062.1	19005
MYO1D	19000
POLR2B	18988
MIR1469	18984
HECTD4	18978
HNRNPLL	18953
ZNF675	18951
HCG18	18944
FAM192A	18940
F11R	18939
PDLIM1	18935
KTN1	18922
BRD7P4	18920
ZFPM2	18912
PAFAH1B2	18901
CYCSP2	18900
AC006001.3	18892
PAK2	18848
RB1CC1	18845
STARD8	18842
UPF1	18838
HMGB1P7	18836
DUSP14	18831
ZNF512	18827
TBC1D14	18826
OXSR1	18792
SEPTIN9	18787
NAA25	18778
AC091959.3	18758
CDYL	18758
AC079949.1	18743
SMYD3	18729
RAB9A	18713
TMEM165	18697
HBBP1	18685
MGAT1	18676
ZNF346	18676
DYNC1LI1	18661
OSBPL9	18645
DCUN1D4	18637
XIAP	18634
ZNF148	18614
MSH6	18601
HNRNPA2B1	18600
RC3H1-IT1	18581
Y_RNA	18577
SPOP	18572
SPTLC2	18558
XPR1	18557
CCNT2	18548
TRA2B	18538
WASF2	18520
SF3B3	18517
NUDCD1	18478
KMT5A	18474
TAF5L	18470
ATRX	18467
GSKIP	18463
ZBTB7A	18454
MED13L	18447
C4orf33	18442
TOMM20	18438
ASIC4	18435
WT1-AS	18422
UBR4	18420
KLC1	18415
NCOA4	18409
NOP58	18408
CALU	18402
FRYL	18398
CAVIN1	18395
SLC11A2	18387
RAI1	18374
DLC1	18370
RSRC2	18353
AC007191.1	18340
CYSTM1	18328
TNIK	18325
ATAD2B	18322
AL157756.1	18319
RNF121	18313
PGAP2	18304

## Sheet: K562 RNA seq
gene_name	K562 S1	K562 S2		gene_name	K562 S1	K562 S2	K562 S3
5_8S_rRNA	14.6858	0		5_8S_rRNA	0	0	27.0346
7SK	69934.5	84487.8		7SK	122076	121317	112429
7SK	24.4158	0		7SK	2.5847	0	5.18435
7SK	0	0.521677		A1BG	0.865966	1.07948	1.15201
A1BG	0.675653	0.850681		A1BG-AS1	0.940545	1.06599	0.609278
A1BG-AS1	0.687715	0.909092		A2ML1	0.0317319	0.00213537	0.0144654
A2ML1	0.00963419	0.00482937		AAAS	9.89398	10.0054	9.50879
A4GALT	0	0.00266399		AACS	0.639234	0.545322	0.515562
AAAS	7.16728	9.56613		AACSP1	0.0381321	0.0410572	0.0217288
AACS	0.263639	0.303835		AAGAB	4.21717	3.99859	4.13096
AACSP1	0.136356	0.0797974		AAK1	0.429638	0.377446	0.297013
AAGAB	2.4083	2.16743		AAMDC	0.123322	0.152558	0.153105
AAK1	0.136655	0.130236		AAMP	28.0269	27.9045	24.8603
AAMDC	0.0531094	0.0467223		AAR2	1.54521	1.51356	1.3653
AAMP	28.3415	28.1369		AARS1	51.6325	43.8835	47.7531
AAR2	1.87708	2.11485		AARS2	9.05845	9.14197	6.3704
AARS1	14.2902	14.7876		AARSD1	4.60131	4.1353	4.04126
AARS2	9.45728	9.43107		AASDH	1.84695	1.86852	1.60114
AARSD1	4.35843	3.83629		AASDHPPT	13.0331	13.1796	11.0447
AARSD1P1	0.383893	0.119812		AATBC	0	0	0.923093
AASDH	0.522952	0.475329		AATF	1.68316	1.52956	1.63596
AASDHPPT	5.90569	5.23862		AATK	0.0389452	0.0271329	0.0541887
AATBC	0.485763	0		ABALON	0.46967	0.939152	3.34666
AATF	2.01749	2.09615		ABAT	0.00232193	0.00875016	0.0116433
AATK	0.0521254	0.0146436		ABCA1	0.00173541	0.00653987	0.00237334
ABALON	13.5694	0.163384		ABCA11P	0.17525	0.139106	0.11301
ABAT	0.00438647	0.000706764		ABCA13	0.00321863	0.00288794	0.0034236
ABCA1	0	0		ABCA17P	0.0131256	0.0219838	0.019945
ABCA10	0.00176471	0.00398072		ABCA2	2.27827	2.06638	2.15231
ABCA11P	0.0740737	0.0883211		ABCA3	1.95266	1.89474	1.59724
ABCA13	0.0015925	0.0021227		ABCA5	0.0985327	0.0480725	0.0898351
ABCA17P	0.0224346	0.0190884		ABCA6	0.00606148	0.00652645	0.0110528
ABCA2	0.923074	1.00706		ABCA7	8.10247	7.83174	6.92301
ABCA3	0.644912	0.850804		ABCA8	0.173908	0.1576	0.167806
ABCA5	0.0452892	0.0210881		ABCB1	0.0746766	0.0555644	0.0487111
ABCA6	0.00763401	0.00369006		ABCB10	10.0383	8.9504	9.12488
ABCA7	3.86948	4.89612		ABCB10P1	7.60557	8.20528	8.13559
ABCA8	0.296857	0.276586		ABCB10P3	38.0791	38.2445	26.9479
ABCB1	0.00589861	0.00147841		ABCB10P4	62.4507	64.8152	54.5908
ABCB10	3.90678	4.02708		ABCB11	0.0055118	0.00712152	0.00100505
ABCB10P1	3.67823	1.93463		ABCB4	0.0259452	0.0296814	0.0206981
ABCB10P3	23.0227	20.4351		ABCB6	10.1578	10.5871	10.0074
ABCB10P4	23.635	26.8808		ABCB7	1.49086	1.46863	1.66547
ABCB11	0.00892508	0.00268434		ABCB8	8.57331	8.97536	8.33977
ABCB4	0.0144417	0.0187563		ABCB9	0.342878	0.36465	0.259422
ABCB6	5.02453	6.28799		ABCC1	0.742604	0.783277	0.801786
ABCB7	0.38409	0.39753		ABCC10	2.59109	2.69447	2.27656
ABCB8	6.33076	7.90506		ABCC13	0.0100896	0.00434543	0.00827909
ABCB9	0.547189	0.485339		ABCC3	0.0177717	0.0239187	0.00810148
ABCC1	0.442365	0.521949		ABCC4	1.3723	1.30379	1.22761
ABCC10	1.76014	2.35258		ABCC5	1.9933	2.08027	2.23902
ABCC11	0.00589417	0.000950289		ABCC9	0.033426	0.0104182	0.0352874
ABCC13	0.000272296	0.000307114		ABCD1	0.686537	0.849735	0.801431
ABCC2	0.00541844	0.00333342		ABCD2	0.00183003	0.00985205	0.0116794
ABCC3	0.000599524	0		ABCD3	1.1205	1.18452	0.996048
ABCC4	0.434708	0.434542		ABCD4	1.94418	1.96263	1.7282
ABCC5	0.860364	0.860528		ABCE1	26.0455	25.6324	24.5383
ABCC6	0.00232962	0.002102		ABCF1	11.9675	11.7661	10.1303
ABCC9	0.00118697	0.00696144		ABCF2	13.8196	14.1088	10.9256
ABCD1	0.637228	0.806594		ABCF2-H2BE1	8.91971	8.481	8.07265
ABCD2	0	0.00278518		ABCF3	10.611	10.7194	8.29019
ABCD3	0.585895	0.541822		ABCG2	0.00180498	0.00291515	0.00493694
ABCD4	1.03525	1.18045		ABHD1	0.0181781	0.0978627	0.165735
ABCE1	14.1799	13.676		ABHD10	4.784	4.28929	4.88868
ABCF1	14.7111	16.8891		ABHD11	8.28389	6.97603	5.48517
ABCF2	12.4411	18.5286		ABHD12	0.328196	0.351942	0.367067
ABCF2-H2BE1	10.9468	9.946		ABHD13	2.40835	2.68849	2.8567
ABCF3	10.7775	11.246		ABHD14A	0.780669	0.954154	0.947714
ABCG2	0.000487123	0.000549409		ABHD14A-ACY1	0.311112	0.765957	0.258143
ABCG4	0.0152002	0		ABHD14B	9.43485	8.80227	8.91378
ABHD1	0.107929	0.0276658		ABHD15	2.61621	2.711	1.47062
ABHD10	1.34869	1.51302		ABHD16A	14.2069	13.4444	13.2154
ABHD11	18.3597	18.9465		ABHD17A	17.5346	16.9173	14.751
ABHD12	0.206909	0.192112		ABHD17AP3	0.038633	0	0.331328
ABHD13	1.23036	1.35336		ABHD17B	1.06879	0.947693	0.933838
ABHD14A	0.753521	1.03346		ABHD17C	0.0117699	0.00543117	0.00459897
ABHD14A-ACY1	0.700786	0.436365		ABHD18	1.15285	1.04607	0.908929
ABHD14B	4.80007	7.88512		ABHD2	2.03699	2.12863	1.74952
ABHD15	1.36663	1.6765		ABHD3	0.943168	0.992553	0.77781
ABHD16A	10.8216	12.1767		ABHD4	2.77035	2.83601	3.55944
ABHD16B	3.11323	0		ABHD5	5.22976	5.14328	8.76038
ABHD17A	27.5678	29.3126		ABHD6	0.166843	0.260007	0.190144
ABHD17AP1	0.327484	0.171645		ABHD8	0.937913	0.865593	0.860165
ABHD17AP3	0.875218	0		ABI1	1.49658	1.41325	1.3795
ABHD17AP4	0.312943	0.016759		ABI2	0.9738	0.940309	0.926282
ABHD17AP6	0.0017866	0		ABITRAM	3.36686	3.28869	4.08814
ABHD17B	0.485682	0.337284		ABL1	2.92422	2.78172	2.90063
ABHD17C	0	0		ABL2	0.773808	0.748794	0.654599
ABHD18	0.461616	0.485239		ABLIM1	0.00416833	0.00530409	0.00518234
ABHD2	1.86471	2.24607		ABLIM3	0.00536213	0.00808283	0.00879985
ABHD3	0.424022	0.456598		ABO	0.325577	0.305527	0.283222
ABHD4	0.653335	0.775793		ABR	0.0152393	0.012762	0.0138941
ABHD5	1.50325	1.56025		ABRACL	0.280661	0.377737	0.231897
ABHD6	0.0965715	0.140326		ABRAXAS1	4.3406	4.12442	3.49359
ABHD8	0.788102	0.59244		ABRAXAS2	1.53517	1.71605	1.23932
ABI1	0.821034	0.803467		ABT1	31.6932	29.9132	27.7889
ABI2	0.256671	0.255739		ABTB1	0.367456	0.430047	0.378719
ABITRAM	1.00351	1.49087		ABTB2	0.00801781	0.00664065	0.0157448
ABL1	1.61276	1.96995		ACAA1	1.38859	1.41048	1.42414
ABL2	0.44093	0.456462		ACAA2	3.7875	3.58505	3.16755
ABLIM1	0	0.000346031		ACACA	1.1735	1.26864	1.03557
ABLIM2	0	0		ACACB	0.0623123	0.0779721	0.073702
ABLIM3	0.00463078	0.00261145		ACAD10	1.16443	1.19184	0.968259
ABO	0.263598	0.287302		ACAD11	0.294702	0.278413	0.259589
ABR	0.00868249	0.000515405		ACAD8	5.41522	5.60722	4.644
ABRACL	0.0473401	0.0427146		ACAD9	1.25647	1.29713	1.01187
ABRAXAS1	0.675723	0.862148		ACADM	4.18162	4.50893	3.57134
ABRAXAS2	0.554719	0.670258		ACADS	3.79416	3.07115	2.98493
ABT1	40.4097	44.7557		ACADSB	0.341786	0.381944	0.361192
ABT1P1	0.755484	0		ACADVL	57.6786	58.3379	56.9337
ABTB1	0.146597	0.145889		ACAP1	1.33243	1.65536	1.64312
ABTB2	0.00798953	0.000187732		ACAP2	2.34655	2.32315	2.39119
ACAA1	2.27584	2.38905		ACAP2-IT1	0.379444	0.612827	0.288292
ACAA2	0.832369	0.923028		ACAP3	6.51021	6.00367	5.89625
ACACA	0.832866	0.931625		ACAT1	8.60888	8.2907	8.2215
ACACB	0.0172712	0.0233243		ACAT2	40.1415	37.9371	32.1828
ACAD10	0.256059	0.346232		ACBD3	8.35375	6.8505	9.48866
ACAD11	0.0635352	0.0693485		ACBD4	1.65364	1.66179	1.06542
ACAD8	3.55003	3.0598		ACBD5	0.888014	0.772614	1.02462
ACAD9	1.34661	1.48255		ACBD6	0.675894	0.644075	0.60465
ACADM	2.17754	2.02003		ACBD7	0.911885	0.599436	0.64761
ACADS	2.5587	2.34255		ACCS	3.26999	3.22055	2.80971
ACADSB	0.336818	0.331809		ACD	11.5549	12.4412	11.1339
ACADVL	33.0579	30.6357		ACE	0.191644	0.212793	0.109205
ACAP1	0.62929	0.519967		ACER2	0.26419	0.259171	0.117758
ACAP2	1.00019	0.884907		ACER3	0.418585	0.439924	0.413906
ACAP2-IT1	0.0341345	0.0577488		ACHE	1.00595	1.22097	0.583646
ACAP3	5.53767	5.36932		ACIN1	10.6762	10.5007	11.7332
ACAT1	5.10478	4.56435		ACKR1	0.19988	0.0860848	0.218683
ACAT2	9.86096	8.49113		ACKR4	0	0	0.076048
ACBD3	2.30968	2.54369		ACLY	15.4582	14.712	13.1956
ACBD4	0.678347	0.74495		ACO1	2.13451	2.08272	1.96767
ACBD5	0.492071	0.377174		ACO2	4.26426	4.00226	4.12279
ACBD6	0.661135	0.667339		ACOT11	0.00790313	0.0099276	0.00240184
ACBD7	0.230554	0.189913		ACOT13	4.62639	4.58364	4.2877
ACCS	1.22496	1.29458		ACOT7	0.372699	0.34927	0.364659
ACD	12.5779	16.1506		ACOT8	3.14221	2.98007	3.09688
ACE	0.140615	0.0492192		ACOT9	1.78192	1.65172	1.56768
ACER2	0.201822	0.171554		ACOX1	3.7521	3.80635	3.46106
ACER3	0.168204	0.222033		ACOX3	0.245274	0.245621	0.179837
ACHE	1.22909	1.23036		ACP1	23.7871	22.2974	20.9798
ACIN1	9.39624	10.4383		ACP2	2.8049	2.27578	1.84224
ACKR1	0.0647317	0.0730087		ACP3	0.0175492	0.016196	0.00914292
ACKR2	0.000828108	0.00140099		ACP5	0.293592	0.221279	0.428281
ACKR4	0.0127049	0		ACP6	0.059354	0.063907	0.0427222
ACLY	7.89257	8.10829		ACRBP	0.709426	0.866671	0.758751
ACO1	1.07205	1.07454		ACSBG1	0.0179557	0.0386661	0.0403749
ACO2	2.7974	3.70973		ACSF2	0.186196	0.180713	0.176933
ACOT11	0.0156411	0.0144336		ACSF3	0.847882	0.804026	0.66238
ACOT13	1.75672	1.3704		ACSL1	1.08817	0.930361	0.993748
ACOT7	0.537752	0.693576		ACSL3	7.47966	6.95127	7.02517
ACOT8	2.28839	2.5051		ACSL4	2.74061	2.77577	2.26618
ACOT9	0.792195	0.820416		ACSL5	0.014118	0.00506699	0.0193077
ACOX1	1.28794	1.35978		ACSL6	0.0820122	0.145704	0.0659432
ACOX3	0.113409	0.120079		ACSM1	0.0219398	0.0345256	0.0492386
ACOXL	0.000710359	0.000200298		ACSM3	2.51771	1.77149	2.32571
ACOXL-AS1	0	0		ACSS1	0.0387278	0.049517	0.0331024
ACP1	13.9137	13.0219		ACSS2	10.3077	10.0195	8.46556
ACP2	2.14671	2.4804		ACTB	110.171	105.116	115.323
ACP3	0.0081191	0.00152621		ACTBP11	0.907162	0.610468	4.92796
ACP4	0.172115	0		ACTBP2	1.25068	1.71388	0.449293
ACP5	0.103004	0.107238		ACTBP8	0.691424	1.613	1.57598
ACP6	0.00505842	0.0161648		ACTG1	192.908	170.427	212.12
ACRBP	0.574375	0.606292		ACTG1P1	0.678564	0.608846	0.206222
ACRV1	0.106843	0		ACTG1P14	0.227599	0.490116	0.415017
ACSBG1	0.0770221	0.0298116		ACTG1P17	0.0881789	0.0738446	0.0535968
ACSBG2	0.0101265	0		ACTG1P20	1.63696	2.93755	3.97991
ACSF2	0.0523733	0.0510877		ACTG1P25	0.141996	0.132503	0.0949388
ACSF3	0.772275	0.77579		ACTL10	0	0	1.17662
ACSL1	0.707813	0.686999		ACTL6A	10.0658	9.72817	9.42812
ACSL3	3.98379	3.35532		ACTL8	0.0213603	0.0114994	0.016229
ACSL4	0.670168	0.764762		ACTN1	1.84287	1.63569	1.65866
ACSL5	0.0368313	0.0207704		ACTN2	0.00889414	0.0095764	0.0104259
ACSL6	0.0304076	0.0196246		ACTN4	7.05634	6.21205	6.3249
ACSM1	0.0027328	0.00616447		ACTR10	2.62498	2.23091	2.47838
ACSM2B	0.00257143	0.00676719		ACTR1A	4.0401	4.09753	3.54096
ACSM3	0.899595	0.822573		ACTR1B	17.2008	16.6208	13.4852
ACSS1	0.011105	0.00368381		ACTR2	13.0631	12.5565	11.6906
ACSS2	2.16506	2.53449		ACTR3	13.611	12.6914	13.7926
ACTA1	0.0921359	0.0103917		ACTR3B	0.303004	0.416533	0.212453
ACTA2	0.00275701	0.000690736		ACTR3C	0.222475	0.343233	0.158575
ACTB	46.3808	61.6765		ACTR5	1.23645	1.03418	1.17085
ACTBP11	0.85688	0.862898		ACTR6	5.81307	5.14606	4.84502
ACTBP2	8.0094	0		ACTR8	2.53047	2.34186	2.23766
ACTBP4	0.289841	0.181612		ACVR1	0.34637	0.287556	0.240171
ACTBP8	1.9904	1.5083		ACVR1B	0.925688	0.933078	0.643884
ACTG1	130.832	178.809		ACVR1C	0.0162577	0.0215444	0.011402
ACTG1P1	0.213651	0.137697		ACVR2A	0.118348	0.105127	0.109477
ACTG1P10	0.79208	0		ACVR2B	8.23942	8.62981	6.00467
ACTG1P14	0.522103	0.450307		ACVR2B-AS1	0.269232	0.217413	0.276149
ACTG1P17	0.015865	0.0626277		ACVRL1	0.10864	0.0919079	0.0919752
ACTG1P20	3.38698	2.90657		ACY1	29.3806	29.0185	23.3186
ACTG1P24	0.157167	0.31021		ACYP1	1.8154	1.81081	1.78171
ACTG1P25	0.0255478	0.0115258		ACYP2	0.0232871	0.0279507	0.0237005
ACTG1P3	1.45383	1.01174		ADA	0.351292	0.243754	0.291814
ACTL10	1.17547	0		ADAL	3.69724	3.50913	2.77659
ACTL6A	7.25994	6.4278		ADAM10	1.88769	1.87963	1.68635
ACTL8	0.0749408	0.0677268		ADAM11	0.0335141	0.0240566	0.0101852
ACTN1	1.28575	1.51013		ADAM15	8.07302	7.41996	7.9515
ACTN2	0.0185168	0.00657476		ADAM17	3.46863	3.23917	2.71444
ACTN4	6.12498	6.35373		ADAM19	0.0368367	0.0343232	0.0561904
ACTN4P1	0.28498	0.0267849		ADAM22	0.00237552	0.0030693	0.002599
ACTR10	0.942951	0.825239		ADAM32	0.00358805	0.00463595	0.00261706
ACTR1A	2.72414	3.09818		ADAM8	0.645087	0.646998	0.443122
ACTR1B	4.9057	6.00761		ADAM9	2.11803	2.09963	1.86359
ACTR2	4.76295	5.61434		ADAMTS13	0.0113383	0.021364	0.0155061
ACTR3	6.21143	5.97975		ADAMTS14	1.75903	1.69828	1.26849
ACTR3B	0.221639	0.192756		ADAMTS20	0.00579388	0.00485203	0.00586939
ACTR3C	0.159074	0.145867		ADAMTS3	0.375624	0.349593	0.28916
ACTR3P2	0.328963	0		ADAMTS4	0.467355	0.354107	0.149924
ACTR5	1.50662	1.46666		ADAMTS6	0.0616987	0.0656064	0.0723247
ACTR6	1.02061	0.992902		ADAMTS9	0.00666764	0.000797678	0.00405272
ACTR8	2.42561	2.25662		ADAMTSL4	30.9136	30.8371	31.0377
ACVR1	0.106023	0.0818472		ADAMTSL4-AS1	0.20013	0.233893	0.751229
ACVR1B	0.449529	0.54983		ADAMTSL5	1.1901	1.23334	1.24781
ACVR1C	0.0047251	0.0159878		ADAP1	2.48018e-13	0.0260987	0.0230073
ACVR2A	0.0865623	0.0495324		ADAR	11.36	10.9076	10.0607
ACVR2B	3.26217	3.18423		ADARB1	0.181439	0.183654	0.159325
ACVR2B-AS1	0.317886	0.174144		ADAT1	1.68099	1.66431	1.01293
ACVRL1	0.0586391	0.0307065		ADAT2	3.30389	3.32545	2.97882
ACY1	20.2369	24.7105		ADAT3	0.792547	1.25087	1.24072
ACYP1	1.04923	1.50465		ADCK1	0.170363	0.131459	0.147558
ACYP2	0.01123	0.00546145		ADCK2	2.69964	2.49402	2.43642
ADA	0.16117	0.295836		ADCK5	0.868463	0.90778	0.606856
ADA2	0	0		ADCY1	0.0025712	0.00645967	0.00390705
ADAL	1.42028	1.13352		ADCY10	0.015834	0.0196715	0.00555243
ADAM10	0.857069	0.841115		ADCY10P1	0.0385322	0.0345299	0.0380107
ADAM11	0.0271341	0.025503		ADCY3	0.741573	0.787576	0.691765
ADAM15	6.57566	9.07804		ADCY4	0.0305006	0.0889039	0.0486644
ADAM17	1.13319	1.20103		ADCY6	0.00557665	0.0540399	0.0203376
ADAM19	0.0133827	0.0153095		ADCY7	4.05574	4.0022	2.87918
ADAM1A	2.31745e-05	4.98228e-18		ADCY9	0.012529	0.0118038	0.00856728
ADAM1B	0.172294	0		ADD1	4.41095	4.25189	4.46574
ADAM20	0.00816689	0.00614077		ADD2	1.02634	0.751553	1.35541
ADAM20P1	1.60648e-44	0		ADD3	2.15652	2.09082	2.0063
ADAM21	0.00397715	0.00358855		ADD3-AS1	0.0130903	0.00402699	0.00511492
ADAM22	0.00141042	0.00462769		ADGRA2	0.0315495	0.0724686	0.0816925
ADAM32	0.001162	0.00152901		ADGRA3	0.0112005	0.00723583	0.00539589
ADAM8	0.600984	0.492234		ADGRB2	0.0473188	0.0254743	0.0184894
ADAM9	0.835063	0.764843		ADGRB3	0.0128479	0.0145616	0.00986426
ADAMTS1	0	0		ADGRD1	0.0864549	0.0725637	0.0763408
ADAMTS10	0.00903957	0.0101954		ADGRE2	0.31127	0.396798	0.235857
ADAMTS13	0.000764987	0.000862803		ADGRE5	3.61651	3.59824	2.67204
ADAMTS14	1.23799	1.49656		ADGRF3	0.009912	0.0106723	0.0454187
ADAMTS17	0.00269668	0		ADGRG1	0.0139471	0.0100113	0.0148353
ADAMTS20	0.000868689	0.000195953		ADGRG3	0.0302538	0.0260596	0.0386165
ADAMTS3	0.196837	0.213839		ADGRL1	0.613892	0.61629	0.561193
ADAMTS4	0.322329	0.345103		ADGRL1-AS1	0.168388	0.153102	0.191911
ADAMTS5	0	0		ADGRL3	0.000872539	0.000156578	0.00185621
ADAMTS6	0.019547	0.0171472		ADGRV1	0.815643	0.896827	0.726048
ADAMTS7	0	0.0014874		ADH5	29.8363	29.3713	25.7068
ADAMTS9	0.00119963	0.000225504		ADH5P4	5.29137	5.20185	13.9485
ADAMTSL3	0.000446641	0.000201501		ADI1	4.58523	4.45936	4.07966
ADAMTSL4	9.48287	10.9079		ADIPOR1	22.3826	22.1629	25.0444
ADAMTSL4-AS1	1.30956	0		ADIPOR2	2.18628	2.17819	1.84444
ADAMTSL4-AS2	0.0564097	0		ADK	0.183265	0.179988	0.177637
ADAMTSL5	0.786896	0.719973		ADM	0.988514	1.12347	0.951326
ADAP1	0.00898801	0.0136748		ADM2	5.65684	6.31532	4.15928
ADAP2	0.00975636	0		ADM5	3.07646	4.71846	2.85107
ADAR	6.41722	7.16487		ADNP	3.43816	3.35271	3.07167
ADARB1	0.0886812	0.0982389		ADNP2	3.96444	3.63617	3.88832
ADAT1	1.43305	1.26888		ADNP-AS1	0.0270419	0.00970543	0.156148
ADAT2	2.10606	1.80349		ADO	23.3293	24.0586	19.9387
ADAT3	1.69965	1.7093		ADORA2A	0.0411953	0.0056386	0.0142525
ADCK1	0.0347383	0.0414848		ADORA2B	0.842407	0.893556	0.771849
ADCK2	1.16574	1.31512		ADPGK	3.59181	3.2546	2.77419
ADCK5	1.10517	1.25999		ADPGK-AS1	0.00830999	0.00894744	0.0952991
ADCY1	0.000231303	0		ADPRH	0.454388	0.360495	0.414278
ADCY10	0.0190653	0.00593188		ADPRHL1	0.0544693	0.0458981	0.0194326
ADCY10P1	0.0207719	0.0136663		ADPRM	1.28917	1.17149	1.39211
ADCY3	0.780652	0.910581		ADPRS	11.5753	10.3633	7.59763
ADCY4	0.0246943	0.00232099		ADRA2C	0.644568	0.757104	0.480822
ADCY5	0.00144616	0		ADRM1	18.1245	18.7433	18.7549
ADCY6	0.112876	0.0611084		ADSL	6.57012	6.55863	5.56167
ADCY7	2.02263	2.74484		ADSS1	0.61915	0.476174	0.468734
ADCY9	0.00169065	0.00738895		ADSS2	4.28786	3.7935	4.63062
ADD1	2.57859	3.20985		ADTRP	0.68685	0.707698	0.600136
ADD2	0.830096	0.997467		AEBP1	0.187438	0.255634	0.113929
ADD3	0.635706	0.554222		AEBP2	0.144308	0.11675	0.136715
ADD3-AS1	0.00354871	0.00113843		AEN	9.75268	10.1868	7.29636
ADGRA2	0.0534697	0.0140847		AFAP1	0.0147966	0.00986247	0.0138761
ADGRA3	0	0.00227286		AFAP1-AS1	3.28815	2.92635	2.84988
ADGRB1	0.000360523	0		AFDN	4.34314	4.33235	3.9421
ADGRB2	0.0191554	0.0123456		AFDN-DT	0.704832	0.496203	0.568468
ADGRB3	0.0234961	0.0237216		AFF1	1.55793	1.42389	1.45829
ADGRD1	0.0690782	0.105884		AFF4	3.02856	2.59251	3.12797
ADGRD1-AS1	0.035904	0.0911134		AFG1L	0.122833	0.11209	0.103955
ADGRE1	0.00325735	0.00514339		AFG3L1P	0.992937	1.02262	0.846248
ADGRE2	0.562625	0.454781		AFG3L2	10.1942	9.9484	8.70632
ADGRE5	2.87037	2.92984		AFG3L2P1	0.0724237	0	0.990462
ADGRF3	0.175277	0.00201138		AFMID	4.69768	3.97899	4.67135
ADGRF5P1	0	0		AFP	0.387583	0.428296	0.344071
ADGRG1	0	0		AFTPH	1.98863	1.825	2.14013
ADGRG3	0	0.00368353		AGA	3.17456	2.91126	2.75461
ADGRG5	0.00913486	0.000792531		AGAP1	0.146151	0.144643	0.112623
ADGRG6	0.00143168	0.000807371		AGAP10P	0.111161	0.13669	0.0151228
ADGRL1	0.779903	0.7634		AGAP11	0.43059	0.242018	0.0811708
ADGRL1-AS1	0.0609526	0.101371		AGAP12P	0.0393262	0.0383062	0.132716
ADGRL3	0	0.000398383		AGAP14P	0.0993245	0.0818046	0.0315746
ADGRV1	0.638939	0.549537		AGAP2	0.0347021	0.0373641	0.0481054
ADH5	12.5236	13.0741		AGAP3	3.46408	3.36385	3.18216
ADH5P4	11.0248	0.420161		AGAP4	1.0502	0.943447	0.81888
ADH6	0.0632085	0		AGAP5	0.348822	0.395976	0.221286
ADHFE1	0.00283877	0.00106725		AGAP6	1.30311	1.43022	1.59407
ADI1	3.09959	2.73873		AGAP7P	0.0145596	0.0627683	0.0433396
ADIPOR1	11.0911	13.4946		AGAP9	0.461056	0.605473	0.513849
ADIPOR2	0.868519	0.854165		AGBL2	0.0160179	0.012319	0.0208628
ADIRF-AS1	0	0.0130266		AGBL3	0.0173981	0.0127723	0.0223515
ADK	0.148334	0.135563		AGBL5	3.95806	3.84814	4.16146
ADM	0.014821	0		AGER	1.75065	2.00787	2.22068
ADM2	1.42816	1.57903		AGFG1	2.12885	2.25821	2.18143
ADM5	1.75887	2.14398		AGFG2	1.01643	1.02807	0.537571
ADNP	1.58913	1.66347		AGGF1	2.91305	3.01155	1.507
ADNP2	1.93449	1.9269		AGGF1P1	0.345825	0.377394	0.123574
ADNP-AS1	0.0364901	0.00274373		AGGF1P2	0.44776	0.197933	0.596957
ADO	21.8392	23.7531		AGK	1.78813	1.62909	1.67284
ADORA2A	0.0822935	0.00968968		AGL	2.97962	2.9861	2.73714
ADORA2B	0.568369	0.781943		AGMO	0.00141204	0.000380088	0.00193109
ADPGK	2.62618	2.78384		AGO1	4.65528	5.2659	3.82064
ADPGK-AS1	0.241433	0.0480595		AGO2	2.46456	2.65244	2.68456
ADPRH	0.141992	0.141949		AGO3	0.932973	0.923093	0.828449
ADPRHL1	0.00383479	0.0115337		AGO4	2.04549	1.76688	1.73189
ADPRM	0.3874	0.289435		AGPAT1	18.497	19.3457	19.8929
ADPRS	12.4683	15.0418		AGPAT2	2.72938	2.70825	3.1065
ADRA1D	0.0240483	0.016274		AGPAT3	1.91989	1.93684	1.66099
ADRA2C	0.0948843	0.535084		AGPAT4	0.458115	0.515201	0.455647
ADRB1	0.113389	0.10231		AGPAT5	4.95159	5.10776	4.09826
ADRB2	0.0342363	0.19307		AGPS	2.39426	2.51796	2.28847
ADRM1	45.8663	49.7038		AGRN	7.36318	7.66456	5.83693
ADSL	5.46762	4.66943		AGT	0	0	0.0295368
ADSS1	0.317778	0.218749		AGTPBP1	0.305016	0.310129	0.242363
ADSS2	2.86757	2.69717		AGTRAP	4.63831	4.79581	3.48882
ADTRP	0.153224	0.147289		AHCTF1	5.49862	5.35205	5.08758
AEBP1	0.0134895	0.0418393		AHCTF1P1	8.37481	8.02775	7.56287
AEBP2	0.0761504	0.0625751		AHCY	19.1879	18.0697	19.0397
AEN	12.8392	14.5513		AHCYL1	11.4189	10.4998	10.2023
AFAP1	0.0109365	0.00557625		AHCYL2	0.137522	0.164151	0.180982
AFAP1-AS1	1.52035	1.98922		AHDC1	0.730944	0.712805	0.697843
AFAP1L1	0.00720103	0.00487307		AHI1	0.889508	0.876544	0.802794
AFDN	2.42684	2.16859		AHNAK	5.29073	6.32741	5.54088
AFDN-DT	0.134326	0.140277		AHNAK2	0.0372516	0.0534789	0.0452845
AFF1	0.555091	0.594928		AHRR	0.0400779	0.0158172	0.0303252
AFF2	0.000551289	0.000544058		AHSA1	13.2712	15.3082	11.1767
AFF3	5.32586e-05	0.000120137		AHSA2P	11.003	11.3484	9.84335
AFF4	0.961829	0.997604		AHSP	23.1637	21.5949	20.9903
AFF4-DT	1.13409	0.88553		AIDA	2.43048	2.48417	2.58678
AFG1L	0.0567857	0.0563342		AIDAP1	1.59761	0.613185	0.133619
AFG3L1P	0.687405	0.692515		AIF1	1.41477	0.456989	0.45146
AFG3L2	6.52334	5.51051		AIF1L	1.07212	0.824545	0.973121
AFG3L2P1	1.05546	0		AIFM1	4.2939	3.83939	4.50521
AFMID	2.22795	2.91511		AIFM2	0.765099	0.740618	0.771343
AFP	0.0509237	0.0698535		AIFM3	0	0.0169172	0.0716251
AFTPH	0.546217	0.653397		AIG1	0.865142	0.749217	0.871341
AGA	0.924693	0.939637		AIM2	0.0105632	0.00649912	0.0123824
AGAP1	0.115032	0.105914		AIMP1	6.36287	6.20235	5.97887
AGAP10P	0.0272093	0.101165		AIMP2	4.99172	4.45059	2.789
AGAP11	0.560602	0.358626		AIP	4.4337	3.9004	5.0048
AGAP12P	0.0778452	0.0157032		AJM1	3.05601	3.79183	3.37004
AGAP14P	0.06636	0.020352		AJUBA	1.12249	1.06356	0.828958
AGAP1-IT1	0.493353	0.29962		AK1	3.64706	3.66299	3.62111
AGAP2	0.0483203	0.0612645		AK2	13.3414	13.4445	11.3004
AGAP2-AS1	0.0363852	0		AK3	5.28218	5.00604	5.10251
AGAP3	2.63298	3.08437		AK3P3	0.576881	1.8634	1.22724
AGAP4	0.807249	0.973882		AK4	1.75848	1.79081	1.9392
AGAP5	0.18102	0.244018		AK4P1	19.4339	16.7485	13.8254
AGAP6	1.2388	1.05146		AK4P3	2.79229	4.75843	6.46419e-13
AGAP7P	0.0352644	0.0880838		AK6	7.62357	7.36695	7.60387
AGAP9	0.555525	0.46941		AK7	0.136475	0.12575	0.0981069
AGBL1	0	0		AK9	0.0154484	0.0214849	0.0146716
AGBL2	0.029025	0.0181094		AKAP1	2.94775	2.88568	2.57196
AGBL3	0.00512221	0.00240715		AKAP10	0.757041	0.740844	0.679211
AGBL5	2.31188	2.43841		AKAP11	5.92074	5.87191	4.32987
AGER	2.20824	1.03099		AKAP12	0.0624456	0.0602803	0.0441725
AGFG1	0.892557	1.03418		AKAP13	0.0103867	0.0115562	0.00915418
AGFG2	1.00937	1.05808		AKAP17A	9.52037	8.99136	10.6847
AGGF1	2.47248	1.91341		AKAP1-DT	0.193298	0.114469	0.0969294
AGGF1P1	0.132981	0.0282333		AKAP3	0.0532901	0.0409842	0.0347043
AGGF1P2	0	0.0275723		AKAP4	0.1248	0.161248	0.102405
AGK	1.06316	1.30539		AKAP5	0.538807	0.610672	0.323188
AGL	0.718054	0.772418		AKAP6	0.00351615	0.00459712	0.00366374
AGMAT	0.00516121	0		AKAP7	0.0405291	0.043638	0.0314481
AGMO	0.00181012	0.00236392		AKAP8	2.63279	2.36662	2.36075
AGO1	4.62702	4.937		AKAP8L	6.81333	6.59043	6.92828
AGO2	1.98468	2.32626		AKAP9	2.95612	2.74171	2.96319
AGO3	0.647704	0.680356		AKIP1	7.12204	6.45434	6.0119
AGO4	0.669486	0.62106		AKIRIN1	23.2755	24.2801	23.8905
AGPAT1	14.4367	22.3364		AKIRIN2	2.57474	2.16959	2.75572
AGPAT2	4.77587	5.48155		AKNA	2.81432	1.741	2.23163
AGPAT3	1.39333	1.58325		AKR1A1	13.2023	12.6434	12.6456
AGPAT4	0.248945	0.244363		AKR1B1	0.256437	0.227383	0.151283
AGPAT5	2.4458	2.35931		AKR1C1	16.7032	15.6032	16.5842
AGPS	1.96711	1.73186		AKR1C2	3.33834	3.13031	4.01404
AGRN	5.46475	6.33195		AKR1C3	0.700283	0.581735	0.779176
AGT	0.0342472	0		AKR1C7P	0.00960167	0.0620292	0.0875412
AGTPBP1	0.0842562	0.0711729		AKR1E2	0.214073	0.286439	0.225495
AGTRAP	4.41438	5.65357		AKR7A2	18.5905	17.6636	16.7787
AHCTF1	3.45768	3.38072		AKR7A2P1	0	0	4.19847
AHCTF1P1	4.79092	4.85348		AKR7L	0.0310929	0.16739	0.0850449
AHCY	12.2385	13.9262		AKT1	7.40865	7.37815	6.18168
AHCYL1	3.84562	3.84696		AKT1S1	5.63447	6.53336	4.69235
AHCYL2	0.072045	0.0823935		AKT2	4.89738	4.45645	4.69908
AHCYP8	2.53028	0		AKT3	0.0119643	0.0253853	0.0103221
AHDC1	0.336772	0.501843		AKTIP	1.02169	1.12063	0.943377
AHI1	0.485048	0.445714		ALAD	1.95202	1.85396	2.04396
AHNAK	7.62002	8.30136		ALAS1	4.94476	5.26482	5.08882
AHNAK2	0	0.010394		ALAS2	16.4766	14.2099	15.5161
AHR	1.02709e-10	0.000271281		ALB	0.0104791	0.0564149	0.0191083
AHRR	0.0124218	0.0088526		ALCAM	0.00243215	0.00261872	0.00110873
AHSA1	14.1068	15.4749		ALDH16A1	4.44807	4.01804	3.37626
AHSA2P	5.50921	4.08496		ALDH18A1	4.86124	4.41368	4.58571
AHSP	8.91965	6.74977		ALDH1A1	0.849458	0.870265	1.00177
AIDA	1.26759	1.14794		ALDH1A2	1.96616	2.22005	1.85412
AIDAP1	0.154902	1.48711		ALDH1B1	21.9803	20.8523	18.3799
AIDAP2	0.0219883	0		ALDH1L1	0.0405631	0.0596886	0.0308187
AIF1	2.59634	3.91879		ALDH1L2	1.50412	1.38949	1.33557
AIF1L	0.140796	0.141316		ALDH2	1.35456	1.75313	1.40426
AIFM1	3.0509	3.25808		ALDH3B1	0.00616677	0.0464787	0.0449794
AIFM2	0.910312	0.928183		ALDH4A1	2.97431	2.65773	2.70804
AIFM3	0.069965	0.00239125		ALDH5A1	2.81053	2.7761	2.79333
AIG1	0.528251	0.429561		ALDH6A1	3.3438	3.23728	3.07933
AIM2	0.00610878	0.000918652		ALDH9A1	4.4944	4.52782	4.10086
AIMP1	4.48734	3.4014		ALDOA	941.708	872.094	974.34
AIMP2	6.19239	5.58188		ALDOC	208.944	191.774	214.68
AIP	4.26895	4.45796		ALG1	0.658896	0.604432	0.422628
AIRN	0.338758	0		ALG10	8.4862	8.30057	6.33841
AJM1	2.96124	2.59572		ALG10B	3.2381	3.16804	2.63182
AJUBA	0.902745	1.20268		ALG11	1.66093	1.44578	1.22936
AK1	2.63343	2.82044		ALG12	1.46545	1.60806	1.0725
AK2	10.982	11.4835		ALG13	0.632767	0.650865	0.581822
AK2P2	1.70167	0		ALG14	0.086809	0.104628	0.0484328
AK3	4.07401	4.81745		ALG1L	0.0103427	0.00668166	0.0110872
AK3P3	0.62275	0.526784		ALG1L13P	3.34496	3.28423	1.98766
AK3P5	1.46068	0		ALG1L9P	0.00442257	0.00761891	0.00967723
AK4	0.737253	0.657417		ALG2	13.0043	13.8773	11.2657
AK4P1	5.66696	4.91208		ALG3	10.6755	10.6978	11.1948
AK4P3	0.0788066	0.352454		ALG5	1.2962	1.21511	1.04718
AK5	0.00123976	0		ALG6	0.521677	0.617863	0.457587
AK6	3.96439	2.83687		ALG8	3.7744	3.65847	3.12935
AK7	0.0042498	0.00838812		ALG9	1.00962	0.836588	0.991776
AK9	0.00661067	0.00568192		ALKBH1	1.06463	0.972609	1.24517
AKAP1	3.69344	3.97491		ALKBH2	8.91248	7.9042	8.10438
AKAP10	0.24759	0.267701		ALKBH3	0.993278	0.954512	0.778756
AKAP11	1.41854	1.45164		ALKBH4	3.03443	3.34689	2.4465
AKAP12	0.0470714	0.0367043		ALKBH5	10.7079	9.82088	9.72713
AKAP13	0.00569972	0.00505851		ALKBH6	6.83603	7.24546	5.75918
AKAP17A	6.89989	6.25148		ALKBH7	23.645	21.8777	23.6425
AKAP1-DT	0.0130417	0.0235349		ALKBH8	0.64028	0.60213	0.467378
AKAP3	0.0380091	0.0254898		ALMS1	0.556792	0.566771	0.493057
AKAP4	0.0370489	0.0113962		ALMS1-IT1	3.75676	3.4382	3.25389
AKAP5	0.512769	0.289167		ALOX12	0.164965	0.252407	0.225837
AKAP6	0.00250789	0.00168185		ALOX12-AS1	0.0585877	0.0450585	0.04788
AKAP7	0.0097743	0.00918675		ALOX5	0.10826	0.0974557	0.0809047
AKAP8	3.71355	3.76873		ALPK1	0.111338	0.0647517	0.082986
AKAP8L	5.1632	5.96911		ALPK3	0.0295752	0.041642	0.0248904
AKAP8P1	0.408704	0		ALS2	1.26519	1.29674	1.37113
AKAP9	1.60208	1.26595		ALS2CL	0.0155018	0.0333818	0.0188446
AKIP1	2.97364	3.77962		ALX4	0.0179835	0.0359599	0.023423
AKIRIN1	12.6771	12.1793		ALYREF	55.0273	53.1298	52.4041
AKIRIN2	1.41869	1.52484		AMACR	0.540825	0.596462	0.302424
AKNA	0.522173	0.558623		AMBRA1	0.727816	0.678652	0.742472
AKR1A1	4.87375	5.42519		AMD1	15.035	16.365	13.5001
AKR1B1	0.142484	0.146929		AMD1P3	0.169823	0.39151	0.553655
AKR1B1P3	0.117207	0.132194		AMDHD2	4.04771	3.68975	2.90867
AKR1C1	3.41445	3.82533		AMER1	0.91149	1.08155	0.746232
AKR1C2	0.864588	0.585425		AMFR	14.8215	13.4722	14.601
AKR1C3	0.0584064	0.0800586		AMH	9.46655	10.1927	6.77844
AKR1C7P	0.018139	0.0233809		AMHR2	8.00265	8.82754	12.7312
AKR1E2	0.189587	0.175871		AMIGO1	0.367367	0.420269	0.376806
AKR7A2	11.8794	14.325		AMIGO2	11.2882	11.4107	8.01992
AKR7A2P1	4.66983	0		AMIGO3	0.227694	0.335149	0.153933
AKR7A3	0.157417	0.0815173		AMMECR1	1.32955	1.24222	1.10248
AKR7L	0.10778	0.0993746		AMMECR1L	3.35699	2.7961	3.06086
AKT1	8.49375	8.58314		AMN1	0.55275	0.569068	0.473447
AKT1S1	6.19576	7.68068		AMOTL1	2.01588	2.00178	1.58809
AKT2	3.37103	3.82945		AMPD2	7.19758	7.43074	6.88343
AKT3	0.00209241	0.000535555		AMPD3	0.329993	0.352546	0.266397
AKTIP	0.409761	0.316802		AMT	0.401533	0.241306	0.519659
ALAD	1.05822	1.23504		AMY2B	0.00992984	0.0456449	0.0135795
ALAS1	2.05583	2.88099		AMZ1	0.0146335	0.0214856	0.0157676
ALAS2	2.30742	2.61839		AMZ2	1.62475	1.63607	1.42195
ALCAM	0.00114867	0.00185078		AMZ2P1	1.37202	0.761479	1.08327
ALDH16A1	5.39929	4.74856		ANAPC1	1.30555	1.31308	1.13476
ALDH18A1	3.04888	3.14233		ANAPC10	0.195491	0.177809	0.215631
ALDH1A1	0.239027	0.21165		ANAPC11	12.1275	12.2223	11.7924
ALDH1A2	1.02887	1.03868		ANAPC13	10.7123	10.6491	10.2786
ALDH1A3	0	0		ANAPC15	7.9964	7.75096	5.9715
ALDH1B1	12.2976	17.913		ANAPC16	22.8609	20.3299	21.4818
ALDH1L1	0.00839275	0.00823122		ANAPC1P1	0.0156583	0.0166273	0.00878626
ALDH1L2	0.352248	0.299471		ANAPC1P2	0.101691	0.000189048	0.000965369
ALDH2	0.609708	0.635067		ANAPC1P2	0.360851	0.356507	0.404097
ALDH3A2	0.000915849	0.00103296		ANAPC2	2.77108	2.89384	2.44198
ALDH3B1	0.029957	0.0300333		ANAPC4	2.20773	2.33707	2.07778
ALDH4A1	2.38496	2.35087		ANAPC5	5.7007	5.52601	5.20893
ALDH5A1	1.04402	1.29241		ANAPC7	10.9519	10.3094	9.14023
ALDH6A1	0.494816	0.553888		ANG	0.0345206	0.0650451	0.0437234
ALDH8A1	0.00526523	0.00356308		ANGEL1	1.2537	1.17791	1.07224
ALDH9A1	1.84573	1.90465		ANGEL2	3.7465	4.01648	3.01278
ALDOA	268.918	337.56		ANGPT1	0.555783	0.430838	0.532011
ALDOC	32.489	34.2732		ANGPTL4	0.20739	0.27292	0.084037
ALG1	0.872266	0.931114		ANGPTL6	0.0987781	0.21271	0.0925905
ALG10	1.82887	2.26412		ANK1	2.55006	2.4956	2.18083
ALG10B	0.536781	0.491758		ANK2	0.00112756	0.000242812	0.00102803
ALG11	0.762214	0.715264		ANK3	0.114829	0.0993378	0.099897
ALG12	0.84737	1.33178		ANKAR	0.0117539	0.0126556	0.0133955
ALG13	0.423291	0.422913		ANKDD1A	0.00545771	0.00881454	0.0174158
ALG14	0.0681855	0.0627064		ANKEF1	0.306037	0.342846	0.191929
ALG1L	0.00150936	0.00251855		ANKFN1	0.00482797	0.00194937	0.00550225
ALG1L13P	1.70069	1.84345		ANKFY1	0.958499	0.977128	0.951752
ALG1L2	0.0241454	0		ANKH	0.0741725	0.0938587	0.0885402
ALG1L9P	0.0190629	0.00107693		ANKHD1	1.94186	1.83109	2.13861
ALG1L9P	0.166007	0		ANKHD1-EIF4EBP3	0.283389	0.177773	0.201092
ALG2	6.65696	8.38152		ANKIB1	0.79119	0.80323	0.757305
ALG3	12.4276	12.3973		ANKLE1	1.23385	1.28255	0.83401
ALG3P1	0	0		ANKLE2	5.9958	5.48323	5.67141
ALG5	0.969757	0.974177		ANKMY1	0.231794	0.278666	0.154546
ALG6	0.321873	0.39205		ANKMY2	3.85223	3.85205	3.25424
ALG8	1.68582	1.71501		ANKRA2	3.0315	2.84584	1.91599
ALG9	0.253911	0.455236		ANKRD10	3.01643	3.42094	3.79862
ALG9-IT1	0.014359	0		ANKRD10-IT1	2.33738	2.03154	3.28645
ALKBH1	0.467255	0.582647		ANKRD11	1.45194	1.27064	0.901533
ALKBH2	7.87415	8.86668		ANKRD11P2	1.41424	0.909927	0.791151
ALKBH3	1.02684	1.04884		ANKRD12	1.19278	1.16218	1.00275
ALKBH4	3.75021	6.18612		ANKRD13A	4.14724	3.63192	4.01975
ALKBH5	7.28229	8.22919		ANKRD13B	0.868487	0.918607	0.829087
ALKBH6	7.08693	7.56605		ANKRD13C	0.712195	0.749595	0.722286
ALKBH7	24.5857	30.2124		ANKRD13D	3.69899	4.0453	3.43428
ALKBH8	0.487769	0.428022		ANKRD16	0.559637	0.554005	0.328156
ALMS1	0.514132	0.458603		ANKRD17	2.81018	2.63353	2.57466
ALMS1-IT1	1.38139	1.68667		ANKRD18B	0.110307	0.0933182	0.0694413
ALOX12	0.0667327	0.0554987		ANKRD18CP	0.015796	0.0212596	0.0144017
ALOX12-AS1	0.0629506	0.0393464		ANKRD18DP	0.291053	0.379088	0.188321
ALOX12P2	0.0137496	0.000775384		ANKRD18EP	0	0	3.62683
ALOX5	0.0392753	0.0351137		ANKRD20A1	0.0700069	0.0250748	0.0536219
ALOX5AP	0	0		ANKRD20A11P	0.0396397	0.0517092	0.0390628
ALPK1	0.0837822	0.0702528		ANKRD20A17P	3.34246	3.31427	5.02661
ALPK3	0.0135075	0.0159271		ANKRD20A19P	0.10602	0.133178	0.128882
ALPL	0.00449372	0.00394202		ANKRD20A21P	0.128089	0.119458	0.132654
ALS2	0.59406	0.545608		ANKRD20A2P	0.0460392	0.00536668	0.0287222
ALS2CL	0.0139453	0.00314569		ANKRD20A3P	0.0212762	0.0202858	0.054037
ALX3	0.156563	0		ANKRD20A4P	0.0331484	0.0276495	0.00908695
ALX4	0.133121	0.0735071		ANKRD20A7P	0.00648711	0.00590766	0.00585434
ALYREF	100.986	96.6031		ANKRD20A8P	0.0259617	0.00958968	0.0291195
AMACR	0.295834	0.324945		ANKRD23	0.30486	0.283663	0.293059
AMBRA1	0.334981	0.337124		ANKRD24	0.0184776	0.0132633	0.0168465
AMD1	10.3492	10.2184		ANKRD26	0.846505	0.738915	0.630289
AMD1P3	0.414741	8.23465e-05		ANKRD26P1	0.0063997	0.00826874	0.00583479
AMDHD1	0	0.00459216		ANKRD27	3.6945	3.47528	4.52827
AMDHD2	6.9307	5.658		ANKRD28	1.0677	0.953951	0.84708
AMELX	0.056267	0		ANKRD31	0.00605718	0.00733704	0.00828375
AMER1	1.32869	1.73639		ANKRD33	0.411992	0.406629	0.813853
AMFR	3.57498	4.17068		ANKRD33B	0.151182	0.225837	0.176331
AMH	6.86684	5.21479		ANKRD34A	0.944879	0.883497	0.430737
AMHR2	1.68812	2.23705		ANKRD36	0.331922	0.387952	0.306079
AMIGO1	0.520507	0.580074		ANKRD36B	0.244783	0.362595	0.288131
AMIGO2	3.01277	2.69578		ANKRD36C	0.263722	0.265535	0.248118
AMIGO3	0.132394	0.0621647		ANKRD37	5.26471	5.25088	4.91678
AMMECR1	0.446464	0.509708		ANKRD39	1.95188	1.58675	2.42274
AMMECR1L	1.37195	1.45157		ANKRD40	8.51104	8.17372	7.97526
AMN	0.0157576	0.0106635		ANKRD42	0.369038	0.371489	0.299268
AMN1	0.0930766	0.117976		ANKRD45	0.0143997	0.0120561	0.0100881
AMOT	0	0		ANKRD46	1.06351	1.01379	0.912071
AMOTL1	1.14369	1.11565		ANKRD49	10.2603	9.62342	8.66855
AMPD2	6.29078	6.83574		ANKRD49P1	1.96711	2.118	2.77172
AMPD3	0.186244	0.222931		ANKRD50	1.80962	1.6491	1.82921
AMPH	0.00208658	0		ANKRD52	4.34959	4.56966	4.65016
AMT	0.0797225	0.0393497		ANKRD54	3.03432	2.27727	2.79161
AMY2B	3.03081e-08	0.00396563		ANKRD55	0.0458567	0.0349734	0.0270015
AMZ1	0.0204644	0.0206515		ANKRD6	0.00254497	0.00274019	0.00651864
AMZ2	0.607353	0.686789		ANKRD61	0	0	1.34919
AMZ2P1	0.308016	0.447763		ANKRD62	0.0142178	0.0382711	0.0129628
ANAPC1	1.15001	1.31825		ANKRD63	0.816214	1.05459	0.347277
ANAPC10	0.110934	0.0858649		ANKRD9	11.7463	11.107	11.3556
ANAPC10P1	0.867668	0.139802		ANKS1A	0.338548	0.333234	0.287356
ANAPC11	11.8285	12.5258		ANKS3	1.11603	1.23069	1.10052
ANAPC13	5.89018	6.09003		ANKS6	2.61837	3.00352	2.00414
ANAPC15	6.99579	6.79211		ANKZF1	23.4928	21.8266	23.1745
ANAPC16	4.39083	4.24637		ANLN	5.08768	4.77309	5.57933
ANAPC1P1	0.0244209	0.0123475		ANO10	0.465631	0.433577	0.505077
ANAPC1P2	0.511499	0.455347		ANO5	0.00892159	0.0134483	0.0111553
ANAPC1P4	0.0397124	0.000437594		ANO6	0.868334	0.828597	0.838899
ANAPC2	3.04645	3.26391		ANO7	0.0623368	0.0671186	0.075779
ANAPC4	1.4206	1.16776		ANO7L1	0.147501	0.0567198	0.0960576
ANAPC5	4.33232	4.36046		ANO8	2.70008	2.12722	2.23158
ANAPC7	6.5841	6.38091		ANO9	1.27264	1.43307	1.33918
ANG	0.0372654	0.0105076		ANP32A	6.32644	5.85439	5.34753
ANGEL1	0.518922	0.705772		ANP32B	6.92403	5.99616	7.57681
ANGEL2	2.4019	2.30866		ANP32E	18.44	17.4287	15.4407
ANGPT1	0.303868	0.231869		ANPEP	0.205083	0.256866	0.20606
ANGPT2	0.0653755	0.000609378		ANTKMT	23.2498	25.6488	20.2708
ANGPTL2	0.00585902	0		ANTXR1	0.00216273	0.00756804	0.00246477
ANGPTL4	0.0404227	0.0105211		ANTXR2	1.2523	0.940791	0.812725
ANGPTL6	0.234839	0.195433		ANXA1	95.5899	81.4225	82.3683
ANGPTL7	0.249589	0		ANXA11	8.17924	7.65023	7.93628
ANK1	1.99056	2.38218		ANXA2	11.6615	11.8978	11.9553
ANK2	0.000121722	0		ANXA2P1	1.65464	1.33617	0
ANK3	0.0854674	0.0608371		ANXA2P2	24.0683	28.0595	13.4673
ANKAR	0.00634426	0.00849712		ANXA2R	1.49147	1.18696	1.62587
ANKDD1A	0.0139927	0.00747562		ANXA3	0.202274	0.121775	0.222096
ANKDD1B	0.0024407	0.0038539		ANXA4	0.0901598	0.0940657	0.0987689
ANKEF1	0.116489	0.134077		ANXA5	11.0981	11.3768	12.2302
ANKFN1	0.00010858	0.000796016		ANXA6	0.548044	0.664748	0.462957
ANKFY1	0.524595	0.648302		ANXA7	13.3397	12.0558	12.2398
ANKH	0.0664499	0.0402664		ANXA9	0.696314	0.492972	0.55658
ANKHD1	1.18929	1.43912		AOC2	0.31254	0.246777	0.227961
ANKHD1-EIF4EBP3	0.29321	0.166848		AOC3	0.220555	0.138526	0.083786
ANKIB1	0.340638	0.382623		AOPEP	0.0874927	0.091153	0.0704039
ANKLE1	1.85117	2.58337		AP1AR	1.34871	1.28602	1.01018
ANKLE2	3.66691	4.07265		AP1B1	3.37739	2.99992	3.15385
ANKMY1	0.234508	0.178335		AP1G1	3.26523	3.49342	3.05146
ANKMY2	2.21922	2.10791		AP1G2	6.76993	6.88519	6.80925
ANKRA2	1.14048	0.963116		AP1M1	2.7023	2.40605	2.63335
ANKRD10	2.2913	1.74589		AP1M2	0.0348742	0.103261	0.0874384
ANKRD10-IT1	0.684008	0.565745		AP1S1	12.9095	12.8024	11.9657
ANKRD11	0.871579	0.972053		AP1S2	2.45044	2.23083	2.35867
ANKRD11P2	1.85895	1.18955		AP1S3	0.0649931	0.0636799	0.0512567
ANKRD12	0.510894	0.471287		AP2A1	10.4435	10.0348	10.434
ANKRD13A	3.31575	2.72393		AP2A2	1.21468	1.12844	1.19275
ANKRD13B	1.38563	1.53482		AP2B1	4.96812	4.60514	4.9759
ANKRD13C	0.639963	0.609345		AP2M1	56.4476	53.8766	51.1806
ANKRD13D	2.87984	3.48092		AP2S1	14.6357	13.779	13.7467
ANKRD16	0.799017	0.911474		AP3B1	0.687815	0.623508	0.643042
ANKRD17	1.66549	1.79334		AP3B2	0.0477254	0.0270455	0.0412225
ANKRD18B	0.0430752	0.0455673		AP3D1	5.14706	4.9117	4.81744
ANKRD18CP	0.00373012	0.00240404		AP3M1	14.2969	12.9441	15.3206
ANKRD18DP	0.316729	0.278638		AP3M2	5.30421	5.10916	4.45682
ANKRD18EP	1.93765	0		AP3S1	1.99388	1.80358	1.87408
ANKRD19P	1.67689e-20	0		AP3S2	1.57858	1.35059	1.18248
ANKRD20A1	0.0475883	0.0182916		AP4B1	5.48638	4.5959	4.83257
ANKRD20A11P	0.0252859	0.0208409		AP4B1-AS1	0	0	0.101866
ANKRD20A17P	0.417506	0.285512		AP4E1	0.696042	0.593893	0.553181
ANKRD20A19P	0.419648	0.365737		AP4M1	4.86232	4.14136	4.1815
ANKRD20A21P	0.0305261	0.0349155		AP4S1	0.192928	0.15969	0.134243
ANKRD20A2P	3.38737e-06	0.0243386		AP5B1	15.7282	16.0025	12.5967
ANKRD20A3P	0.0456607	0.0337068		AP5M1	2.916	3.5039	2.11985
ANKRD20A4P	0.00580418	1.08378e-22		AP5S1	2.28801	2.66192	1.90404
ANKRD20A5P	0.00801982	0		AP5Z1	3.96312	3.68158	4.14629
ANKRD20A7P	0.00742959	0.000322555		APAF1	1.50992	1.30547	1.35228
ANKRD20A8P	0.0525203	0.0207758		APBA2	0.429191	0.39215	0.371391
ANKRD20A9P	0.00498951	0.00422063		APBA3	3.21517	2.51767	2.50718
ANKRD23	0.204707	0.227918		APBB1	0.0735895	0.0735749	0.110225
ANKRD24	0.000831114	0.00374954		APBB2	0.0119304	0.0135217	0.00973232
ANKRD26	0.288558	0.244474		APBB3	4.4495	4.00994	4.47463
ANKRD27	2.12398	2.45321		APC	1.48903	1.48435	1.1386
ANKRD28	0.731818	0.649375		APC2	0.018956	0.0255126	0.195338
ANKRD30A	0.00289922	0		APEH	25.2982	24.5604	22.9013
ANKRD31	0.000817349	0.00230465		APEX1	62.4567	57.5042	57.2595
ANKRD33	0.00926562	0		APEX2	7.10738	5.26509	7.0423
ANKRD33B	0.0492547	0.0406281		APH1A	38.9888	41.5524	33.0857
ANKRD34A	0.301976	0.620628		APH1B	1.72383	2.10935	1.05481
ANKRD35	0.0232022	0.016104		API5	13.0791	13.2761	11.692
ANKRD36	0.537302	0.438514		APIP	2.46949	2.32439	2.22351
ANKRD36B	0.441697	0.303714		APLF	0.0373015	0.0387173	0.0331857
ANKRD36BP1	0.488194	0		APLNR	3.31508	4.80927	1.62258
ANKRD36BP2	0.0523707	0		APLP1	0.440138	0.358315	0.342562
ANKRD36C	0.435002	0.253321		APLP2	8.41566	8.6237	7.57714
ANKRD37	1.36617	0.472317		APMAP	1.60101	1.44267	1.38531
ANKRD39	1.82645	2.1244		APOBEC3B	6.4196	5.51051	5.21696
ANKRD40	4.35017	4.54221		APOBEC3C	28.2763	23.7474	24.921
ANKRD42	0.33233	0.332646		APOBEC3D	2.18656	2.26199	1.79832
ANKRD44	0	0.000451712		APOBEC3F	0.502008	0.394191	0.452275
ANKRD45	1.20994e-08	0.00694964		APOBEC3G	2.75028	2.67218	2.11083
ANKRD46	0.238829	0.262882		APOBR	0.472026	0.667058	0.268975
ANKRD49	3.85201	4.29596		APOC1	15.9885	17.8077	17.4955
ANKRD49P1	0.57914	1.19752		APOC1P1	0.167161	0.179984	0.152405
ANKRD50	0.94773	0.918036		APOD	0.016659	0.0538107	0.030377
ANKRD52	4.11102	4.86143		APOE	20.306	29.6476	18.4489
ANKRD53	0.0338781	0.0436685		APOF	0	0.0600338	0.50835
ANKRD54	2.21742	2.44472		APOL1	2.1722	2.14868	1.50547
ANKRD55	0.0520811	0.0447822		APOL2	3.2232	2.96037	2.2273
ANKRD6	0.000343415	0		APOL3	0.138313	0.154242	0.0720596
ANKRD61	0.386056	0		APOL4	3.69637	3.55131	3.11825
ANKRD62	0.0479634	0.0270481		APOL6	1.6377	1.45337	1.22484
ANKRD63	1.09405	1.49066		APOLD1	0.0640219	0.0627963	0.0316295
ANKRD9	8.6102	7.35887		APOM	1.983	1.85043	1.39555
ANKS1A	0.207961	0.261852		APOO	0.792606	0.774148	0.721081
ANKS3	1.2621	1.10943		APOOL	0.849411	0.817731	0.829101
ANKS6	2.19973	2.47444		APPBP2	1.19868	1.14171	0.993396
ANKZF1	10.2872	9.11186		APPL1	1.83491	1.74644	1.76998
ANLN	2.32542	2.33844		APPL2	0.527725	0.546352	0.412672
ANO1	0.000309806	0		APRT	100.319	96.0069	94.1064
ANO10	0.20364	0.197824		APTR	0.608503	0.65518	0.597001
ANO2	0.000997929	0		APTX	0.671734	0.665905	0.478894
ANO3	0.000581034	0.000655329		AQP1	0.672754	0.674057	0.536698
ANO5	0.0046779	0.00325873		AQP10	6.29976	5.48481	6.15589
ANO6	0.259062	0.307366		AQP11	0.04872	0.039343	0.172125
ANO7	0.090659	0.0917099		AQP3	4.10346	4.07673	2.90985
ANO7L1	0.0312771	0		AQR	2.82513	2.66187	2.481
ANO8	0.758313	0.868639		ARAF	9.78139	9.17032	11.4955
ANO9	0.516618	0.514885		ARAP1	1.61336	1.66224	1.4048
ANOS2P	0	0		ARAP1-AS2	0	0	0.650865
ANP32A	5.4344	6.05412		ARAP2	0.00215467	0.00371192	0.00157158
ANP32AP1	0.00368206	0		ARAP3	0.748471	0.762969	0.423978
ANP32B	3.8356	3.39738		ARC	1.33972	1.72298	1.62862
ANP32E	10.2229	10.7326		ARCN1	22.687	19.1122	23.3282
ANPEP	0.119731	0.165616		AREG	3.94563	2.96683	2.66557
ANTKMT	64.0488	73.9205		AREL1	1.34784	1.31532	1.05526
ANTXR1	0.00262652	0.00543101		ARF1	64.3316	58.653	69.3555
ANTXR2	0.912679	0.816947		ARF3	10.4364	10.081	8.57214
ANXA1	25.9804	24.3193		ARF4	9.39396	9.14209	10.3293
ANXA11	5.49357	6.53637		ARF4-AS1	0.263109	0.323762	0.474967
ANXA2	8.03109	7.67891		ARF5	62.182	57.6802	60.2
ANXA2P1	9.40432	0.0839416		ARF6	58.1371	53.5999	56.6385
ANXA2P2	3.84536	19.1657		ARFGAP1	14.5207	13.945	13.7934
ANXA2R	1.47653	1.13496		ARFGAP2	18.904	18.231	16.1075
ANXA3	0.102722	0.115857		ARFGAP3	2.26951	1.96604	2.51892
ANXA4	0.0620563	0.0627581		ARFGEF1	1.65575	1.49127	1.45909
ANXA5	2.42222	2.29713		ARFGEF1-DT	1.03248	1.2352	0.627559
ANXA6	0.338672	0.359508		ARFGEF2	1.85001	1.90703	1.62495
ANXA7	5.16841	4.57099		ARFGEF3	0.00349386	0.00225712	0.00127418
ANXA8	2.06057e-09	0		ARFIP1	0.530909	0.558735	0.473962
ANXA9	0.08495	0.058068		ARFIP2	13.6757	14.1381	15.9966
AOAH	0	0		ARFRP1	11.7288	12.2915	7.74096
AOC2	0.163072	0.298083		ARG2	12.6845	10.8679	12.4253
AOC3	0.0446424	0.0727284		ARGLU1	10.5803	10.5764	11.516
AOC4P	0.0367102	0		ARHGAP1	1.93098	1.90973	1.39952
AOPEP	0.0621378	0.043128		ARHGAP11A	15.529	14.6315	12.5299
AP1AR	0.824592	0.651021		ARHGAP11B	0.640482	0.713156	0.834818
AP1B1	2.97579	3.34771		ARHGAP12	0.837577	0.84059	0.788157
AP1G1	1.5554	1.55262		ARHGAP15	0.0322512	0.0308668	0.0380021
AP1G2	3.71545	3.56848		ARHGAP17	0.322264	0.411241	0.331301
AP1M1	1.76121	1.95809		ARHGAP18	2.01937	1.69326	1.52239
AP1M2	0.0258824	0.00530761		ARHGAP19	4.76836	4.14947	5.15987
AP1M2P1	0	0		ARHGAP21	2.20889	2.31579	1.82866
AP1S1	16.3346	18.559		ARHGAP22	0.076526	0.063432	0.0492826
AP1S2	1.10947	0.956746		ARHGAP23	0.080911	0.0738284	0.0575147
AP1S3	0.0191566	0.0227545		ARHGAP24	0.100932	0.0943415	0.104318
AP2A1	6.23121	7.61796		ARHGAP25	0.339081	0.334279	0.1779
AP2A2	0.400399	0.531684		ARHGAP26	0.00751674	0.00629482	0.00710705
AP2B1	2.63375	3.21837		ARHGAP27	0.217427	0.189998	0.183869
AP2B1P1	0.0862703	0.0278004		ARHGAP27P1-BPTFP1-KPNA2P3	0.205164	0.252314	0.157902
AP2M1	49.3183	51.4166		ARHGAP28	0.0830621	0.105694	0.0698242
AP2S1	16.6991	17.9753		ARHGAP30	0.0110908	0.0417955	0.121342
AP3B1	0.495903	0.455691		ARHGAP33	0.929189	0.67339	0.73963
AP3B2	0.0162695	0.00458746		ARHGAP35	0.972156	0.936035	0.92754
AP3D1	3.44318	3.92811		ARHGAP39	0.16494	0.157859	0.136709
AP3M1	5.35942	5.74817		ARHGAP4	4.00248	4.08871	3.73324
AP3M2	1.90068	2.31805		ARHGAP42	0.129492	0.0856281	0.12072
AP3S1	0.573281	0.614423		ARHGAP44	0.00126328	0.00068009	0.00518294
AP3S2	0.525171	0.569031		ARHGAP45	1.72045	2.13792	1.64167
AP4B1	3.1589	3.11047		ARHGAP5	2.52877	2.4268	2.4611
AP4B1-AS1	0.0308064	0		ARHGAP5-AS1	1.31276	1.19028	0.566943
AP4E1	0.310123	0.36177		ARHGAP6	0.41663	0.412983	0.380064
AP4M1	4.07021	2.9733		ARHGAP8	0.0136102	0.00745731	0.0105547
AP4S1	0.118676	0.0693683		ARHGAP9	0.115718	0.0747566	0.105503
AP5B1	11.1569	13.8572		ARHGDIA	50.8915	47.0912	47.7145
AP5M1	2.00843	1.84296		ARHGDIB	2.20389	1.55638	1.90297
AP5S1	2.42849	2.98673		ARHGDIG	0.44871	0.751536	0.363646
AP5Z1	2.97369	2.61334		ARHGEF1	3.91654	3.82191	3.35771
APAF1	0.578749	0.581185		ARHGEF10	0.121855	0.166357	0.11212
APBA2	0.587543	0.633912		ARHGEF11	0.788645	0.833022	0.666543
APBA3	3.6627	3.45197		ARHGEF12	4.23492	4.18365	3.80345
APBB1	0.0453947	0.0495992		ARHGEF16	0.0965504	0.0831653	0.0704222
APBB1IP	0.000798502	0		ARHGEF18	0.604574	0.604216	0.5644
APBB2	0.007541	0.0075496		ARHGEF19	2.17421	2.28525	1.68337
APBB3	2.66781	2.93545		ARHGEF2	5.64843	5.05896	4.99521
APC	0.821596	0.793871		ARHGEF25	6.67661	7.16717	4.72884
APC2	0.232863	0.0173099		ARHGEF26	0.0065323	0.00602861	0.00255243
APCDD1L-DT	0.0072538	0.000743755		ARHGEF2-AS2	1.21951	0.951969	0.611526
APEH	23.7556	24.7479		ARHGEF3	0.0221324	0.0113291	0.0168708
APEX1	74.202	87.9365		ARHGEF39	2.17163	2.34631	1.6596
APEX2	3.39635	4.4564		ARHGEF40	0.80537	0.880913	0.716796
APH1A	19.7945	24.7483		ARHGEF6	1.24159	1.14381	1.03815
APH1B	0.445449	0.482451		ARHGEF7	0.440127	0.437215	0.444509
API5	7.71389	6.87513		ARID1A	3.20828	2.76288	2.99842
API5P1	0.0921445	0.0257384		ARID1B	0.399707	0.393055	0.401062
API5P2	0.230032	0.103778		ARID2	0.871343	0.800188	0.773535
APIP	1.18471	0.940829		ARID3A	8.54292	7.99232	7.66814
APLF	0.00675863	0.0173583		ARID3B	1.58738	1.74363	1.62092
APLNR	0.480295	0.541709		ARID3BP1	1.31746	0.739263	2.17995
APLP1	0.675038	0.663325		ARID4A	0.674119	0.634646	0.65631
APLP2	4.6943	4.45345		ARID4B	0.901051	0.835779	0.870524
APMAP	1.08914	1.15317		ARID5A	1.2614	1.15055	0.798448
APOA1	0.036815	0		ARID5B	0.107895	0.0647744	0.0751197
APOA1-AS	0.0190457	0		ARIH1	2.32724	2.11253	2.21757
APOBEC2	0.173915	0		ARIH2	4.38073	4.02288	3.59236
APOBEC3B	3.89747	5.02151		ARIH2OS	2.6958	3.03453	2.45784
APOBEC3C	5.61878	6.1396		ARL1	16.2293	15.317	15.313
APOBEC3D	0.766901	1.09059		ARL11	0.285538	0.281821	0.151861
APOBEC3F	0.249687	0.140152		ARL13B	0.872179	0.78257	0.745877
APOBEC3G	1.03599	1.14298		ARL14EP	3.99432	3.47331	3.72642
APOBEC3H	0	0		ARL15	0.164601	0.133726	0.178449
APOBR	3.14727	3.15193		ARL16	8.99797	9.53022	8.64298
APOC1	11.7494	12.1324		ARL17A	1.02931	0.8717	0.99553
APOC1P1	0.090226	0.0424012		ARL17B	0.0676969	0.135091	0.0717577
APOC2	0.0195179	0.0315986		ARL2	16.5407	16.9008	16.41
APOC4-APOC2	4.64421e-12	0.0165959		ARL2BP	14.7849	11.9639	12.8863
APOD	0	0		ARL2-SNX15	0.0796373	0.0861229	0.0555142
APOE	32.2214	34.205		ARL3	0.427002	0.520607	0.440836
APOF	0.210665	0.0169716		ARL4A	163.912	137.369	163.388
APOL1	0.929388	0.811704		ARL4AP5	2.08075	0.507838	3.33978
APOL2	1.56425	1.60311		ARL4C	0.126388	0.204124	0.0288078
APOL3	0.00266627	0.0315755		ARL4D	0.297629	0.384552	0.271357
APOL4	1.20366	1.50593		ARL5A	12.3203	12.6483	11.748
APOL6	0.441979	0.399184		ARL5B	15.9367	16.633	16.0552
APOLD1	0.0271422	0.0440834		ARL6	0.191304	0.217214	0.158561
APOM	0.966385	0.583477		ARL6IP1	64.1997	64.1307	64.3892
APOO	0.380227	0.469489		ARL6IP4	69.5504	64.7286	63.8248
APOOL	0.28125	0.281146		ARL6IP5	3.42806	3.74301	3.45561
APP	0	0.00013375		ARL6IP6	2.52474	2.44349	2.50852
APPBP2	0.409766	0.470579		ARL8A	2.42079	1.98821	2.51508
APPL1	0.549153	0.506834		ARL8B	8.74987	7.8296	8.79112
APPL2	0.232804	0.187816		ARLNC1	0.0163739	0.0216821	0.0308422
APRT	104.541	127.569		ARMC1	7.8554	7.06428	6.54644
APTR	0.431974	0.437883		ARMC10	9.15427	8.04467	7.9394
APTX	0.459952	0.536901		ARMC12	0.074185	0.0342324	0.0676366
AQP1	0.640508	1.64105		ARMC2	0.0172187	0.0119962	0.0166223
AQP10	0.805341	0.688119		ARMC3	0.0103995	0.0124414	0.0200166
AQP11	0.141346	0.0370743		ARMC5	2.82429	3.55532	2.77385
AQP3	5.01286	5.78054		ARMC6	3.76789	3.46045	3.0984
AQP6	0.0242521	0.00390759		ARMC7	1.04931	0.852427	1.0197
AQP7	0	0		ARMC8	0.944379	0.817663	0.775125
AQR	1.52955	1.66881		ARMC9	0.0393856	0.047033	0.0300329
AR	0	0		ARMCX1	0.399586	0.728094	0.252217
ARAF	4.80633	4.41515		ARMCX3	24.2363	22.6904	29.0278
ARAP1	1.26192	1.26581		ARMCX5	9.02211	8.95615	8.14201
ARAP1-AS1	0.0901507	0		ARMCX5-GPRASP2	0.0346645	0.0566405	0.0493781
ARAP1-AS2	0.283789	0		ARMCX5-GPRASP2	0.0328067	5.10814e-10	0.0404725
ARAP2	0.000116299	0.00013117		ARMCX6	12.359	11.0797	14.08
ARAP3	1.03866	1.17282		ARMCX7P	0.0928489	3.73516	0.118467
ARC	0	0.0792931		ARMH4	0.00342308	0.00506778	0.0027807
ARCN1	5.64283	5.8657		ARMT1	8.04999	8.18978	7.84178
AREG	0.506234	0.598528		ARNT	3.32949	2.92619	3.56557
AREL1	0.89552	0.979421		ARNTL	0.0253946	0.0335569	0.0273626
ARF1	34.1934	44.9575		ARNTL2	0.0497273	0.0312327	0.0465971
ARF1P2	0	0.144479		ARPC1A	5.5251	5.26206	4.46858
ARF3	7.97845	9.33019		ARPC1B	19.747	19.2939	17.6596
ARF4	2.44216	2.94623		ARPC2	4.56648	4.33313	3.92878
ARF4-AS1	0.268932	0.24026		ARPC3	27.9673	26.711	24.3872
ARF5	47.8451	57.209		ARPC3P1	1.67689	1.08364	0.873638
ARF6	26.0111	28.0849		ARPC3P3	11.8613	9.51574	30.9585
ARFGAP1	6.35843	6.49736		ARPC4	9.59367	10.2157	7.87081
ARFGAP2	14.9455	15.1738		ARPC4-TTLL3	1.0037	1.00171	0.971007
ARFGAP3	0.449718	0.49776		ARPC5	16.6934	17.0809	14.604
ARFGEF1	0.618704	0.557624		ARPC5L	7.06987	7.0043	4.94625
ARFGEF1-DT	1.08361	0.279353		ARPIN-AP3S2	0.322163	0.325198	0.474839
ARFGEF2	1.16368	1.17253		ARPP19	18.9351	18.311	18.6196
ARFIP1	0.318153	0.283083		ARRB1	0.900615	0.957699	0.676798
ARFIP2	9.36377	9.07442		ARRB2	1.82672	1.94163	1.94305
ARFRP1	11.5603	12.7728		ARRDC1	4.7505	4.88758	4.0304
ARG1	0.00333959	0		ARRDC1-AS1	14.1434	15.036	12.96
ARG2	0.692535	0.621076		ARRDC2	3.9375	3.92158	2.87194
ARGFXP2	0.225011	0		ARRDC3	32.0102	22.1656	38.291
ARGLU1	7.98554	5.82863		ARRDC3-AS1	0.0142959	0.0224967	0.0296097
ARHGAP1	1.02908	1.42813		ARRDC4	8.83892	9.02487	4.25542
ARHGAP10	0.000606823	0.00136883		ARSA	3.10962	3.2467	2.964
ARHGAP11A	7.986	7.97247		ARSB	0.0806886	0.100042	0.0713368
ARHGAP11B	0.602584	0.772393		ARSG	0.0242016	0.0176523	0.0198761
ARHGAP12	0.315903	0.321988		ARSK	0.589872	0.591129	0.59135
ARHGAP15	0.0105363	0.00769272		ART3	0.0326687	0.0297632	0.0504053
ARHGAP17	0.269864	0.266022		ART5	0.50335	0.794876	0.397729
ARHGAP18	0.544468	0.521597		ARV1	8.18231	7.89362	7.06938
ARHGAP19	1.04868	1.0248		ARVCF	2.50861	2.55749	2.14081
ARHGAP19-SLIT1	0.00251201	0.00668689		AS3MT	0.00214887	0.0227639	0.0215377
ARHGAP21	1.35506	1.28469		ASAH1	6.21534	5.96697	7.69256
ARHGAP22	0.272092	0.287286		ASAH2	0.237997	0.2843	0.158428
ARHGAP22-IT1	0.0647114	0.218957		ASAH2B	0.801228	0.711674	0.586855
ARHGAP23	0.0362701	0.022541		ASAP1	0.178039	0.142894	0.177486
ARHGAP23P1	0	0		ASAP2	0.209897	0.227379	0.143828
ARHGAP24	0.0553324	0.049436		ASAP3	2.06094	2.25095	1.83329
ARHGAP25	0.17249	0.219358		ASB1	2.97321	3.14201	2.81573
ARHGAP26	0.000751334	0.00364384		ASB13	1.46429	1.39813	1.03276
ARHGAP27	0.124657	0.18128		ASB14	0	0	0.0573836
ARHGAP27P1-BPTFP1-KPNA2P3	0.059088	0.0675805		ASB16	0	0.0159154	0.160981
ARHGAP28	0.0606395	0.0595508		ASB16-AS1	1.32954	1.04808	0.736559
ARHGAP28-AS1	0.353242	0.0372984		ASB3	0.198452	0.189747	0.205106
ARHGAP30	0.0404077	0.00675178		ASB6	5.51843	5.92356	5.87708
ARHGAP31	0.00272764	0		ASB7	0.980117	1.0693	0.88893
ARHGAP32	0	0		ASB8	1.85269	1.87965	2.52502
ARHGAP33	0.250767	0.369857		ASB9	0.0399236	0.0586174	0.072799
ARHGAP35	0.727055	0.870993		ASCC1	1.79026	1.62789	1.48324
ARHGAP39	0.177605	0.150616		ASCC2	1.31804	1.31956	1.21809
ARHGAP4	5.01364	5.54117		ASCC3	0.913886	0.942722	0.878137
ARHGAP42	0.0244968	0.0216723		ASDURF	0.518676	0.0640277	0.0149255
ARHGAP42-AS1	0.0635772	0		ASF1A	10.1755	9.455	9.3771
ARHGAP44	0.00238651	0.000576785		ASF1B	6.361	6.5274	4.05694
ARHGAP45	2.98224	3.06325		ASGR1	0.208156	0.268948	0.265695
ARHGAP5	0.760985	0.731146		ASH1L	0.865061	0.831882	0.837794
ARHGAP5-AS1	0.111877	0.77814		ASH1L-AS1	7.98438	7.22425	7.45544
ARHGAP6	0.33084	0.286585		ASH2L	15.7354	13.8532	14.3494
ARHGAP8	0.018131	0.0091715		ASIC1	0.00979766	0.0263731	0.0625296
ARHGAP9	0.247755	0.427371		ASIC3	1.20105	1.10844	1.66862
ARHGDIA	48.0079	61.9092		ASIC4	1.40123	1.71547	1.49519
ARHGDIB	3.30628	3.23383		ASL	6.34294	5.93238	4.90951
ARHGDIG	0.215284	0.77396		ASMTL	0.726388	0.692492	0.609381
ARHGEF1	2.90764	3.52427		ASMTL-AS1	0.052073	0.022427	0.0379812
ARHGEF10	0.046661	0.111385		ASNS	117.833	98.2519	112.182
ARHGEF10L	0.00152495	0		ASNSD1	10.3702	9.09063	9.75172
ARHGEF11	0.54965	0.603812		ASNSP1	0.419377	0.43542	0.355046
ARHGEF12	1.75339	1.54702		ASPH	1.83099	1.9509	1.28296
ARHGEF16	0.0508108	0.0631855		ASPM	11.1189	11.4311	7.5978
ARHGEF17	0.00663473	0.026074		ASPRV1	0.597345	0.749886	0.308888
ARHGEF18	0.407484	0.464933		ASPSCR1	1.60704	1.33753	1.44512
ARHGEF19	0.516917	0.677557		ASRGL1	0.638815	0.503581	0.574105
ARHGEF2	4.04579	4.24726		ASS1	0.743689	0.544402	0.787601
ARHGEF25	3.35267	3.38268		ASTE1	1.3533	1.39723	1.04838
ARHGEF26	0.00402954	0.00198834		ASTN1	0.00248998	0.00402148	0.00378365
ARHGEF2-AS2	0.674695	0.696005		ASTN2	0.00617847	0.00623663	0.00445953
ARHGEF3	0.00753975	0.0121483		ASXL1	2.63754	2.44095	2.64331
ARHGEF34P	0.0114013	0.0101507		ASXL2	0.824845	0.851069	0.648279
ARHGEF35	0.0438327	1.8729e-11		ATAD1	1.7337	1.59281	1.54439
ARHGEF35-AS1	0.00683627	0.00385842		ATAD2	6.39585	5.91503	6.2523
ARHGEF37	0.00539574	0		ATAD2B	0.888617	0.758796	0.923686
ARHGEF39	1.17907	0.89889		ATAD3A	10.623	10.962	9.40244
ARHGEF4	0.0068803	0		ATAD3B	7.59246	7.64765	7.13494
ARHGEF40	1.00223	0.9689		ATAD5	3.87218	3.42922	3.98033
ARHGEF5	0.00787415	0.0125852		ATAT1	0.178917	0.178882	0.244686
ARHGEF6	0.329999	0.385664		ATE1	0.265456	0.266082	0.300621
ARHGEF7	0.178982	0.200242		ATF1	2.06681	1.81379	2.3808
ARHGEF9	0.000593068	0		ATF2	3.1571	2.71716	3.2295
ARID1A	1.46906	1.8136		ATF3	2.00124	2.05061	1.27868
ARID1B	0.251665	0.269524		ATF4	404.537	394.246	376.081
ARID2	0.56499	0.616316		ATF4P3	3.6596	2.62344	3.00812
ARID3A	4.9511	4.92802		ATF5	33.5918	24.9792	28.9936
ARID3B	0.495701	0.679246		ATF6	1.6299	1.46602	1.40007
ARID3BP1	0.63988	0.350343		ATF6B	10.7238	9.53558	10.1804
ARID4A	0.297579	0.216019		ATF7	0.286481	0.253511	0.292895
ARID4B	0.55648	0.454056		ATF7IP	1.37306	1.16888	1.67592
ARID5A	0.956226	0.885295		ATF7IP2	0.777281	0.745958	0.786424
ARID5B	0.0275302	0.0414005		ATG10	0.188487	0.153336	0.136961
ARIH1	0.94819	0.967858		ATG101	7.5836	8.29864	6.65194
ARIH2	3.54672	3.47682		ATG12	9.76489	9.49581	9.74797
ARIH2OS	1.75386	1.52923		ATG12P1	2.43786	1.64054	8.61284
ARL1	5.70591	3.90849		ATG13	3.05546	2.90351	3.01046
ARL10	0.330887	0.00961501		ATG14	0.722149	0.677707	0.879433
ARL11	0.314663	0.28247		ATG16L1	0.465256	0.489707	0.437783
ARL13B	0.4402	0.35603		ATG16L2	0.968452	0.995771	0.784149
ARL14EP	1.944	1.92268		ATG2A	4.74881	4.94933	4.33988
ARL15	0.184553	0.153677		ATG2B	2.20171	2.0847	1.7708
ARL16	11.0829	8.67799		ATG3	4.04617	3.82595	3.66536
ARL17A	0.540631	0.435817		ATG4A	1.35173	1.38342	1.36914
ARL17B	0.0997092	0.0641628		ATG4B	2.23694	2.17218	1.85522
ARL2	14.1213	18.826		ATG4C	0.775026	0.726367	0.680867
ARL2BP	6.0845	5.53954		ATG4D	7.40036	7.40506	8.27276
ARL2-SNX15	0.0860926	0.145799		ATG5	0.581102	0.657552	0.494933
ARL3	0.283859	0.244656		ATG7	0.238938	0.23366	0.210685
ARL4A	43.8677	32.2529		ATG9A	11.1993	10.9843	10.9808
ARL4AP4	0.997842	0		ATG9B	0.394757	0.447409	0.672836
ARL4AP5	0.732001	0.197249		ATIC	3.48428	3.32625	3.41068
ARL4C	0	0.0769412		ATL1	0.00125785	0.00135434	0.0116593
ARL4D	0.2731	0.362377		ATL2	3.22839	3.11309	3.32199
ARL5A	6.54565	5.48936		ATL3	5.63475	4.98062	4.97676
ARL5AP4	0.673024	0.37954		ATM	1.77198	1.69895	1.57013
ARL5B	2.95109	3.20768		ATMIN	10.7613	11.563	8.07168
ARL6	0.060077	0.0370556		ATN1	0.907988	0.869867	1.17983
ARL6IP1	18.7729	26.4726		ATOX1	1.60993	1.3558	1.49478
ARL6IP4	69.9022	75.4201		ATP10D	0.0129793	0.0165158	0.00860624
ARL6IP5	1.08641	1.02876		ATP11A	0.363363	0.366131	0.299991
ARL6IP6	1.11575	0.904729		ATP11B	4.50637	4.19429	4.77973
ARL8A	1.9873	1.78559		ATP11C	1.06319	0.982108	0.899158
ARL8B	1.29641	1.27202		ATP13A1	6.90964	7.23134	6.3627
ARLNC1	0.00653861	0.00636613		ATP13A2	4.44932	4.01777	4.20897
ARMC1	2.79054	3.20364		ATP13A3	6.23515	6.29821	5.85387
ARMC10	5.02339	4.96923		ATP1A1	38.9863	37.8165	35.8612
ARMC10P1	2.78704	0.0455741		ATP1A1-AS1	0.223404	0.234127	0.696165
ARMC2	0.00464696	0.00369963		ATP1A2	0.0275248	0.0246968	0.0167301
ARMC3	0.00873165	0.00844125		ATP1B1	0.174805	0.198388	0.104794
ARMC5	3.4876	3.54561		ATP1B1P1	0.97681	0.901492	0.636133
ARMC6	7.45842	7.97737		ATP1B2	0.320812	0.518131	0.386509
ARMC7	0.588416	0.736332		ATP1B3	6.44669	6.48586	6.02314
ARMC8	0.563374	0.51756		ATP23	0.653921	0.680786	0.547977
ARMC9	0.0100495	0.0061032		ATP2A1	0.137178	0.174076	0.166044
ARMCX1	0.165907	0.290037		ATP2A1-AS1	3.84109	3.7079	2.39426
ARMCX3	5.18894	5.89094		ATP2A2	12.4708	11.5395	11.6016
ARMCX5	7.29658	7.64749		ATP2A3	6.31888	5.3846	4.04913
ARMCX5-GPRASP2	0.0217873	0.033149		ATP2B1	1.99446	1.82998	1.8616
ARMCX5-GPRASP2	0.0165708	0.0180224		ATP2B1-AS1	0.457015	0.416369	0.35257
ARMCX6	6.6313	7.25659		ATP2B4	1.95396	1.73699	1.90256
ARMCX7P	3.53269e-07	0.151134		ATP2C1	1.03611	1.00469	1.03782
ARMH1	0	0		ATP5F1A	57.123	56.4096	53.4214
ARMH3	0.00163626	0.000184548		ATP5F1B	397.226	394.024	384.517
ARMH4	8.34461e-44	0.000651211		ATP5F1C	26.7322	26.5808	24.0649
ARMT1	2.82135	2.7705		ATP5F1D	41.6628	37.9402	34.0544
ARNT	1.25809	1.32497		ATP5F1E	88.7889	88.0366	87.3691
ARNTL	0.0199373	0.0130001		ATP5IF1	32.5887	30.9889	28.8821
ARNTL2	0.0268406	0.00924995		ATP5MC1	41.5886	41.0618	37.6924
ARPC1A	1.82962	2.65866		ATP5MC2	11.7814	10.6729	11.4427
ARPC1B	20.0004	21.0348		ATP5MC2P4	8.2082	8.83784	8.59233
ARPC2	3.42123	3.00448		ATP5MC3	199.497	206.006	185.187
ARPC3	8.62114	7.64098		ATP5ME	126.74	119.195	119.386
ARPC3P1	0.474171	0.0729173		ATP5MF	27.9073	25.3063	23.3926
ARPC3P3	8.47348	0.283169		ATP5MFP2	1.47895	0.530801	53.4867
ARPC4	13.1033	13.7437		ATP5MF-PTCD1	1.07194	1.01021	0.86633
ARPC4-TTLL3	0.376102	0.424234		ATP5MG	13.9937	14.0335	13.559
ARPC5	9.4094	9.25187		ATP5MJ	12.0877	12.3611	10.2704
ARPC5L	5.91609	5.55925		ATP5MK	35.2279	35.7162	31.8368
ARPIN-AP3S2	0.182871	0.24898		ATP5PB	78.6838	78.5984	69.8399
ARPP19	8.32677	9.86797		ATP5PD	40.2874	41.973	35.3837
ARRB1	0.682069	0.97889		ATP5PF	9.71059	10.0754	8.79022
ARRB2	1.20088	1.50413		ATP5PO	63.6267	62.4521	59.3896
ARRDC1	4.59049	4.83203		ATP6AP1	28.5358	27.0105	28.7636
ARRDC1-AS1	20.0681	22.6125		ATP6AP1L	0.0463153	0.0562615	0.0313996
ARRDC2	5.01563	4.5274		ATP6AP2	6.19898	5.97401	5.2154
ARRDC3	7.4891	7.53377		ATP6V0A1	3.04088	3.00453	2.49302
ARRDC3-AS1	0.035762	0.0122176		ATP6V0A2	5.53863	5.99967	4.58125
ARRDC4	4.30899	3.84772		ATP6V0B	77.9379	80.3421	84.2601
ARRDC5	0	0		ATP6V0C	12.8303	11.9099	12.3869
ARSA	1.41777	1.89305		ATP6V0CP4	2.6117	1.56224	3.43945
ARSB	0.0481714	0.0649365		ATP6V0D1	2.74485	2.99363	2.96639
ARSD	0.00903317	0.00765721		ATP6V0D1-DT	0.284729	0.217387	0.117998
ARSG	0.01238	0.011644		ATP6V0E1	1.94953	1.84101	2.0658
ARSI	0	0.00723658		ATP6V0E2	2.91255	3.05304	3.07121
ARSK	0.176422	0.210639		ATP6V0E2-AS1	0.435036	0.447116	0.206141
ART3	0.00135639	0.00305966		ATP6V1A	6.65285	6.91565	7.78409
ART5	0.090562	0.0919276		ATP6V1B1-AS1	0.16399	0.10817	0.0821796
ARTN	0.0439414	0		ATP6V1B2	13.3714	10.9508	17.2966
ARV1	2.93216	3.31066		ATP6V1C1	3.89515	4.17279	3.75958
ARVCF	2.42683	2.70402		ATP6V1C2	0.0119682	0.00214772	0.154352
ARX	0.00270754	0		ATP6V1D	2.04231	2.03624	2.28602
AS3MT	5.97767e-08	1.38579e-06		ATP6V1E1	8.39385	7.91505	9.59233
ASAH1	1.88843	2.00173		ATP6V1E1P1	0.937467	0.403752	13.23
ASAH2	0.145484	0.0944063		ATP6V1E1P3	2.26534	0.886951	5.74657
ASAH2B	0.253027	0.247516		ATP6V1E2	0.739078	0.54643	0.512117
ASAP1	0.0609849	0.0646144		ATP6V1F	71.7794	66.1195	78.3022
ASAP1-IT2	0.118765	0.0956793		ATP6V1FNB	1.04951	1.0098	0.943798
ASAP2	0.062362	0.0552928		ATP6V1G1	19.6365	19.1931	19.679
ASAP3	1.28099	1.31572		ATP6V1G2	0.0961469	0.379581	0.448675
ASB1	1.96954	2.24424		ATP6V1G2-DDX39B	0.331994	0.387451	0.173559
ASB12	0.0107449	0.0121188		ATP6V1H	0.929573	0.91712	0.956641
ASB13	1.80936	1.75481		ATP7A	1.69996	1.58098	1.58418
ASB14	0.0143263	0.00478947		ATP7B	1.4411	1.26555	1.3937
ASB16	0.355786	0.0044993		ATP8A1	0.00410667	0.00718524	0.00655229
ASB16-AS1	0.809933	0.975598		ATP8A2	0.000976352	0.00147175	0.0010682
ASB2	0	0		ATP8B1	0.00732454	0.00350507	0.002968
ASB3	0.0984208	0.0713241		ATP8B2	6.53269	6.74056	5.47743
ASB6	5.51432	5.54771		ATP8B3	1.09073	0.969562	0.794018
ASB7	0.440945	0.648896		ATP8B4	0.00118014	0.00169422	0.00411801
ASB8	0.638146	0.955782		ATP9A	0.0029715	0.0079986	0.0020319
ASB9	0.0088155	0.0187807		ATP9B	0.0979307	0.0929854	0.0757238
ASCC1	0.398429	0.342106		ATPAF1	2.61693	2.7174	2.48498
ASCC2	0.945782	1.24503		ATPAF2	0.224105	0.271391	0.269364
ASCC3	0.551813	0.553855		ATPSCKMT	2.36092	2.5082	1.58455
ASCL2	1.15357	1.35683		ATR	1.57184	1.72844	1.24962
ASDURF	0.32266	0.0641504		ATRAID	20.694	19.2661	19.6053
ASF1A	3.96223	3.98741		ATRIP	1.51211	1.54462	0.955715
ASF1B	4.89999	6.53351		ATRN	0.517537	0.487772	0.408507
ASGR1	0.202236	0.0570239		ATRX	0.406165	0.385039	0.410339
ASGR2	0	0		ATXN1	0.00248529	0.000891977	0.00226591
ASH1L	0.443809	0.452953		ATXN10	0.632622	0.634123	0.600034
ASH1L-AS1	3.85119	4.7994		ATXN1-AS1	0.842792	0.635209	0.461039
ASH1L-IT1	0.177806	0.120325		ATXN1L	0.716271	0.79269	0.693512
ASH2L	10.283	10.0515		ATXN2	0.971161	0.800086	0.948787
ASIC1	0.0356963	0.0954326		ATXN2-AS	0.672901	1.44904	0.460128
ASIC3	0.131198	0.191496		ATXN2L	26.5966	24.9774	24.8424
ASIC4	2.02666	2.1768		ATXN3	1.04406	0.986945	0.921914
ASIP	0.00829489	0		ATXN3L	0	0	4.83667
ASL	5.91576	5.95169		ATXN7	0.420429	0.399769	0.417334
ASMTL	0.364486	0.256418		ATXN7L1	0.0422748	0.0333796	0.0226976
ASMTL-AS1	0.0520708	0.00634012		ATXN7L2	2.08104	1.79844	2.28431
ASNS	8.3161	7.78582		ATXN7L3	15.4744	15.9334	12.6094
ASNSD1	5.23561	4.85353		ATXN7L3B	33.1983	33.1025	28.4541
ASNSP1	0.0733363	0.0254002		AUH	0.163802	0.155018	0.160347
ASPH	0.668715	0.542805		AUNIP	3.40693	3.47363	2.89877
ASPHD1	0.00176803	0		AUP1	91.2137	92.5196	93.3616
ASPHD2	0.0568627	0.167734		AURKA	15.4619	14.7787	14.8172
ASPM	7.98045	7.04009		AURKAIP1	119.368	123.853	106.92
ASPN	0.0262024	0		AURKAP1	0.494153	1.08813	3.4969
ASPRV1	0.0460939	0.0514489		AURKB	18.2777	16.4467	17.1801
ASPSCR1	1.30112	1.43111		AURKC	0.268976	0.289609	0.36785
ASRGL1	0.468969	0.39167		AVEN	0.103858	0.0870456	0.0795334
ASS1	0.0783238	0.114564		AVIL	0.0239454	0.0193367	0.0328817
ASS1P1	0.334281	0.0314187		AVL9	4.02481	3.77798	3.7097
ASS1P12	0.972	0		AVPI1	1.01439	1.12021	1.06713
ASS1P2	0.338108	0.444897		AXDND1	0.00270206	0.00436399	0.00307943
ASTE1	0.505352	0.747675		AXIN1	3.01391	2.7313	3.01533
ASTN1	0.00313596	0.00404222		AXIN2	0.196815	0.261775	0.154813
ASTN2	0.00514125	0.00583782		AXL	0.528211	0.481481	0.322881
ASXL1	1.10963	1.2328		AZI2	4.19261	4.35269	3.73555
ASXL2	0.664009	0.722863		AZIN1	6.56936	6.54374	5.90701
ATAD1	0.623209	0.615525		AZIN2	0.0120487	0.0324323	0.0137314
ATAD2	2.54866	2.4028		AZU1	0.387365	0.139027	0.235448
ATAD2B	0.422289	0.40289		B2M	124.213	120.699	119.481
ATAD3A	18.7998	17.9952		B3GALNT1	0.379568	0.383141	0.302805
ATAD3B	12.8661	11.1601		B3GALNT2	1.74814	1.70457	1.48098
ATAD3C	0.0102743	0.00379633		B3GALT1	0	0	1.4737
ATAD5	1.55676	1.4432		B3GALT1-AS1	0.97764	0.888429	1.02625
ATAT1	0.127613	0.208115		B3GALT2	0	0	0.33961
ATE1	0.163744	0.169662		B3GALT4	0.414018	0.303128	0.286878
ATE1-AS1	0.0295996	0.00657224		B3GALT6	19.7556	21.6141	12.1185
ATF1	0.967434	1.01672		B3GALT9	3.38064	4.33504	2.23036
ATF2	0.725534	0.815842		B3GAT1	0.0189222	0.0448221	0.0103511
ATF3	0.650721	0.559378		B3GAT1-DT	0.038285	0.0883323	0.0211926
ATF4	154.987	134.069		B3GAT2	0.0089038	0	0.0193295
ATF4P3	4.73933	1.28866		B3GAT3	11.8577	11.264	9.23286
ATF4P4	0.1096	0.0727808		B3GLCT	0.178541	0.183924	0.140784
ATF5	7.03271	7.1656		B3GNT2	6.07249	5.57273	5.71137
ATF6	0.579976	0.616241		B3GNT4	0.363286	0.365077	0.848273
ATF6B	3.47796	3.93138		B3GNT5	1.70142	1.79244	2.0394
ATF7	0.145226	0.220751		B3GNT8	1.3253	1.01926	0.897603
ATF7IP	0.43809	0.450501		B3GNT9	2.33755	2.27942	2.72482
ATF7IP2	0.535936	0.460332		B3GNTL1	0.256167	0.24949	0.224599
ATF7-NPFF	1.84009e-09	0.00422097		B4GALNT1	3.66256	3.44009	3.25211
ATG10	0.0713275	0.0415634		B4GALNT4	3.74378	4.52121	3.07198
ATG101	7.74129	7.3443		B4GALT1	0.962542	0.895152	0.802145
ATG10-AS1	1.70167	0		B4GALT2	9.72138	10.5346	7.96834
ATG10-IT1	0.0707573	0		B4GALT3	23.7189	23.8662	27.825
ATG12	4.88661	4.21193		B4GALT4	0.874092	0.757621	0.876629
ATG12P1	3.70083	0.185513		B4GALT5	1.32204	1.47781	1.15213
ATG13	1.37171	1.80853		B4GALT6	0.0361418	0.0237809	0.0311209
ATG14	0.427247	0.292512		B4GALT7	2.32857	2.15672	1.48383
ATG16L1	0.530825	0.516994		B4GAT1	10.8666	11.883	10.7846
ATG16L2	0.234344	0.258931		B9D1	0.433504	0.413504	0.358837
ATG2A	3.81746	3.69507		B9D2	0.484591	0.648678	0.501519
ATG2B	0.784208	0.756081		BAAT	0.0204496	0.0220182	0.03356
ATG3	3.85456	3.9711		BABAM1	10.7399	10.8398	9.69122
ATG4A	0.263621	0.259701		BABAM2	0.11319	0.102887	0.111236
ATG4B	1.57037	1.97162		BACE1	0	0	0.207841
ATG4C	0.242187	0.244503		BACE1-AS	2.56913	2.55135	1.90279
ATG4D	6.02037	5.7783		BACE2	0.0044516	0.00239654	0.00507331
ATG5	0.322747	0.280292		BACH1	1.35323	1.23407	1.59171
ATG7	0.145457	0.11604		BACH1-IT1	0.0622176	0.147379	0.0907609
ATG9A	6.21807	10.2298		BACH1-IT2	0.397395	0.427879	0.0362316
ATG9B	1.71458	0.180238		BACH2	0.0885967	0.0890829	0.0687492
ATIC	1.85515	2.40373		BAD	0.763952	0.914977	0.955708
ATL1	0.00792532	0.000382872		BAG1	4.10979	4.49012	4.30493
ATL2	1.26328	1.26997		BAG2	11.3331	11.4408	10.5282
ATL3	1.88231	1.8427		BAG3	2.01376	1.90825	2.01652
ATM	0.786558	0.636223		BAG4	6.15686	5.63835	7.23043
ATMIN	7.01127	7.60485		BAG5	18.6732	18.8685	14.7967
ATN1	0.794951	0.929243		BAG6	62.2175	58.959	65.3509
ATOX1	0.823354	0.823164		BAGE2	0.652856	0.607337	0.548263
ATP10A	0	0		BAHCC1	0.628722	0.737081	0.461536
ATP10D	0	0.00143662		BAHD1	4.6433	4.58	4.70205
ATP11A	0.174802	0.203068		BAIAP2	0.902792	0.873504	0.891065
ATP11B	1.90441	1.62222		BAIAP2-DT	3.28531	4.54115	2.38815
ATP11C	0.614632	0.552454		BAIAP2L1	0.921682	0.82531	0.851231
ATP13A1	5.79192	6.1393		BAIAP3	0.912945	1.00037	0.801235
ATP13A2	2.49304	3.35359		BAK1	5.80153	5.96262	6.28119
ATP13A3	2.6551	2.65332		BAMBI	9.11182	7.55453	7.79231
ATP1A1	17.8152	20.3084		BANCR	0.0973329	0.095272	0.0564716
ATP1A1-AS1	0.419751	0.0643744		BANF1	48.1636	51.572	51.1801
ATP1A2	0.00123806	0		BANP	0.378482	0.357699	0.480616
ATP1A3	0.00770058	0.000105567		BAP1	13.5896	14.2197	11.9762
ATP1B1	0.155549	0.0819692		BARD1	0.8873	0.759057	0.666298
ATP1B1P1	0.564899	0.254852		BATF2	1.04128	1.43932	0.846728
ATP1B2	0.0742114	0.341777		BATF3	0.0951155	0.0921705	0.0867195
ATP1B3	1.63186	2.2159		BAX	5.57608	6.37782	5.30056
ATP1B4	0.0358183	0.00183628		BAZ1A	1.50104	1.34886	1.37896
ATP23	0.456768	0.574449		BAZ1B	9.72189	8.92641	9.6342
ATP2A1	0.170562	0.0641237		BAZ2A	6.91053	6.24673	6.52293
ATP2A1-AS1	6.61295	6.8941		BAZ2B	0.218389	0.218049	0.192725
ATP2A2	4.69771	4.97781		BBC3	6.63803	6.77891	6.1885
ATP2A3	3.88344	4.45087		BBIP1	1.55924	1.77958	1.42905
ATP2B1	0.781645	0.664144		BBOF1	0.168864	0.183981	0.160754
ATP2B1-AS1	1.4666	0.507807		BBOX1-AS1	0.0347029	0.0254399	0.0383715
ATP2B2	0	0		BBS1	0.939955	0.98857	0.758139
ATP2B4	0.731216	0.747187		BBS10	11.4014	13.1479	9.74532
ATP2C1	0.305757	0.286132		BBS12	2.31563	1.97664	1.74033
ATP2C2-AS1	0	0.05276		BBS2	0.460799	0.39074	0.384209
ATP4A	0.00758559	0.00570369		BBS4	1.84333	1.75077	1.4736
ATP5F1A	28.3849	26.013		BBS5	0.613571	0.623329	0.598385
ATP5F1AP3	0.114329	0		BBS7	1.40521	1.22708	1.37952
ATP5F1B	191.73	214.085		BBS9	0.0118098	0.0121784	0.00803759
ATP5F1C	15.0856	13.3711		BBX	0.456447	0.45285	0.388304
ATP5F1D	30.1516	31.1931		BCAM	0.0620272	0.0556544	0.0754026
ATP5F1E	33.7985	22.3427		BCAN	0.0140752	0	0.152645
ATP5IF1	40.0994	39.2096		BCAN-AS1	7.56904	7.29629	4.66083
ATP5MC1	23.2242	32.3602		BCAP29	4.06339	3.97815	3.69045
ATP5MC1P2	0.670731	0.0945619		BCAP31	12.2411	11.2386	9.99025
ATP5MC1P5	2.34756	0		BCAR1	1.07794	1.07816	0.955261
ATP5MC2	3.18955	4.71333		BCAR3	0.0299736	0.0236025	0.0440507
ATP5MC2P4	16.9012	0.0925356		BCAS1	0.0343496	0.0369845	0.0287077
ATP5MC3	59.767	68.8781		BCAS2	11.3866	9.98374	9.33909
ATP5ME	59.8227	76.3563		BCAS2P2	1.02763	1.24477	2.10807
ATP5MF	16.3349	20.4519		BCAS3	0.0198114	0.0203703	0.0201781
ATP5MFP2	1.06437	0.150058		BCAS4	0.0403451	0.0400984	0.0497021
ATP5MF-PTCD1	1.10971	1.05794		BCAT1	19.8129	20.1933	18.1679
ATP5MG	5.05433	4.10569		BCAT2	6.66882	6.3022	6.09473
ATP5MGL	0.17251	0.048642		BCCIP	7.24596	6.99015	6.48127
ATP5MJ	3.76237	3.8009		BCDIN3D	2.00634	2.3354	1.42173
ATP5MK	6.81596	6.3054		BCDIN3D-AS1	0.270208	0.238983	0.217569
ATP5PB	37.907	34.1075		BCKDHA	3.4736	3.52449	3.86217
ATP5PBP1	0.362724	0.223148		BCKDHB	0.174241	0.181296	0.154488
ATP5PBP3	0.83918	0		BCKDK	7.12427	6.84817	6.14712
ATP5PD	13.4684	14.9802		BCL10	5.50388	5.55887	4.61954
ATP5PDP4	2.39398	0		BCL2	0.0901904	0.0621776	0.0550166
ATP5PF	6.03024	5.36207		BCL2A1	0.0371712	0.0400226	0.0564834
ATP5PO	22.8456	19.7592		BCL2L1	7.43307	6.60398	6.02474
ATP6AP1	11.2197	14.6557		BCL2L11	0.429357	0.459491	0.426847
ATP6AP1L	0.035255	0.0198814		BCL2L12	8.99239	9.72916	7.0261
ATP6AP2	1.53502	1.40597		BCL2L13	4.41878	4.00971	3.44551
ATP6V0A1	2.55067	2.92798		BCL2L2	5.55458	5.36422	5.15653
ATP6V0A2	3.25525	3.1924		BCL2L2-PABPN1	0.90044	1.47781	0.976802
ATP6V0B	106.011	79.7592		BCL3	0.362148	0.256238	0.264145
ATP6V0C	4.67437	7.00771		BCL6	2.09755	2.66497	2.50957
ATP6V0CP4	3.60251	1.58993		BCL6B	1.51647	1.32902	1.22184
ATP6V0D1	1.63002	1.91856		BCL7A	1.38997	1.18051	1.22358
ATP6V0D1-DT	0.115962	0.149699		BCL7B	2.85469	3.18966	2.99556
ATP6V0E1	1.57307	1.1041		BCL7C	1.029	1.01051	0.886375
ATP6V0E2	1.21898	1.38355		BCL9	0.195935	0.150921	0.142911
ATP6V0E2-AS1	0.386713	0.255809		BCL9L	0.56169	0.656248	0.504845
ATP6V1A	2.18703	2.29639		BCLAF1	17.2239	18.383	18.1873
ATP6V1B1-AS1	0.0152158	0.0422102		BCLAF1P2	2.15672	3.28146	3.31067
ATP6V1B2	5.07998	4.7908		BCLAF3	0.173389	0.189083	0.101336
ATP6V1C1	1.25935	1.19385		BCOR	3.45856	3.11361	2.95873
ATP6V1C2	0.0368845	0		BCORL1	0.320182	0.228638	0.276794
ATP6V1D	0.517706	0.500151		BCR	2.78539	2.62603	2.6316
ATP6V1E1	4.574	3.97095		BCRP2	0.0624427	0.0742084	0.181447
ATP6V1E1P1	0.63618	0.171211		BCRP3	0.0570353	0.0564694	0.0402819
ATP6V1E1P3	11.5841	1.44176		BCS1L	11.1859	11.574	9.42293
ATP6V1E2	0.313054	0.224215		BCYRN1	305.801	248.834	208.96
ATP6V1F	45.3195	56.1426		BDH1	0.00602838	0.0129816	0.00732832
ATP6V1FNB	0.114335	0.346644		BDH2	0.871126	0.950291	0.773267
ATP6V1G1	16.2769	13.0324		BDNF-AS	0.0100064	0.00933745	0.0072985
ATP6V1G1P4	0.514311	0.928118		BDP1	2.20148	2.21347	1.97601
ATP6V1G2	0.0885704	0.039021		BECN1	4.16865	4.26934	3.92365
ATP6V1G2-DDX39B	0.0688136	0.544328		BEGAIN	0.0152406	0.0218796	0.00926351
ATP6V1H	0.36231	0.394976		BEND3	0.286649	0.390577	0.289099
ATP7A	0.462939	0.491441		BEND3P1	0	0.0305099	4.25711
ATP7B	0.70993	0.808793		BEND6	0.0830717	0.0989594	0.0902421
ATP8A1	0.000831224	0		BEND7	0.203184	0.164078	0.151801
ATP8A2	0.000210797	0.000178313		BEST1	0.999783	1.0053	2.57907
ATP8B1	0.000878547	0.00148633		BET1	3.55859	3.20071	3.61366
ATP8B2	3.8776	5.24636		BET1L	3.23993	3.01506	2.71908
ATP8B3	0.327451	0.313987		BEX2	18.1307	15.3856	17.651
ATP8B4	0.0165201	0.00431061		BEX4	120.94	144.738	105.039
ATP8B5P	0.0011886	0.00305698		BEX5	1.2937	0.545065	0.564112
ATP9A	0.0096233	0.0108538		BFAR	4.51563	4.40764	3.70021
ATP9B	0.0559747	0.074962		BGLAP	0.477615	0.301585	0.627316
ATPAF1	1.24997	1.23499		BGLT3	15.9443	18.1365	21.5709
ATPAF2	0.24693	0.255951		BHLHA15	1.20725	1.81296	0.68758
ATPSCKMT	1.36897	1.22374		BHLHB9	0.177788	0.22597	0.142433
ATR	1.06662	1.05426		BHLHE40	119.355	98.2224	114.987
ATRAID	12.434	16.5358		BHLHE40-AS1	0.0274896	0.0526192	0.0821314
ATRIP	1.91584	2.07542		BICD1	0.122702	0.108274	0.113973
ATRN	0.29331	0.307724		BICD2	2.18253	2.3191	2.2729
ATRX	0.271772	0.271298		BICDL1	0.0158649	0.0170819	0.00778856
ATXN1	0.00499317	0.000336216		BICDL2	0.124058	0.19294	0.10054
ATXN10	0.114954	0.129592		BICRA	0.032229	0.0433765	0.0355057
ATXN1-AS1	2.16079	0.769603		BICRAL	0.545998	0.473698	0.519823
ATXN1L	0.63591	0.588821		BID	2.27506	2.18229	2.04845
ATXN2	0.293678	0.288641		BIN1	0.0926457	0.0835137	0.0825034
ATXN2-AS	1.08241	0.716876		BIN2	0.0263379	0.0283582	0.024013
ATXN2L	6.72868	9.06455		BIN3	0.869893	0.883019	0.588304
ATXN3	0.34389	0.309038		BIRC2	6.63169	6.06107	6.67543
ATXN3L	5.25129	0		BIRC3	0.104687	0.169076	0.148471
ATXN7	0.19009	0.161212		BIRC5	28.4445	28.2739	26.8079
ATXN7L1	0.0228181	0.0213035		BIRC6	2.42763	2.58648	2.26087
ATXN7L2	1.64054	2.39624		BISPR	2.04298	1.85344	1.66192
ATXN7L3	10.8904	12.5821		BIVM	2.24128	2.48926	1.53129
ATXN7L3-AS1	0.0214345	0		BIVM-ERCC5	0.195248	0.085281	0.164494
ATXN7L3B	21.9933	26.4728		BLACAT1	0.477223	0.563356	0.152022
AUH	0.251744	0.252182		BLCAP	1.64554	1.66711	1.497
AUNIP	3.04271	2.77951		BLM	2.03888	2.0186	1.78262
AUP1	82.4481	82.855		BLMH	5.24663	5.43596	5.27195
AURKA	5.6456	5.97821		BLOC1S1	14.83	14.1228	12.6667
AURKAIP1	213.396	236.144		BLOC1S2	4.69725	3.98039	4.11755
AURKAP1	2.32138	0.9747		BLOC1S3	0.595743	0.565766	0.44551
AURKB	13.3067	14.2729		BLOC1S4	40.4201	41.9532	26.468
AURKC	1.05983	1.04797		BLOC1S5	2.50709	2.27408	1.99375
AVEN	0.0504841	0.0305353		BLOC1S5-TXNDC5	0.276547	0.359799	0.372993
AVIL	0.148634	0.0163995		BLOC1S6	10.8866	10.2874	9.70789
AVL9	1.61685	1.58332		BLVRA	2.52149	2.31939	2.4257
AVPI1	1.66012	2.05844		BLVRB	44.4547	38.7988	46.5198
AVPR1A	0.012244	0.0276193		BLZF1	3.67797	3.21426	2.93364
AVPR2	0.193255	0		BMERB1	0.021442	0.0115434	0.0158838
AXIN1	2.97542	3.22363		BMF	0.291805	0.412373	0.365815
AXIN2	0.196815	0.166802		BMI1	30.6717	31.2492	32.8369
AXL	0.19034	0.209197		BMP1	1.19059	1.23822	1.25326
AZI2	1.06192	1.19855		BMP10	0.754729	0.419418	0.277463
AZIN1	1.7587	2.10634		BMP2K	5.00803	4.26103	4.49817
AZIN2	0.0211359	0.0100855		BMP8A	0.0201204	0.0189365	0.0292095
AZU1	0.129432	0.0673764		BMP8B	0.0603479	0.042234	0.0455838
B2M	53.8052	53.2194		BMPR1A	0.38901	0.435207	0.320336
B3GALNT1	0.0944341	0.11373		BMPR2	0.176092	0.174518	0.188522
B3GALNT2	1.05751	1.01603		BMS1	4.94167	4.91851	4.12877
B3GALT1	4.41959	0		BMS1P1	0.586208	0.630543	0.535714
B3GALT1-AS1	0.576656	0.449445		BMS1P2	0.404274	0.378683	0.399279
B3GALT2	0.262244	0		BMS1P4	0.430601	0.359001	0.335332
B3GALT4	0.442467	0.514167		BMS1P4	0.254847	0.311835	0.258498
B3GALT6	28.9061	31.2028		BMS1P4-AGAP5	0.194388	0.225242	0.221816
B3GALT9	1.91473	1.07556		BMS1P7	8.17452e-06	0.133362	0.0890381
B3GAT1	0.0194054	0.0449252		BMS1P8	0.328868	0.313238	0.345758
B3GAT1-DT	0.00258307	0.00998863		BMT2	0.33949	0.314289	0.276738
B3GAT2	0.010583	0.000774341		BMX	0.0318225	0.0253253	0.0428895
B3GAT3	9.75091	12.4432		BNIP1	2.49016	1.95057	2.55633
B3GAT3P1	0.131536	0.289317		BNIP2	7.28141	7.22921	5.48078
B3GLCT	0.076574	0.0895966		BNIP3	34.7486	30.0938	40.0193
B3GNT2	2.50819	2.40794		BNIP3L	5.67991	5.46291	5.82894
B3GNT3	0.0036758	0		BNIP3P1	0.616013	0.186341	0.674446
B3GNT4	1.64668	0.589756		BNIP3P17	0	0	1.99315
B3GNT5	0.782328	0.728312		BNIP3P41	0.496338	0.400809	0.339394
B3GNT7	0	0		BNIPL	0.235206	0.373842	0.31656
B3GNT8	0.654023	0.818331		BOD1	4.96507	4.42123	5.2364
B3GNT9	0.910446	2.04058		BOD1L1	2.18837	2.02529	2.11558
B3GNTL1	0.209242	0.257667		BOK	0.168685	0.108975	0.133289
B4GALNT1	4.12083	4.66885		BOLA2	0.0643219	1.14467e-09	0.0962065
B4GALNT3	0	0		BOLA2B	37.2925	38.9723	32.512
B4GALNT4	5.04909	4.74916		BOLA2-SMG1P6	8.31074	8.75385	6.9379
B4GALT1	0.466714	0.549731		BOLA3	10.6632	9.69032	8.96961
B4GALT2	12.405	14.8206		BOLA3-AS1	6.69802	7.83893	6.6083
B4GALT3	10.3898	16.1901		BOP1	7.60608	7.04833	7.53666
B4GALT4	0.6499	0.836761		BORA	2.05998	1.98122	1.88708
B4GALT5	0.546256	0.564241		BORCS5	0.136457	0.150537	0.115233
B4GALT6	0.00216753	0.00244468		BORCS6	10.3621	8.08691	7.51186
B4GALT7	2.56101	2.35879		BORCS7	2.30584	2.03592	1.79606
B4GAT1	8.2634	9.71623		BORCS7-ASMT	0.0379813	0.0119161	1.70196e-07
B9D1	0.393356	0.38346		BORCS8	1.10416	1.22169	0.89407
B9D2	0.385272	0.494333		BORCS8-MEF2B	0.104682	0.00897288	0.145301
BAALC-AS1	0.000711083	0.000534671		BPGM	1.98067	2.18674	2.55707
BAAT	0.0209718	0.0224084		BPHL	0.594803	0.562328	0.4133
BABAM1	9.90004	10.4004		BPNT1	4.85861	4.86036	4.46506
BABAM2	0.0386415	0.0504681		BPNT2	8.3104	8.06801	8.73326
BACE1	0.282564	0		BPTF	2.21078	2.0796	2.03606
BACE1-AS	1.77369	1.74623		BPTFP1	0.164777	0.971663	1.06723
BACH1	0.286448	0.277322		BRAF	1.07808	1.01502	1.03621
BACH1-AS1	0.0545148	0		BRAP	3.17964	2.7771	2.9946
BACH1-IT1	0.0772394	0.0606022		BRAT1	6.29669	6.40307	5.22016
BACH1-IT2	0.300295	0.399173		BRCA1	2.61666	2.47991	2.0149
BACH2	0.00949976	0.00619101		BRCA2	1.18715	1.3234	0.783069
BAD	1.99133	2.39853		BRCC3	0.808246	0.838308	0.610704
BAG1	5.34183	4.42896		BRCC3P1	0.268524	0.578244	1.2241
BAG2	6.04575	5.11673		BRD1	1.35618	1.24726	1.39317
BAG3	0.912299	1.24503		BRD2	43.9223	43.9077	44.0594
BAG4	2.88294	2.80954		BRD3	1.95377	1.73685	1.59415
BAG5	9.46452	11.2915		BRD3OS	1.84867	2.05034	1.01969
BAG6	30.3062	31.8583		BRD4	1.40149	1.06551	1.40976
BAGE2	0.499084	0.469566		BRD7	4.50622	4.00739	4.35816
BAHCC1	0.505632	0.559319		BRD7P2	0.801864	0.646566	1.34484
BAHD1	2.27094	2.99975		BRD7P5	0.0700785	0.0754542	0.702818
BAIAP2	0.559581	0.630332		BRD8	7.40666	7.21347	7.50749
BAIAP2-DT	3.30091	3.21622		BRD9	2.39111	2.29413	1.77296
BAIAP2L1	0.315573	0.394542		BRF1	0.62698	0.541871	0.518354
BAIAP2L2	0.00261408	0		BRF2	11.2696	8.50635	10.0523
BAIAP3	0.446979	0.344286		BRI3	0.646519	0.56352	0.893686
BAK1	3.00653	3.55189		BRI3BP	3.54309	3.91726	2.13396
BAK1P1	0.274972	0		BRICD5	2.78076	1.91287	1.92336
BAMBI	7.14219	6.75814		BRINP3	0.0258219	0.0155261	0.0284345
BANCR	0.045372	0.0269334		BRIP1	0.484642	0.469636	0.367376
BANF1	44.805	55.1632		BRIX1	30.9312	27.7487	29.2328
BANF1P3	5.14155	0		BRK1	21.1327	19.3634	21.3497
BANP	0.236735	0.241853		BRME1	0.185393	0.228131	0.1319
BAP1	14.2186	16.2305		BRMS1	8.15938	7.7268	6.40843
BARD1	0.517879	0.471256		BRMS1L	0.0505971	0.037616	0.0624985
BARHL2	0.0358697	0		BROX	13.5441	13.2475	14.1051
BARX1	0.0369631	0		BRPF1	7.2498	6.27851	6.88856
BARX1-DT	0	0		BRPF3	1.76044	1.762	2.04425
BATF	0.0308934	0.0871092		BRSK1	0.431319	0.396773	0.355067
BATF2	1.51522	1.3449		BRSK2	0.0105246	0.0132206	0.00639707
BATF3	0.238727	0.182397		BRWD1	3.23706	3.4113	3.12364
BAX	5.9997	6.62774		BRWD1-AS2	1.61467	2.00599	1.69862
BAZ1A	1.34444	1.46645		BRWD3	0.851373	0.817762	0.718171
BAZ1B	5.85	6.15478		BSCL2	1.59593	1.73382	1.43978
BAZ2A	3.07209	3.6271		BSDC1	13.248	12.5332	11.6571
BAZ2B	0.143914	0.131336		BSG	49.8391	56.2049	44.0168
BBC3	3.95217	3.08772		BSG-AS1	0.356159	0.410871	0.538509
BBIP1	0.56783	0.520174		BSN	0.0523501	0.052843	0.0596614
BBOF1	0.0673043	0.049564		BSN-DT	0.252288	0.217313	0.138011
BBOX1-AS1	0.011956	0.0062929		BSPRY	0.241322	0.101399	0.155624
BBS1	0.473693	0.730226		BST2	37.8972	44.2254	29.1462
BBS10	4.54556	4.07185		BTAF1	2.82552	2.9197	2.51819
BBS12	0.72065	0.733419		BTBD1	7.7997	7.66221	7.31734
BBS2	0.0910549	0.0842608		BTBD10	0.63426	0.615352	0.576728
BBS4	1.0022	0.956444		BTBD10P2	1.68687	0.838277	1.18305
BBS5	0.387448	0.525273		BTBD19	0.323521	0.445099	0.147482
BBS7	0.501664	0.442039		BTBD2	1.46679	1.46531	1.47141
BBS9	0.00359122	0.0016708		BTBD3	1.55481	1.35229	1.33278
BBX	0.14971	0.132872		BTBD7	0.418291	0.424478	0.431323
BCAM	0.0139498	0.0377604		BTBD8	0.195644	0.240932	0.108139
BCAN	0.342345	0.0107107		BTBD9	0.0102861	0.0171957	0.0106121
BCAN-AS1	1.4545	1.82142		BTD	0.131936	0.134101	0.132805
BCAP29	1.39978	1.17509		BTF3	170.626	159.5	160.349
BCAP31	7.83397	8.46257		BTF3-DT	2.23102	3.69563	2.50349
BCAR1	0.844025	1.18896		BTF3L4	5.60817	5.31923	4.69882
BCAR3	0.0142467	0.0106214		BTF3L4P2	36.1229	25.6053	24.1346
BCAS1	0.0329607	0.0397891		BTF3P6	1.02351	1.37753	0.699873
BCAS2	5.20814	3.94368		BTG1	53.691	46.3854	76.9875
BCAS2P2	2.01068	0		BTG2	23.9095	22.6343	32.9532
BCAS3	0.00910378	0.00733418		BTG3	2.62739	2.5439	2.84925
BCAS4	0.0367271	0.0307012		BTG3-AS1	0.410614	0.448519	0.319
BCAT1	3.27852	3.10129		BTK	3.85981	3.5741	3.22632
BCAT2	4.89214	5.4228		BTN2A1	2.30564	2.65589	3.22158
BCCIP	5.34837	5.62284		BTN2A2	3.79396	3.55269	3.73579
BCDIN3D	1.45697	1.44148		BTN2A3P	0.847891	0.862908	0.751867
BCDIN3D-AS1	0.248262	0.085185		BTN3A1	2.32035	1.95402	2.26994
BCKDHA	2.25663	2.06937		BTN3A2	1.79275	1.81392	1.70882
BCKDHB	0.0844129	0.0768787		BTN3A3	0.339921	0.286348	0.331428
BCKDK	7.17528	8.59849		BTNL9	7.10449	7.64947	5.96644
BCL10	2.16395	2.43062		BTRC	0.349843	0.351656	0.277732
BCL11A	0	0		BUB1	18.2283	18.443	17.8139
BCL2	0.0162853	0.0183676		BUB1B	5.85725	5.47837	5.0494
BCL2A1	0.0234073	0		BUB3	37.416	36.2218	33.9975
BCL2L1	5.05079	6.60693		BUD13	2.90679	2.6534	2.92227
BCL2L11	0.311673	0.335835		BUD23	8.62295	7.62003	7.14652
BCL2L12	13.5475	14.7046		BUD31	27.2211	26.228	26.0182
BCL2L13	1.37968	1.49057		BVES	0.0126619	0.0340831	0.00865819
BCL2L15	0.0672149	0.0577595		BYSL	5.15244	4.52386	4.7077
BCL2L1-AS1	0.0202633	0		BZW1	22.2079	24.4508	18.6713
BCL2L2	3.3645	3.35643		BZW1P2	0.855109	1.47346	1.30869
BCL2L2-PABPN1	0.67627	0.727647		BZW2	7.50543	7.20702	6.61813
BCL3	0.0418867	0.132279		C10orf143	0.00843665	0.00302794	0.00640994
BCL6	0.0537778	0.172385		C10orf55	0.0199365	0.0429315	0.0485179
BCL6B	1.99396	1.84637		C10orf71	0.265978	0.266965	0.2425
BCL7A	1.29192	1.70236		C10orf71-AS1	0.527071	0.472919	0.200227
BCL7B	1.65228	1.66317		C10orf88	1.26396	1.25381	1.02135
BCL7C	2.38013	2.04902		C10orf88B	0.446742	0.482743	0.292662
BCL9	0.0907202	0.118362		C10orf95	0.299199	0.402687	1.37906
BCL9L	0.333765	0.470473		C10orf95-AS1	8.97888	8.35262	5.80234
BCLAF1	14.5161	12.9139		C11orf1	4.13461	4.51034	4.13336
BCLAF1P2	12.3947	3.63672		C11orf21	0.137627	0.148184	0.0941085
BCLAF3	0.0881883	0.0920217		C11orf24	10.5485	10.1974	6.91006
BCO2	0.0015418	0.00632079		C11orf49	0.0992543	0.124981	0.118101
BCOR	2.53318	2.86075		C11orf52	0.0628661	0.171069	0.171193
BCORL1	0.250275	0.314091		C11orf54	4.30656	3.56715	3.93672
BCR	2.86385	3.24866		C11orf58	2.67134	2.44359	2.35617
BCRP2	0.119621	0.0330068		C11orf65	0.0128476	0.0121039	0.0183023
BCRP3	0.0485974	0.100518		C11orf68	16.0383	13.7294	17.3094
BCRP8	0.405398	0		C11orf71	2.71726	2.60736	1.74492
BCS1L	8.45017	9.20965		C11orf80	0.181006	0.176045	0.168301
BCYRN1	445.036	1686.74		C11orf95	4.67098	4.64242	3.13176
BDH1	0	0.00305826		C11orf96	0.626809	0.897382	0.40192
BDH2	0.302247	0.26167		C11orf98	33.9351	30.128	28.266
BDNF	0	0		C12orf29	6.20612	6.21872	5.48124
BDNF-AS	0.00774145	0.0052794		C12orf4	0.965658	0.928721	0.72451
BDP1	2.01065	1.76808		C12orf40	0.0669791	0.0745534	0.0668434
BECN1	4.29124	3.47018		C12orf43	1.71392	2.22305	1.32278
BEGAIN	0.0119906	0.00695853		C12orf45	0.572439	0.55847	0.482177
BEND3	0.482647	0.50498		C12orf56	0.0172275	0.0174579	0.012935
BEND3P1	5.09395	0.0603761		C12orf57	22.237	20.9896	22.1676
BEND3P3	1.24589	0		C12orf60	0.0310148	0.0333939	0.0248838
BEND6	0.0357754	0.0344318		C12orf65	2.94196	3.14537	2.29749
BEND7	0.133279	0.113815		C12orf66	0.532294	0.645721	0.34295
BEST1	0.647779	0.0955716		C12orf73	0.721691	0.650298	1.01855
BET1	0.516623	0.752628		C12orf75	0.0238203	0.0119688	0.0267851
BET1-AS1	0.00992287	0		C12orf76	1.35335	1.07665	1.39581
BET1L	1.17701	1.43293		C14orf119	25.1911	26.2073	22.8406
BEX1	0	0		C14orf28	0.153481	0.247881	0.163255
BEX2	6.55173	5.35503		C14orf39	0.00428916	0.0115455	0.0117317
BEX4	136.853	136.568		C14orf93	1.62017	1.46693	1.2326
BEX5	0.925986	0.359543		C15orf39	3.9633	3.4937	3.78955
BFAR	2.40508	2.31012		C15orf40	2.03073	1.99097	1.38489
BFSP1	0.00183009	0.0082564		C15orf61	3.92283	3.21736	4.15622
BGLAP	0.454526	0		C15orf62	0.620322	0.779224	1.09518
BGLT3	8.12021	4.30528		C15orf65	0.470881	0.386922	0.418018
BHLHA15	1.34814	2.25318		C16orf46	0.0320724	0.00359368	0.0607661
BHLHB9	0.0492423	0.0805481		C16orf70	0.896334	0.950847	0.96871
BHLHE40	19.1924	22.1884		C16orf72	27.0564	27.4912	22.042
BHLHE40-AS1	0.0157108	0.0106917		C16orf86	0	0.565751	0.239531
BICD1	0.0739474	0.0738549		C16orf87	1.24441	1.12119	1.59916
BICD2	1.86375	2.01843		C16orf91	27.3153	32.5568	25.7149
BICDL1	0.0108686	0.010401		C16orf95	0.0575055	0.0534291	0.0571718
BICDL2	0.0186003	0.0209786		C16orf95-DT	1.90928	0.770902	1.08797
BICRA	0.038778	0.0490502		C17orf100	0.0184865	0.0165871	0.0337093
BICRAL	0.218195	0.234271		C17orf107	0.217827	0.156358	0.124625
BID	2.87573	3.35916		C17orf113	0.46449	0.333413	0.22586
BIK	0.0272574	0.0307427		C17orf49	11.4581	9.33224	11.1245
BIN1	0.0348879	0.049842		C17orf58	9.81812	9.49621	7.99779
BIN2	0.00236934	0.0106892		C17orf67	0.0381461	0.0410722	0.0273262
BIN3	1.42125	1.24975		C17orf75	2.61294	2.23018	2.54233
BIRC2	1.67037	1.80117		C17orf80	4.98458	5.10394	3.45193
BIRC3	0.0392398	0.0407167		C17orf99	0.805063	0.963903	0.557839
BIRC5	23.8451	22.9503		C18orf21	7.20621	7.33813	7.34743
BIRC6	1.68207	1.73804		C18orf25	0.953793	0.921031	1.1686
BIRC6-AS2	0.0196391	0		C18orf32	1.07133	1.11924	0.679097
BIRC7	0	0.00842509		C18orf54	1.34167	1.20299	1.03144
BISPR	0.879873	0.854864		C19orf12	1.87134	1.95779	1.49893
BIVM	1.18039	0.92258		C19orf25	3.09372	2.76065	1.90618
BIVM-ERCC5	0.0307964	0.120148		C19orf38	0.0192201	0.0289722	0.0175235
BLACAT1	0.215688	0.161011		C19orf44	0.491108	0.660976	0.501627
BLACE	0	0		C19orf47	0.90724	0.863028	0.754881
BLCAP	1.15543	1.28234		C19orf48	31.3287	28.7855	26.6624
BLM	1.23829	1.15705		C19orf53	19.457	17.9568	17.416
BLMH	2.67317	2.94496		C19orf54	2.1364	2.04327	2.24163
BLNK	0.00627155	0		C19orf67	0.300289	0.0969973	0.328539
BLOC1S1	12.1111	12.5487		C19orf73	3.78575	4.44671	3.76536
BLOC1S2	2.70764	3.14666		C19orf81	0.970628	0.863937	0.731559
BLOC1S3	0.23665	0.277097		C19orf84	0.332652	0.716339	0.353837
BLOC1S4	31.8241	33.391		C1D	1.0183	1.11426	1.09378
BLOC1S5	0.975546	0.970359		C1DP1	10.5377	6.87905	8.61191
BLOC1S5-TXNDC5	0.0824149	0.00264695		C1GALT1	1.8592	1.71541	1.67603
BLOC1S6	4.58705	3.84968		C1GALT1C1	7.8982	6.99783	6.24444
BLVRA	1.12447	0.877715		C1GALT1C1L	2.2961	3.54711	2.54851
BLVRB	28.0997	30.4022		C1orf100	0.203443	0.19306	0.138328
BLZF1	1.74278	1.39022		C1orf109	10.1621	10.1435	8.06602
BMERB1	0.00976509	0.00754643		C1orf112	0.547763	0.528224	0.499717
BMF	0.116779	0.0555134		C1orf116	1.02254	1.33276	0.670587
BMI1	15.7747	16.0326		C1orf122	17.2754	19.1558	18.4181
BMP1	1.03843	1.07155		C1orf131	3.34137	3.10853	2.89277
BMP10	0.246393	0.207497		C1orf159	1.85182	1.82274	1.47942
BMP2	0.00274332	0		C1orf162	0.730236	0.640649	0.690435
BMP2K	2.19521	2.11448		C1orf167	0.0597101	0.0593449	0.0904941
BMP6	0.0106309	0.00149836		C1orf174	11.1576	11.5826	12.7262
BMP8A	0.00585813	0.0010165		C1orf198	2.59526	2.1254	2.3841
BMP8B	0.0908129	0.0306661		C1orf21	0.00211054	0.00454488	0.00048106
BMPR1A	0.197494	0.178858		C1orf216	11.1958	10.082	7.70205
BMPR1AP1	0.0431274	0.048642		C1orf226	0.352362	0.343391	0.335861
BMPR2	0.0680445	0.0605028		C1orf229	0.508923	0.365308	0.773332
BMS1	5.83983	5.38346		C1orf35	9.37323	9.32947	8.71975
BMS1P1	0.55657	0.329844		C1orf43	30.3134	28.5169	26.7194
BMS1P17	0.0697456	0		C1orf50	2.71561	2.17148	2.28666
BMS1P2	0.385563	0.143786		C1orf52	5.10995	5.71408	5.64097
BMS1P22	0.070199	0		C1orf53	0.107795	0.232127	0.0737097
BMS1P4	0.637572	0.313445		C1orf54	0.0803227	0.0972947	0.113779
BMS1P4	0.0514972	0.11651		C1orf56	0.663132	0.941182	2.03835
BMS1P4-AGAP5	0.116008	0.11716		C1orf74	6.08355	6.16491	3.43552
BMS1P7	0.139722	6.53236e-18		C1QBP	31.4954	32.8846	26.7718
BMS1P8	0.229245	0.0962528		C1QL4	0.881494	0.949112	0.608851
BMT2	0.104465	0.0840208		C1QTNF12	0.417948	0.610725	0.734892
BMX	0.014936	0.0151612		C1QTNF3	0.0251434	0.0219778	0.00918223
BNIP1	0.969186	1.04829		C1QTNF5	0.127747	0.550185	0.582352
BNIP2	3.6022	2.90953		C1QTNF6	0.212584	0.278961	0.199875
BNIP3	5.85303	6.89168		C1R	0.05179	0.178441	0.0661058
BNIP3L	0.556591	0.513305		C1RL	0.9291	0.909427	0.545961
BNIP3P1	0.114007	0.0498754		C1RL-AS1	0.821766	0.827719	0.595316
BNIP3P10	1.19441	0		C1S	0.00462765	0.0166088	0.0126575
BNIP3P25	0.801368	0		C2	0.0293291	0.0258373	0.0218784
BNIP3P41	3.11436	0.94424		C20orf144	0.155096	0.125245	0.636326
BNIP3P42	0.726724	0		C20orf194	0.194309	0.159732	0.143343
BNIP3P5	0.147681	0.333277		C20orf202	0.211659	0.142434	0.168853
BNIPL	0.19043	0.0954578		C20orf203	0.0693019	0.115717	0.0407066
BOD1	2.64733	2.70401		C20orf204	0.363575	0.538264	0.352199
BOD1L1	1.9482	1.73083		C20orf27	4.28472	4.04516	3.71892
BOK	0.382013	0.287533		C20orf96	0.275676	0.317532	0.239652
BOLA1	0.0213739	0.0361282		C21orf58	3.36249	3.78868	1.99466
BOLA2	0.627223	0.221164		C21orf62-AS1	0.0327325	0.0307442	0.0253984
BOLA2B	130.169	105.184		C21orf91	1.53658	1.53692	1.09855
BOLA2P2	1.3978	0		C22orf15	0	0	0.405053
BOLA2-SMG1P6	5.49888	8.14902		C22orf23	0.0360687	0.116506	0.138714
BOLA3	7.10519	6.31133		C22orf24	0.0319208	0.0137477	0.104771
BOLA3-AS1	2.77697	2.62974		C22orf34	0.0903694	0.0876845	0.0914938
BOP1	7.99981	8.55206		C22orf39	2.83306	2.56252	2.62121
BORA	1.04966	0.920736		C22orf46	1.36508	1.51433	0.792005
BORCS5	0.145495	0.145034		C2CD2	0.702279	0.748168	0.655492
BORCS6	10.6026	10.69		C2CD2L	7.49055	6.99709	7.06921
BORCS7	1.07905	0.945887		C2CD3	0.376218	0.336553	0.338602
BORCS7-ASMT	0.00274036	0.0167374		C2CD5	0.585434	0.548683	0.505855
BORCS8	2.18799	2.42285		C2orf15	0.0256314	0.0827928	0.0701068
BORCS8-MEF2B	0.0447367	0.040969		C2orf16	0.0253473	0.0212269	0.0513553
BPGM	0.828944	0.814838		C2orf27A	0.0476251	0.0759945	0.0464762
BPHL	0.287769	0.264951		C2orf42	0.18364	0.240893	0.213415
BPI	0	0		C2orf49	7.70688	7.70956	7.78408
BPNT1	2.21915	1.8772		C2orf49-DT	5.1088	5.62027	3.67902
BPNT2	3.70123	4.08797		C2orf68	15.349	17.1317	12.0291
BPTF	0.87842	0.829518		C2orf69	1.08397	1.07474	1.18647
BPTFP1	0.130022	0.0845326		C2orf76	0.0988106	0.104262	0.117115
BRAF	0.422121	0.422481		C2orf78	0.046488	0.0542252	0.0141281
BRAFP1	0.109548	0		C2orf88	0.753385	0.697837	0.59199
BRAP	2.04186	1.7059		C2orf92	0.0821683	0.0920103	0.0659254
BRAT1	8.13241	8.15769		C3	0.149763	0.200264	0.160769
BRCA1	1.47163	1.59132		C3AR1	0.845317	0.852372	0.526033
BRCA2	0.822814	0.730002		C3orf18	0.490975	0.412337	0.304393
BRCC3	0.439591	0.535672		C3orf33	0.771625	0.521696	0.802216
BRCC3P1	1.70301	0.32694		C3orf35	0.0453504	0.05813	0.0511919
BRD1	0.743441	0.860003		C3orf38	2.89092	2.31437	2.80938
BRD2	22.0829	26.8823		C3orf52	0.165785	0.178502	0.140727
BRD3	1.21008	1.37238		C3orf62	0.709597	0.764029	0.620003
BRD3OS	2.27495	2.87277		C3orf86	1.54481	1.38561	1.23711
BRD4	0.68934	0.970948		C4A	0.476346	0.55026	0.35852
BRD7	2.64277	2.40746		C4B	0.458471	0.416537	0.234135
BRD7P2	2.8771	0.419837		C4orf3	27.6301	26.5463	24.0595
BRD7P3	0.233303	0		C4orf33	3.46525	3.24773	2.95616
BRD7P4	0.747136	0.0255354		C4orf46	14.5276	13.9423	11.7928
BRD7P5	0.35934	0		C4orf47	0.0216614	0.0291538	0.014812
BRD8	3.15795	2.84366		C4orf48	6.41656	6.7692	6.08652
BRD9	3.08181	2.95467		C5	0.0365028	0.0350919	0.0320921
BRF1	0.551355	0.522444		C5AR1	0.0478154	0.0171611	0.0108987
BRF2	5.74209	5.60515		C5AR2	0.0758263	0.0635	0.0153629
BRI3	0.135749	0.107097		C5orf15	12.2882	11.7898	11.7429
BRI3BP	2.78894	3.34186		C5orf22	5.37831	5.02399	4.89333
BRI3P1	2.0967	0		C5orf24	7.22408	7.51157	7.02316
BRICD5	1.83447	1.34017		C5orf34	1.81827	1.90941	1.54577
BRINP3	0.00027151	0.000408302		C5orf47	0.0157818	0.0127443	0.0107916
BRIP1	0.329415	0.289978		C5orf51	10.5811	9.88004	10.0874
BRIX1	19.652	17.4855		C5orf58	0.0570891	0.0682982	0.1041
BRK1	9.91933	9.99297		C5orf63	0.429042	0.408465	0.362347
BRME1	0.446654	0.27087		C5orf66	0.0153248	0.00846171	0.0286452
BRMS1	13.1902	12.7921		C6orf120	45.3378	47.7331	28.8772
BRMS1L	0.0260886	0.0300687		C6orf132	0.0523014	0.0530008	0.0336598
BROX	4.86403	4.97914		C6orf136	5.37874	4.76672	6.16766
BRPF1	8.33183	9.42575		C6orf163	0.166938	0.126486	0.101468
BRPF3	0.845051	0.977904		C6orf223	0.181548	0.0977374	0.0496569
BRSK1	0.17178	0.223061		C6orf47	29.592	33.4135	20.9739
BRSK2	0.00331376	0.00106785		C6orf52	0.152914	0.188164	0.124478
BRWD1	1.89098	1.5262		C6orf62	15.8739	18.5537	11.5441
BRWD1-AS2	3.28499	2.07935		C6orf89	11.5148	10.7585	9.64422
BRWD1-IT1	0.266729	0.128929		C6orf99	0.0933166	0.0502374	0.0496296
BRWD3	0.232467	0.19879		C7orf25	1.22935	0.607476	0.747637
BSCL2	0.785322	1.50873		C7orf26	1.58358	1.43313	1.61182
BSDC1	6.05052	6.67836		C7orf31	0.100659	0.10838	0.0688302
BSG	48.856	57.5978		C7orf50	0.900177	0.75222	1.05062
BSG-AS1	0.88874	1.10733		C7orf61	0.200248	0.125945	0.152352
BSN	0.0641653	0.0753576		C8G	0.570332	0.383801	1.03998
BSN-DT	0.0340435	0.10751		C8orf33	9.48129	9.49321	10.4452
BSPRY	0.0174732	0.0125411		C8orf37	0.56248	0.498086	0.373838
BST1	0	0		C8orf44	0.810898	0.819504	0.525301
BST2	60.1376	68.2464		C8orf58	2.15984	2.00894	1.40652
BTAF1	1.46362	1.4316		C8orf76	2.52361	2.43494	2.26216
BTBD1	5.31073	5.15128		C8orf82	10.6653	11.2408	8.66244
BTBD10	0.425643	0.360826		C8orf88	4.79861	4.37064	4.03112
BTBD10P2	0.945517	0.947925		C9orf116	0.409116	0.37757	0.195382
BTBD11	0	0		C9orf147	0.0160163	0.0203803	0.0147874
BTBD18	0.229225	0		C9orf16	44.0261	40.2665	44.2185
BTBD19	0.247382	0.0984754		C9orf163	1.04211	1.33577	0.604107
BTBD2	0.35875	0.352146		C9orf40	9.60144	9.75156	7.52174
BTBD3	0.627259	0.648706		C9orf43	0.039013	0.0140019	0.0177846
BTBD6	0.534497	0		C9orf64	4.15675	4.11489	3.1665
BTBD6P1	0	0		C9orf72	0.721468	0.64015	0.703462
BTBD7	0.306202	0.359186		C9orf78	24.7503	24.9011	21.7646
BTBD8	0.0511498	0.0405692		C9orf85	0.268915	0.239749	0.26704
BTBD9	0.00840106	0.00856894		CA1	0.958735	0.644505	1.00771
BTD	0.104153	0.0632911		CA11	1.78155	2.28517	2.16101
BTF3	56.1248	51.6136		CA12	0.092908	0.0909408	0.0770062
BTF3-DT	1.57473	1.82832		CA13	0.392178	0.268515	0.304384
BTF3L4	1.84236	1.8152		CA2	0.0437121	0.0627536	0.0199268
BTF3L4P2	4.3309	6.94387		CA3	0.0135105	0.00727346	0.00461923
BTF3P10	2.29726	0		CA5B	0.0603014	0.0642123	0.0470229
BTF3P3	0.166468	0.56326		CA5BP1	0.877901	0.74718	0.615021
BTF3P6	1.79545	2.25868		CA8	1.62282	1.37207	1.93557
BTG1	3.73016	3.93592		CA9	1.62204	2.42987	1.12062
BTG2	4.79339	5.57645		CAAP1	1.11468	1.11577	0.743784
BTG3	1.10326	1.22681		CAB39	4.28344	3.94265	3.99351
BTG3-AS1	0.503168	0.175704		CAB39L	0.178208	0.1533	0.140126
BTK	2.05	1.95874		CABIN1	1.37874	1.37201	1.15204
BTN1A1	0.0306361	0.00383927		CABLES2	0.663946	0.56748	0.873685
BTN2A1	1.08063	0.980033		CACFD1	0.3754	0.341041	0.235306
BTN2A2	1.60022	1.09214		CACNA1F	0.0180413	0.0242816	0.0164488
BTN2A3P	0.664538	0.378291		CACNA1H	0.0241732	0.0260275	0.0152581
BTN3A1	0.574279	0.714695		CACNA1I	0.16848	0.158295	0.106645
BTN3A2	0.678673	0.653917		CACNB1	0.226398	0.340137	0.230415
BTN3A3	0.094732	0.066056		CACNB2	0	0	0.00841075
BTNL10	0	0.165295		CACNB3	0.118007	0.0726049	0.146015
BTNL3	0.00192701	0.0282543		CACTIN	5.35335	5.04987	4.30155
BTNL8	0.00864296	0		CACTIN-AS1	0.305645	0.267386	0.164873
BTNL9	3.52889	2.99649		CACUL1	2.14162	2.16517	2.46227
BTRC	0.0995004	0.0839285		CACYBP	46.627	47.553	40.4492
BUB1	6.65782	6.25692		CACYBPP2	1.88323	0.811076	3.09059
BUB1B	3.44983	3.05026		CAD	10.4932	10.1032	9.9
BUB3	15.7577	21.1645		CADM2	0.00377747	0.00369748	0.00313093
BUD13	2.10074	1.95749		CADM4	0.167975	0.353857	0.199758
BUD23	8.75587	7.53694		CADPS2	0.000224656	0.00145133	0.000614476
BUD31	21.1891	16.0582		CAHM	5.27263	3.37556	2.59849
BVES	0.00170859	0.00192706		CALB1	1.52729	1.15223	1.39563
BVES-AS1	0.00614513	0		CALCOCO1	3.33334	3.28877	3.07543
BYSL	4.69972	5.71126		CALCOCO2	8.68121	7.50019	7.64277
BZW1	18.9789	15.8873		CALCR	0.00509899	0.00274507	0.00232445
BZW1P2	2.10296	0.889318		CALCRL	0.00839255	0.00387271	0.00437241
BZW2	3.67503	3.26015		CALHM2	0.0227315	0	0.239679
C10orf105	5.30739e-05	0.00148771		CALHM5	0.145646	0.146364	0.0442632
C10orf143	0.000379477	0.001284		CALM1	17.329	17.6885	13.6426
C10orf55	0.0170433	0.0303419		CALM2	64.6638	63.2477	60.3669
C10orf71	0.214128	0.315607		CALM2P2	4.06264	4.99918	4.76232
C10orf71-AS1	0	0.133694		CALM3	46.4226	42.8326	40.5332
C10orf88	0.78803	0.571079		CALML4	0.599659	0.637805	0.196674
C10orf88B	0.23225	0.162151		CALN1	0.0258173	0.0214145	0.0181333
C10orf95	3.83008	0.683039		CALR	348.001	318.179	408.204
C10orf95-AS1	3.94081	4.5195		CALU	51.5003	51.3069	51.8319
C11orf1	1.69328	1.6449		CAMK1	1.13083	1.26106	0.967456
C11orf16	0.0373075	0		CAMK1D	0.000262723	0.000565752	0.00167672
C11orf21	0.701062	0.418916		CAMK2A	0.00180846	0.00584157	0.0115418
C11orf24	5.91656	6.77874		CAMK2G	1.82196	1.66281	1.69981
C11orf49	0.0562972	0.0733954		CAMK2N1	0.0334249	0.251922	0.0914232
C11orf52	0.0584709	0.131895		CAMK4	0.000470749	0.00152058	0.00515034
C11orf54	0.936451	0.894137		CAMKK1	0.387735	0.341934	0.262607
C11orf58	1.57973	1.19825		CAMKK2	1.11607	1.06111	0.808285
C11orf65	0.00889772	0.00611034		CAMKMT	0.0223871	0.0227653	0.0215449
C11orf68	4.54252	6.84838		CAMKV	0.0641194	0.0805442	0.038973
C11orf71	2.1098	2.08703		CAMLG	9.82175	8.85457	11.3746
C11orf72	0.00900414	0		CAMSAP1	1.84577	1.67371	1.86265
C11orf80	0.205777	0.15966		CAMSAP2	0.408934	0.355191	0.270979
C11orf94	1.72294	0.102276		CAMSAP3	0.199131	0.220532	0.233426
C11orf95	4.75923	3.8585		CAMTA1	0.0491661	0.0505631	0.0379662
C11orf96	0.438705	0.635273		CAMTA1-DT	0.536483	0.433227	0.366845
C11orf98	43.704	67.094		CAMTA2	1.4595	1.37589	1.31802
C12orf29	3.64925	3.41602		CAND1	14.4475	13.6509	15.0289
C12orf4	0.639986	0.508258		CAND2	0.602492	0.632311	0.511404
C12orf40	0.0398165	0.0235558		CANT1	5.00828	5.36975	3.94411
C12orf43	2.97901	2.75405		CANX	61.5913	58.5802	60.2231
C12orf45	0.919828	0.74119		CAP1	27.4289	25.5304	24.6601
C12orf56	0.00601676	0.00370151		CAP1P1	0.814421	0.584596	6.93028
C12orf57	17.512	16.7867		CAP1P2	1.81239	0.585426	1.81765
C12orf60	0.00602655	0.0147271		CAPG	3.16511	3.34405	3.07745
C12orf65	1.88419	1.83505		CAPN1	10.985	9.9169	9.70072
C12orf66	0.327531	0.402897		CAPN10	1.26562	1.29168	1.19636
C12orf71	0.249045	0		CAPN10-DT	3.28784	3.26509	2.59017
C12orf73	0.968083	0.470505		CAPN11	0.0498937	0.0376047	0.0409406
C12orf75	0.000428571	0.000241685		CAPN12	0.273253	0.325366	0.185671
C12orf76	0.362586	0.373581		CAPN15	5.17374	5.36632	4.27711
C13orf46	0.00676592	0		CAPN2	6.64945	6.35423	6.78685
C14orf119	7.68353	9.19828		CAPN3	0.0167212	0.00257198	0.025994
C14orf28	0.0862938	0.1129		CAPN5	0.161774	0.264759	0.210425
C14orf39	0.00408327	0.00783337		CAPN6	0.0452688	0.0433256	0.0137576
C14orf93	1.29862	1.25531		CAPN7	3.77875	3.42188	3.73145
C15orf39	2.34771	3.43333		CAPNS1	27.0931	23.6201	23.8062
C15orf40	1.22834	1.15082		CAPNS2	0.508697	0.821578	0.231897
C15orf61	2.15542	2.23723		CAPRIN1	22.4796	20.8892	21.9395
C15orf62	1.60436	0.267491		CAPRIN2	0.888719	0.932666	1.06668
C15orf65	0.157178	0.120699		CAPS	1.071	1.08223	1.56765
C16orf46	0.0285698	0.00470004		CAPS2	0.00999693	0.0167437	0.0131654
C16orf54	0	0.0110161		CAPZA1	22.6525	21.0443	21.3515
C16orf70	0.790428	1.00273		CAPZA2	4.80914	4.6057	5.28868
C16orf72	13.6128	12.6006		CAPZB	1.16316	1.12781	1.15809
C16orf74	0	0		CARD10	0.214402	0.244982	0.151594
C16orf86	1.099	0.379853		CARD11	0.726832	0.840481	0.651491
C16orf87	0.494289	0.359673		CARD18	0.0217135	0.0205876	0.017433
C16orf91	38.2652	38.014		CARD19	0.980048	0.837737	0.825329
C16orf95	0.0354721	0.0325029		CARD6	2.82191	3.06024	1.93732
C16orf95-DT	0.64409	0.145289		CARD8	0.922249	0.802807	0.658865
C17orf100	0.00249455	0.0300108		CARD8-AS1	13.097	13.0127	16.3208
C17orf107	0.0587867	0.121557		CARD9	5.4916	5.77988	3.72257
C17orf113	0.281353	0.23564		CARF	0.160443	0.137235	0.0976618
C17orf49	6.91541	7.97192		CARHSP1	8.2389	7.23701	8.11848
C17orf58	9.23218	8.70498		CARM1	3.29844	3.20192	3.00421
C17orf67	0.0588273	0.0522501		CARMIL1	0.00112182	0.003221	0.00136373
C17orf75	0.9082	1.05028		CARMIL2	0.466811	0.50262	0.32383
C17orf80	2.7038	2.69525		CARMN	0.0488328	0.0578365	0.0578789
C17orf97	0.00830814	0.0224891		CARNMT1	2.11224	2.09532	1.89157
C17orf99	0.686569	0.495981		CARS1	9.06075	7.98789	7.10871
C18orf21	4.28277	5.02672		CARS1-AS1	0	0	0.143526
C18orf25	0.464664	0.467095		CARS2	0.730456	0.714124	0.622439
C18orf32	0.124608	0.467543		CASC15	0.00606006	0.0054143	0.00423201
C18orf54	0.446616	0.542143		CASC2	0.00701213	0.0092278	0.0028414
C19orf12	1.22475	1.5105		CASC3	6.89434	5.57179	6.88888
C19orf25	6.08849	6.03712		CASC9	0.0187187	0.0254896	0.021082
C19orf33	1.08392	0		CASD1	0.347248	0.483174	0.392092
C19orf38	0.00207483	0.00468027		CASK	0.0259353	0.0252332	0.020797
C19orf44	0.30904	0.436002		CASKIN1	0.374649	0.452927	0.4025
C19orf47	1.23135	1.27888		CASKIN2	1.19517	1.32285	1.11075
C19orf48	43.6396	45.507		CASP10	2.35826	2.15192	1.71456
C19orf53	21.2593	27.6681		CASP2	4.10928	3.97994	4.23056
C19orf54	0.557242	0.799241		CASP3	5.26793	4.84015	4.22659
C19orf67	0.251228	0.265071		CASP6	2.45774	2.4625	2.17855
C19orf71	0.473081	0		CASP7	0.439214	0.433055	0.35545
C19orf73	5.34065	3.29985		CASP8	0.903467	0.901841	0.478357
C19orf81	1.91749	1.16996		CASP8AP2	3.42546	3.23144	2.4645
C19orf84	0.688279	0.995671		CASP9	2.24589	1.80207	1.61398
C1D	0.382637	0.268307		CASS4	2.63956	2.45189	1.90259
C1DP1	2.61064	3.28708		CAST	1.80182	1.64057	1.70545
C1GALT1	0.508897	0.491306		CASTOR1	0.650954	0.732081	0.567217
C1GALT1C1	3.54734	3.30011		CASTOR2	1.16673	1.25327	1.11458
C1GALT1C1L	1.58958	0.577352		CASTOR3	0.144515	0.157521	0.128517
C1orf100	0.0623495	0.0797681		CASZ1	0.0255291	0.0188976	0.0254645
C1orf109	6.68206	7.7075		CAT	14.9241	13.06	16.2248
C1orf112	0.261956	0.263452		CATIP	0.0113567	0.0244557	0.0771217
C1orf116	0.447831	0.480522		CATIP-AS1	1.19941	0.352205	0.551904
C1orf122	41.4864	33.2617		CATSPER1	0.105003	0.098925	0.0957338
C1orf127	0	0		CATSPER2	0.104217	0.116967	0.0597208
C1orf131	2.95249	3.05121		CATSPER2P1	0.0696919	0.0545086	0.0534548
C1orf147	0.0312646	0		CATSPERB	0.00446864	0.00343673	0.00232811
C1orf159	1.88834	2.40881		CATSPERG	0.0399361	0.0234543	0.0231706
C1orf162	0.211673	0.0987882		CATSPERZ	0.491868	0.392544	0.369311
C1orf167	0.146575	0.0461363		CAV1	0.0141141	0.0303935	0.0225194
C1orf167-AS1	0.170374	0		CAV2	0.721656	0.718586	0.915878
C1orf174	6.6517	8.0694		CAVIN1	17.3104	17.3565	14.2438
C1orf194	0.0435802	0		CAVIN2	11.2706	12.8667	8.98212
C1orf198	1.31297	1.32857		CAVIN2-AS1	0.0128981	0.0215257	0.0105836
C1orf21	0.000711986	0.00112423		CAVIN4	0.0371496	0.133331	0.0903208
C1orf216	8.94776	8.62805		CBARP	0.786468	0.776231	0.87307
C1orf226	0.414958	0.139128		CBFA2T2	0.220306	0.212282	0.17466
C1orf229	0.732517	0.154909		CBFA2T3	0.354294	0.268642	0.319608
C1orf35	13.891	13.7181		CBFB	3.72552	3.81102	3.10918
C1orf43	16.0235	17.9494		CBL	2.15674	2.15102	2.04748
C1orf50	1.02975	1.50545		CBLB	0.135381	0.109806	0.135393
C1orf52	5.26098	5.30597		CBLL1	10.11	9.39587	7.99676
C1orf53	0.35637	0.114839		CBLN3	0.115812	0.124696	0.214594
C1orf54	0.0669192	0.00611228		CBR1	9.73651	8.43787	8.12395
C1orf56	2.01262	0.550495		CBR4	0.671072	0.739438	0.510922
C1orf74	3.8706	3.36219		CBS	33.0794	35.4776	31.068
C1QBP	27.2596	23.4161		CBSL	3.93004	0.86808	0.606958
C1QBPP2	1.60581	0		CBWD1	1.04241	1.00388	0.85384
C1QL1	0.0320138	0		CBWD2	1.23757	1.5279	1.46902
C1QL3	0.338982	0		CBWD3	0.534233	0.648731	0.421015
C1QL4	0.865075	0.788682		CBWD4P	0.0615699	0.0581016	0.0165956
C1QTNF12	0.104738	0.163565		CBWD5	0.963513	0.774003	0.801704
C1QTNF3	0.0971421	0.076188		CBWD6	0.228424	0.332184	0.193688
C1QTNF3-AMACR	0.00706499	0.00166682		CBX1	6.22026	5.62556	5.80446
C1QTNF5	0.0689521	0.408286		CBX2	5.69874	6.59713	4.53293
C1QTNF6	0.0502002	0.0869507		CBX3	68.0572	71.0468	55.9728
C1QTNF7	0.00421217	0		CBX3P2	0.514532	0.596616	0.433028
C1R	0.117407	0.0346811		CBX3P9	22.6684	29.8864	34.1557
C1RL	0.533396	0.743599		CBX4	12.5144	11.7025	10.0946
C1RL-AS1	0.604689	0.502958		CBX5	16.6923	17.073	15.659
C1S	0.0024978	0.00140859		CBX6	7.95957	8.40506	6.98815
C2	0	0.0040579		CBX7	0.467315	0.405912	0.323574
C20orf144	0.889463	0.106221		CBX8	3.14128	2.86411	3.19305
C20orf194	0.0543981	0.0559547		CBY1	0.949151	0.726549	0.677971
C20orf197	0	0		CC2D1A	3.55437	3.52064	3.1448
C20orf203	0.0925114	0.120686		CC2D1B	5.59156	5.15465	5.00579
C20orf204	0.282098	0.214418		CC2D2A	0.0601144	0.0730774	0.099008
C20orf27	6.47456	8.13293		CCAR1	4.37265	3.89514	4.12527
C20orf96	0.147068	0.103426		CCAR2	13.8626	14.3154	12.4916
C21orf58	2.19012	2.05519		CCDC102A	0.230333	0.236729	0.0906823
C21orf62-AS1	0.00714219	0.00593559		CCDC102B	0.0018778	0.00323494	0.00205445
C21orf91	0.808983	0.686235		CCDC103	0.129141	0.135744	0.0267661
C22orf15	0.515564	0		CCDC106	2.09991	2.32916	1.72213
C22orf23	0.0495526	0.0951496		CCDC107	2.85325	2.04808	2.45849
C22orf24	0.0685774	0.0136027		CCDC110	0.0576642	0.0465657	0.0350494
C22orf34	0.0665018	0.0885987		CCDC112	0.852548	0.810774	1.10873
C22orf39	1.2419	1.47762		CCDC113	0.472631	0.467131	0.301239
C22orf46	1.62991	2.01879		CCDC115	20.0618	19.8992	18.5107
C2CD2	0.625095	0.691488		CCDC116	1.41132	1.99631	1.28674
C2CD2L	2.81544	3.60904		CCDC117	6.38111	7.32534	5.00568
C2CD3	0.276987	0.316328		CCDC12	1.41058	1.34547	1.34786
C2CD4C	0	0.0209911		CCDC120	0.211681	0.227919	0.185848
C2CD5	0.300909	0.36733		CCDC121	4.99383	4.19561	3.53088
C2orf15	0.0760909	0		CCDC124	4.12931	4.00773	3.99811
C2orf16	0.162656	0.0197171		CCDC125	0.720469	0.702601	0.517535
C2orf27A	0.0369595	0.0238145		CCDC126	0.288674	0.342772	0.209078
C2orf42	0.125995	0.109827		CCDC127	2.49536	2.69323	1.89226
C2orf49	3.50784	2.61873		CCDC130	1.34011	1.35572	1.56142
C2orf49-DT	4.33608	3.66225		CCDC134	1.78836	1.68103	1.25697
C2orf50	0.00189438	0.00213661		CCDC136	1.00515	0.963955	0.927558
C2orf68	9.16478	9.72054		CCDC137	10.7412	10.2226	6.85352
C2orf69	0.365593	0.422595		CCDC137P	1.21893	0.492163	1.25025
C2orf76	0.0336002	0.0601531		CCDC138	0.596245	0.612738	0.466966
C2orf78	0.0135916	0.00707514		CCDC14	3.19884	3.24263	3.04905
C2orf81	0	0.0261049		CCDC142	1.6259	1.82488	1.46039
C2orf88	0.373018	0.344518		CCDC144A	0.0337337	0.0485453	0.0675462
C2orf92	0.0434638	0.0350153		CCDC144B	0.0478163	0.0186798	0.0612463
C3	0.0286836	0.0492622		CCDC144CP	0.122954	0.0835139	0.126024
C3AR1	0.47437	0.4901		CCDC144NL	0.181812	0.168122	0.237349
C3orf18	0.190805	0.227158		CCDC144NL-AS1	0.438826	0.470434	0.396574
C3orf20	0.00175997	0		CCDC148	0.00223471	0.00192491	0.00162996
C3orf33	0.257509	0.206901		CCDC15	0.453041	0.341456	0.377074
C3orf35	0.0885876	0.123579		CCDC150	0.18338	0.165279	0.17191
C3orf38	1.38415	1.32097		CCDC152	0.724867	0.834712	0.60348
C3orf52	0.141939	0.125287		CCDC154	0.175699	0.270253	0.205958
C3orf62	0.546586	0.580477		CCDC157	0.057935	0.074855	0.0834953
C3orf70	0.000904158	0.000509885		CCDC159	0.696838	0.576116	0.760126
C3orf80	0.12342	0.264482		CCDC15-DT	0.31657	0.454471	0.168365
C3orf86	0.488888	0.541052		CCDC162P	0.0256401	0.0268804	0.030759
C4A	0.150928	0.0339952		CCDC163	2.69174	3.03096	2.4354
C4A-AS1	0.136047	0.00548011		CCDC167	1.89762	1.88103	1.99101
C4B	0.248714	0.390005		CCDC168	0.0300876	0.0231397	0.0235129
C4B-AS1	0.136047	0.00548011		CCDC169	0.481435	0.459907	0.457357
C4orf3	4.29716	4.39633		CCDC17	0.954283	1.13023	0.522028
C4orf33	0.989563	0.759835		CCDC171	0.00376557	0.00243265	0.00480644
C4orf36	0.0254967	3.41273e-07		CCDC173	0.125126	0.157178	0.194888
C4orf46	5.71868	6.67828		CCDC174	4.11487	3.79289	3.52899
C4orf48	12.4366	16.71		CCDC18	0.899357	0.90852	0.665482
C5	0.0137215	0.0119046		CCDC180	0.0656096	0.105961	0.101145
C5AR1	0.0053768	0		CCDC183	0.0783187	0.1104	0.063089
C5AR2	0.113688	0.0794994		CCDC183-AS1	0.570708	0.670349	0.520331
C5orf15	3.69061	4.19793		CCDC186	1.43781	1.35491	1.59008
C5orf22	2.50794	2.94812		CCDC189	3.67165	3.81007	3.16718
C5orf24	4.7501	4.90789		CCDC18-AS1	0.921377	0.983855	0.77062
C5orf34	0.853669	0.806269		CCDC191	0.0165718	0.0104084	0.0113317
C5orf34-AS1	0.0288385	0.007228		CCDC194	0.139927	0.188325	0.0637875
C5orf51	4.10172	5.28327		CCDC22	4.75916	4.45745	4.23078
C5orf58	0.0736117	0.0251003		CCDC24	1.13606	1.32957	1.11667
C5orf63	0.203545	0.188331		CCDC25	2.3175	2.37295	2.18679
C5orf66	0.0311626	0.00669796		CCDC26	0.152066	0.138712	0.11768
C6orf120	49.1266	45.1166		CCDC28A	3.17395	2.77754	3.17959
C6orf132	0.0398541	0.034649		CCDC28B	14.1637	14.5711	11.9311
C6orf136	3.61226	5.03129		CCDC30	0.00592436	0.0113401	0.0054014
C6orf163	0.200235	0.186317		CCDC32	1.5164	1.53824	1.43146
C6orf223	0.0293976	0.0331565		CCDC33	0.00286353	0.00616638	0.00348102
C6orf226	1.60849	0		CCDC34	1.10316	0.848417	0.94831
C6orf47	42.824	41.0267		CCDC43	4.81363	4.34371	5.0624
C6orf47-AS1	0.341446	0		CCDC47	12.3629	12.0868	9.65085
C6orf52	0.153281	0.166232		CCDC50	3.54558	3.54487	3.41826
C6orf62	7.07654	6.31058		CCDC51	3.0639	3.18289	2.47058
C6orf89	5.43174	5.1945		CCDC57	0.415021	0.433278	0.348955
C6orf99	0.0160898	0.0276153		CCDC59	0.869333	0.817995	0.760717
C7orf25	0.180396	0.966486		CCDC6	1.57585	1.32565	1.47134
C7orf26	1.32449	1.74732		CCDC61	0.80487	0.664579	0.639281
C7orf31	0.0724417	0.0536186		CCDC62	0.0650424	0.0830006	0.079068
C7orf50	0.89809	0.835757		CCDC66	0.878503	0.95652	0.856686
C7orf61	0.0135292	0.0305182		CCDC68	0.0947383	0.0759111	0.0843669
C8G	1.2506	0.629304		CCDC69	0.907742	1.21373	0.768112
C8orf17	0.174097	0		CCDC7	0.0248505	0.0223497	0.0243257
C8orf33	10.3128	10.6639		CCDC71	4.70783	4.41724	2.78997
C8orf37	0.317789	0.275218		CCDC71L	75.1183	77.8879	61.451
C8orf37-AS1	0.00079503	0.000192147		CCDC74A	3.9999	3.501	3.85322
C8orf44	0.445167	0.317091		CCDC74B	0.574004	0.526771	1.26736
C8orf44-SGK3	0.00126864	0.00510278		CCDC77	0.966534	0.780508	0.754705
C8orf58	1.42174	1.51976		CCDC78	1.40151	1.25751	3.54055
C8orf76	1.16657	1.25471		CCDC8	18.9788	21.2419	12.0873
C8orf82	21.5671	20.587		CCDC80	0.0387403	0.031284	0.0331131
C8orf88	2.38287	2.62797		CCDC81	0.026395	0.0142098	0.00721951
C9orf106	0.00885831	0		CCDC82	1.68714	1.87733	1.76122
C9orf116	0.404888	0.421027		CCDC85A	0.00189456	0.00257651	0.00490434
C9orf129	0.141846	0.0135887		CCDC85B	40.5722	39.5444	27.32
C9orf131	0.0978259	0.0317784		CCDC85C	0.378072	0.381963	0.380426
C9orf135	0.0169448	0.0109208		CCDC86	6.30655	6.29984	7.03829
C9orf139	0.0131347	0		CCDC87	0.397904	0.428427	0.524016
C9orf147	0.030044	0.00576151		CCDC88A	3.36772	3.09718	2.95483
C9orf153	0	0.000986595		CCDC88B	1.52504	1.72134	1.90763
C9orf16	52.5567	64.8175		CCDC88C	0.376456	0.339654	0.4338
C9orf163	0.838872	1.28392		CCDC9	3.10525	2.44359	2.75889
C9orf40	4.0828	2.64011		CCDC90B	3.84765	3.83574	2.83438
C9orf43	0.0263219	0.0158334		CCDC91	0.230151	0.214376	0.213264
C9orf50	0.0322346	0.0227227		CCDC92	0.143777	0.134503	0.146128
C9orf64	2.38938	1.9728		CCDC93	0.702766	0.64937	0.669049
C9orf72	0.201018	0.18402		CCDC96	0.355828	0.127708	0.378489
C9orf78	40.6919	36.6898		CCDC97	1.25929	0.991199	0.783894
C9orf85	0.182591	0.112093		CCDC9B	0.0402532	0.0866819	0.1101
CA1	0.0945142	0.0824066		CCHCR1	5.30936	4.92483	4.67858
CA11	0.932337	1.50424		CCL2	0.257166	0.346116	0.117233
CA12	0.00797803	0.00899815		CCL24	0.0713199	0.153582	0.0278676
CA13	0.155232	0.139575		CCL26	0.150481	0.209281	0.165781
CA14	0.0924419	0.00992972		CCM2	1.19566	1.16238	0.665257
CA2	0	0		CCN1	0.366809	0.179521	0.364833
CA3	0	0.0010281		CCN6	0.0327141	0.0264176	0.0521961
CA3-AS1	0.0184196	0		CCNA2	101.632	100.983	102.464
CA5B	0.059228	0.0722019		CCNB1	52.4245	53.8975	41.3739
CA5BP1	0.305242	0.533173		CCNB1IP1	8.04675	6.90363	7.72368
CA7	0.00353787	0.0319219		CCNB2	16.7746	15.8389	16.0771
CA8	0.852952	0.944612		CCNC	10.1899	10.3788	8.58439
CA9	0.0371219	0.0804991		CCND1	0.412221	0.423198	0.27706
CAAP1	0.543471	0.627874		CCND2	12.2779	11.7949	9.81954
CAB39	1.61606	1.66183		CCND2-AS1	0.00451624	0.0194507	0.0259385
CAB39L	0.0251924	0.0241085		CCND3	2.71686	2.64414	3.15179
CAB39P1	1.34839	0		CCNDBP1	16.368	14.9447	16.6027
CABIN1	0.751418	0.964222		CCNE1	3.65786	3.52564	2.83426
CABLES1	0.00961403	0.000617359		CCNE2	2.49189	2.58548	1.46486
CABLES2	0.44519	0.400025		CCNF	8.66776	9.07149	6.92482
CABP1	0	0		CCNG1	114.189	103.891	124.971
CACFD1	0.151968	0.267812		CCNG2	0.0725835	0.0836268	0.100318
CACNA1A	0.000484671	0.000273322		CCNH	2.03855	1.90546	1.97265
CACNA1B	0.000279196	0.000629792		CCNI	20.2857	19.1115	19.3932
CACNA1E	7.02675e-05	0		CCNJ	1.90681	2.21827	2.04489
CACNA1F	0.00486896	0.00137288		CCNK	0.523757	0.515451	0.512264
CACNA1H	0	0.003396		CCNL1	21.3208	20.9404	32.7437
CACNA1I	0.0280923	0.018292		CCNL2	32.1434	33.7615	31.7242
CACNA2D2	0.00583916	0.000274408		CCNO	0.779506	0.559534	0.521178
CACNA2D4	0.00652712	0.00214717		CCNQ	2.10681	2.23439	1.92084
CACNB1	0.382228	0.535272		CCNT1	13.877	12.5818	12.4974
CACNB2	0.0126478	9.6407e-05		CCNT2	2.99421	2.84599	3.4064
CACNB3	0.257054	0.153941		CCNT2-AS1	0.0202067	0.0247576	0.0184987
CACNB4	0.00090546	0.000875346		CCNY	1.2245	1.1289	0.927313
CACTIN	8.83922	9.26018		CCNY-AS1	0.286337	0.144713	0.127867
CACTIN-AS1	0.489136	0.0697755		CCNYL1	0.253843	0.226852	0.185149
CACUL1	1.10113	1.06841		CCNYL2	0.017105	0.0306952	0.0242591
CACYBP	32.2795	27.657		CCP110	3.42523	3.28852	3.70894
CACYBPP1	0.450115	0		CCPG1	6.83784	5.54686	6.48549
CACYBPP2	0.813188	0.859844		CCR10	1.21869	1.69489	1.56383
CAD	8.17933	11.255		CCR4	0.624035	0.408985	0.272107
CADM1	0	0		CCRL2	1.37929	1.76797	0.758516
CADM2	0.00216248	0.00167245		CCS	3.14568	3.28014	2.70516
CADM4	0.356749	0.186733		CCSAP	12.4508	11.0493	11.3305
CADPS2	0.0010307	0.000273529		CCSER2	0.387884	0.413295	0.360387
CAGE1	0.0185712	0.011089		CCT2	65.2718	66.6908	60.6677
CAHM	3.08815	3.38333		CCT3	21.332	21.7808	20.2097
CALB1	1.16178	1.02781		CCT4	65.3665	63.7376	56.7452
CALB2	0	0		CCT5	104.784	102.801	93.0855
CALCOCO1	1.00891	1.02271		CCT5P1	1.02588	0.934643	3.02183
CALCOCO2	1.01033	1.17564		CCT6A	76.5607	79.7265	66.5653
CALCR	0.00206416	0.000258677		CCT6B	0.0503822	0.0413311	0.0262485
CALHM2	0.69572	0		CCT6P1	0.971255	0.839754	0.836961
CALHM5	0.0157227	0.0502436		CCT6P3	0.604347	0.598909	0.938704
CALM1	15.1429	16.3226		CCT7	55.3509	55.2084	49.9969
CALM2	23.5602	21.2336		CCT8	100.893	97.1108	91.951
CALM2P2	6.97008	0		CCT8P1	4.70046	4.56322	35.7597
CALM3	33.618	38.973		CCZ1	4.56851	3.63922	4.07632
CALML4	0.282473	0.348883		CCZ1B	2.9161	3.04722	2.53803
CALML6	0	0.0177547		CD109	0.0616584	0.0487538	0.0746615
CALN1	0.00996096	0.0101286		CD151	27.5955	26.0899	24.4281
CALR	184.379	219.79		CD163L1	0.0115019	0.0113521	0.0122343
CALU	15.2076	14.2246		CD164	49.2834	47.9885	52.0983
CAMK1	1.086	1.06029		CD164L2	0.399201	0.363697	0.19598
CAMK1D	0	0		CD19	0.449954	0.447202	0.236674
CAMK2B	0.0044017	0.00529549		CD22	0.263536	0.332674	0.207132
CAMK2D	0.000100208	0.000339063		CD226	0.0713444	0.0547191	0.0659378
CAMK2G	1.10661	1.11354		CD24	12.8189	10.6718	10.603
CAMK2N1	0.0721651	0.162785		CD276	0.463937	0.58503	0.56779
CAMK2N2	0.309114	0.0664074		CD2AP	3.64321	3.43705	4.01242
CAMK4	0.00444656	0.000716447		CD2AP-DT	6.57761	5.41578	6.34976
CAMKK1	0.532176	0.612585		CD2BP2	26.0095	27.6712	24.2782
CAMKK2	1.07637	1.24221		CD2BP2-DT	0.230198	0.660949	0.909471
CAMKMT	0.0150205	0.0227144		CD320	9.93684	11.6256	8.7608
CAMKV	0.181696	0.276491		CD33	1.71856	1.52127	1.85794
CAMLG	3.88648	3.27122		CD36	0.0581309	0.0439462	0.0492407
CAMSAP1	1.2328	1.30886		CD37	0.922633	0.589309	1.0037
CAMSAP2	0.190858	0.17099		CD3D	16.6681	14.8798	14.0426
CAMSAP3	0.0307092	0.0363677		CD3G	0.424902	0.559162	0.484244
CAMTA1	0.0250672	0.0241659		CD4	0.0112854	0.0202518	0.0102892
CAMTA1-DT	1.62883	0		CD40	0.308573	0.261048	0.200953
CAMTA2	0.465095	0.60023		CD44	0.0245752	0.0485106	0.0410774
CAMTA2-AS1	1.28868	0.0452444		CD46	16.2734	16.5187	15.0164
CAND1	4.53378	4.7018		CD46P1	0.0314568	0.0112899	0.0764801
CAND2	0.412015	0.429629		CD47	2.15196	2.02106	2.13386
CANT1	3.88975	4.90951		CD52	49.461	52.2372	53.0796
CANX	30.3343	27.3986		CD53	3.27484	2.30126	2.69407
CAP1	14.3831	14.9638		CD55	5.0527	4.11972	5.0918
CAP1P1	3.3946	0		CD58	1.15919	1.00725	0.990946
CAP1P2	1.39401	0		CD59	14.1919	15.7416	13.8813
CAPG	1.5163	1.84642		CD63	89.8585	94.8383	89.2271
CAPN1	6.01302	6.5292		CD68	14.6912	13.083	14.4642
CAPN10	1.24175	1.37907		CD69	9.6794	11.108	6.14152
CAPN10-DT	1.92108	2.10842		CD70	0.0305155	0.0394276	0.0333862
CAPN11	0.0444352	0.015187		CD72	0.038133	0.0410581	0.0221244
CAPN12	0.0769919	0.0831744		CD74	0.0296271	0.0318998	0.0838403
CAPN15	7.75599	9.03592		CD80	0.762729	0.755071	0.870043
CAPN2	3.48034	3.51965		CD81	8.21298	7.88418	7.38927
CAPN3	0.0167614	0.00155099		CD82	0.0844646	0.0737382	0.104066
CAPN5	0.0145531	0		CD83	0.441562	0.454459	0.224974
CAPN7	1.75369	1.54745		CD84	0.292439	0.171748	0.233297
CAPNS1	11.2146	13.4856		CD9	0.0695423	0.0320901	0.0905768
CAPRIN1	11.0847	10.5106		CD93	0.494967	0.631627	0.317564
CAPRIN2	0.313469	0.263665		CD96	0.01198	0.0106877	0.00780176
CAPS	1.38796	0.712474		CD99	0.76422	0.97918	0.699083
CAPS2	0.000599545	0.00270482		CD99L2	0.686218	0.615365	0.485927
CAPZA1	13.2804	11.697		CD99P1	0.0533324	0.0488099	0.0534871
CAPZA1P2	0.64234	0.525256		CDADC1	0.266234	0.280622	0.334716
CAPZA2	1.72665	1.32515		CDAN1	8.39314	7.30648	8.201
CAPZB	0.673397	0.945371		CDC123	4.15368	3.99155	3.32883
CARD10	0.349536	0.471478		CDC14A	0.827534	0.800816	0.652362
CARD11	0.149369	0.169879		CDC14B	0.227466	0.23529	0.225454
CARD14	0.00904929	0		CDC14C	0.0849124	0.164246	0.0151381
CARD16	0	0		CDC16	2.56466	2.42712	2.4798
[truncated: 16,628 more rows]

## Sheet: DND41 H3K79me2 top 5%
Gene IDs	Length
NLGN4X	340185
KMT2E	321075
HIVEP3	315388
CHST11	306498
ARID1B	262190
RNU6-1188P	259474
RUNX1	257182
KLF12	235214
TCF12	234803
AC137932.1	229372
HMGN1P10	222482
CAP2P1	220434
CDK6	219272
GNAQ	216552
MBNL1	210756
RPL37P18	208820
RN7SKP136	206425
LDLRAD4	206256
GALNT2	205118
AC090152.1	201448
MSI2	197769
ETV6	192727
LINC01222	190583
JMJD1C-AS1	185713
BCL2	182701
RNU6-1010P	182474
GPR107	180974
AC092910.2	180637
IGF1R	177039
CUX1	175726
TMEM131L	174253
JMJD1C	173206
PVT1	164328
JARID2	164223
AL139125.2	163574
TRAF3IP2-AS1	161036
EVL	159148
SSBP3	157040
RPL21P8	156522
KANSL1-AS1	156493
CCNY	156355
CTBP2	155806
THOC7	149363
COA1	148293
TBL1XR1	148055
RORB	145836
ZFAND3	145265
ARPP21	144662
AC007431.3	142860
NR3C1	142621
ZEB1	139284
CMIP	136364
CLASP1	136274
ELF1	135368
LRCH1	134870
AL163193.1	133629
PRKCH	133207
GALNT7	133176
CHD2	132869
SSBP2	130262
FAM53B-AS1	130122
ARHGAP15	128507
ARHGAP35	128071
GAB2	127393
ARID2	127359
TASP1	126464
FABP5P3	125959
LEF1-AS1	124908
DIP2B	124739
IKZF2	124611
LZTFL1	124137
PUM1	124000
AKAP2	123639
PPP2R5E	123484
UBASH3B	123225
PPP6R3	123144
ZNF644	122332
HDAC4	121508
SPPL3	120794
AL390754.1	120582
AC010522.1	120295
RPTOR	120022
RALY	119540
RAI1-AS1	118776
CASC15	118328
DYRK1A	118094
HIVEP3	118066
ANKRD28	117837
STK24-AS1	117345
ZNF609	115963
ZNRF1	115330
GATAD2A	114680
AAK1	113574
KDM6A	112392
GBE1	111633
POU2F1	110888
AL024474.2	110549
FTO	110272
TMED5	110012
OGFRP1	109300
NSD2	108970
SSBP2	108956
EPB41L2	108947
ANKRD17	108751
GATAD2B	108592
GNB1	108490
PPP1R12A	108400
RN7SL65P	108032
SEMA4D	107858
LCOR	107790
NCOA2	107351
HDAC4	107306
PDE7A	107046
CAPZB	107004
GGPS1	106834
LARP4B	106299
EPC1	106123
PTEN	106047
TLK1	105928
ARRDC1-AS1	105865
ST8SIA4	105026
PRR11	105014
WIPF1	104428
RFX7	103601
DLG1	103427
BCL11B	102834
BCL11A	101929
PHTF2	101628
NSD1	101518
TNRC6B	100906
Y_RNA	100662
WNK1	100313
BRD4	100234
AC021242.3	100045
PCGF5	99785
NUDT3	99530
GBF1	99502
SLX4IP	98403
NRIP1	98356
FAM193A	98262
ZFAND3	97900
UTRN	97860
FBXW11	97400
STT3B	96992
ASH1L	96948
MFHAS1	96944
ATP11A	96817
AUTS2	96688
FOXP1	96679
CEP85L	96650
AGPAT3	96478
AC009403.2	96373
GSE1	96178
SFMBT1	95275
VAV3	94532
XRCC5	93932
HAUS8	93689
INPP4B	93651
PHF20	93494
VOPP1	93471
ZMIZ1	93001
AC090543.1	92990
STAG2	92959
PHF21B	92684
ABI1	92617
RN7SL503P	92540
AL138724.1	91982
CR391992.1	91934
SNORD42	91883
ZADH2	91766
VGLL4	91675
SPRED2	91392
NIPBL	91294
GNG2	91194
YY1	91175
FABP5P15	91125
AC017002.5	90654
SDHDP2	90299
TCF7L2	90297
MGAT5	90237
SCAI	89906
C18orf25	89752
PUM2	89180
ARIH1	89122
CREBBP	89033
MPRIP-AS1	88672
AC017083.1	88506
ARID1A	88447
APTR	88365
SPEN	88309
SYNE2	88285
SRPK2	88098
PLCB1	88006
PAFAH1B1	87959
PRRC2B	87638
PARP8	87538
AL513211.1	87284
CYTOR	86978
ZNF292	86840
SMURF1	86695
DLEU1	86596
FYN	86044
TNFAIP8	85842
TRIM33	85669
AC073592.3	85563
ITPKB	85379
PACSIN2	85364
PAN3	85342
ABHD12	85023
ANKRD33B	85003
TBCA	84568
AAMDC	84262
ADD3-AS1	84227
AL606517.2	84214
AFF1	84157
MKLN1-AS	84133
RTN4	84132
MAP4K4	84106
UCK2	84039
WAC	84018
UTY	83736
E2F3	83413
AEBP2	83177
RFTN1	83128
RPL23AP11	83087
RPRD2	82811
ERBIN	82800
HMBOX1	82208
ITGA9-AS1	82091
ABHD17B	82086
HIPK3	81983
FOXJ3	81857
KCMF1	81745
TAB2	81733
RNU6-1034P	81347
RPL4P6	81337
HEMK1	81320
SETD5	81298
CHD7	81286
MLLT10	81205
UBE3A	80888
SMARCC1	80527
AL158801.1	80517
MTMR3	80496
INPP5A	80424
PIAS1	80392
CNOT6L	80290
FAM120AOS	80093
RREB1	80069
CTDSPL2	79826
PEX5L	79804
MEF2A	79633
PDS5B	79583
PCNA	79533
BCR	79452
AL049830.4	79279
TNRC6B	78795
RAB10	78655
ASXL1	78530
CDK17	78474
CCDC88C	78424
PLEKHA8P1	78414
MEMO1	78267
MARK3	78241
RAB7A	78184
ELOVL5	77937
PTBP2	77921
SPSB1	77866
CUL3	77745
SEPTIN2	77647
SLC7A1	77537
PELI2	77384
INPP4A	77252
DNAJB6	77128
RFWD2	77087
PPP2R5C	77035
CNOT1	77027
DPYD	76964
CASK	76846
LINC00977	76845
CHAF1A	76812
MED20	76789
PPP2R2A	76776
UBE2G1	76699
hsa-mir-550a-1	76571
PRKCA-AS1	76362
AP002986.1	76322
EML4	76203
BRAF	76188
LRRC8D	76091
CCDC26	76034
KIAA0232	75993
LIN54	75942
RCAN1	75677
KAT6A	75671
SEPTIN7	75650
MRPS6P2	75597
FAM222B	75560
SERINC5	75551
AGO2	75536
AC062017.1	75506
AC091046.2	75415
PUDP	75364
AMBRA1	75354
VKORC1L1	75331
CLSTN1	75288
EIF3H	75227
CNOT6	74832
VRK1	74753
CELF2	74392
LIMD1	74097
AC027682.4	74068
CCM2	74020
AL138785.1	73893
PIGL	73892
CHSY1	73621
RTN3	73617
PSPC1	73420
NFATC3	73389
KDM4B	73154
ELF2	73120
FLI1	73111
PIK3CD	73040
EZH2	73030
UBR5	73014
FAM210A	72465
NCK1	72381
MED13	72286
WASF2	72249
TFDP2	72154
MAP4K3	71994
AL445187.1	71776
AC006249.1	71738
PTPN2	71688
CBFB	71681
USP7	71623
PRKCA	71424
PRR13P1	71105
CELF1	71017
SAE1	70729
POLR1D	70666
SCAF8	70518
GAB2	70376
MGMT	70319
Metazoa_SRP	70207
ATF7IP	70039
PPP4R2	70036
FHIT	69873
MAPK1	69800
FRS2	69792
UBE2D2	69380
DHX15	69329
MOB1B	69251
AUTS2	69211
SLC23A2	69173
RANBP9	69110
SMURF2	69078
FBXO11	69012
AL031733.2	68906
RYBP	68717
E2F3P1	68666
SPAG9	68581
GPATCH8	68556
MDFIC	68538
AL353748.2	68100
THRAP3	67914
BAZ1A	67894
ARID4A	67892
AC124283.4	67830
SEPTIN9	67811
PIP4K2A	67743
AC016727.1	67610
SUMO2P8	67557
CCDC12	67520
C1orf132	67514
PIGW	67374
RBPJ	67321
SAFB	67308
CAMTA1	67242
SLMAP	66985
MECP2	66978
MIR646HG	66977
TET3	66972
ZRANB1	66970
SOS1	66936
RPTOR	66844
NFIC	66815
GRB2	66722
TAOK3	66711
BPTF	66467
MYH9	66384
BBIP1	66313
RNU6-1231P	66242
AL354943.1	66158
PTBP3	66147
AC009299.3	66107
MIR648	66103
YRDCP1	66093
KIF9-AS1	66078
USP12-AS1	65924
CCDC138	65855
MAP2K1	65848
BAZ1B	65811
URI1	65755
ROCK1	65576
VMP1	65454
YDJC	65392
USP15	65269
PXYLP1	65231
AC010331.1	65212
USP10	65192
GPBP1	65144
RRAS2	65073
AL449283.1	65016
PITPNB	64754
MRPS6	64739
PPP6R2	64712
UBE2E1	64676
SH3KBP1	64480
PTPRN2	64420
MSN	64419
RNU4-89P	64330
UBE2K	64169
SLC8A1	64167
PKN2	64142
ABCC1	64124
HNRNPC	63917
AC092757.1	63858
AL021453.1	63730
BARD1	63721
NF1	63679
NT5C2	63668
JADE3	63643
RBM4	63624
HECTD4	63612
ZC3HAV1	63370
CBX3P2	63316
LMNB1	63307
CNOT2	63063
MBD5	62984
MIR576	62979
PIAS2	62963
ZFAND6	62857
RNASEH2B	62827
FOXK1	62825
RAP1A	62809
UHRF2	62674
AL356258.1	62668
RHOH	62472
STIM2	62417
LUZP1	62337
C5orf56	62323
SRSF11	62303
CHD6	62174
ASAP2	62104
XPO1	62099
PPP1R37	61984
CUL1	61983
FAM117B	61978
AL158198.1	61832
SESTD1	61786
GRAMD4	61764
AC026691.1	61700
AC127024.2	61699
SMAD2	61698
KDM2A	61689
RAP1GDS1	61666
PHF3	61630
AC008764.7	61585
ARHGAP21	61554
NFAT5	61478
TBCD	61475
AP002505.1	61196
ATAD2	61081
PSMB7	60989
TTC7A	60964
AL356776.1	60948
ZFX	60941
ARHGEF3	60655
ELOCP33	60602
ASCC3	60534
TDGF1P6	60406
EPC2	60241
N4BP1	60185
SOCS5	60005
ADAMTS17	59774
ARL8B	59732
NUMA1	59590
WDR20	59549
IGF2R	59422
PDZD8	59378
NFYC	59363
FNIP1	59353
YES1	59297
ZMYND8	59234
AC064807.1	59199
MTDH	59171
TMCC1	59148
TRIM24	59041
ACOT7	59002
TAF4	58986
AC013564.1	58954
VAPB	58936
LUC7L2	58865
AGPS	58793
BTF3L4	58790
AC078962.4	58765
MIR3680-2	58709
RAF1	58705
LETM2	58675
DTL	58633
AC011471.3	58542
CHCHD3	58537
B4GALT5	58496
CAMSAP1	58487
SDCCAG8	58473
NUCB2	58443
PHF2	58378
PHF14	58321
FYN	58270
NSRP1	58245
AC135507.2	58231
BCAT1	58162
FAM172A	58079
UBE2D3	58079
ANAPC10	58075
LARP1	58022
RBMS1	58009
AL031281.2	57986
NDUFC1	57876
PLCB1	57714
MARK2	57647
SLC20A2	57596
ACTN1-AS1	57593
FRYL	57537
RBM6	57477
ELOVL6	57470
YWHAE	57428
RNF24	57375
NUP93	57178
DNM2	57162
MAP1LC3B	57141
NCK1	57138
TRAF3	57137
SEPTIN6	57119
DENND4C	57076
DNMT1	57068
MFSD14C	56956
DENND1B	56835
ZZZ3	56771
LMBR1	56769
RNF144A	56734
MOB2	56715
R3HCC1L	56472
RABEP1	56426
AIG1P1	56226
DARS	56195
GPX1	56186
DUSP13	56175
LYRM4	56125
WAPL	55994
MGAT4A	55920
CCDC6	55901
TOP1	55893
SPOP	55683
AKAP8L	55565
SMAD4	55511
AC110769.2	55479
AC004980.1	55459
BBX	55373
GSEC	55347
PLCB1-IT1	55339
SNRK	55203
XRRA1	55192
AC098591.1	55177
ATP2B1	55031
ANGPT2	54992
RPRD1B	54857
CHD9	54772
AGFG1	54644
SNORA25	54639
HUWE1	54520
AL356020.1	54484
AC108688.1	54448
GPBP1L1	54424
AC009961.1	54420
DIS3L2	54378
TMEM131	54321
POLK	54320
SP3	54293
TFDP1	54274
FAF1	54257
ARHGAP5	54215
NEIL3	54177
LSM5	54041
Vault	53997
MYH10	53983
RAPGEF1	53951
OSBPL3	53945
STAU1	53922
CLIC4	53845
AL159972.1	53793
ACTN4	53705
PTK7	53659
YLPM1	53647
RPL7P45	53635
PMM2	53625
APC	53597
RNF144A-AS1	53591
TNRC6A	53574
RPS29	53566
AC064847.1	53562
ATP6V0E1	53537
CMAHP	53415
AGPAT5	53371
EVA1A	53369
LRRC8C-DT	53357
Y_RNA	53340
AC022079.1	53301
FXR1	53270
C6orf106	53237
HNRNPA1P50	53208
UTP18	53200
RANBP3	53146
PTPN9	53109
ZNF382	53035
ETS1	52941
TMEM123	52872
FUBP1	52869
AC008875.1	52866
HS6ST1	52841
AL136301.1	52834
UBE2W	52765
AHDC1	52580
PRPF40A	52573
DIAPH3	52557
Z98885.3	52511
snoU13	52407
XPO7	52403
KRIT1	52387
MIRLET7BHG	52367
ATP8B1	52362
KLF13	52328
ELL	52319
GNA13	52225
MIR646	52195
TNPO3	52188
RHEB	52168
SNORA19	52064
MIR4505	52052
CEP85L	51987
SEPTIN9	51986
MARCHF5	51942
PHC3	51899
ATP2A2	51871
NCK2	51866
ZBTB8OS	51785
ZNF680	51684
ACAP2	51649
GABPB1	51647
PTPN1	51620
JPX	51611
PRKCA	51611
SKI	51592
AC096861.1	51590
AL139156.3	51581
REV1	51512
ATF2	51441
HIRA	51377
NUMB	51364
FOXP1	51346
UHRF1	51341
ST7L	51290
SETD2	51265
CENPC	51241
Y_RNA	51202
UBE2E3	51200
RBPMSLP	51048
KCTD9	51047
CUX1	50953
MAP4K4	50852
QRICH1	50848
POM121	50817
MIR626	50805
TTC28	50779
NRF1	50765
DOT1L	50592
NECTIN3	50589
CDK8	50574
RNU6-268P	50568
CLINT1	50499
IP6K1	50433
SF3B3	50417
PARD3	50344
TAS2R30	50221
QKI	50155
MTPN	50151
UBAP2	50110
USP32	50068
CDC42P1	50041
GRAP2	50002
KATNBL1	49956
RNU4-49P	49943
PPARGC1B	49920
DAP3	49865
SNX3	49819
ERH	49780
SIK3	49769
KPNA6	49689
STAM	49571
ATG4B	49552
CD38	49511
ANKRD44	49509
CHEK1	49500
MLXIP	49493
MIR3140	49430
DSCR3	49352
CAPRIN1	49130
NRBF2P5	49090
BCL2L1	49063
AC096558.1	49021
EGLN1	48987
AC104763.2	48910
FAM72A	48874
BACH1	48861
LRRFIP1	48840
RSBN1	48808
ACSL4	48775
KAT6B	48765
SNORD56B	48754
PAG1	48700
TRPM7	48566
MSL1	48549
NALT1	48533
FDFT1	48522
AP001347.1	48455
PPM1B	48414
BICD1	48387
AC090114.3	48385
ATXN2	48331
RALBP1	48331
MED15	48326
ZNF592	48320
ADAMTS17	48300
KDM6A	48297
SRGAP2C	48281
SRGAP2B	48276
CD99	48249
FAM72C	48245
IRF2	48217
MLLT10	48140
SIPA1L1	48119
PPTC7	48087
TTC28	47969
MPZL1	47954
KHDRBS1	47934
MAPK14	47910
HDAC1	47897
ZNF506	47886
UBE2O	47831
ZNF131	47813
EIF4E	47793
ZMYND11	47791
C12orf65	47783
HHIP-AS1	47757
AL133343.1	47738
RAD23B	47722
UGP2	47702
NPEPPS	47660
BBX	47642
AC021237.1	47628
TRIP12	47546
DTX1	47510
TACC3	47499
KLHDC4	47450
JADE1	47429
ZCCHC11	47412
DDX42	47332
TNRC6C	47330
AC007448.2	47278
DOCK11	47253
SMYD4	47245
FAM126B	47244
CDKN2A	47220
LPIN2	47200
COX10	47186
ADIPOR2	47172
GLG1	47070
RAD21	47028
USPL1	46997
FAM49B	46990
RMND5A	46975
AC026124.2	46957
AC008026.1	46944
YTHDF3	46881
ATP2B4	46848
IKZF1	46826
RASA1	46799
CBFA2T2	46733
B3GNTL1	46671
EP300	46670
AL392103.1	46667
TAF8	46651
PTPN4	46619
RPL19P14	46588
RIF1	46556
CDC42SE2	46550
FUT8	46544
AXIN1	46484
SNX5	46484
ARIH2	46423
STIM1	46422
MAP4K5	46374
PJA2	46326
SLC7A6	46319
AL354726.1	46288
ATL2	46239
SLC16A1-AS1	46230
MAP3K2	46227
RNF138P1	46207
TOX	46204
DPYSL2	46167
C21orf58	46033
SMG7	45981
PHF5A	45949
AC023051.2	45899
AC018463.1	45892
ARID1B	45876
KIF2A	45864
FAM168B	45833
PRDM2	45758
ZNF124	45753
HHLA3	45746
FRYL	45696
YWHAQ	45671
PICALM	45660
SPECC1L	45634
NCOA2	45627
TSHR	45625
ATG5	45619
RNA5SP104	45546
CSNK1A1	45537
TTC39C	45530
RNF4	45492
OSBPL8	45490
CSE1L	45486
LRP8	45411
TGFBR2	45382
TPX2	45372
CYFIP2	45348
RAP1B	45310
SCAP	45261
PPP4R3B	45240
GID8	45229
INTS6	45225
ANKHD1	45145
UBR3	45131
AC068620.4	45103
BCL2L11	45098
CD247	45098
Y_RNA	45029
RRM2	44953
SAMSN1	44931
ATM	44903
C2CD3	44883
AP003031.2	44827
UBQLN1	44827
SH2B3	44821
EMB	44817
KLHDC3	44815
DHX29	44723
PDCD6	44719
LYPLA1	44686
PRPF4B	44653
ZRANB3	44613
DLG5-AS1	44605
HNRNPR	44599
TRPC4AP	44555
WASL	44553
CIT	44526
RAG2	44522
Y_RNA	44520
AC005183.1	44458
HNRNPM	44442
CTSC	44392
ITPR2	44365
USP9X	44349
ITFG1	44319
PARGP1	44298
ZMYM2	44292
B3GALT2	44291
AUTS2	44250
AC096558.2	44228
MAP3K4	44189
SPATS2	44174
FOXP1	44164
SLC25A40	44086
USP47	44072
ABI2	44056
RPL21P122	44015
SELENOF	43976
LSM1	43871
AL591846.1	43785
PAK4	43683
NCAPD3	43647
USP22	43645
XPO6	43638
TTC28	43634
AC025164.2	43617
CSNK2A1	43598
STX18	43596
VDAC1P4	43596
SERP1	43575
HSF1	43556
SNX13	43536
CASTOR2	43529
NR2C2	43527
Y_RNA	43495
HS3ST3B1	43466
MAN1A1	43465
KMT2A	43459
CMTM7	43406
RFC1	43375
SNTB2	43364
HIVEP3	43300
CCSER2	43277
RAD54B	43263
ABCB7	43240
RFWD3	43237
APBB1IP	43227
AL121952.1	43200
NCOA6	43166
MIR3680-1	43155
KIAA1143	43097
FOXP1	43067
SLIRP	43063
C8orf44-SGK3	43048
CLIP1-AS1	43035
STK26	43014
NBPF26	43007
RNU6-597P	42983
AKT2	42977
SON	42966
NDUFS4	42935
SARNP	42919
TMED10	42908
REPS1	42898
RNF38	42872
DUTP1	42852
RNU2-18P	42815
ZNF654	42802
RNU6-613P	42799
XPO4	42764
MICU1	42756
AC090587.1	42746
ITPK1	42734
RAPGEF5	42721
PPP2R2D	42716
MELK	42667
EEF1A1P25	42661
RN7SKP9	42603
ZFY	42580
NBPF19	42568
MSI2	42564
RAB8B	42563
PAPD5	42556
NDUFA5P2	42547
PRRC2C	42454
RB1CC1	42452
GOLGA4	42445
PRKCB	42434
MAPK8	42412
BTBD10	42411
ACSS1	42391
G3BP1	42388
ANP32A	42384
KLHL15	42349
MATR3	42335
HERC1	42334
ADD1	42319
PTPRC	42248
NMRK1	42240
FTH1P25	42235
ZNF526	42166
DTL	42157
XRCC6	42138
TOGARAM1	42116
BTBD7	42087
HBS1L	42042
FRMD4B	42022
SRP72P2	42012
MIR103A2	42006
CCDC69	41998
GNPTAB	41995
PPP2R3C	41991
ZNF341-AS1	41974
RNF216	41970
FOXP1	41946
LATS1	41927
SMG1	41917
RNA5SP437	41808
RNF19A	41806
KLC1	41769
RALA	41762
RBM25	41749
UBE2V2	41740
NPTN	41711
AUTS2	41702
MIR941-4	41695
RBM39	41692
BICD2	41534
CMC2	41531
MARCHF6	41513
AL353754.1	41510
PIP4K2A	41494
DICER1	41466
ZFR	41402
MIR181A2HG	41394
UBR2	41378
TBC1D15	41350
ZNF431	41325
SENP7	41279
IFI16	41275
HMG20A	41270
BUB1	41255
SLC25A33	41231
MTERF3	41217
HNRNPUL1	41168
RN7SKP230	41140
UBA2	41129
DOCK5	41078
ZDHHC17	41049
FAF2	41041
SPTBN1	41040
PAXIP1	41009
ARHGAP25	40997
IQGAP1	40985
MYCBP2	40982
HAT1	40963
ERVFRD-1	40944
PELI2	40928
SH3KBP1	40914
SLC4A7	40912
SH3KBP1	40890
TNFAIP8	40848
EPC2	40815
AL132777.1	40794
RAB1A	40792
PIK3R1	40779
PRKACB	40757
NUFIP2	40752
G2E3	40737
NCAPG	40734
TRG-AS1	40728
GTF2I	40699
AKAP10	40697
DOCK2	40680
ZNF236	40669
POLR2B	40663
RASA3-IT1	40659
MIER1	40648
NDFIP2	40632
PTP4A2	40624
POLE	40621
CCDC88A	40594
ABL1	40576
NT5C3A	40575
DDX6	40574
Metazoa_SRP	40563
DMTF1	40561
RNF13	40560
STK35	40484
SNORA79	40474
SINHCAF	40473
XRN2	40408
NBPF14	40360
CLTC	40345
MDM4	40279
DEK	40276
CDC42SE2	40259
RAP1GDS1	40235
NDST3	40226
EIF4G3	40201
CCNK	40185
LPP	40174
DAG1	40137
AATF	40118
ADA	40100
ZNF461	40072
SZRD1	40042
ZBTB1	40015
FAM208B	39976
USP14	39969
MYBL2	39947
ZBTB40	39915
ELP4	39912
DCK	39881
PAPD7	39869
VAPA	39854
GAB3	39827
ADNP	39820
FAM208A	39816
PRR4	39794
TRAM2	39786
NOTCH2	39744
RTL10	39732
BUB1B	39726
USP24	39690
CREB1	39664
RABGEF1	39660
CTHRC1P1	39659
PI4KA	39642
TRAF3IP2	39622
SMG1P5	39621
MBNL3	39607
SMC4	39605
TFDP2	39594
AC069503.1	39550
KAT6B	39544
ILF3	39532
VEZT	39499
HK2	39486
CTNNBL1	39467
FRMD6	39444
PUDP	39434
UBE2N	39425
TUBGCP3	39412
ETF1	39374
KDM3A	39371
TASP1	39364
IGF1R	39362
BRF1	39332
UBA6	39326
PDHX	39322
EMSY	39307
RN7SL419P	39298
PGAM1P11	39291
P2RY8	39289
ELF2	39215
SLA	39215
SCAF11	39182
DRAM2	39119
AP002770.1	39108
RAB3GAP1	39104
POLR3C	39101
CYSLTR2	39071
RNF34	39069
RNF170	39064
CRKL	39054
INTS13	39031
C1orf43	39018
BLK	39012
AC087190.4	38997
PPP4R3A	38995
AP003108.2	38992
METAP1	38962
AC032044.1	38921
PXT1	38913
SLTM	38910
ATG13	38909
AL158850.2	38870
ARNTL	38860
AL365295.1	38856
AL391335.1	38841
XRCC4	38807
GATS	38797
RUFY3	38788
DPP4	38734
ERLIN1	38733
QSER1	38727
RPRD1A	38704
GIGYF2	38607
WTAP	38595
CTBP1	38584
AC114760.2	38561
RIC1	38548
LZTS1-AS1	38521
MIR6839	38520
BZW2	38501
AL359232.1	38499
YME1L1	38498
PFKP	38497
ETV6	38444
CKAP5	38443
AC006001.2	38439
CUL5	38438
TACC1	38409
CHD9	38406
SVIL	38399
SRSF9	38389
GAPVD1	38385
AC104451.1	38368
REPIN1	38368
CDKN2C	38361
EIF5B	38346
CRCP	38332
ARHGAP17	38317
PSMB2	38303
BTRC	38297
STRN	38291
KIAA1551	38282
MKL2	38270
ANKRD54	38236
LINC01934	38221
EIF3E	38175
WIPF2	38173
ZEB2	38170
MAML1	38165
OGT	38152
CRTC3-AS1	38149
MCM4	38129
MTMR12	38129
AC091132.3	38123
TMEM161B-AS1	38098
MTAP	38071
LDLRAD4	38070
SLC39A8	38067
HSPA4	38049
KTN1	38039
MAP4	38038
ZNF100	38005
MICU2	37988
CEP57L1	37930
RTF1	37923
SCAF4	37916
NAP1L4	37914
LINC02486	37912
KATNAL1	37910
SYNCRIP	37875
TMPO	37868
SS18	37856
AC010978.1	37854
AC068205.4	37850
AC244153.1	37837
RBMS2P1	37821
DHX9	37790
ESF1	37787
USP31	37787
RPL11P4	37770
DGCR2	37766
DUTP6	37762
YTHDF2	37733
AL035071.1	37732
ZNF345	37718
MYB	37705
IDE	37701
CPB2-AS1	37698
XPNPEP3	37674
TBC1D1	37669
AP000365.1	37653
NINL	37620
CNST	37584
ITK	37557
CAPZA2	37523
RAC1	37500
DNAJC2	37497
UIMC1	37418
ZBED4	37406
ACTR2	37393
FNBP1L	37392
TAF5L	37378
GLYR1	37374
ZNF654	37364
RLF	37348
CD44	37341
BRWD1	37327
SSH2	37323
KDM1A	37311
PIKFYVE	37277
ZNF430	37271
SLC7A5	37263
IL1RAP	37229
PPM1D	37210
OSBPL5	37202
KDM4C	37172
MAN2A1	37146
AC005154.1	37129
DESI2	37128
PEX14	37118
PPP3CC	37118
GLCCI1	37081
EEF1A1P32	37061
AP1G1	37045
IPO7	37004
PPP4R1L	36999
NDE1	36993
ARMC8	36941
CMPK1	36901
MACF1	36862
YBX1	36839
MTMR2	36816
CSNK1G2	36808
AL157756.1	36807
TMEM245	36807
TCF3	36768
UBE3C	36766
USP13	36754
ZNF83	36744
CARM1	36700
IPO11	36699
ZNF407	36643
MTA3	36641
ALMS1	36628
ESYT2	36623
PIEZO1	36604
NAA50	36590
DCAF7	36558
HNRNPA1	36554
ADAR	36537
CEP44	36501
AC084018.2	36409
R3HDM2	36396
TFCP2	36366
SRPK1	36336
ZDHHC20	36323
BORA	36322
RN7SL449P	36316
GON4L	36300
PPP4R1	36298
CUX1	36294
TAF15	36279
NCAPG2	36249
TSNAXIP1	36217
NUP50-AS1	36207
ERCC6L	36170
TSC22D2	36167
U2AF2	36167
VPS26A	36156
UBAP1	36154
TMEM175	36153
NF2	36146
PEAK1	36137
AC016575.1	36123
AC006001.3	36122
ZNF91	36122
NDUFB6	36120
ZNF721	36114
MIR3975	36111
TCEA1	36111
AURKA	36101
MCM6	36092
CEP350	36064
SIAH1	36052
SLC3A2	36047
C1GALT1	36033
DHRS3	35959
ZNF664	35959
BID	35951
USP49	35950
LPP	35927
CAND1	35911
FNBP4	35910
METTL16	35889
H2AFZP1	35868
KNOP1P2	35845
YWHAG	35841
RBM6	35839
MOB4	35828
ARHGEF6	35805
SMARCA4	35802
PTPRA	35786
MBP	35765
THOC2	35754
NSFP1	35732
ATIC	35718
MAPKAP1	35696
HNRNPK	35648
USP15	35628
ELAVL1	35626
RICTOR	35553
ARHGEF3	35513
CERS6	35487
POGZ	35472
SKP1	35472
FGFR1OP	35467
LCORL	35466
RECQL5	35454
VAV3	35432
REXO1	35424
ZNF451	35399
PIP5K1A	35386
ARHGAP12	35376
GMPS	35366
AL928654.2	35328
GTF2IRD1	35312
FTO	35304
TET3	35282
TMX2	35276
AL162430.2	35275
OXSR1	35267
CUL2	35244
AC000123.3	35227
RBM26	35211
ACACA	35210
ETNK1	35202
SF3B1	35199
BRF1	35191
C12orf75	35172
AP3S1	35165
ACSL3	35163
KDM2B	35158
DNAJB1	35149
MCM5	35134
NSF	35123
TBC1D14	35107
CHCHD3	35089
ZFP91-CNTF	35073
RSRC1	35062
NGLY1	35049
NBDY	35046
ZDHHC2	35030
SFI1	35024
AC006557.3	35020
AC103760.1	35020
RPN1	35016
RBM15-AS1	34985
MKL1	34959
CTNNB1	34948
TM9SF3	34947
CSDE1	34943
SLC25A25	34939
CCT6P3	34923
RB1	34895
DIAPH1	34880
AC090970.1	34876
SNORA37	34858
BCOR	34857
CLTA	34823
ARFGEF1	34819
NFE2L2	34806
CBL	34796
AC007391.1	34773
RCL1	34770
PPP6C	34760
WDHD1	34747
ARAP2	34717
ANKRD13D	34711
CPNE1	34697
CENPF	34690
SND1	34687
BIRC6-AS1	34682
ZSWIM7	34681
USP42	34651
RPL12P11	34645
HACD3	34614
NDST3	34589
ZBTB10	34581
MED27	34541
RNF138	34506
CXXC5-AS1	34491
SUGP2	34483
LINC02062	34432
SNORD92	34427
RUFY3	34422
PPP1CB	34403
ERP44	34397
SENP6	34375
PRKCQ-AS1	34371
GNAI3	34365
MFSD14A	34363
CYB5B	34334
AC099811.6	34328
NIP7	34305
CDK13	34304
Y_RNA	34289
ATF1	34211
TMEM217	34163
ZC3H11A	34161
RSRC2	34129
AP2A2	34112
GNA15	34111
NOP58	34098
TOPBP1	34082
CD82	34038
ITSN2	34001
CCNT2	33979
HSD17B12	33954
CDC42SE2	33952
EXOC5	33929
LINC00476	33926
JADE2	33903
SIN3A	33850
RRAGD	33837
GTF2B	33794
EYA3	33786
PBRM1	33781
ZNF561-AS1	33774
RPS6KA3	33768
TXLNG	33761
PELI2	33757
ITGA4	33755
CD247	33751
FBXO5	33750
KCNRG	33745
EWSR1	33742
AL512631.2	33703
ZNF675	33703
LDLR	33689
PFDN1	33677
RNF145	33673
EPS15L1	33647
CYCSP10	33595
EZR-AS1	33573
ANAPC13	33566
ACYP2	33563
RALGAPA1	33509
PANK1	33496
HECTD1	33492
HNRNPDL	33483
PPP3CA	33465
GTSE1-AS1	33451
CD47	33435
AL133268.3	33424
SRFBP1	33407
SCD5	33393
NUSAP1	33392
DCP2	33379
ZNF638	33373
KPNA4	33355
FRYL	33344
TMEM11	33338
UTP4	33328
AL121845.3	33313
PLEKHA2	33285
USP3	33271
ATP5J2	33236
USP48	33227
TASP1	33207
GTF2F2	33194
PSKH1	33183
C17orf80	33173
SUCLG2	33171
APPBP2	33093
MROH8	33076
PARN	33059
TAPT1	33057
ZNF136	33049
TCERG1	33044
SMPD3	33042
AFF1	33036
RAB11FIP1	33028
YEATS4	33026
GSKIP	33009
MND1	33003
PAXBP1	32973
CSTF3-AS1	32969
PAPOLA	32958
LARP4	32944
UXS1	32916
TTTY15	32899
SART3	32894
ARID3A	32874
RBM10	32874
NIN	32864
RPS6KB1	32863
NDC80	32840
TM7SF3	32816
XRCC3	32812
RBMS1	32767
FLNB	32760
EP400	32741
HIF1A	32731
PANK3	32714
KF455155.1	32707
DIP2A	32696
MLLT3	32679
CLOCK	32676
RPL17P3	32661
TCF7L2	32659
AC087276.1	32656
DYNC1LI1	32649
LPCAT1	32641
DDX55	32636
EDEM1	32621
USP37	32601
PIP5K1C	32591
NSMCE1	32590
EEFSEC	32587
AC007383.2	32572
PACSIN2	32545
CSNK1D	32513
RERE	32509
TBC1D10A	32492
PPP2CA	32476
ATP2A3	32474
TGFBRAP1	32472
AL121992.2	32467
BTBD3	32456
AL136172.1	32434
CCDC138	32412
AC015795.1	32410
AC016065.1	32406
ATP6V0E1P1	32395
AC009630.1	32389
TP73	32388
MORF4L1	32361
SLF1	32356
ANXA11	32354
GOLPH3	32352
UHRF1BP1	32345
PPP5C	32310
PRR14L	32286
FLJ20021	32281
AC068014.1	32218
IGFBP2	32211
TMEM94	32210
SNORA72	32200
HERC1	32183
MBOAT2	32178
AC091057.1	32175
ORC3	32155
TSC22D1	32151
NCOA1	32140
MGEA5	32136
NASP	32127
SMYD2	32125
SFXN1	32117
ZNF280D	32114
RERE	32078
SHQ1	32053
RABL3	32044
SPSB4	32041
EIF3H	32040
CENPU	32027
TASP1	32021
RN7SL288P	32016
SRSF4	31982
MAP4	31980
UBE2V1	31972
ASF1B	31968
PELO	31928
AC239799.1	31913
MMS22L	31911
RC3H1-IT1	31894
CNTLN	31860
EXOSC7	31800
TRIT1	31783
DEPDC1B	31747
HNRNPU	31743
FNDC3A	31724
PTPN11	31708
USP39	31689
RAPGEF6	31669
JARID2	31663
AC022778.1	31589
TATDN2	31584
CCNE2	31583
MZT2A	31580
AC137767.1	31579
TXLNGY	31566
ABCD3	31550
SMIM7	31531
SMG1P1	31520
TTBK2	31503
MIEF1	31502
SSH2	31487
AC211429.1	31460
CDC27	31445
DNAJB14	31430
PSAP	31428
TPP2	31411
NUDT2	31385
ANKRD28	31342
FLNB	31340
RNF121	31338
AHCTF1	31332
SENP5	31323
CDC5L	31306
AL359092.1	31292
RAB2A	31277
C1orf35	31267
IGHV3-35	31258
SEH1L	31238
NAA25	31237
CASK	31232
STRBP	31214
ZNF507	31214
PIGN	31209
LINC00676	31208
DGCR8	31192
GALK2	31171
UBXN7-AS1	31168
RAPGEF1	31114
SGTA	31108
MAEA	31077
AC096536.1	31074
PCNT	31072
TBC1D5	31066
LSM12	31048
CACUL1	31047
NEDD1	31037
YWHAZ	31034
GNB4	31025
PRPF8	31022
ARF4	30991
AZIN1-AS1	30940
PIPOX	30935
ZBTB17	30918
AC087481.1	30910
COPS7B	30899
VDAC1	30890
RYK	30879
CDK12	30877
PRKCH	30867
RAB5A	30866
TSHZ3	30862
BNIP3P10	30855
XPOT	30817
AP3D1	30812
FGD3	30809
PIGX	30801
MTFR1	30799
CBX1	30789
DMGDH	30774
RASA2	30770
CMIP	30767
PARG	30766
ZNF207	30762
ASB3	30761
FAM162A	30747
UBP1	30744
ZEB1	30742
SLC39A10	30740
FADS1	30737
CHD8	30721
RAB18	30700
HIC2	30689
NCK2	30687
SSU72	30683
HP1BP3	30679
ZC3H18	30671
UPF2	30660
SLC2A1	30658
SH3KBP1	30655
ESF1	30648
NDC1	30639
SP100	30638
CLASP2	30636
MKI67	30594
UBE2D3	30582
BCLAF1	30578
MBP	30569
ATXN10	30551
NUP210	30550
QKI	30543
MZT2B	30538
ORMDL1	30536
UQCC1	30531
MAPRE2	30528
POT1-AS1	30524
ZNF93	30509
PAPD4	30507
PAIP2	30503
PCBP2	30498
STX6	30497
AC106886.5	30495
ARHGEF18	30475
AC021739.1	30466
WDSUB1	30437
AFF2-IT1	30435
PCNX1	30422
LUC7L	30417
MDH1	30367
XRRA1	30349
IREB2	30338
BTAF1	30326
WDR1	30326
RASSF5	30318
AC010654.1	30287
POLR1A	30283
OGDH	30260
CORO1C	30259
ZFYVE9	30252
ZNF565	30230
ZSCAN30	30209
AC092167.1	30181
SORT1	30165
RNF168	30163
AC010864.1	30157
SRRM2	30143
AL133477.1	30133
CENPK	30127
PRR12	30126
DCAF13	30095
RAPGEF6	30090
SUMO1	30090
NIPA1	30077
DNAJC7	30072
NAP1L1	30069
PCID2	30065
KANSL1	30052
CISD1	30032
MAX	30027
ARHGAP11A	30017
AL357552.1	30009
AC103876.1	30007
ARGLU1	30006
ANKFY1	30002
PIK3R3	29991
ARMT1	29975
PHF21A	29948
C4orf33	29945
ZNF546	29928
MSH2	29904
SRD5A1	29900
C16orf52	29863
TMEM248	29837
ZFYVE1	29836
PCM1	29816
TBC1D22A	29802
SGSM3	29801
SOAT1	29801
SEC11A	29797
NUP35	29787
PGAP2	29787
ATP5A1	29784
MINOS1-NBL1	29783
ME2	29755
BANP	29747
TTC33	29741
TNPO1	29735
CTDP1	29716
ARHGAP26	29713
PANX1	29698
U4	29665
NOL4L	29657
HNRNPD	29654
CRYZL1	29648
IMMT	29642
CCNI	29639
SUV39H2	29633
AL023653.1	29606
IRF1	29606
SH3BP5	29605
TIA1	29560
COX16	29548
XRCC2	29534
ANLN	29532
AGO3	29525
ERGIC1	29509
DDX24	29506
AP002360.1	29491
CCNT1	29486
STIM1	29486
APOLD1	29484
TTLL4	29476
IKZF1	29460
MAU2	29446
SLC30A9	29420
PDCD10	29417
SZRD1	29391
GRHPR	29369
TOP2B	29350
KLHL8	29348
SMS	29346
CLPTM1L	29343
REST	29338
EIF4EBP1	29334
RPLP0	29327
G3BP2	29293
MRM2	29284
MTIF3	29282
TRA2A	29226
MIR548AC	29224
NCOA3	29216
TRAT1	29169
ZNF678	29169
PCF11	29161
AC069431.1	29156
AC011447.3	29150
CRAMP1	29104
GNA12	29103
UNK	29084
VAV1	29060
DMXL1	29055
ZNF724	29054
METTL15	29051
XIAP	29042
CFL1P1	29041
ZNF670	29034
CDC25A	29029
DCAKD	29016
FXYD6-FXYD2	28993
DGUOK	28992
TP53BP2	28988
PSMA6	28983
USP44	28970
UBE2G2	28956
CD48	28955
ATP1B3	28953
DAZAP1	28948
LINC01547	28938
AL445933.1	28929
IST1	28923
CPT1A	28902
RNF38	28899
N4BP2L2	28895
DCLRE1A	28873
FAM96A	28873
MAPKAPK5-AS1	28847
BMPR1B	28844
TMEM165	28841
RCC2	28819
IWS1	28808
C4orf36	28782
ATP6V0D1	28781
FKBP1A	28769
DIS3	28764
STOML1	28741
PSMD11	28715
ANKLE2	28705
ZNF217	28705
FNDC3A	28657
CANX	28643
PRKCQ	28640
TBP	28638
GTPBP4	28633
NET1	28629
UCHL5	28624
UBXN4	28623
ZNF736	28621
DLEU7	28615
WDR76	28605
IGF2R	28604
KLHL26	28575
PI4KAP2	28568
TOP2A	28568
AC005261.2	28553
PI4KAP1	28551
EPDR1	28549
CDK8	28515
KLHL18	28515
AC025682.1	28506
AL023803.1	28495
HK1	28494
FAM35A	28492
FCHSD2	28489
TFG	28487
HDAC2	28459
SCO1	28454
METTL9	28451
PTPN23	28451
PQLC1	28431
EIF4ENIF1	28428
LMBRD2	28402
MANEA-AS1	28383
SLC1A4	28376
KANSL2	28375
CEP76	28372
PPP3CA	28371
AARS	28369
DOCK10	28368
MCMBP	28346
SIPA1L1	28342
C16orf87	28341
CDYL	28330
AC068152.1	28327
EIF2A	28326
GUCD1	28322
KLHL6	28311
CGGBP1	28303
PIK3R5	28300
CDK5RAP2	28290
DCP1A	28269
LUC7L3	28252
ACACA	28219
LNP1	28213
TMEM68	28213
ANKRD12	28203
SAE1	28189
PDAP1	28188
UPF1	28183
LRCH3	28170
PRKCB	28170
DOCK10	28169
AP3B1	28167
VIPR2	28162
CASP8AP2	28124
FIP1L1	28119
PREP	28097
FBXO25	28090
OTUD4	28089
ZNF267	28088
DCAF1	28085
MDC1	28072
ZNF7	28072
PRR4	28065
UFD1	28059
TBC1D22A	28055
ASCC1	28028
AK3P5	28027
IGHV3-42	28025
AL353691.1	28013
GINS1	28000
CCNB2	27999
LRRC8D	27998
ZBTB7A	27984
HMGXB4	27969
PAG1	27924
[truncated: 37 more rows]

## Sheet: DND41 RNA seq
gene_name	DND41 S1	DND41 S2	DND41 S3		gene_name	DND41 S1	DND41 S2	DND41 S3
7SK	29600.5	32036.4	36356.7		5_8S_rRNA	2.60345	2.26442	8.63319
A1BG	2.95649	2.09778	0.932026		7SK	187045	185454	189410
A1BG-AS1	2.1737	3.24043	1.7169		7SK	27.7442	22.4465	23.8242
A2M	0	0	0		A1BG	1.23325	1.23956	1.36598
A4GALT	0	0	0		A1BG-AS1	1.45303	1.37626	0.957589
AAAS	12.4116	12.6497	10.4295		AAAS	4.23747	3.46276	2.55573
AACS	0.913504	1.00762	0.739024		AACS	0.552238	0.508787	0.524746
AAGAB	6.62006	5.95788	4.91339		AAGAB	3.08264	2.66343	1.92257
AAK1	6.01621	5.4572	4.71287		AAK1	4.47821	3.924	3.22685
AAMDC	0.0132943	0.0672101	0.0455022		AAMDC	0.0523878	0.0726203	0.0800032
AAMP	31.4374	32.7959	29.096		AAMP	11.8774	12.3464	12.1344
AAR2	6.39711	5.76622	4.32814		AAR2	2.37704	2.32245	1.40287
AARS1	16.6683	15.923	14.3213		AARD	0.53271	0.330956	0.265639
AARS2	9.29429	11.4113	6.96822		AARS1	10.6094	10.0323	8.46216
AARSD1	4.44461	4.59623	4.16329		AARS2	4.01846	3.7786	3.41295
AARSD1P1	2.57235	2.69421	4.97739		AARSD1	2.51996	3.06556	2.90557
AASDH	1.73488	1.43965	1.50698		AARSD1P1	2.34011	2.18471	1.11915
AASDHPPT	25.9897	23.8255	17.7528		AASDH	0.88046	0.698232	0.593197
AATBC	0	0	0		AASDHPPT	11.2399	9.22819	7.08811
AATF	4.49475	4.63559	4.87165		AATBC	0.444536	0.325597	0.347089
AATK	0	0	0		AATF	2.68635	2.97841	2.97535
ABALON	4.07941	12.0305	3.49064		ABALON	17.3082	15.9328	9.83411
ABAT	0.305876	0.237903	0.312062		ABAT	0.359104	0.270915	0.223769
ABCA1	0	0	0		ABCA11P	0.177809	0.109743	0.166507
ABCA10	0	0	0		ABCA12	0.00615519	0.00602284	0.00402849
ABCA11P	0.068302	0.315832	0.367757		ABCA17P	0.112833	0.145626	0.13499
ABCA17P	0	0.0498089	0		ABCA2	0.492193	0.587836	0.397458
ABCA2	0.894823	0.703707	0.714629		ABCA3	0.071233	0.0640932	0.0750223
ABCA3	0.0797862	0.0336137	0.0341354		ABCA5	0.111428	0.105273	0.0989142
ABCA5	0.187212	0.118308	0.213589		ABCA7	0.660349	0.742327	0.516452
ABCA6	0	0	0		ABCB10	2.17827	1.82903	1.45552
ABCA7	0.455297	0.383631	0.735883		ABCB6	0.430064	0.281526	0.346729
ABCB10	5.55922	4.70906	4.41521		ABCB7	1.8634	1.62467	1.21825
ABCB10P4	1.9711	2.01557	1.01384		ABCB8	1.46572	1.36263	0.940769
ABCB11	0	0	0		ABCB9	0.0577696	0.0344436	0.0390913
ABCB4	0	0	0		ABCC1	0.559429	0.508297	0.454106
ABCB6	0.140232	0	0.0080034		ABCC10	1.11232	1.08164	0.934489
ABCB7	3.46464	3.62074	2.89126		ABCC11	0.00607573	0.0192027	0.00530766
ABCB8	3.54187	2.25235	2.17294		ABCC2	0.100215	0.0475445	0.0377637
ABCB9	0.149211	0.143685	0.218873		ABCC5	0.965681	0.876693	0.619966
ABCC1	2.04622	1.63428	1.46573		ABCC8	0.0849544	0.0837434	0.0807251
ABCC10	1.6831	1.46544	1.15214		ABCD1	0.112092	0.146243	0.174673
ABCC13	0	0	0		ABCD2	0.0159854	0.0278074	0.00398561
ABCC2	0.073982	0.077921	0.0633044		ABCD3	3.64178	3.40106	2.4334
ABCC4	0	0	0		ABCD4	3.05015	3.01398	2.20515
ABCC5	1.505	1.16799	1.03927		ABCE1	14.9267	13.4215	10.2735
ABCC6	0	0	0		ABCF1	7.72347	8.06652	7.10648
ABCC8	2.02363	1.52426	1.5348		ABCF2	5.68718	5.32911	4.91129
ABCD1	0.260071	0.109567	0.222535		ABCF2-H2BE1	5.11711	5.4875	4.13344
ABCD2	0.241076	0.125002	0.190414		ABCF2P1	0.42727	0.297245	0.372362
ABCD3	11.0705	9.71926	8.98693		ABCF3	6.95951	5.84508	4.9421
ABCD4	7.63786	5.70011	5.16616		ABCG1	0.115959	0.102279	0.0655606
ABCE1	57.1883	49.8142	42.5747		ABCG8	0.00624252	0.0108592	0.0190663
ABCF1	16.6078	14.6278	13.3093		ABHD1	0.612463	0.374867	0.732414
ABCF2	15.5193	13.6562	11.0734		ABHD10	18.4641	15.3744	10.9903
ABCF2-H2BE1	14.2184	14.3287	12.1277		ABHD11	2.88748	3.21467	2.11659
ABCF3	13.1167	12.1436	10.6693		ABHD12	1.55859	1.41187	1.11268
ABCG1	0.411143	0.569927	0.261015		ABHD13	13.6294	11.4611	9.07811
ABHD1	0	0	0		ABHD14A	0.938352	0.551027	0.633114
ABHD10	34.6013	32.5714	25.3667		ABHD14A-ACY1	0.225911	0.342821	0.0283264
ABHD11	14.5377	11.4591	8.42675		ABHD14B	2.66245	2.62283	2.65015
ABHD12	2.67943	2.55264	2.24663		ABHD15	3.41196	2.28279	2.45452
ABHD13	20.8949	17.9498	20.5332		ABHD16A	3.04052	2.14607	1.92428
ABHD14A	3.76363	2.19819	3.05633		ABHD17A	6.12906	6.99648	5.90442
ABHD14A-ACY1	0.122005	0.464221	0.263813		ABHD17AP1	2.24454	3.05374	1.21349
ABHD14B	5.47065	4.97537	3.64084		ABHD17AP3	1.96323	0.704085	0.433491
ABHD15	10.5645	13.2684	12.451		ABHD17AP4	0.724362	0.193781	0.13602
ABHD16A	5.12745	4.32034	3.64493		ABHD17B	3.07274	3.0877	2.21644
ABHD17A	18.597	16.9111	15.6377		ABHD17C	0.0818287	0.0474484	0.0238026
ABHD17AP1	4.17913	4.46558	2.43542		ABHD18	1.33985	1.21484	0.920325
ABHD17AP3	1.59405	1.31301	2.02165		ABHD2	2.00068	1.6311	1.21829
ABHD17AP4	9.34341	7.68368	5.31865		ABHD3	1.22426	1.15485	0.972866
ABHD17AP6	0	0	0.0387347		ABHD5	1.60181	1.38382	1.07427
ABHD17B	7.59185	6.32975	5.95101		ABHD6	0.104099	0.128666	0.076498
ABHD17C	0.153345	0.143564	0.0583167		ABHD8	0.0530244	0.00793293	0.102434
ABHD18	1.50795	1.44584	1.15683		ABI1	1.56559	1.4113	1.05241
ABHD2	4.72961	4.55445	3.65193		ABI2	2.64362	2.3495	1.8895
ABHD3	2.37735	1.82103	1.60273		ABI3	1.41681	1.4409	1.00399
ABHD4	0.259133	0.0727814	0.221733		ABI3BP	0.0293415	0.0289233	0.0312948
ABHD5	3.71226	2.88163	2.62622		ABITRAM	1.87162	1.58549	1.10585
ABHD6	0.0667371	0.112464	0.095175		ABL1	0.889433	0.802168	0.534952
ABHD8	0	0	0		ABL2	0.765152	0.695278	0.533313
ABI1	2.73473	2.26618	2.14664		ABLIM1	0.0562708	0.043185	0.0305356
ABI2	8.09141	7.04592	6.58063		ABLIM2	0.0148197	0.0179026	0.0150878
ABI3	5.45206	6.55051	4.75156		ABR	0.321373	0.274916	0.225029
ABITRAM	5.85776	5.9362	5.08006		ABRACL	10.2222	10.1476	9.97099
ABL1	1.75566	1.77891	1.62904		ABRAXAS1	1.90777	1.59845	1.34893
ABL2	1.41936	1.46357	1.3504		ABRAXAS2	5.15269	4.29478	3.27561
ABLIM1	0.115197	0.13589	0.157714		ABT1	19.0591	17.2359	12.0425
ABR	0.646297	0.549385	0.415988		ABTB1	4.40593	3.62409	2.76618
ABRACL	32.7063	30.254	27.4535		ABTB2	0.00384813	0.00334701	0.00402967
ABRAXAS1	2.02563	1.94435	2.11374		ACAA1	1.07759	1.09935	1.08502
ABRAXAS2	11.4724	10.1358	8.35522		ACACA	0.594064	0.493453	0.410841
ABT1	46.807	39.1514	36.2509		ACAD10	0.40811	0.452482	0.324828
ABTB1	3.39977	4.09231	3.32467		ACAD11	0.179106	0.139613	0.151409
ABTB2	0	0	0		ACAD8	5.87718	5.06679	4.24756
ACAA1	4.39957	4.50598	3.95931		ACAD9	2.63428	2.43723	2.00094
ACAA2	0	0	0		ACADM	4.11415	3.92176	3.34574
ACACA	1.52764	1.25331	1.23836		ACADS	0.749925	0.681472	0.439536
ACACB	0	0	0		ACADSB	1.56061	1.07635	0.981219
ACAD10	0.819413	0.736461	0.747892		ACADVL	22.1521	21.2248	14.2592
ACAD11	0.265544	0.257861	0.230921		ACAP1	4.36991	3.91209	3.71108
ACAD8	6.83299	6.46604	5.57695		ACAP2	3.03988	2.56908	1.99265
ACAD9	6.20588	5.76912	4.43763		ACAP2-IT1	0.94699	1.09822	0.757523
ACADM	7.7453	7.33759	6.96056		ACAP3	1.50481	1.491	1.25968
ACADS	2.18142	2.68049	2.411		ACAT1	1.24157	1.08769	0.876863
ACADSB	3.69957	3.78048	3.07582		ACAT2	22.5586	21.82	18.9029
ACADVL	79.6145	76.991	69.7556		ACBD3	3.60988	4.18663	4.04595
ACAP1	22.5033	21.2948	17.7743		ACBD4	1.19684	1.1726	1.05642
ACAP2	5.12005	4.24935	3.51277		ACBD5	1.58824	1.32322	1.10539
ACAP2-IT1	0	0	2.19339		ACBD6	0.341182	0.341298	0.349297
ACAP3	2.47951	1.83598	1.54302		ACBD7	6.68371	6.16754	4.22283
ACAT1	4.22787	3.35075	3.2953		ACD	4.34013	3.69105	3.3245
ACAT2	46.3932	48.4159	43.3945		ACE	0.0448399	0.0585009	0.00652157
ACBD3	5.50602	5.33913	4.89559		ACER2	0.380711	0.32816	0.194989
ACBD4	2.12254	1.22367	2.00737		ACER3	0.520417	0.478535	0.368675
ACBD5	3.07435	2.6923	2.33506		ACIN1	15.8973	16.9734	16.1526
ACBD6	0.610041	0.542054	0.635886		ACKR3	0.196867	0.190256	0.0668094
ACBD7	9.72676	6.88439	6.15896		ACKR4	0.0269716	1.22262e-19	0.0897114
ACCS	0	0	0		ACLY	9.37033	8.82363	6.73308
ACD	13.3145	5.27938	11.0577		ACMSD	0.00761719	0.0134523	0.0198533
ACE	0.546186	0.306808	0.155785		ACO1	0.999125	0.892715	0.695528
ACER2	0.803137	0.751909	0.992653		ACO2	1.69826	1.65464	1.35237
ACER3	0.826499	0.709543	0.527073		ACOT1	0.218471	0.180095	0.214216
ACIN1	17.2859	14.8297	16.8528		ACOT12	0	0.0172731	0.0151639
ACKR3	0.710518	0.898017	0.60797		ACOT13	4.99669	4.48221	4.79915
ACLY	29.7303	28.2032	25.1609		ACOT2	1.60295	1.79891	1.03339
ACO1	3.57728	2.99867	2.82431		ACOT7	1.38865	1.14124	0.8882
ACO2	5.79855	5.04645	3.72464		ACOT8	1.31936	1.58524	1.30262
ACOT1	0.78187	1.34817	1.16721		ACOT9	0.0243547	0.0211831	0.0233784
ACOT11	0	0	0.0114211		ACOX1	4.26337	3.8259	2.436
ACOT13	5.03511	4.90187	4.5704		ACOX3	0.31891	0.249456	0.186776
ACOT2	7.07829	3.49494	4.12945		ACOXL	0.00656913	0.0107131	0.00609082
ACOT4	0	0	0		ACOXL-AS1	0.00882085	0.0230165	0.046185
ACOT7	3.81664	3.57788	2.66735		ACP1	17.7198	16.3232	13.0449
ACOT8	2.06225	2.64121	1.97636		ACP2	2.40524	2.36311	2.00933
ACOT9	0.0395547	0.0166643	0.0338458		ACP6	0.327448	0.227167	0.265337
ACOX1	9.44519	7.03238	5.46636		ACRBP	0.136195	0.177689	0.163419
ACOX2	0	0	0		ACRV1	0.255529	0.281521	0.28245
ACOX3	0.538802	0.644374	0.461037		ACSBG1	0.0548134	0.0838503	0.0662924
ACOXL	0.00666811	0.00561851	0.00570571		ACSBG2	0.0249097	0.0503082	0.0387536
ACP1	29.3642	27.6474	27.5526		ACSF2	0.536688	0.463952	0.465484
ACP2	5.11884	3.29158	3.45793		ACSF3	0.789905	0.686699	0.688405
ACP3	0	0	0		ACSL1	0.0447408	0.035023	0.039043
ACP5	0	0	0		ACSL3	3.48168	3.1161	2.21938
ACP6	0.284899	0.613472	0.704254		ACSL4	2.16898	1.86495	1.5463
ACRBP	0.138247	0.116486	0.236588		ACSL5	1.3171	1.23893	0.954851
ACSBG1	0.082705	0.139373	0.084922		ACSL6	0.120258	0.100146	0.107175
ACSF2	0.983252	0.918047	0.522996		ACSM3	0.00365028	0.00486867	0.00336626
ACSF3	1.43483	1.41047	1.25697		ACSS1	5.7267	5.55632	4.42548
ACSL1	0	0.0306131	0.0155441		ACSS2	0.0570905	0.0595871	0.0398559
ACSL3	8.48677	7.15089	6.70634		ACTA2	0.0525921	0.035961	0.0276232
ACSL4	5.09671	4.83375	4.82764		ACTA2-AS1	0.877401	0.844863	0.90409
ACSL5	2.02671	1.70769	1.46897		ACTB	356.29	329.181	231.067
ACSL6	0.851889	0.962897	0.906727		ACTBP11	2.14023	2.11079	1.24699
ACSM3	0.0276259	0.00581936	0.0118194		ACTBP15	0.300625	0.784428	0.524679
ACSS1	9.6148	8.63869	7.47156		ACTBP2	229.135	232.433	188.336
ACSS2	0.301344	0.273442	0.277686		ACTBP4	1.34017	0.777097	0.519775
ACSS3	0	0	0		ACTG1	306.553	297.1	235.544
ACTA1	1.23147	0.58309	0.888349		ACTG1P10	1.93628	2.297	1.95175
ACTA2	0.137972	0.116254	0.0196764		ACTG1P14	6.5451	6.93286	3.48012
ACTA2-AS1	1.99503	1.16377	1.57578		ACTG1P17	0.0366784	0.042536	0.0533457
ACTB	1157.92	1136.94	1010.64		ACTG1P20	2.72361	5.03397	3.86222
ACTBP11	14.9412	11.6192	6.88772		ACTG1P25	0.106315	0.0616469	0.0721589
ACTBP15	58.5896	63.766	32.3779		ACTG1P3	1.43026	1.11961	0.998491
ACTBP2	20.7455	25.2541	18.7516		ACTG1P9	0.179839	0.417125	0.0523124
ACTBP9	5.88676	0.992023	7.05168		ACTL6A	13.6833	12.9656	10.6502
ACTG1	694.212	683.969	623.492		ACTN1	1.44034	1.35681	1.18158
ACTG1P14	0	0.971687	0		ACTN4	3.81144	3.87145	3.31945
ACTG1P17	0.0992828	0.0836551	0		ACTR10	2.14192	1.82402	1.73228
ACTG1P20	5.53222	2.32947	14.1938		ACTR1A	6.29517	5.3926	4.0102
ACTG1P24	0	1.24309	0		ACTR1B	5.99505	5.50499	4.16811
ACTG1P25	0	0	0		ACTR2	34.8292	31.4463	23.0829
ACTG1P3	2.3229	0	1.98764		ACTR3	25.0695	21.279	16.0253
ACTL10	0.817343	0	0		ACTR3B	0.189875	0.119439	0.103267
ACTL6A	44.6121	40.4519	34.7466		ACTR3C	0.0375965	0.0146013	0.02849
ACTL8	0	0	0		ACTR3P2	3.80265	1.98447	1.10612
ACTN1	9.33533	8.24956	7.34087		ACTR5	2.07267	2.05618	1.81449
ACTN2	0	0	0		ACTR6	1.61404	1.70861	1.34017
ACTN4	7.01211	7.58295	6.89757		ACTR8	3.70684	3.49969	3.01359
ACTR10	3.23855	2.54482	2.17954		ACVR1	0.07962	0.0672729	0.0635248
ACTR1A	10.3934	10.2259	11.1981		ACVR1B	0.779452	0.790938	0.545375
ACTR1B	16.4405	14.1217	15.1603		ACVR2A	0.0576011	0.0329917	0.0488112
ACTR2	84.3717	78.4432	71.6145		ACVR2B	6.36869	5.58876	4.17973
ACTR3	51.3375	49.3437	43.7903		ACVR2B-AS1	0.335964	0.584427	0.476415
ACTR3B	0.365304	0.364773	0.289421		ACY1	0.242827	0.125894	0.250281
ACTR3C	0.178328	0.0273562	0.0277502		ACYP1	2.63803	2.16655	1.76292
ACTR5	3.87172	3.08105	3.03685		ACYP2	0.0357904	0.0228911	0.0309264
ACTR6	2.72428	2.57602	2.69371		ADA	23.9881	22.2206	17.835
ACTR8	5.91741	5.92535	4.18277		ADA2	0.74806	0.769263	0.533787
ACTRT3	0.48991	0.412795	1.25761		ADAL	1.81346	1.85565	1.55342
ACVR1	0.0923653	0.140088	0.071131		ADAM10	3.60254	3.1886	2.42353
ACVR1B	1.85325	1.27325	1.65896		ADAM17	2.74478	2.39843	2.10758
ACVR2A	0	0	0		ADAM19	0.167073	0.139934	0.13191
ACVR2B	13.9758	13.1091	10.4921		ADAM21	0.112761	0.115163	0.102705
ACVR2B-AS1	0.682052	0.287347	0.583613		ADAM22	0.569742	0.530097	0.445967
ACVRL1	0	0	0		ADAM29	0.00429137	0.00466566	0.000936213
ACY1	1.59106	1.32643	1.43023		ADAM32	0.00626836	0.00311547	0.00468863
ACY3	1.266	0.533362	0.947872		ADAM8	0.132326	0.076729	0.096228
ACYP1	1.67237	1.47623	1.49914		ADAM9	0.552642	0.526575	0.512963
ACYP2	0.0541583	0.0293358	0.026481		ADAMTS1	0.165024	0.0430603	0.0288016
ADA	55.1766	53.5903	51.6127		ADAMTS10	0.433646	0.395352	0.360183
ADA2	1.17259	1.24874	0.794319		ADAMTS13	0.0176858	0.0215357	0.0185201
ADAL	4.71024	3.78634	3.98409		ADAMTS17	0.570561	0.547121	0.4858
ADAM10	8.53551	7.24614	6.19637		ADAMTS6	0.145376	0.100656	0.0859654
ADAM11	0	0.0476921	0		ADAMTSL1	0.000475905	0.000551907	0.000415297
ADAM12	0	0	0		ADAMTSL3	0.00330429	0.0021555	0.00108131
ADAM15	0	0	0		ADAMTSL4	0.0639729	0.0852215	0.0841676
ADAM17	4.75855	5.03187	4.54221		ADAMTSL4-AS1	0.945242	0.788168	0.944128
ADAM19	0.200996	0.211697	0.196556		ADAP2	0.00902231	0.013079	0.0078733
ADAM20P1	0	0.0360573	0		ADAR	17.5398	15.8571	11.3498
ADAM21	0.149333	0.251655	0.306673		ADARB1	0.370397	0.364815	0.315942
ADAM22	0.731787	0.74641	0.762114		ADARB2	0.0267347	0.0286954	0.0176216
ADAM28	0	0	0		ADARB2-AS1	0.210005	0.228322	0.123701
ADAM32	0	0.0183815	0		ADAT1	4.65943	4.18373	3.34015
ADAM8	0	0	0		ADAT2	0.949215	1.09417	0.838311
ADAM9	1.78558	1.57473	1.62973		ADAT3	0.217746	0.172173	0.190014
ADAMDEC1	0	0	0		ADCK1	0.0968462	0.105807	0.083482
ADAMTS1	0.536035	0.338744	0.114667		ADCK2	1.02689	1.05163	0.917385
ADAMTS10	0.042427	0	0		ADCK5	0.158208	0.282091	0.241604
ADAMTS13	0	0	0		ADCY1	0.0139035	0.00930226	0.0111996
ADAMTS14	0	0.0363656	0		ADCY10	0.0030398	0	0.0106107
ADAMTS17	0.139661	0.155923	0.107554		ADCY10P1	0.188306	0.188015	0.118862
ADAMTS2	0	0	0		ADCY3	0.87337	0.907373	0.619438
ADAMTS5	0	0	0		ADCY5	0.0019105	0.000830854	0.00916957
ADAMTS6	0.205816	0.166875	0.149528		ADCY7	0.134871	0.110143	0.0753225
ADAMTS9	0	0	0		ADD1	8.34889	7.73599	6.13177
ADAMTSL4	0	0	0		ADD3	1.69498	1.53496	1.26755
ADAMTSL5	0	0	0		ADGRA2	0.200918	0.206739	0.22594
ADAP1	0	0	0		ADGRA3	0.104178	0.0874403	0.0878167
ADAP2	0	0.0205778	0		ADGRB2	0.350067	0.359506	0.20611
ADAR	33.4364	31.6803	29.3755		ADGRE2	0.561162	0.457842	0.398244
ADARB1	1.07604	1.19936	0.927984		ADGRE5	0.508121	0.432849	0.299454
ADARB2	0.0092383	0.00973016	0.0158099		ADGRF3	0.109528	0.116895	0.0513044
ADAT1	9.69178	8.45494	7.2459		ADGRG1	0.159537	0.14633	0.126563
ADAT2	3.94694	3.28654	3.57595		ADGRG2	0.00597502	0.0114332	0.0104282
ADAT3	0.821076	7.5862e-23	0.137547		ADGRL1	1.42469	1.26632	0.962613
ADCK1	0.421994	0.242434	0.279023		ADGRL1-AS1	0.360084	0.376876	0.348849
ADCK2	4.60565	4.20797	3.79848		ADH5	23.778	20.9067	15.7416
ADCK5	0.256946	0.378877	0.494689		ADH5P4	6.25417	7.53069	4.73778
ADCY10P1	0.12999	0.109529	0.0278072		ADHFE1	0.0517872	0.0494719	0.0229086
ADCY3	2.11228	1.83373	1.69788		ADI1	10.9955	11.6921	9.66515
ADCY4	0	0	0		ADIPOR1	9.66031	9.19865	7.7719
ADCY7	2.30021	2.42269	1.73758		ADIPOR2	1.95939	1.79283	1.28065
ADCY9	0	0	0		ADK	0.213218	0.174852	0.143827
ADD1	14.8241	13.9193	12.2481		ADM5	0.330761	0.917545	0.372384
ADD2	0	0	0		ADNP	22.1445	20.1407	15.509
ADD3	1.93337	1.96582	1.62252		ADNP2	3.40633	3.19455	2.16217
ADGRA2	0.916478	0.682425	0.838916		ADNP-AS1	0.179971	0.156535	0.107973
ADGRA3	0.543886	0.427161	0.381996		ADO	24.0691	23.8465	15.9748
ADGRB1	0	0	0		ADORA2A	0.899596	1.06141	0.498276
ADGRB2	0.136999	0.0865759	0.117226		ADORA2A-AS1	0.0445856	0.036794	0.0369276
ADGRD1	0	0	0		ADPGK	2.31233	2.18643	1.65871
ADGRE1	0.0244613	0.0412218	0		ADPGK-AS1	0.119673	0.0888621	0.10671
ADGRE2	3.22279	3.1995	2.67903		ADPRHL1	0.00886568	0.00257038	0.0257887
ADGRE4P	0	0	0		ADPRM	4.01608	3.36408	2.56873
ADGRE5	2.75044	2.29832	1.65837		ADPRS	5.97373	5.60817	4.52342
ADGRF3	0.066961	0.225684	0.0859449		ADRB1	0.524288	0.228006	0.320263
ADGRF5P1	0	0	0		ADRM1	37.1595	36.026	28.594
ADGRG1	0.18844	0.317557	0.161243		ADSL	8.31292	7.96746	7.89493
ADGRG3	0	0	0		ADSS1	0.0620851	0.0660001	0.0421388
ADGRG5	0	0	0		ADSS2	5.23273	4.67927	3.26976
ADGRL1	1.35042	1.31233	0.966085		AEBP1	25.0894	26.2437	25.4593
ADGRL1-AS1	0.303348	0.479248	0.259566		AEBP2	1.11265	1.09638	1.08903
ADH5	57.1353	54.426	50.6366		AEN	2.72224	2.51968	2.12148
ADH5P4	13.8468	12.9103	23.6915		AFAP1L1	0.0133185	0.00579204	0.0213076
ADI1	8.23032	7.96766	6.64288		AFDN	0.0439192	0.0467948	0.0354515
ADIPOR1	13.0501	10.0745	13.4124		AFF1	2.25419	2.06019	1.73633
ADIPOR2	4.14908	3.56133	3.74933		AFF2	1.04353	0.969159	0.780216
ADIRF-AS1	0	0	0		AFF2-IT1	3.67687	1.33252	5.34769
ADK	0.361229	0.405826	0.326926		AFF3	0.263086	0.25881	0.228402
ADM	6.67795	5.1579	5.71414		AFF4	4.86442	4.34561	3.86361
ADM2	0	0	0		AFG1L	0.101727	0.0950561	0.0623804
ADM5	0.676702	1.71055	4.63228		AFG3L1P	0.748817	0.730959	0.728671
ADNP	47.2854	42.5853	38.6638		AFG3L2	6.31319	6.36646	5.56919
ADNP2	19.1396	16.0415	14.9016		AFG3L2P1	0.542764	0.630413	0.236821
ADNP-AS1	0.0913416	0.153928	0.0781584		AFMID	0.883218	0.679825	0.49109
ADO	60.5634	53.9297	50.0557		AFTPH	3.21904	2.99147	2.1736
ADORA2A	1.90557	1.20954	1.3106		AGA	7.1169	5.76238	3.3854
ADORA2B	0	0	0		AGAP1	0.118856	0.104382	0.0827662
ADORA2BP1	0	0	0		AGAP10P	0.0985856	0.0151337	8.0145e-11
ADORA3	0	0	0		AGAP12P	0.072927	0.0706089	0.210366
ADPGK	6.44062	4.6065	5.1586		AGAP14P	0.0851903	0.0261957	0.036039
ADPGK-AS1	0.0842078	0.070953	0		AGAP2	2.3533	2.71505	2.11617
ADPRH	0	0	0		AGAP3	0.22565	0.139514	0.132857
ADPRHL1	0	0.0606617	0		AGAP4	0.873691	0.701609	0.615848
ADPRM	3.33539	3.59104	3.09183		AGAP5	0.307125	0.31259	0.202345
ADPRS	19.25	19.6801	14.2754		AGAP6	1.14825	1.16831	0.933168
ADRA2C	0	0	0		AGAP7P	0.265567	0.342414	0.0230745
ADRB1	2.98025	1.0762	2.91442		AGAP9	0.600581	0.557809	0.412279
ADRB2	0	0	0		AGBL2	0.0799525	0.109278	0.0797376
ADRM1	83.1354	81.8048	73.5896		AGBL3	0.0325657	0.0154499	0.0258349
ADSL	15.7422	15.534	15.4563		AGBL4	0.000427418	0.000557637	0.000372986
ADSS1	0.168055	0.0944012	0.0958665		AGBL5	3.69536	3.86245	2.58138
ADSS2	17.2549	13.9837	13.3081		AGER	2.18457	2.60229	1.90636
ADTRP	0	0	0		AGFG1	3.0966	2.63267	2.13401
AEBP1	22.4126	18.0312	18.5277		AGFG2	0.614966	0.45847	0.431235
AEBP2	2.20165	2.04783	1.72311		AGGF1	6.10281	5.68543	4.90187
AEN	10.9939	7.96852	8.69912		AGGF1P1	0.307991	0.725652	0.191629
AFAP1-AS1	0	0	0		AGGF1P2	7.20097	7.38396	7.39485
AFDN	0	0	0		AGGF1P3	6.61617	5.69252	4.68891
AFF1	4.02528	3.42342	3.26163		AGK	0.917683	0.920594	0.669576
AFF2	0.677916	0.660595	0.551291		AGL	3.16874	2.38548	1.9045
AFF3	0.205974	0.212306	0.179668		AGMAT	0.0357967	0.0415134	0.0312379
AFF4	6.09977	5.79442	5.77145		AGO1	4.28992	4.21965	3.03837
AFG1L	0.17303	0.164606	0.186265		AGO2	5.67764	4.83509	3.96131
AFG3L1P	1.09367	0.958379	0.636359		AGO3	1.52264	1.2569	1.04636
AFG3L2	15.7028	12.4406	12.8862		AGO4	4.6801	4.15678	3.36483
AFMID	2.09454	1.55092	1.35776		AGPAT1	9.61027	8.56942	8.942
AFTPH	5.3486	4.64952	3.7709		AGPAT2	0.990601	0.813197	0.475931
AGA	10.3162	8.87931	8.16288		AGPAT3	1.79552	1.49487	1.14531
AGAP1	0.170415	0.191454	0.168387		AGPAT4	0.110574	0.0855951	0.0897374
AGAP10P	0.0582979	4.9292e-26	1.2819e-41		AGPAT5	7.52017	6.79774	4.90013
AGAP11	0.000481505	0	0		AGPS	2.86385	2.70328	2.29538
AGAP12P	0.0282403	0.0680164	1.23959e-39		AGRN	0.163761	0.107789	0.0888335
AGAP14P	2.75199e-05	0.0537662	0.0604948		AGT	0.0847015	0.0610035	0.106822
AGAP2	9.56482	9.71851	7.10113		AGTPBP1	1.43121	1.17322	0.800141
AGAP3	0.397389	0.465052	0.358925		AHCTF1	9.80402	9.42666	7.93419
AGAP4	5.2883e-25	1.22676e-05	0.194045		AHCTF1P1	11.5309	10.1014	9.26705
AGAP5	7.98153e-05	0.110333	8.10042e-05		AHCY	5.43033	4.92071	4.09947
AGAP6	0.568612	0.440126	0.663722		AHCYL1	8.11428	7.81476	5.53268
AGAP7P	0.0209954	0.177469	0.202562		AHCYL2	0.0874074	0.090502	0.0806366
AGAP9	0.363773	0.196732	0.121003		AHCYP5	0.514801	1.1194	0.22462
AGBL1	0	0	0		AHDC1	1.25162	1.14572	1.00532
AGBL2	0.185502	0.156303	0.119047		AHI1	0.232525	0.204807	0.200743
AGBL3	0.0160273	0.0202568	0.0205712		AHRR	0.0297243	0.0387706	0.0154727
AGBL5	9.43183	7.71571	8.30561		AHSA1	14.5145	14.9415	13.445
AGER	0	0	0		AHSA2P	7.24731	7.48418	7.69406
AGFG1	6.98743	5.39797	4.94725		AIDA	4.70223	4.13887	2.90103
AGFG2	1.51599	0.901669	1.03012		AIDAP1	4.16851	3.41407	4.57619
AGGF1	11.9799	10.8368	10.7657		AIDAP2	0.42756	0.257637	0.181743
AGGF1P2	9.21548	8.3602	4.20556		AIF1	57.7298	56.8917	50.378
AGGF1P3	11.6794	6.05473	10.0398		AIFM1	2.68683	2.73372	2.33116
AGK	1.77961	2.06573	1.43758		AIFM2	0.0872116	0.107793	0.0470262
AGL	6.25296	5.93469	5.12504		AIFM3	0.0490159	0.0255797	0.0171094
AGMAT	0	0	0		AIG1	0.153332	0.118546	0.089699
AGO1	11.0795	9.83822	8.78764		AIMP1	8.31649	7.88498	7.7595
AGO2	11.3836	10.8568	10.2392		AIMP2	2.73358	2.67683	2.08057
AGO3	2.27227	2.46053	1.78034		AIP	4.0143	4.06442	3.01906
AGO4	5.81099	6.12038	4.59494		AIRN	1.42065	0.887129	1.27151
AGPAT1	12.5655	10.0362	9.07195		AJM1	1.41644	0.8845	0.919115
AGPAT2	1.7173	1.21852	1.16009		AJUBA	1.61082	1.77873	1.56458
AGPAT3	4.1976	3.93778	3.42891		AK2	4.13326	3.69932	2.81589
AGPAT4	0.0269375	0.0226974	0.0460993		AK3	1.99605	1.95367	1.49363
AGPAT5	21.3186	20.2522	17.9276		AK3P3	2.87948	1.87837	1.67518
AGPS	5.18941	5.55483	4.75806		AK4	0.0173415	0.0201079	0.0138577
AGRN	0.25159	0.0605679	0.15377		AK4P1	3.03309	1.3869	0.676051
AGT	0	0	0		AK5	0.00171972	0.00199436	0.00250118
AGTPBP1	2.70696	2.35894	2.29362		AK6	2.89219	2.99137	2.48231
AGTRAP	0.0691198	0.17472	0.118288		AK9	0.132533	0.0880273	0.103038
AHCTF1	14.5739	13.9206	12.1992		AKAP1	2.10068	2.39284	1.85617
AHCTF1P1	50.1033	47.2123	49.8102		AKAP10	2.57367	2.54361	2.07503
AHCY	36.0646	33.7736	26.5412		AKAP11	10.5119	9.37077	7.35869
AHCYL1	23.4354	18.8794	16.6729		AKAP12	0.0443359	0.0292138	0.0234482
AHCYL2	0.315283	0.292221	0.291361		AKAP13	1.03322	0.998358	0.868309
AHDC1	2.13201	1.65704	1.52549		AKAP17A	7.42875	8.2512	8.66054
AHI1	0.270771	0.28899	0.211097		AKAP1-DT	0.0844234	0.0314697	0.0420982
AHNAK	0.0527268	0.0799691	0.0270701		AKAP3	0.0332494	0.0454449	0.04145
AHNAK2	0	0	0		AKAP5	4.24647	3.67808	3.05718
AHR	0	0	0		AKAP6	0.0225652	0.0155377	0.0109397
AHRR	0.125642	0.0965905	0.0816166		AKAP7	0.298068	0.24147	0.211177
AHSA1	39.1401	36.2677	38.071		AKAP8	5.00795	5.17608	5.20221
AHSA2P	6.7574	5.61466	5.05935		AKAP8L	3.6026	4.01924	3.88704
AIDA	13.5713	13.5485	10.9669		AKAP9	4.07444	4.14768	3.97552
AIDAP1	10.8488	8.55577	4.48989		AKIP1	3.54425	3.40801	3.13951
AIDAP2	0.468326	0.641974	0.634879		AKIRIN1	7.71652	6.43981	5.20083
AIF1	308.949	271.19	271.717		AKIRIN2	3.07324	2.82997	2.48376
AIFM1	6.8124	8.06786	6.93054		AKNA	5.77298	5.71116	4.94547
AIFM2	0.260918	0.188441	0.0956828		AKR1A1	2.94861	2.86301	2.38065
AIFM3	0	0	0		AKR1B1	2.6541	2.71778	1.65905
AIG1	0.322814	0.205944	0.157842		AKR1C3	0.0198247	0.0114954	0.00576666
AIMP1	17.4737	16.652	15.4088		AKR1C7P	0.083871	0.0312639	0.0627342
AIMP2	6.3894	5.83231	5.99877		AKR7A2	5.31681	4.40425	2.78706
AIP	10.1905	8.3018	8.18978		AKT1	8.85875	8.17751	6.61943
AJM1	1.17972	0.248505	0.252362		AKT1S1	2.48011	2.01961	2.06974
AJUBA	6.0285	4.12117	3.4065		AKT2	2.01688	1.84208	1.39493
AK1	0	0	0.0986441		AKT3	1.13255	1.06488	0.852544
AK2	16.9097	15.1923	13.55		AKTIP	2.09018	1.58274	1.09939
AK3	8.2439	6.9127	5.89543		ALAD	3.59529	3.48792	3.0446
AK3P3	1.94857	0	0		ALAS1	4.14956	3.68598	2.54247
AK4	0.0160579	0.0257738	1.55831e-23		ALCAM	0.447662	0.418402	0.290671
AK4P1	3.75463	0	3.29498		ALDH16A1	1.2424	1.10393	0.951562
AK5	0	0	0		ALDH18A1	5.37577	4.52011	3.06173
AK6	5.1782	5.24971	3.17541		ALDH1B1	2.78027	2.46472	1.46972
AK7	0.0265951	0	0.0341351		ALDH1L2	0.0199481	0.0252369	0.0110776
AK9	0.143498	0.208846	0.145113		ALDH3B1	0.0846482	0.0736249	0.0805834
AKAP1	5.1747	4.78115	4.79429		ALDH3B2	0.00835725	0.0436136	0.0437576
AKAP10	2.90078	3.03314	2.30269		ALDH4A1	0.229107	0.221413	0.146615
AKAP11	24.1759	21.181	20.1018		ALDH5A1	3.60915	3.29692	2.42017
AKAP13	1.18935	1.12334	1.1798		ALDH6A1	2.43253	2.11663	1.70659
AKAP17A	9.36287	11.8836	9.73555		ALDH8A1	0.0486908	0.012705	0.025494
AKAP1-DT	0	0.165043	0.167605		ALDH9A1	3.39981	2.80961	2.1246
AKAP3	0.154287	0	0		ALDOA	64.3197	57.9564	41.3229
AKAP5	5.17254	5.569	4.67189		ALDOC	0.207787	0.361456	0.253855
AKAP6	0.167971	0.16512	0.128484		ALG1	0.418251	0.465104	0.271864
AKAP7	0.524291	0.24297	0.209356		ALG10	10.5374	8.59416	6.61428
AKAP8	6.60853	6.88821	6.95324		ALG10B	10.6054	8.49651	7.08292
AKAP8L	3.37596	4.12741	4.27643		ALG11	2.89179	2.63159	2.31599
AKAP9	1.72936	1.81662	1.93608		ALG12	1.16514	0.883458	0.799184
AKIP1	10.2687	8.28673	7.79658		ALG13	0.566165	0.490976	0.514588
AKIRIN1	21.1791	16.6656	17.748		ALG14	0.239287	0.184219	0.196115
AKIRIN2	5.71916	4.46049	2.75019		ALG14-AS1	0.133892	0.186329	0.11684
AKNA	11.6393	11.5624	9.4633		ALG1L9P	0.0342652	0.0204783	0.019067
AKR1A1	10.5461	9.72438	8.28619		ALG2	7.50743	5.44986	3.85522
AKR1B1	11.3114	9.01571	7.45531		ALG3	10.7716	9.33059	6.52229
AKR1C1	0	0	0		ALG5	2.41061	2.12928	2.17173
AKR1C2	0	0	0		ALG6	0.866479	0.730212	0.658186
AKR1C3	0.125212	0.16579	0.0459174		ALG8	1.7326	1.48513	1.31474
AKR1C7P	0.0972969	0.0819817	0.333017		ALG9	0.734166	0.571061	0.527057
AKR1C8P	0	0.0702263	0		ALKAL2	0.60002	0.417506	0.583447
AKR1E2	0	0	0		ALKBH1	0.773842	0.828692	0.675292
AKR7A2	14.7101	9.7291	16.1059		ALKBH2	6.99488	8.04409	10.2671
AKR7A3	0	0	0		ALKBH3	1.36463	1.29579	1.20494
AKR7L	0	0.13274	0		ALKBH3-AS1	0.0820166	0.035668	0.0715717
AKT1	22.6399	19.1175	17.0241		ALKBH4	1.03485	1.45618	1.40681
AKT1S1	4.66649	4.0476	4.11043		ALKBH5	12.4194	11.7046	8.56677
AKT2	4.73304	4.02751	3.5888		ALKBH6	2.14662	2.1338	1.97545
AKT3	2.52105	2.28646	2.12363		ALKBH7	5.77145	4.21994	4.52715
AKTIP	8.08546	9.04823	6.61136		ALKBH8	2.07078	2.12878	1.63717
ALAD	9.06966	8.36987	7.68675		ALMS1	5.31151	4.82821	3.99914
ALAS1	8.92203	10.0683	8.65679		ALMS1-IT1	3.92614	3.56777	2.71023
ALCAM	0.388171	0.35822	0.374324		ALMS1P1	0	0.0466632	0
ALDH16A1	3.26617	3.79176	3.47797		ALOX12	0.133558	0.0793062	0.131358
ALDH18A1	20.4382	18.2518	14.501		ALOX12-AS1	0.0588042	0.0531849	0.057783
ALDH1A2	0	0	0		ALOX12P2	0.146223	0.121652	0.123441
ALDH1A3	0	0	0		ALOX15P1	0.00435998	0.0227532	0.0152189
ALDH1B1	2.1709	2.0121	1.48606		ALOX5AP	1.00072	0.995527	0.851448
ALDH1L2	0.0294526	0	0		ALPK1	0.486776	0.313611	0.315048
ALDH2	0.051094	0	0		ALPK3	0.0170335	0.00493843	0.00743211
ALDH3A2	0.0343881	0	0		ALS2	1.08432	0.992219	0.89017
ALDH3B1	0.0624899	0	0		ALYREF	90.2398	104.38	115.212
ALDH3B2	0.135731	0.343098	0.290352		AMACR	1.3036	1.29456	0.909723
ALDH4A1	0.702844	0.8709	0.636781		AMBRA1	0.516565	0.507473	0.397333
ALDH5A1	9.90076	9.47524	8.89018		AMD1	25.1001	20.9886	17.2051
ALDH6A1	5.89689	6.34887	5.24604		AMD1P3	5.07476	4.11997	1.32536
ALDH8A1	0.0395396	0.0333158	0		AMDHD1	0.181985	0.076414	0.0876187
ALDH9A1	11.8271	12.1668	10.1202		AMDHD2	1.73513	1.74275	1.30878
ALDOA	395.197	363.005	328.205		AMER1	3.12596	3.08903	2.34974
ALDOC	6.07443	5.97132	4.62019		AMFR	3.3781	2.79963	1.91886
ALG1	1.30162	1.19828	0.96938		AMH	5.87767	6.26502	4.67657
ALG10	29.2985	29.3612	29.0623		AMIGO1	0.114606	0.149522	0.0500053
ALG10B	34.1782	29.3882	27.1899		AMIGO2	0.187316	0.195508	0.228845
ALG11	3.72554	4.25719	3.48033		AMIGO3	0.723611	0.582499	1.24662
ALG12	2.0605	2.39471	1.58072		AMMECR1	0.284829	0.249426	0.180767
ALG13	1.09141	0.770178	0.863848		AMMECR1L	3.23332	2.76371	2.16294
ALG14	0.630207	0.365068	0.494312		AMN	0.0582883	0.126744	0.0762977
ALG1L13P	0	0	0		AMN1	0.344265	0.281991	0.273477
ALG1L2	0	0	0		AMOT	1.30676	1.13241	0.886699
ALG1L9P	0.0358522	0.0226566	0		AMOTL1	0.00654844	0.000813668	0.00571448
ALG2	22.7444	23.906	20.465		AMOTL2	0.0949671	0.0963667	0.0207182
ALG3	17.1371	21.6595	20.4682		AMPD2	1.71839	2.05075	1.46468
ALG5	2.73853	3.07662	2.86401		AMPD3	0.103946	0.0911053	0.0781487
ALG6	1.36715	1.01372	0.748693		AMPH	0.0109344	0.0117482	0.0151547
ALG8	3.84512	3.55895	3.41479		AMT	0.43878	0.327868	0.386899
ALG9	2.22897	2.14507	1.89294		AMY2B	0.201046	0.235317	0.219246
ALKAL1	0	0	0		AMZ1	0.0315412	0.0303215	0.0217297
ALKBH1	2.61531	1.53031	1.61622		AMZ2	3.23683	2.73971	2.26561
ALKBH2	16.8743	11.8151	11.3884		AMZ2P1	1.93332	1.34348	1.37996
ALKBH3	3.40971	3.2045	3.14202		ANAPC1	0.971704	0.85729	0.632789
ALKBH4	4.49984	3.53877	2.95196		ANAPC10	0.221205	0.209767	0.215797
ALKBH5	36.5381	33.7478	31.4706		ANAPC10P1	10.603	9.2222	14.2541
ALKBH6	4.04329	4.25857	4.32463		ANAPC11	3.17997	3.1029	2.81689
ALKBH7	16.8512	12.8676	14.4191		ANAPC13	3.65196	3.36483	2.66537
ALKBH8	2.91556	3.01024	2.63532		ANAPC15	19.0902	20.8381	21.3565
ALMS1	5.73403	4.94985	5.1053		ANAPC16	11.1719	9.94427	8.90708
ALMS1-IT1	3.33099	4.00954	4.47895		ANAPC1P1	0.0248852	0.0181389	0.0563555
ALOX12	0	0	0		ANAPC1P2	1.46891	1.3437	1.2527
ALOX12-AS1	0.0376945	0.00794028	0.0403176		ANAPC1P3	3.02246	0.722634	2.18826e-12
ALOX12P2	0.0903466	0.141376	0.077307		ANAPC1P4	0.0191915	0.0688558	0.0263835
ALOX15	0	0	0		ANAPC1P6	0.104997	0.0839117	1.65509e-06
ALOX15P1	0	0	0		ANAPC2	2.13952	2.32362	1.68539
ALOX5	0	0	0		ANAPC4	3.17997	2.73898	2.1647
ALOX5AP	0.939618	0.663329	0.890924		ANAPC5	2.49117	2.20457	1.69605
ALPK1	0.798812	0.652257	0.669428		ANAPC7	4.66545	4.12967	3.03925
ALS2	2.10252	1.81153	2.05607		ANG	0.0323077	0.0612547	0.0468634
ALS2CL	0	0	0		ANGEL1	1.17645	1.01314	0.696797
ALYREF	210.009	210.077	201.24		ANGEL2	10.0835	8.22035	7.01482
AMACR	3.00746	3.22978	3.17882		ANGPT1	0.00512784	0.00501758	0.00615285
AMBRA1	0.988163	0.816078	0.727952		ANGPT2	0.989292	0.869154	0.767382
AMD1	60.0905	53.6943	48.5785		ANGPTL1	0.207087	0.192985	0.258163
AMDHD1	0.254796	0.300565	0.436043		ANGPTL3	0.271772	0.189105	0.189729
AMDHD2	2.45535	2.06886	1.80084		ANGPTL4	0.0718873	0.0500207	0.0501858
AMER1	8.67093	7.4649	6.88183		ANGPTL7	0.0240427	0.125471	0.104904
AMFR	6.33867	5.90223	4.71561		ANKAR	0.128339	0.119599	0.137594
AMH	4.6794	5.91425	4.80484		ANKDD1A	0.179949	0.151051	0.136692
AMIGO1	0	0	0		ANKDD1B	0.00677121	0.00392629	0.015757
AMIGO2	1.82533	1.28168	1.8222		ANKFN1	0.000753082	0.000655012	0.00175247
AMIGO3	2.3295e-06	0.00107055	0.767524		ANKFY1	2.09404	1.94922	1.3491
AMMECR1	0.919927	0.894715	0.764666		ANKH	1.03912	0.912101	0.72693
AMMECR1L	9.83495	6.18155	6.95984		ANKHD1	5.6613	5.48419	4.99412
AMN	0.591665	0.199413	0.101254		ANKHD1-EIF4EBP3	0.349204	0.195027	0.223568
AMN1	0.490941	0.357255	0.477369		ANKIB1	1.50196	1.38821	0.927768
AMOT	2.32129	1.84085	1.91949		ANKLE1	0.0530926	0.0923574	0.0926624
AMOTL1	0.0455802	0.0128018	0.0715031		ANKLE2	10.4159	9.50204	8.16711
AMOTL2	1.73516	1.29959	0.93483		ANKMY1	0.325021	0.301734	0.251208
AMPD2	10.628	7.24607	6.31724		ANKMY2	1.57066	1.26726	1.00749
AMPD3	0.493473	0.32279	0.261129		ANKRA2	3.59779	2.96395	2.63295
AMT	0	0.369056	0.187392		ANKRD1	0.0708768	0.107882	0.0463879
AMY1A	0	0	0		ANKRD10	3.79464	3.64191	3.58162
AMY1B	0	0	3.61713e-26		ANKRD10-IT1	0.983958	0.916954	0.797317
AMY1C	0	0	0		ANKRD11	2.67007	2.89075	3.10165
AMY2A	0.104801	3.82637e-05	0		ANKRD11P2	0.817005	2.07524	0.979604
AMY2B	0.471676	0.423857	0.739264		ANKRD12	4.11847	3.75243	3.86225
AMZ1	0.0269612	0.034076	0.011535		ANKRD13A	5.88978	5.52339	4.19223
AMZ2	10.3035	8.0991	7.74079		ANKRD13B	0.255001	0.266152	0.222526
AMZ2P1	2.44442	2.42996	4.1754		ANKRD13C	1.16	1.11316	0.91206
ANAPC1	3.38027	2.97501	2.93171		ANKRD13D	1.75209	2.29114	1.81366
ANAPC10	0.277699	0.299132	0.312035		ANKRD16	0.497672	0.373653	0.249754
ANAPC10P1	0	12.2597	4.16544		ANKRD17	4.80947	4.67122	3.69826
ANAPC11	10.6532	7.69397	7.05376		ANKRD18B	0.01436	0.0299414	0.00438638
ANAPC13	13.6407	10.6467	10.4433		ANKRD18CP	0.185342	0.15322	0.133308
ANAPC15	32.3312	33.2013	23.5151		ANKRD18EP	15.4367	12.9526	11.1993
ANAPC16	29.1851	26.6222	24.1925		ANKRD19P	0.694733	0.887064	0.79933
ANAPC1P1	0.503881	0.386371	0.258143		ANKRD20A1	0.311752	0.27632	0.350341
ANAPC1P2	1.32487	0.859317	1.46729		ANKRD20A11P	0.603488	0.566141	0.718169
ANAPC1P4	0.0989753	0.790215	1.19291		ANKRD20A17P	0.811288	0.146385	0.386459
ANAPC1P6	1.49422	0.619652	0.42882		ANKRD20A21P	0.221506	0.240459	0.313035
ANAPC2	5.07136	4.11483	4.82157		ANKRD20A2P	0.062551	0.00487958	0.0703486
ANAPC4	6.99703	6.60947	5.96031		ANKRD20A3P	0.18615	0.13607	0.0888153
ANAPC5	7.11498	6.18537	5.70155		ANKRD20A4P	0.214656	0.222964	0.169948
ANAPC7	11.8764	11.8692	11.6705		ANKRD20A5P	1.48811	1.27379	1.39843
ANG	0	0	0		ANKRD20A7P	0.0827795	0.101606	0.134337
ANGEL1	3.64945	3.03015	3.13283		ANKRD20A8P	0.0449991	0.0103934	0.0321293
ANGEL2	15.1312	16.4316	13.9756		ANKRD20A9P	0.0268876	0.00707188	0.0296068
ANGPT1	0.0312306	0.0175431	0.0489925		ANKRD23	0.0690769	0.0375238	0.052701
ANGPT2	1.48094	1.04271	1.02417		ANKRD26	1.9215	1.92065	1.78652
ANGPTL6	0	0	0		ANKRD26P4	0.585417	0.339454	1.02173
ANK2	0	0	0		ANKRD27	3.01679	2.59954	1.92335
ANKAR	0.133995	0.125448	0.140135		ANKRD28	3.22392	2.74633	2.10335
ANKDD1A	0.221219	0.209697	0.260275		ANKRD31	0.020786	0.014792	0.00906941
ANKDD1B	0.0366572	0	0		ANKRD33B	2.0667	1.58765	1.39415
ANKEF1	0	0	0		ANKRD34A	0.341313	0.296866	0.243692
ANKFY1	3.99102	3.51517	3.3487		ANKRD36	4.02261	3.5402	3.72291
ANKH	1.54197	1.4233	1.25312		ANKRD36B	2.07664	1.86464	1.9636
ANKHD1	6.28337	6.20776	5.43111		ANKRD36BP2	0.235408	0.232702	0.359619
ANKHD1-EIF4EBP3	0.456694	0.523874	0.626668		ANKRD36C	3.31959	2.88028	3.30581
ANKIB1	1.78997	1.77478	1.53162		ANKRD37	0.435655	0.249821	0.67932
ANKLE1	0	0.181638	0		ANKRD39	1.20096	1.21379	1.11039
ANKLE2	19.3027	19.1151	16.1816		ANKRD40	18.8703	17.0438	13.7746
ANKMY1	0.576404	0.424965	0.39457		ANKRD42	0.0632363	0.0815146	0.0572989
ANKMY2	3.45673	3.00733	2.7414		ANKRD44	0.483331	0.401062	0.312697
ANKRA2	3.35991	2.34572	3.53212		ANKRD44-IT1	0.0154205	0.0134124	0.0107653
ANKRD10	4.6753	3.87969	3.87929		ANKRD46	1.58603	1.42921	1.0838
ANKRD10-IT1	0.570734	1.20224	0.976722		ANKRD49	24.2126	18.9808	15.3689
ANKRD11	1.84433	1.78948	1.673		ANKRD49P1	2.45468	2.13502	1.36314
ANKRD11P2	8.14625	1.1821	1.25533		ANKRD50	6.29016	5.60763	4.57517
ANKRD12	2.01303	2.11111	2.20302		ANKRD52	5.33478	4.92965	3.72971
ANKRD13A	10.6179	9.43018	8.1578		ANKRD54	1.92322	1.93275	1.56257
ANKRD13B	0.621224	0.959638	0.487267		ANKRD6	0.0152951	0.0183323	0.0168928
ANKRD13C	1.64881	1.4576	1.34145		ANKRD61	0.307767	0.240919	0.188001
ANKRD13D	2.35496	2.48034	1.76319		ANKRD62	0.0547224	0.0439951	0.019353
ANKRD16	1.55495	1.34874	1.05659		ANKRD62P1	0.13535	0.117654	0.282537
ANKRD17	9.00142	8.03138	7.91722		ANKRD62P1-PARP4P3	0.0728879	0.0352417	0.0433919
ANKRD18A	0	0	0		ANKRD7	0.00905602	0.0113228	0.00839664
ANKRD18B	0	0	0		ANKS1A	0.294777	0.295466	0.256549
ANKRD18CP	0.0600248	0.101153	0.102723		ANKS3	0.323972	0.391568	0.271699
ANKRD18DP	0.14271	0.120246	0.0407042		ANKS6	0.121373	0.0992331	0.0847326
ANKRD20A1	0.0762412	0.0715465	0.132893		ANKUB1	0.00159805	0.00608905	0.0014121
ANKRD20A11P	0.200841	0.123074	0.141399		ANKZF1	6.42221	6.81157	6.35023
ANKRD20A21P	0.133387	0.305061	0.108252		ANLN	8.58529	8.18866	7.01822
ANKRD20A3P	0.123802	0.0540651	0.103239		ANO10	0.0241313	0.0242812	0.0156904
ANKRD20A4P	0.471324	0.0873152	0.468832		ANO6	1.3378	1.22206	0.947132
ANKRD20A5P	0.502874	0.245241	0.244739		ANO8	0.794395	0.786249	0.788845
ANKRD20A7P	2.14488e-10	0.0443296	0.114521		ANO9	0.019851	0.0230213	0.0230973
ANKRD22	0	0	0		ANOS1	0.00156772	0.00409071	0.00478825
ANKRD23	4.23705e-25	0.0480097	0.0331382		ANOS2P	0.0366364	0.0452019	0.0265026
ANKRD24	0.0312065	0.0788832	0.0534051		ANP32A	12.4142	12.2746	11.466
ANKRD26	1.53177	1.69506	1.3369		ANP32AP1	0.173127	0.0830784	0.136824
ANKRD26P3	0	0	0		ANP32B	21.4202	25.3076	26.212
ANKRD27	6.82756	4.41052	4.88237		ANP32BP1	25.0552	25.0168	17.3196
ANKRD28	6.92167	6.15489	5.76741		ANP32D	0.299494	0.651232	0.784059
ANKRD31	0.0306897	0.0581826	0.0393904		ANP32E	152.841	147.115	130.301
ANKRD33B	3.6022	3.57013	2.76345		ANTKMT	0.475615	0.413678	0.415044
ANKRD34A	0	0.424613	0.215602		ANTXR1	0.848769	0.771688	0.603493
ANKRD36	1.55888	1.48286	1.77604		ANTXR2	0.602351	0.553565	0.433901
ANKRD36B	1.33356	1.05417	1.43846		ANTXRLP1	0.0200804	0.0209587	0.0315418
ANKRD36BP2	0.12683	0.0801494	0.0830388		ANXA1	23.5269	20.5003	15.323
ANKRD36C	1.58136	1.2669	1.4271		ANXA11	2.08328	2.16424	1.78236
ANKRD37	2.52706	3.31222	0.480518		ANXA2	0.0961603	0.0574817	0.0644402
ANKRD39	1.45064	1.80945	1.55159		ANXA2P2	2.24211	0.934182	0.976249
ANKRD40	53.8922	45.0389	44.3086		ANXA2R	7.58513	8.11351	6.03753
ANKRD42	0.199451	0.244135	0.227149		ANXA4	0.306124	0.264742	0.212341
ANKRD44	0.642872	0.532177	0.553304		ANXA6	5.1054	5.3	4.3797
ANKRD46	3.49128	3.50846	2.92109		ANXA7	3.05761	2.81309	2.33795
ANKRD49	25.1839	22.5826	21.1538		AOAH	0.0218355	0.0183371	0.0170836
ANKRD50	11.0025	10.1663	9.93753		AOC2	0.286005	0.203531	0.136136
ANKRD52	15.153	13.5625	11.7824		AOPEP	0.0358036	0.0269201	0.0235294
ANKRD54	5.18298	4.9573	2.99657		AP1AR	5.36201	4.60167	3.78446
ANKRD55	0	0	0		AP1B1	2.39454	2.34368	1.88053
ANKRD6	0.0193418	0	0.0165502		AP1G1	4.47705	3.76683	2.79813
ANKRD61	0	0.210584	0		AP1G2	5.47192	5.46458	4.45913
ANKRD63	0	0.232302	0		AP1M1	4.05182	3.97984	3.18861
ANKRD7	0	0.00774551	0		AP1S1	2.36509	2.56166	2.00548
ANKRD9	0.161067	0.135714	0		AP1S2	4.10147	3.03106	2.47783
ANKS1A	0.550434	0.49615	0.564094		AP1S3	0.0102845	0.0112353	0.00805169
ANKS3	0.580832	0.374251	0.350824		AP2A1	1.48257	1.71295	1.29674
ANKS6	0.078849	0.0332188	0.0674689		AP2A2	1.08529	1.05818	0.741742
ANKZF1	16.1333	12.8035	10.4339		AP2B1	3.39317	2.93353	2.11492
ANLN	13.7939	12.7133	11.9242		AP2B1P1	1.95352	1.4537	0.904621
ANO10	0.0537927	0.0420879	0.02959		AP2M1	74.2519	73.956	55.3619
ANO5	0	0	0		AP2S1	2.64486	2.66022	2.11114
ANO6	2.55569	2.39086	2.26998		AP3B1	1.0376	0.915281	0.774058
ANO7	0	0	0		AP3D1	5.51928	5.41181	4.83396
ANO8	1.44589	1.49945	0.856531		AP3M1	10.1608	8.96391	6.09201
ANO9	0	0	0		AP3M2	4.58561	4.36586	3.32603
ANOS1	0.00636538	0	0.00544668		AP3S1	1.95921	1.59373	1.43389
ANOS2P	0.0230905	0.011601	0.0352641		AP3S2	1.19734	1.10713	0.82246
ANP32A	24.1563	22.5662	21.0824		AP4B1	4.96069	4.62352	3.55779
ANP32AP1	0.116569	0.1372	0.142208		AP4B1-AS1	0.0545539	0.0613332	0.0384186
ANP32B	30.5394	30.6476	29.1457		AP4E1	2.24681	1.96276	1.7204
ANP32BP1	21.4039	26.4449	23.6454		AP4M1	1.81493	1.40678	1.08079
ANP32C	0	7.75656	10.1879		AP4S1	0.323669	0.244977	0.20699
ANP32D	8.51219	12.2954	13.071		AP5B1	6.45967	5.55973	3.59433
ANP32E	203.12	194.257	166.128		AP5M1	7.21874	5.9162	4.62083
ANPEP	0	0	0		AP5S1	3.00382	2.38122	1.88774
ANTKMT	0.643708	0	0.550803		AP5Z1	2.20551	2.11751	1.63186
ANTXR1	2.75589	2.61755	2.48471		APAF1	1.51469	1.34979	1.01954
ANTXR2	1.59202	1.59902	1.37212		APBA3	1.15256	0.917606	0.678752
ANTXRLP1	0.0978388	0.109918	0.111624		APBB1	0.209896	0.176858	0.194613
ANXA1	180.086	166.627	156.248		APBB1IP	4.62869	4.89937	4.93597
ANXA11	5.15799	3.96731	4.27183		APBB3	1.25365	1.48669	1.21413
ANXA2	4.39876	3.466	3.76926		APC	2.93071	2.66093	2.23478
ANXA2P1	1.42006	0	2.39118		APC2	0.171495	0.217524	0.213073
ANXA2P2	85.5569	86.3141	65.3354		APCDD1L	0.0198106	0.0147692	0.0271664
ANXA2R	10.1852	8.58201	9.55863		APCDD1L-DT	0.00914732	0.0145862	0.00798239
ANXA4	0.871124	0.692231	0.654495		APEH	9.90419	9.08758	7.52586
ANXA5	0	0	0		APEX1	116.628	106.593	93.6936
ANXA6	11.515	10.1991	9.2712		APEX2	3.17013	3.37889	2.44659
ANXA7	9.42773	8.72692	7.81137		APH1A	12.7698	10.255	8.49571
ANXA8	0	0	0		APH1B	2.37729	2.04259	1.71338
ANXA9	0	0	0		API5	23.0745	21.2305	15.3165
AOAH	0.0122287	0.0206077	0.00523189		API5P1	1.0931	1.25514	1.35943
AOC1	0	0	0		API5P2	0.427032	0.650582	0.840056
AOC2	0	0.355807	0.36133		APIP	1.55244	1.33987	1.10153
AOC3	0	0.31386	0.318732		APLF	0.575412	0.518144	0.487364
AOPEP	0.0502522	0.0393177	0.0491421		APLN	2.77655	2.61503	1.69176
AOX1	0	0	0		APLP1	0.0401877	0.0582572	0.0350697
AP1AR	11.5715	9.93457	7.49296		APLP2	7.85796	7.70777	6.23877
AP1B1	7.69039	7.71847	6.01693		APMAP	4.58543	4.11997	3.02174
AP1G1	11.325	9.28408	8.40668		APOA1	0.170225	0.370145	0.22282
AP1G2	7.45342	7.04921	8.46019		APOA1-AS	0.0160116	0.0696323	0.0698623
AP1M1	6.86601	6.64738	5.99026		APOBEC2	0.0272594	0.0592738	0.0594696
AP1S1	10.69	12.9767	10.5425		APOBEC3C	5.47974	6.41594	4.02258
AP1S2	6.77343	8.18181	6.39164		APOBEC3D	0.578728	0.463239	0.416188
AP1S3	0.164783	0.138891	0.133134		APOBEC3F	0.483048	0.45501	0.363746
AP2A1	3.48348	3.23411	3.3947		APOBEC3G	1.43717	1.50252	1.1151
AP2A2	2.05886	1.87207	1.72369		APOBEC4	0.0905033	0.0196794	0.138211
AP2B1	9.80146	7.87641	7.4615		APOBR	0.589024	0.860687	0.758557
AP2B1P1	5.11353	3.14804	3.58579		APOL1	1.46549	1.48549	1.0577
AP2M1	138.563	140.984	123.51		APOL2	3.66278	3.76045	3.62114
AP2S1	10.2808	7.03295	6.53242		APOL3	2.08965	2.05879	1.91497
AP3B1	1.36743	1.23049	1.21552		APOL4	2.52423	2.31015	1.90199
AP3B2	0	0	0		APOL6	17.3309	15.3795	12.9573
AP3D1	8.11193	7.60786	7.01091		APOLD1	0.390511	0.298422	0.326415
AP3M1	18.654	18.9968	15.7084		APOM	0.171876	0.302638	0.348838
AP3M2	12.2974	10.0125	10.1087		APOO	0.491327	0.496038	0.439728
AP3S1	3.10568	2.95729	3.70959		APOOL	0.568094	0.448597	0.386888
AP3S2	2.03998	1.61924	1.09484		APP	0.00164497	0.00286151	0.00334945
AP4B1	10.2258	6.5364	7.44245		APPBP2	1.72784	1.54787	1.17812
AP4E1	3.96578	4.29467	3.0404		APPL1	18.4382	16.6226	13.0048
AP4M1	3.82405	4.08962	3.77554		APPL2	1.00046	0.91203	0.618868
AP4S1	0.415437	0.175022	0.177739		APRT	10.054	9.33124	7.11516
AP5B1	19.9223	18.3264	15.0138		APTR	0.24348	0.294329	0.237681
AP5M1	13.5811	11.9918	11.6581		APTX	0.325658	0.303359	0.270994
AP5S1	8.71386	7.21114	5.17646		AQP11	0.15199	0.0727084	0.0994752
AP5Z1	5.02855	2.84403	2.18087		AQP3	2.96844	2.8831	2.4393
APAF1	3.01417	2.72113	2.137		AQP4-AS1	0.00302618	0.00465554	0.00170787
APBA1	0	0	0		AQR	2.88514	2.61161	1.95898
APBA2	0	0.0139868	0		ARAF	5.16516	4.82915	3.715
APBA3	2.13253	1.89668	1.52062		ARAP1	1.22282	1.27065	0.966818
APBB1	0.852236	0.538566	1.23058		ARAP1-AS2	0.578806	0.166733	0.399886
APBB1IP	3.06816	3.0652	3.11278		ARAP2	1.47934	1.29465	1.0629
APBB2	0	0	0		ARCN1	23.3508	22.1866	17.2734
APBB3	0.794506	1.33889	1.18971		AREL1	2.80319	2.55193	1.94066
APC	3.31992	2.88382	2.90978		ARF1	48.5235	42.7725	29.2392
APC2	0.384175	0.404629	0.205455		ARF3	13.1772	11.5756	8.54535
APEH	38.9793	31.749	29.7958		ARF4	7.29853	5.88263	4.00688
APEX1	266.087	255.025	252.982		ARF4-AS1	0.502185	0.200585	0.736739
APEX2	8.63065	6.26908	7.385		ARF5	16.2386	12.7922	9.94878
APH1A	34.0325	31.5431	25.4144		ARF6	155.08	131.397	98.4443
APH1B	4.68943	3.39152	3.74511		ARFGAP1	5.49966	4.88126	3.46659
API5	48.4486	46.7751	40.8146		ARFGAP2	7.91251	7.63839	6.22835
API5P1	42.4244	40.9409	32.5333		ARFGAP3	7.80809	6.59333	4.29272
APIP	5.61732	4.96122	4.72181		ARFGEF1	3.4111	3.08308	2.27948
APLF	0.481009	0.445825	0.399827		ARFGEF1-DT	1.14524	0.622562	0.624618
APLN	2.13463	1.91104	1.48407		ARFGEF2	4.01572	3.46988	2.57079
APLP2	13.282	11.0633	10.7441		ARFIP1	0.302498	0.248099	0.15457
APMAP	9.06613	8.22388	7.46068		ARFIP2	7.82941	6.91178	5.78907
APOA1	0	0	0		ARFRP1	8.18421	8.49156	6.57862
APOBEC3B	0	0	0.211726		ARG1	0.00421135	0.00122098	0.00735006
APOBEC3C	15.6843	19.4503	13.9842		ARG2	0.147781	0.206206	0.169047
APOBEC3D	1.87343	0.00435707	1.91117		ARGFXP2	0.891778	0.258549	1.03761
APOBEC3F	1.46857	1.42454	0.864426		ARGLU1	15.003	16.5471	19.9643
APOBEC3G	3.15072	2.96109	4.8735		ARHGAP1	2.19977	1.97218	1.59477
APOBEC3H	0	0	0		ARHGAP10	0.00420875	0.00691459	0.00775359
APOBR	1.49475	1.00757	0.511605		ARHGAP11A	39.328	37.9906	32.9449
APOC1	0	0	0		ARHGAP11B	2.06794	1.27607	1.26934
APOC2	0	0	0		ARHGAP12	1.35358	1.17955	0.849018
APOC4-APOC2	0	0	0		ARHGAP15	0.921401	0.798751	0.592932
APOE	0.359105	0	0		ARHGAP15-AS1	0.100145	0.0666088	0.0514068
APOL1	2.95278	3.01575	2.37348		ARHGAP17	0.814214	0.865078	0.603654
APOL2	6.2123	6.82065	4.91299		ARHGAP18	0.300723	0.260528	0.183594
APOL3	2.50281	2.65715	2.48424		ARHGAP19	7.29363	6.37748	4.31288
APOL4	0.0823219	0.277456	0.493084		ARHGAP19-SLIT1	0.0460046	0.0208404	0.0845105
APOL6	33.8389	27.6932	24.462		ARHGAP21	3.9548	3.75688	3.17913
APOLD1	0.327188	0.508586	0.436565		ARHGAP23	0.798123	0.720842	0.616395
APOM	0	0.376253	0		ARHGAP23P1	0.117501	0.0778152	9.43065e-06
APOO	1.26634	1.72476	0.964824		ARHGAP25	0.744533	0.734171	0.630827
APOOL	1.41768	1.73085	1.20069		ARHGAP26	0.350529	0.319687	0.285577
APP	0.0489794	0.0600287	0.0342903		ARHGAP27	0.9505	1.02261	0.802945
APPBP2	3.3014	3.35908	3.19802		ARHGAP27P1-BPTFP1-KPNA2P3	0.536348	0.474782	0.295898
APPL1	42.8371	36.7869	34.6551		ARHGAP29	0.0063186	0.0109915	0.0121306
APPL2	1.02839	0.849181	0.862362		ARHGAP30	17.5628	18.7844	17.2705
APRT	42.8132	44.8829	37.06		ARHGAP31	0.0151345	0.00767878	0.00880473
APTR	0.301605	0.310604	0.487475		ARHGAP33	2.40648	2.09654	1.4934
APTX	1.16748	1.06241	1.0789		ARHGAP35	2.68391	2.56714	1.88466
AQP1	0	0	0		ARHGAP39	0.00623702	0.0216992	0.0145139
AQP11	0	0	0		ARHGAP4	4.56961	5.14804	3.63737
AQP3	3.21404	1.35407	2.23451		ARHGAP42	0.162109	0.141805	0.103831
AQR	6.3727	5.77621	5.6031		ARHGAP44	0.0240936	0.013862	0.0219386
AR	0.00693387	0	0		ARHGAP45	8.46441	7.98461	6.6008
ARAF	7.85692	6.51834	5.58522		ARHGAP5	19.6762	17.7691	13.5369
ARAP1	2.51544	2.34048	2.02998		ARHGAP5-AS1	0.603526	0.599923	0.677142
ARAP2	1.48471	1.45705	1.36757		ARHGAP6	0.000581214	0.00126381	0.00101439
ARAP3	0	0	0		ARHGAP9	2.59903	3.03049	2.0487
ARC	0	0	0		ARHGDIA	89.8144	89.4836	63.8552
ARCN1	52.651	46.6399	44.4738		ARHGDIB	81.5005	75.3015	53.3616
AREL1	6.50385	5.8637	4.61908		ARHGEF1	5.9014	6.35418	4.75619
ARF1	129.519	115.123	108.349		ARHGEF10	0.214445	0.193155	0.166855
ARF3	32.6362	29.3022	29.0953		ARHGEF11	0.0186767	0.0299899	0.0200593
ARF4	35.7932	31.3364	23.8257		ARHGEF17	0.0130358	0.00907056	0.00455026
ARF4-AS1	1.90441	0	1.62955		ARHGEF18	1.45855	1.521	1.17602
ARF4P1	14.3496	8.06057	8.18569		ARHGEF19	0.387588	0.32775	0.225485
ARF5	32.7854	27.9338	23.7119		ARHGEF2	1.79122	1.60168	1.4315
ARF6	516.174	482.67	442.511		ARHGEF26	0.0151383	0.0151926	0.0111781
ARFGAP1	16.7381	15.0009	14.3223		ARHGEF3	0.842124	0.696625	0.47965
ARFGAP2	19.3669	21.588	15.536		ARHGEF33	0.00744711	0.0113353	0.00162468
ARFGAP3	11.6773	11.6266	9.84821		ARHGEF38	0.00253508	0.0095368	0.0110927
ARFGEF1	6.99087	6.18502	5.52678		ARHGEF39	1.86388	1.3468	1.22013
ARFGEF1-DT	0	0.979508	1.98942		ARHGEF4	0.00378728	0.0039529	0.00198298
ARFGEF2	6.92033	6.11547	5.70969		ARHGEF40	0.0717851	0.0416246	0.0557095
ARFGEF3	0	0	0		ARHGEF6	5.59103	4.81141	3.75478
ARFIP1	1.13015	0.826339	0.895109		ARHGEF7	3.13366	2.72047	2.2451
ARFIP2	17.1321	19.4076	13.0306		ARHGEF9	1.39031	1.31818	1.01942
ARFRP1	18.8894	23.5837	18.6407		ARID1A	14.0498	12.5798	10.7263
ARG2	0.691922	0.377241	0.592058		ARID1B	1.70906	1.62177	1.46491
ARGLU1	10.4623	10.1749	9.57978		ARID2	3.94547	3.48132	2.76856
ARHGAP1	5.27655	4.39967	3.85656		ARID3A	2.49139	2.45895	1.80179
ARHGAP10	0.0493672	0.0575951	0.0519903		ARID3B	0.954585	0.881974	0.794803
ARHGAP11A	67.8081	63.0764	60.379		ARID3BP1	0.85082	0.306815	0.131997
ARHGAP11B	2.57607	1.17625	1.84924		ARID4A	3.91651	3.98003	3.80688
ARHGAP12	2.14806	1.77462	1.73941		ARID4B	2.45228	2.49118	2.56215
ARHGAP15	1.23462	1.21581	1.26249		ARID5A	2.42626	2.77304	2.18726
ARHGAP17	1.94862	1.5966	1.98935		ARID5B	0.0383515	0.0319378	0.0242104
ARHGAP18	1.80498	1.65913	1.42058		ARIH1	2.26374	2.02346	1.49938
ARHGAP19	19.8573	17.8294	16.4258		ARIH2	2.38151	2.18723	1.94311
ARHGAP19-SLIT1	1.15069e-08	1.06194e-10	0.00793102		ARIH2OS	4.89308	4.52188	4.00307
ARHGAP21	5.44985	4.91259	5.03795		ARL1	15.1102	12.8116	11.1369
ARHGAP22	0	0	0		ARL10	0.0437975	0.0304752	0.0268207
ARHGAP23	0.458587	0.655713	0.427362		ARL13B	1.77386	1.76117	1.59029
ARHGAP24	0.0122636	0.0103332	0.00839488		ARL14EP	3.93059	3.62954	3.35645
ARHGAP25	0.421814	0.399845	0.383493		ARL14EPP1	1.32432	1.30205	0.254071
ARHGAP26	0.378027	0.304261	0.308983		ARL15	0.085521	0.0717856	0.0554021
ARHGAP27	1.56463	1.29144	0.901648		ARL16	31.3658	30.2004	23.8567
ARHGAP27P1-BPTFP1-KPNA2P3	0.636201	0.565157	0.617033		ARL17A	0.509921	0.402418	0.356005
ARHGAP29	0.0307862	0	0.0614668		ARL17B	0.433849	0.386231	0.368481
ARHGAP30	45.6853	42.0455	40.5823		ARL2	1.56439	1.50691	1.09994
ARHGAP31	0.0204834	0.0517775	0.0438176		ARL2BP	8.32593	8.24609	5.87601
ARHGAP32	0	0	0		ARL2-SNX15	0.678871	0.413698	0.303637
ARHGAP33	1.53912	1.06799	0.929632		ARL3	0.987322	1.17908	1.2069
ARHGAP35	6.42972	5.63706	5.25582		ARL4AP5	1.32997	2.0822	3.4818
ARHGAP4	9.69353	7.67993	8.34937		ARL4C	184.564	169.58	125.861
ARHGAP42	0.177209	0.199087	0.140802		ARL4D	1.4856	0.646071	0.713025
ARHGAP44	0	0	0		ARL5A	5.48166	4.71523	3.48899
ARHGAP45	17.1839	14.7423	12.3512		ARL5B	10.9334	8.8482	6.83023
ARHGAP5	41.6416	40.2261	36.5441		ARL6	0.785609	0.653102	0.420426
ARHGAP5-AS1	0	4.12952	5.99088		ARL6IP1	93.6841	75.6566	59.9513
ARHGAP9	8.0519	9.08988	8.69584		ARL6IP1P2	4.24731	3.447	0.988497
ARHGDIA	294.99	269.419	246.361		ARL6IP1P3	1.13808	1.48481	0.993142
ARHGDIB	176.892	160.059	151.247		ARL6IP4	35.8176	43.1925	55.5947
ARHGEF1	9.69468	9.07372	8.57827		ARL6IP5	10.2274	8.68603	6.55903
ARHGEF10	0.17672	0.132753	0.0985443		ARL6IP6	3.14695	2.41636	1.96825
ARHGEF10L	0	0	0		ARL8A	3.70903	3.82472	2.46385
ARHGEF11	0.0116665	0.0491507	0		ARL8B	5.75257	4.93734	3.61685
ARHGEF12	0	0	0		ARMC1	8.35778	6.27896	4.93817
ARHGEF16	0	0	0		ARMC10	2.78176	2.73883	2.15373
ARHGEF17	0.211715	0.267584	0.163043		ARMC10P1	17.4494	14.1519	9.37071
ARHGEF18	2.65999	2.65602	2.41049		ARMC2	0.146615	0.175892	0.147796
ARHGEF19	0.786856	0.589333	0.52367		ARMC5	2.31042	2.06379	1.2276
ARHGEF2	3.20133	3.1138	2.79444		ARMC6	2.1977	1.80524	1.2874
ARHGEF2-AS2	0	0	0		ARMC7	1.29372	1.60944	1.3137
ARHGEF3	1.7942	1.56754	1.39053		ARMC8	2.32824	1.95397	1.50628
ARHGEF39	1.97977	1.86062	1.82434		ARMC9	0.113487	0.0854952	0.0849977
ARHGEF40	0	0	0		ARMCX3	9.37613	9.96719	8.70549
ARHGEF6	16.4162	15.0983	12.7228		ARMCX5	11.027	9.66244	7.52775
ARHGEF7	2.42962	2.23537	1.98052		ARMCX5-GPRASP2	0.190259	0.172013	0.195855
ARHGEF9	1.5959	1.24463	1.16232		ARMCX5-GPRASP2	0.0977479	0.0241811	0.0616874
ARID1A	23.3528	24.2036	22.1999		ARMCX6	9.70351	7.91789	8.00285
ARID1B	1.80644	1.7553	1.561		ARMCX7P	0.04935	2.05404	0.000352529
ARID2	8.13301	6.86508	6.34463		ARMH3	0.285986	0.246769	0.232399
ARID3A	3.6371	3.41235	3.44325		ARMH4	0.00160183	2.8979e-13	0.00465943
ARID3B	2.09297	2.08263	1.96428		ARMT1	7.00932	6.32954	3.95053
ARID3BP1	2.25166	1.46608	2.81694e-23		ARNT	2.48285	2.25882	1.8097
ARID4A	3.38121	3.34068	3.12819		ARNTL	0.688516	0.658991	0.505302
ARID4B	2.20144	2.17145	2.16846		ARNTL2	0.0792897	0.0779596	0.0586628
ARID5A	4.31502	5.48801	4.11023		ARPC1A	3.30258	3.30347	2.35481
ARID5B	0.636123	0.362912	0.396894		ARPC1B	4.75367	4.28863	3.195
ARIH1	5.19922	5.21077	4.78443		ARPC2	12.5526	11.4802	8.77588
ARIH2	5.41962	5.30881	4.85045		ARPC3	49.3615	45.4691	42.9351
ARIH2OS	3.72511	5.23125	3.18747		ARPC3P1	13.0683	12.3579	9.33118
ARL1	27.6302	27.6695	24.5488		ARPC3P3	11.0451	10.9684	10.6599
ARL10	0	0.0299676	0		ARPC3P4	2.64828	1.9665	1.87317
ARL11	0	0	0		ARPC3P5	20.935	12.4211	18.3199
ARL13B	3.15156	2.8431	2.59411		ARPC4	6.62322	5.25901	4.63252
ARL14EP	6.24678	5.4077	6.95607		ARPC4-TTLL3	0.235539	0.427583	0.255706
ARL15	0.178926	0.17376	0.127153		ARPC5	27.7104	23.2858	21.8177
ARL16	36.6699	44.2591	35.1936		ARPC5L	3.89036	3.4015	4.15231
ARL17A	0.0183597	0.356285	0.472508		ARPIN-AP3S2	0.0218056	0.000680898	0.0233319
ARL17B	0.715397	0.259461	0.319565		ARPP19	43.0155	34.6593	24.2474
ARL2	8.17385	6.85257	6.77069		ARPP21	11.885	11.6608	10.3971
ARL2BP	17.6077	19.6513	14.1412		ARPP21-AS1	31.4148	20.8855	27.2565
ARL2-SNX15	0.0893853	0.131153	0.995407		ARRB1	0.657985	0.538885	0.43636
ARL3	0.795395	0.938273	0.789493		ARRB2	7.27686	6.97741	5.18977
ARL4A	0	6.14893e-24	1.2594e-32		ARRDC1	1.5808	1.18875	1.03461
ARL4AP5	4.32005	3.64004	5.54481		ARRDC1-AS1	3.11977	3.2562	1.98351
ARL4C	481.88	468.069	409.307		ARRDC2	1.59687	1.95517	1.42387
ARL4D	3.61917	1.52474	4.1291		ARRDC3	23.5308	19.73	14.579
ARL5A	25.3195	21.1203	18.9088		ARRDC3-AS1	0.00820333	0.0101452	0.00898121
ARL5B	19.633	19.1443	15.4036		ARRDC4	1.90503	2.06855	1.18593
ARL5C	0.122165	0	0		ARSA	1.852	1.35514	1.07743
ARL6	1.4451	0.890947	0.723821		ARSB	0.443944	0.387458	0.22632
ARL6IP1	191.909	177.773	167.787		ARSG	0.0580464	0.0448226	0.0394085
ARL6IP4	123.754	107.258	124.457		ARSK	0.688282	0.584793	0.425445
ARL6IP5	14.5555	15.717	13.6584		ARV1	3.6403	3.12802	2.30743
ARL6IP6	6.01806	5.65869	5.27387		ARVCF	0.0882758	0.0915456	0.0918478
ARL8A	3.53699	5.38367	3.80754		AS3MT	0.0343914	0.0213659	2.24546e-05
ARL8B	9.19724	8.39996	8.13402		ASAH1	3.7726	3.18662	2.79276
ARMC1	17.0287	16.8883	14.7104		ASAP1	0.574139	0.575107	0.483977
ARMC10	9.56629	8.93158	7.17253		ASAP1-IT2	0.392248	0.409401	0.205376
ARMC10P1	24.2936	48.6755	50.266		ASAP2	0.514499	0.471926	0.404982
ARMC2	0.225802	0.268092	0.281036		ASAP3	0.0142245	0.0123721	0.0148955
ARMC5	3.70201	3.23927	3.89872		ASB1	2.69206	2.48273	2.2293
ARMC6	4.50044	4.52599	4.63765		ASB13	0.0804441	0.104952	0.0752136
ARMC7	2.03746	2.14594	2.28821		ASB14	0.431927	0.432641	0.621903
ARMC8	4.83142	3.82568	3.31725		ASB16	0.621773	0.694869	0.652117
ARMC9	0.188669	0.134514	0.142811		ASB16-AS1	1.50045	1.64516	0.949941
ARMCX3	17.9453	12.7445	12.0648		ASB3	0.247154	0.234011	0.18978
ARMCX4	0	0	0		ASB6	4.29869	3.49866	2.72901
ARMCX5	32.9507	25.2346	21.0162		ASB7	1.34309	1.14316	0.905927
ARMCX5-GPRASP2	0.492872	0.40187	0.348378		ASB8	3.70861	3.50341	2.54992
ARMCX5-GPRASP2	0.653417	7.56272e-09	1.0749e-14		ASCC1	0.812293	0.779085	0.651764
ARMCX6	17.1897	17.8189	15.0739		ASCC2	2.85664	3.05353	2.45368
ARMCX7P	5.21572	4.5613	4.50947		ASCC3	1.84147	1.58977	1.38415
ARMH1	0	0	0		ASDURF	0.723491	2.11027	0.302937
ARMH3	0.448497	0.517673	0.431081		ASF1A	20.1043	16.3847	12.0957
ARMH4	3.69617e-37	0.0073068	2.47541e-28		ASF1B	6.02778	5.37247	4.15445
ARMT1	15.1544	14.3575	10.4855		ASH1L	2.46859	2.22846	2.11606
ARNT	4.69292	4.63766	3.75119		ASH1L-AS1	1.44204	1.04703	1.69342
ARNTL	0.33921	0.591344	0.430375		ASH1L-IT1	3.28857	1.43016	1.43488
ARNTL2	2.89744	2.3706	2.06006		ASH2L	7.77165	6.81344	5.3441
ARPC1A	8.68853	8.43285	6.28566		ASIC1	0.0978091	0.069121	0.0640147
ARPC1B	20.1503	16.4183	14.3227		ASIC3	0.142738	0.12415	0.0934198
ARPC2	33.7578	30.6998	28.4691		ASIP	0.0106539	0.0111198	0.00557826
ARPC3	93.4713	85.5208	80.7623		ASL	0.328813	0.410657	0.345797
ARPC3P1	29.3341	27.7564	41.4711		ASMTL	0.728228	0.74583	0.514434
ARPC3P3	28.1256	21.9949	8.17523		ASMTL-AS1	0.50192	0.548784	0.722375
ARPC3P5	1.27579e-20	11.432	12.3991		ASNS	0.0102454	0.0700523	0.0418449
ARPC4	17.4724	16.1956	13.0369		ASNSD1	12.9927	10.9885	10.0985
ARPC4-TTLL3	0.0839316	9.18976e-05	0.287624		ASPDH	0.103093	0.179336	0.224911
ARPC5	44.8664	45.0294	43.6531		ASPHD2	0.738205	0.512214	0.50914
ARPC5L	11.9402	11.8773	11.8488		ASPM	64.3354	57.4116	48.3036
ARPIN-AP3S2	0.14869	0.150994	0.361686		ASPN	0.224137	0.136991	0.179734
ARPP19	133.527	118.667	103.59		ASPRV1	1.39169	0.475994	0.36044
ARPP21	4.06742	4.75181	4.5551		ASPSCR1	0.455231	0.525657	0.486297
ARRB1	7.11425	5.1019	5.12008		ASS1P1	2.44728	2.01656	1.57361
ARRB2	19.3414	19.4963	16.2453		ASTE1	3.1397	2.90543	1.96833
ARRDC1	2.54064	2.2534	2.40279		ASTN2	0.00224872	0.00195588	0.001682
ARRDC1-AS1	7.96218	8.53857	7.12269		ASXL1	4.91036	4.51904	3.85927
ARRDC2	2.39399	1.93311	2.30453		ASXL2	2.79833	2.6101	2.28632
ARRDC3	21.7595	22.3428	18.2421		ATAD1	3.9882	3.42099	2.61209
ARRDC3-AS1	0.00557172	0	0.00476756		ATAD2	18.4136	16.9812	14.962
ARRDC4	11.3314	7.72126	8.76855		ATAD2B	1.72133	1.61366	1.56913
ARSA	2.6259	1.81028	2.04265		ATAD3A	4.32778	4.64844	4.52665
ARSB	1.14594	0.762011	0.916945		ATAD3B	1.97321	1.71749	1.8352
ARSD	0	0	0		ATAD3C	0.141357	0.0082325	0.0163898
ARSG	0.148623	0.146648	0.230155		ATAD5	10.6914	9.44147	8.39404
ARSK	0.853909	1.09015	0.730666		ATAT1	0.446529	0.58257	0.500994
ARTN	0	0	0		ATE1	1.05052	0.94139	0.749969
ARV1	10.9442	12.2285	11.1969		ATE1-AS1	0.0606231	0.0436254	0.0562424
ARVCF	0.137855	0.348468	0.0707753		ATF1	2.22136	2.10094	2.04737
ASAH1	5.57561	5.7879	4.50372		ATF2	4.14947	3.35797	2.34842
ASAH2	0	0	0		ATF3	0.132191	0.164967	0.115357
ASAH2B	0	0	0		ATF4	152.889	147.143	118.48
ASAP1	0.578246	0.626435	0.650294		ATF4P3	1.42102	1.21315	1.52859
ASAP1-IT2	0.637052	0	0		ATF4P4	5.80712	3.7041	1.97586
ASAP2	0.780531	0.630267	0.712403		ATF5	36.6046	33.6346	25.1202
ASB1	5.17359	4.95756	3.64568		ATF6	0.702097	0.648055	0.440923
ASB12	0.201723	0	0		ATF6B	8.60699	8.83302	6.81621
ASB13	2.51968	1.88717	1.6769		ATF7	0.748343	0.730509	0.498276
ASB16-AS1	2.64641	1.82442	1.44102		ATF7IP	4.47501	4.06793	3.30845
ASB2	0	0	0		ATF7IP2	0.59798	0.529806	0.389159
ASB3	0.470149	0.40946	0.415815		ATG10	0.180666	0.181231	0.149852
ASB6	11.4576	8.78955	6.58474		ATG101	4.31091	5.52745	4.365
ASB7	2.39734	2.26416	1.93863		ATG10-AS1	0.737643	0.641584	1.07284
ASB8	4.68381	4.89242	3.94156		ATG12	16.6698	15.2001	12.6681
ASCC1	1.54917	1.55738	1.353		ATG12P1	19.0669	19.232	13.7471
ASCC2	4.89465	4.2997	4.43327		ATG13	2.35376	2.00464	1.36829
ASCC3	4.00798	3.529	3.42655		ATG14	0.831009	0.734886	0.53547
ASCL2	0	0	0		ATG16L1	1.1779	1.08925	0.995415
ASDURF	2.45726	2.5063	5.42277		ATG16L2	0.78244	1.00742	0.990132
ASF1A	41.5205	37.743	33.3166		ATG2A	1.45511	1.30842	1.11644
ASF1B	15.358	14.2792	11.0698		ATG2B	2.31952	2.14592	1.66061
ASGR1	0	0	0		ATG3	11.0744	10.2939	8.9157
ASGR2	0	0	0		ATG4A	0.667631	0.596085	0.509781
ASH1L	2.25393	1.91828	1.97235		ATG4B	2.0218	1.89087	1.26348
ASH1L-AS1	1.3598	2.29152	0.581773		ATG4C	1.28428	0.902482	0.821751
ASH2L	20.8577	19.2981	18.1057		ATG4D	2.04366	1.55023	1.49318
ASIC1	0.34749	0.585585	0.339814		ATG5	0.495548	0.407291	0.297551
ASIC3	0.289777	0.488328	0		ATG7	0.119385	0.0971567	0.0823061
ASL	0.342326	0.403818	0.527253		ATG9A	2.33023	2.50606	1.96361
ASMTL	1.5846	1.70127	1.3559		ATG9B	0.0892526	0.117818	0.0968373
ASMTL-AS1	0.211069	0	0.0903029		ATIC	7.83211	7.09439	5.25381
ASNS	0.000255145	0	0.0939541		ATL1	0.354541	0.356689	0.280869
ASNSD1	48.0084	39.4136	36.5144		ATL2	3.13186	2.49286	1.82201
ASPH	0	0	0		ATL3	27.3749	24.3702	18.9568
ASPHD1	0.0663855	0	0.113608		ATM	3.07787	2.61293	2.30591
ASPHD2	1.39601	1.17627	0.772928		ATMIN	16.2903	13.6472	10.149
ASPM	59.3642	53.6432	53.6274		ATN1	9.87629	9.94033	9.03886
ASPSCR1	0.924181	1.10093	1.17256		ATOX1	0.606383	0.4999	0.450936
ASRGL1	0	0	0		ATP10D	1.31423	1.23684	0.943935
ASS1	0	0	0		ATP11A	1.07012	0.951855	0.800534
ASS1P2	0	0.891409	0.905245		ATP11A-AS1	0.12064	0.0599599	0.105276
ASTE1	9.58061	5.14428	5.06339		ATP11B	3.68325	3.62586	2.53882
ASTL	0	0	0		ATP11C	1.25394	1.10394	0.819259
ASTN2	0.00913039	0.00219806	0.00446435		ATP13A1	4.5698	4.57466	3.37085
ASXL1	7.42861	7.55154	5.98736		ATP13A2	1.75836	1.50237	0.965463
ASXL2	3.99595	3.73605	3.35037		ATP13A3	5.67444	4.87607	3.6499
ATAD1	7.40156	6.92819	5.92636		ATP13A4	0.0127154	0.00723983	0.0106744
ATAD2	25.1796	23.9052	20.8686		ATP1A1	13.5802	11.9299	9.44431
ATAD2B	2.15328	1.82656	1.69362		ATP1A1-AS1	0.753718	0.639078	0.601522
ATAD3A	9.70185	10.2995	10.1067		ATP1A3	1.96234	2.1774	1.81683
ATAD3B	1.93639	1.97299	1.50033		ATP1B1	1.32102	1.38841	0.913157
ATAD3C	0.067491	0	0.055831		ATP1B1P1	3.13438	1.81747	2.73521
ATAD5	10.6296	10.8842	10.1869		ATP1B2	0.0285949	0.0746136	0.0873366
ATAT1	0.971264	0.43647	0.49865		ATP1B3	6.51216	5.47174	4.57438
ATE1	2.27717	1.83757	1.77779		ATP1B3-AS1	1.65539	1.25984	1.80571
ATE1-AS1	0	0	0.0468045		ATP1B3P1	0.970347	0.506391	0.33904
ATF1	3.73835	3.11196	3.14099		ATP23	0.510003	0.527087	0.421492
ATF2	8.80217	7.25791	6.19587		ATP2A1	0.10393	0.0980637	0.108551
ATF3	0.233362	0.235955	0.0798726		ATP2A1-AS1	5.28899	3.81791	2.40188
ATF4	170.393	138.276	132.258		ATP2A2	7.44124	6.53328	5.04264
ATF4P3	11.1472	8.80456	19.864		ATP2A3	15.2953	14.4983	11.0424
ATF4P4	41.3527	42.035	35.754		ATP2B1	1.6464	1.55299	1.08007
ATF5	9.88807	11.2477	7.1918		ATP2B1-AS1	0.602658	0.733259	0.425296
ATF6	1.6351	1.64089	1.49867		ATP2B4	11.6061	10.3048	8.17676
ATF6B	9.46237	8.30863	6.73302		ATP2C1	1.17069	0.946762	0.718972
ATF7	1.32054	1.32418	1.10193		ATP5F1A	14.116	12.1051	9.29361
ATF7IP	10.4069	8.67349	8.41286		ATP5F1B	88.5191	79.6702	56.791
ATF7IP2	1.07818	0.950074	0.929608		ATP5F1C	23.5892	21.0316	14.3147
ATF7-NPFF	3.76135e-19	1.59947e-07	9.66875e-07		ATP5F1D	12.9844	11.2486	9.11885
ATG10	0.360777	0.350481	0.239702		ATP5F1E	40.2424	40.6851	43.864
ATG101	10.0372	8.45725	7.64915		ATP5IF1	10.9782	12.3592	13.031
ATG12	19.4468	17.6663	16.2357		ATP5MC1	7.64091	6.73509	6.13082
ATG12P1	3.14744	7.80568	2.64228		ATP5MC2	2.27504	2.06866	1.41274
ATG13	4.81028	4.62398	3.63292		ATP5MC2P4	14.0363	13.5283	16.2213
ATG14	1.08201	0.863709	0.925844		ATP5MC3	20.2196	17.2561	15.0182
ATG16L1	0.906652	1.10771	1.24127		ATP5ME	14.1691	14.0169	16.0779
ATG16L2	1.5472	1.30366	1.02129		ATP5MF	2.68954	3.54849	4.87387
ATG2A	3.31084	2.6454	2.39339		ATP5MF-PTCD1	0.307049	0.279622	0.118236
ATG2B	4.15155	3.27782	3.36817		ATP5MG	11.5495	12.4712	11.0795
ATG3	29.6995	30.4502	28.1867		ATP5MGL	0.79801	0.867223	0.348035
ATG4A	0.841978	0.640231	0.562308		ATP5MGP2	74.067	79.3172	49.2236
ATG4B	5.4374	5.65252	4.13903		ATP5MJ	5.76231	5.87904	6.70754
ATG4C	2.33699	2.47816	1.9861		ATP5MK	8.55009	7.24711	7.27379
ATG4D	5.29822	3.2051	3.71983		ATP5PB	22.3444	19.223	14.6214
ATG5	1.13986	1.03821	0.912167		ATP5PD	15.633	15.3026	13.2136
ATG7	0.167764	0.175741	0.112513		ATP5PDP4	2.68347	4.97411	3.23073
ATG9A	5.63196	5.23033	5.28973		ATP5PF	10.8423	13.196	14.0726
ATG9B	0	0	0		ATP5PO	14.6349	12.9413	11.2143
ATIC	32.4679	33.9875	29.2454		ATP6AP1	5.55759	5.43149	3.66823
ATL1	0.994203	0.79475	0.785272		ATP6AP1L	1.85981	1.70657	1.50658
ATL2	5.83796	5.54699	4.84924		ATP6AP2	4.98686	4.35258	3.45609
ATL3	46.3608	38.5846	32.8421		ATP6V0A1	0.0149984	0.00652264	0.00436279
ATM	4.9873	4.52322	4.50247		ATP6V0A2	5.24505	4.65587	3.80921
ATMIN	48.2285	43.1919	37.1135		ATP6V0B	7.32028	5.9304	4.23434
ATN1	9.70807	10.1944	9.60875		ATP6V0C	12.1582	13.6997	11.4847
ATOX1	0.942012	0.721576	0.659498		ATP6V0D1	0.734499	0.674163	0.592646
ATP10A	0	0	0		ATP6V0D1-DT	0.297163	0.202277	0.293143
ATP10D	2.27177	2.18619	2.33266		ATP6V0E1	1.39675	1.29799	0.89868
ATP11A	1.51615	1.42682	1.34787		ATP6V0E2	2.00373	1.86559	1.34525
ATP11B	9.37114	8.0407	7.58657		ATP6V0E2-AS1	0.291822	0.50592	0.242809
ATP11C	2.07436	2.0516	1.90645		ATP6V1A	3.68971	3.17766	2.56842
ATP13A1	10.7127	7.55153	7.06962		ATP6V1B1-AS1	0.393878	0.223612	0.271184
ATP13A2	3.18843	3.06434	2.17407		ATP6V1B2	6.29985	5.14523	3.75005
ATP13A3	12.6285	11.3812	8.97788		ATP6V1C1	2.84098	2.48434	1.77581
ATP1A1	35.8278	37.9012	28.6245		ATP6V1C2	0.0454928	0.0246573	0.0564586
ATP1A1-AS1	3.83342	2.59418	2.35034		ATP6V1D	2.99343	2.67302	1.82728
ATP1A3	0.181382	0.44784	1.72445		ATP6V1E1	2.77589	2.29647	1.95452
ATP1B1	1.14899	1.33118	1.31087		ATP6V1E1P1	1.16983	1.01749	2.71431
ATP1B3	12.4444	10.7234	9.00166		ATP6V1E1P3	4.90925	6.54069	6.50667
ATP1B3P1	17.3354	14.6067	5.39398		ATP6V1E2	0.178305	0.189846	0.179742
ATP23	0.730853	0.882664	0.521142		ATP6V1F	28.13	27.9821	21.8438
ATP2A1	0.0496452	0	0		ATP6V1G1	6.01221	6.26772	6.41244
ATP2A1-AS1	16.1061	11.3091	5.74229		ATP6V1G2	0.924143	0.665793	0.785313
ATP2A2	24.134	21.8387	18.9194		ATP6V1G2-DDX39B	2.86167	2.2017	1.95586
ATP2A3	33.3063	34.3479	26.3722		ATP6V1H	0.587461	0.56292	0.489837
ATP2B1	3.52136	3.20084	3.22313		ATP7A	0.869346	0.652218	0.529587
ATP2B1-AS1	0.356237	0.600326	0.304822		ATP7B	0.0214548	0.0220537	0.0136163
ATP2B2	0	0	0		ATP8A1	0.197296	0.166588	0.148133
ATP2B4	14.6599	13.4025	12.8744		ATP8A2P2	0.131337	0.425373	0.498993
ATP2C1	2.35221	2.00164	1.70614		ATP8B1	0.0565078	0.0306211	0.061234
ATP5F1A	63.7606	52.004	49.1797		ATP8B2	3.67735	3.06945	2.42699
ATP5F1AP3	1.7199	2.1761	1.48227		ATP8B3	0.828255	1.03242	0.616891
ATP5F1B	441.332	397.13	374.805		ATP8B5P	0.0235463	0.0102017	0.0151351
ATP5F1C	92.2911	92.2294	93.2671		ATP9B	0.363519	0.308107	0.280327
ATP5F1D	60.0718	51.678	46.0099		ATPAF1	4.9545	4.91914	4.10044
ATP5F1E	40.6742	39.6665	46.5662		ATPAF2	0.579634	0.548903	0.40913
ATP5IF1	21.4484	20.1925	22.8641		ATPSCKMT	2.36473	1.83519	1.15149
ATP5MC1	23.3202	21.053	24.2304		ATR	2.31445	1.96922	1.77078
ATP5MC2	6.77577	6.1972	6.59071		ATRAID	8.73166	8.68701	7.11751
ATP5MC2P4	3.0806	10.3828	5.27197		ATRIP	3.05174	2.64443	2.30471
ATP5MC3	86.1304	78.1709	72.8872		ATRN	0.298136	0.278548	0.204583
ATP5ME	56.6702	42.5722	46.7383		ATRNL1	0.00164536	0.00242946	0.00194535
ATP5MF	2.84893	2.70368	1.68767		ATRX	3.69335	3.55029	3.2418
ATP5MF-PTCD1	0.773331	0.611656	0.53539		ATXN1	0.0110268	0.0107897	0.00756188
ATP5MG	14.4038	14.7652	17.1488		ATXN10	2.14558	1.97942	1.53349
ATP5MJ	10.5244	8.4585	7.61998		ATXN1L	1.52094	1.41396	1.2376
ATP5MK	32.6415	32.9164	37.1415		ATXN2	1.98919	1.7612	1.61836
ATP5PB	52.3264	49.8323	46.8956		ATXN2L	24.0596	24.6134	21.5572
ATP5PD	21.3439	26.0369	23.7141		ATXN3	5.02413	4.55947	3.23172
ATP5PF	11.8108	12.5676	13.5134		ATXN7	1.31727	1.20894	1.07123
ATP5PO	24.8053	20.5481	27.0465		ATXN7L1	0.31945	0.312007	0.280813
ATP6AP1	15.4265	13.9662	9.9702		ATXN7L2	1.40094	1.4414	0.983984
ATP6AP1L	1.29968	1.22692	0.998829		ATXN7L3	11.0436	10.2238	7.1118
ATP6AP2	8.38177	8.84787	5.43947		ATXN7L3-AS1	0.0180198	0.0470195	0.0235874
ATP6V0A1	0.0405985	0.034208	0.0521085		ATXN7L3B	30.8468	26.6379	19.0816
ATP6V0A2	8.04026	7.30429	6.20753		AUH	0.103277	0.101992	0.0854307
ATP6V0B	18.0032	11.7348	8.71972		AUNIP	1.31973	1.0052	1.06583
ATP6V0C	7.01763	8.63898	9.36207		AUP1	24.4928	24.5054	19.9011
ATP6V0D1	1.55857	1.36375	1.30798		AURKA	14.093	11.9313	9.70512
ATP6V0D1-DT	0.367214	0.353614	0.403991		AURKAIP1	22.3749	24.9542	24.7217
ATP6V0E1	1.77772	1.60338	1.3926		AURKAP1	2.88722	2.99383	4.21592
ATP6V0E2	9.22307	7.71152	5.64575		AURKB	36.4658	37.3378	26.301
ATP6V0E2-AS1	1.40266	0.506517	0.257189		AURKC	0.167823	0.204356	0.14645
ATP6V1A	10.546	10.1099	9.84118		AUTS2	0.296077	0.27897	0.235919
ATP6V1B1-AS1	0.761762	0.80232	0.325909		AVEN	0.0721641	0.0871047	0.0796813
ATP6V1B2	15.031	13.3686	11.5454		AVIL	0.158012	0.138507	0.181051
ATP6V1C1	7.46612	7.84266	6.70798		AVL9	1.96802	1.6976	1.36427
ATP6V1C2	0	0	0		AVPI1	0.113599	0.0423454	0.198264
ATP6V1D	3.69139	3.67286	4.16669		AVPR2	0.96231	0.896779	1.01971
ATP6V1E1	4.80592	4.8236	4.44406		AXDND1	0.0033718	0.00366589	0.000735598
ATP6V1E1P1	11.3996	9.60522	3.25144		AXIN1	1.2325	1.28215	1.16711
ATP6V1E1P3	4.17372	5.27513	3.62142		AXIN2	0.308202	0.335084	0.315178
ATP6V1E2	0.374466	0.252418	0.384504		AXL	0.0149803	0.00651477	0.022877
ATP6V1F	43.6762	37.53	50.3233		AZI2	6.09772	5.37816	4.57433
ATP6V1FNB	0	0.19066	0.193619		AZIN1	11.2077	10.3516	8.41989
ATP6V1G1	16.9667	16.5328	15.8018		AZIN2	0.0488642	0.0621166	0.0492014
ATP6V1G2	1.64274e-27	0.78656	0.277891		B2M	249.716	215.764	178.078
ATP6V1G2-DDX39B	10.9959	4.92336	5.66871		B3GALNT1P1	0.797153	0.520008	0.434771
ATP6V1H	0.869199	0.885671	0.804287		B3GALNT2	1.68637	1.49275	1.12269
ATP7A	0.999972	0.920586	0.863571		B3GALT2	0.581386	0.421864	0.581978
ATP7B	0.0475157	0.0533819	0.0677631		B3GALT4	1.59124	1.36605	1.35253
ATP8A1	0.343317	0.385703	0.293767		B3GALT6	28.0036	27.4694	23.8425
ATP8A2	0	0.00333454	0.00169315		B3GALT9	1.01755	0.816315	0.608536
ATP8B2	6.92598	6.85071	6.26993		B3GAT2	0.0674757	0.0651487	0.0324716
ATP8B3	1.37088	0.866321	0.806454		B3GAT3	1.78357	2.78821	1.25681
ATP8B4	0	0	0		B3GLCT	1.33436	1.10194	0.830233
ATP9A	0	0	0		B3GNT2	4.49871	3.93709	3.15326
ATP9B	0.314039	0.324585	0.30096		B3GNT4	0.69742	0.70367	0.66194
ATPAF1	6.85761	6.3878	6.16394		B3GNT5	0.0287353	0.0256323	0.0349733
ATPAF2	0.502459	0.564492	0.42994		B3GNT8	0.141754	0.20549	0.151513
ATPSCKMT	6.36556	6.88326	5.49222		B3GNT9	1.01809	0.979396	1.12422
ATR	4.67765	4.0506	3.7465		B3GNTL1	0.560852	0.546628	0.427023
ATRAID	20.8443	19.0445	18.9103		B4GALT1	0.876289	0.805978	0.55594
ATRIP	4.31478	3.79962	3.81844		B4GALT2	0.651501	0.600659	0.477566
ATRN	1.31468	1.27118	1.34009		B4GALT3	3.68478	3.04077	2.9068
ATRX	3.4306	2.98747	3.14403		B4GALT4	1.03076	1.20397	0.818581
ATXN1	0.145509	0.12732	0.0790146		B4GALT5	1.06307	0.892102	0.694048
ATXN10	4.1907	4.09034	3.72621		B4GALT6	4.25191	3.6721	3.05888
ATXN1-AS1	0.854029	0	0		B4GALT7	1.31227	1.10061	0.695267
ATXN1L	3.55334	3.33458	3.05491		B4GAT1	11.5119	10.9342	7.88879
ATXN2	2.07093	1.94039	2.04848		B9D1	0.0479417	0.0383225	0.0348503
ATXN2L	32.076	29.8599	25.8915		B9D2	0.702763	0.682321	0.413597
ATXN3	7.49746	6.21202	5.9164		BAALC	0.00479681	0.0030936	0.0108633
ATXN7	1.50311	1.72494	1.87796		BAALC-AS1	0.0512129	0.0451408	0.0514115
ATXN7L1	0.295109	0.244646	0.219934		BAAT	0.015311	0.00887807	0.0222685
ATXN7L2	2.91346	2.45486	1.06841		BABAM1	13.0001	11.7566	8.94929
ATXN7L3	22.1118	18.3689	13.8573		BABAM2	0.060331	0.0576781	0.0473829
ATXN7L3B	116.508	97.3079	93.2798		BACE1	0.721	0.714126	0.558407
AUH	0.192195	0.22083	0.171931		BACE1-AS	4.20704	3.83147	3.11428
AUNIP	2.77134	2.88914	2.04976		BACE2	0.0791586	0.0579791	0.0521112
AUP1	54.395	53.8799	32.6876		BACH1	0.622101	0.505544	0.37253
AURKA	20.8416	17.1593	18.5885		BACH1-AS1	0	0.0876964	0.153975
AURKAIP1	60.8096	52.4725	55.7945		BACH1-IT1	0.279501	0.18908	0.230355
AURKAP1	1.8987	7.51405	9.32267		BACH1-IT2	0.545484	0.301922	0.173097
AURKB	85.1104	80.8169	81.8827		BACH2	0.0559234	0.0438584	0.0379151
AURKC	0	0.918637	0		BAD	1.72768	1.65233	1.65854
AUTS2	0.417856	0.352084	0.40201		BAG1	6.34457	6.83032	6.42508
AVEN	0.149493	0.120923	0.13815		BAG2	3.50101	2.57726	2.45429
AVIL	0	0	0.0519065		BAG3	2.00068	2.26428	1.74063
AVL9	4.3128	4.12469	3.55981		BAG4	7.31487	6.31812	4.6336
AVPI1	0.263568	0.22208	0		BAG5	22.2588	21.2418	19.3332
AXIN1	1.92243	1.66992	1.67888		BAG6	15.2569	14.2082	9.43801
AXIN2	1.17261	1.08736	0.921121		BAGE2	0.0134653	0.0103941	0.00998328
AXL	0	0	0		BAHCC1	0.218058	0.222701	0.172631
AZI2	10.9442	9.76588	9.72236		BAHD1	1.30537	1.31516	1.03856
AZIN1	26.3146	22.2852	20.9972		BAIAP2	0.0635311	0.0387228	0.0469646
AZIN2	0.122093	0.0771563	0.0783539		BAIAP2-DT	2.32681	2.3852	1.81293
AZU1	0	0.314994	0		BAIAP2L1	0.0174703	0.00697483	0.0107412
B2M	455.706	427.05	364.226		BAIAP2L2	0.0181305	0.0367955	0.0158216
B3GALNT1	0	0	0		BAK1	3.68738	3.19786	1.91724
B3GALNT2	3.66038	4.34075	3.03541		BAK1P1	2.18263	1.12646	0.249469
B3GALT4	0.503445	0.848399	1.00516		BANF1	82.8935	78.1558	75.6655
B3GALT6	54.4295	37.3114	47.3632		BANP	0.925611	0.820134	0.789267
B3GALT9	3.61508	3.04604	2.79872		BAP1	17.6129	16.7204	12.2032
B3GAT3	5.47044	4.28335	4.6809		BARD1	10.1167	8.79427	6.64939
B3GLCT	1.88745	1.99412	1.7824		BATF	0.0973946	0.118596	0.0793251
B3GNT2	11.2127	10.8954	8.70463		BATF3	1.24626	1.1872	0.973611
B3GNT5	0	0	0		BAX	2.09886	2.24224	2.28946
B3GNT7	0	0	0		BAZ1A	5.52497	5.53202	5.25428
B3GNT8	0	0	0		BAZ1B	23.2888	22.6278	20.5784
B3GNT9	0.446927	1.88289	1.91211		BAZ2A	6.69102	6.85937	5.66621
B3GNTL1	0.519165	0.457329	0.424042		BAZ2B	0.541573	0.517858	0.457097
B4GALNT1	0.526438	0.554467	0.112615		BBC3	0.84034	0.812119	0.68676
B4GALNT3	0.0374773	0.010526	0.0106894		BBIP1	1.80862	1.98284	1.89335
B4GALT1	2.61736	3.01515	2.58954		BBOF1	0.729803	0.650313	0.623167
B4GALT1-AS1	0	0	0		BBS1	0.812435	0.654412	0.605522
B4GALT2	0.423243	0	0.0905393		BBS10	13.3786	11.4255	9.06475
B4GALT3	10.6866	5.89382	8.64543		BBS12	0.872084	0.78116	0.579285
B4GALT4	1.50577	1.41802	0.98528		BBS2	0.556638	0.530058	0.441164
B4GALT5	2.07825	1.77806	1.64151		BBS4	0.679404	0.633328	0.412092
B4GALT6	9.46108	7.21758	7.24251		BBS5	0.130558	0.210766	0.135502
B4GALT7	1.26861	1.28271	0.651307		BBS7	1.46701	1.59421	1.08439
B4GAT1	26.3818	17.8799	22.0834		BBS9	0.0749306	0.0644507	0.0510787
B9D1	0.0589643	0	0.0504541		BBX	1.83637	1.67076	1.43184
B9D2	0.663583	1.78922	1.02206		BCAN	0.00878195	0.0574829	0.0383178
BAALC-AS1	0.160198	0.0899876	0.144692		BCAP29	3.62841	3.358	3.19657
BAAT	0	0	0.0709257		BCAP31	9.28531	7.62164	4.6724
BABAM1	35.6243	34.653	25.9342		BCAR3	0.00669904	0.00776888	0.00779453
BABAM2	0.181559	0.106843	0.123297		BCAS2	11.5179	11.0483	8.50053
BACE1	0.0416995	0.0702715	0.0356811		BCAS2P2	14.3741	11.5794	9.4574
BACE1-AS	7.83541	7.66691	7.13709		BCAS3	0.0721614	0.0681029	0.0485562
BACE2	0.21427	0.285067	0.135096		BCAS4	0.0556089	0.0518282	0.0427138
BACH1	0.882954	0.856314	0.661711		BCAT1	3.32119	3.00802	2.27439
BACH1-IT1	0.126094	0.106246	0.107895		BCAT2	1.31155	0.899266	0.902734
BACH1-IT2	0.402693	1.01792	0.689147		BCCIP	9.16929	8.89188	7.07077
BACH2	0.108292	0.100077	0.0567933		BCDIN3D	1.68671	1.90764	1.87064
BAD	2.78342	2.78503	2.38169		BCDIN3D-AS1	0.315734	0.458355	0.199257
BAG1	23.2727	21.7381	22.0754		BCHE	0.375135	0.345602	0.260596
BAG2	6.72496	6.60044	4.93231		BCKDHA	0.866252	0.764156	0.736226
BAG3	4.6978	4.61806	4.85723		BCKDHB	0.29722	0.301889	0.23964
BAG4	16.2572	17.2562	14.4227		BCKDK	3.52745	2.7364	2.26707
BAG5	64.9783	60.9922	50.8914		BCL10	7.13142	5.9849	4.89205
BAG6	39.824	39.6926	31.0005		BCL11A	3.64347	3.02769	2.99351
BAHCC1	0.784973	0.830611	0.562336		BCL11B	16.9915	15.3865	13.0904
BAHD1	3.3576	3.36432	2.13534		BCL2	2.61042	2.22891	1.82434
BAIAP2	0.0157187	0.0529779	0.201751		BCL2L1	6.34851	5.74973	4.36329
BAIAP2-DT	7.42301	7.58131	6.73661		BCL2L11	3.55025	3.33153	2.55361
BAIAP2L1	0	0	0		BCL2L12	1.64673	1.72994	1.74938
BAIAP2L2	0.0490765	0	0		BCL2L13	1.66671	1.6453	1.36312
BAIAP3	0	0	0		BCL2L15	0.236791	0.334678	0.193721
BAK1	16.5157	9.85071	10.1465		BCL2L1-AS1	0.176977	0.104129	0.131727
BAK1P1	2.2609	2.47967e-35	0		BCL2L2	0.77194	0.746652	0.751376
BAMBI	0	0	0		BCL2L2-PABPN1	0.0503246	0.136251	0.0572275
BANF1	203.258	161.03	172.192		BCL6	1.80604	1.69104	1.61069
BANK1	0.00194996	0	0		BCL7A	4.46879	4.14008	3.67242
BANP	0.573041	0.694928	0.58781		BCL7B	7.07225	6.89175	5.08324
BAP1	38.5238	33.55	30.0118		BCL7C	0.451653	0.452219	0.339139
BARD1	10.2538	9.48297	7.65408		BCL9	0.658293	0.588903	0.376682
BARX1	0	0	0		BCL9L	3.04553	2.86133	2.16655
BASP1	0	0	0		BCLAF1	31.8111	30.1438	26.5491
BASP1-AS1	0	0	0		BCLAF1P1	1.7311	1.54491	1.41611
BATF	0.0527264	0.266562	0.13535		BCLAF1P2	14.4461	19.2497	14.4323
BATF3	1.1566	1.21818	0.989673		BCLAF3	1.6477	1.58996	1.25632
BAX	6.29883	5.61955	5.70677		BCO2	0.0583037	0.0563457	0.0621849
BAZ1A	7.75786	6.0489	6.70125		BCOR	3.84223	3.77336	3.23842
BAZ1B	32.9121	31.8711	30.2573		BCORL1	0.449228	0.448346	0.431761
BAZ2A	11.8647	9.97069	10.8775		BCORP1	0.352445	0.299102	0.252773
BAZ2B	0.821851	0.728147	0.755871		BCR	1.28902	1.18662	0.852694
BBC3	0	0	0.278053		BCRP2	0.400479	0.25162	0.239655
BBIP1	2.84405	2.66264	2.21726		BCS1L	3.72755	3.28006	3.14184
BBOF1	0.753721	0.772395	0.714661		BDH1	1.25126	1.1821	1.11598
BBS1	1.36578	1.11927	1.7077		BDH2	4.23122	4.20935	2.98354
BBS10	29.54	33.7401	29.4893		BDNF-AS	0.0516114	0.0368502	0.0405372
BBS12	1.47978	1.15779	1.17576		BDP1	6.21021	6.0007	6.15193
BBS2	0.945379	0.922873	0.925243		BECN1	8.65653	9.1423	7.47442
BBS4	0.865917	0.792155	0.84679		BEGAIN	0.215539	0.21504	0.193393
BBS5	1.23786	1.12325	1.2629		BEND3	0.652088	0.671794	0.475124
BBS7	3.1394	3.04675	3.02209		BEND3P3	2.10738	1.5483	1.87328
BBS9	0.0994463	0.085213	0.0504791		BEND5	0.454302	0.33629	0.267109
BBX	3.60695	3.41719	2.95969		BEST1	0.0763586	0.099269	0.0668553
BCAN-AS1	0	0	0.687222		BET1	1.31305	1.06881	1.16922
BCAP29	4.94676	5.13923	5.31968		BET1L	0.759581	0.74821	0.531093
BCAP31	21.4344	18.559	17.0453		BET1P1	2.45729	1.93011	0.635495
BCAR1	0	0	0		BEX3	40.7778	43.7669	42.8118
BCAR3	0.00906663	0.0114592	0.0193952		BEX4	37.5423	35.5689	32.6961
BCAS2	17.2845	16.3455	15.1025		BFAR	2.59364	2.17954	1.66973
BCAS2P2	1.30166	3.29032	3.37032		BHLHB9	0.173744	0.17649	0.118359
BCAS3	0.0705358	0.0502894	0.0495224		BHLHB9P1	8.00998	5.28812	6.98989
BCAS4	0	0	0		BHLHE23	2.72975	3.87381	3.51047
BCAT1	24.6157	21.776	19.7339		BHLHE40	9.11411	9.13351	6.78603
BCAT2	3.40317	2.5944	3.536		BHLHE40-AS1	0.0385897	0.0348199	0.0310608
BCCIP	18.925	19.5258	17.7359		BICD1	0.786296	0.730965	0.626384
BCDIN3D	7.1433	4.16693	5.01524		BICD2	3.01253	3.19819	2.81868
BCDIN3D-AS1	0.293369	0.411984	0.0836758		BICDL1	0.169038	0.16292	0.142195
BCHE	0.0601242	0.135094	0.0342977		BICRA	0.221195	0.189475	0.162317
BCKDHA	1.52176	1.44314	2.36113		BICRAL	0.986619	0.908284	0.758068
BCKDHB	0.658741	0.696088	0.526704		BID	4.36824	4.02448	3.31918
BCKDK	14.5159	8.48018	10.7648		BIN2	1.58479	1.80373	1.77818
BCL10	16.9225	17.6728	9.99329		BIN3	0.41808	0.533746	0.548385
BCL11A	6.12399	6.07249	5.26141		BIRC2	11.137	8.40042	5.89131
BCL11B	20.38	19.799	16.5349		BIRC3	3.18394	2.5944	2.01266
BCL2	5.03647	4.95282	4.53461		BIRC5	31.6964	29.8438	26.5792
BCL2A1	0	0	0		BIRC6	3.41631	2.86817	2.48483
BCL2L1	11.5177	10.2541	8.83266		BIRC6-AS1	0.323679	0.422292	0.211843
BCL2L11	5.30009	5.0657	4.24182		BIRC6-AS2	0.036323	0.0631858	0.0237729
BCL2L12	4.57088	4.47259	4.54201		BISPR	0.325148	0.429339	0.210174
BCL2L13	3.8181	4.62793	3.67949		BIVM	2.49533	1.99383	1.68108
BCL2L15	0.240359	0.101263	0		BIVM-ERCC5	0.0200384	0.0302994	0.0192979
BCL2L2	1.35742	1.11964	1.69544		BLCAP	1.79281	1.54762	1.15671
BCL2L2-PABPN1	0.425027	0.0974743	0.183649		BLK	0.606928	0.522542	0.458063
BCL3	0	0	0		BLM	2.4913	2.14214	1.54227
BCL6	1.00962	0.940246	0.591091		BLMH	3.36799	3.05264	2.06401
BCL7A	7.68001	6.59901	6.23389		BLOC1S1	9.31981	11.2238	15.9762
BCL7B	12.2502	11.0373	8.82163		BLOC1S2	4.58934	4.10545	3.45498
BCL7C	0.895592	0.916325	0.620365		BLOC1S3	0.392585	0.392317	0.382679
BCL9	1.37455	1.09385	0.954003		BLOC1S4	7.05288	5.76264	3.45035
BCL9L	5.40922	4.65982	4.97393		BLOC1S5	4.50105	4.38958	4.21264
BCLAF1	88.4499	75.3991	71.5333		BLOC1S6	8.5836	7.80016	5.53862
BCLAF1P1	8.87174	10.1777	3.98055		BLVRA	0.530415	0.498365	0.554295
BCLAF1P2	88.186	97.1233	80.3534		BLVRB	0.548807	0.46964	0.494364
BCLAF3	1.93721	1.44248	1.25285		BLZF1	2.64334	2.27486	1.99039
BCO2	0	0.0221629	0.0675207		BMF	1.61584	1.45821	1.11878
BCOR	6.13875	5.77948	5.6174		BMI1	47.363	39.3957	28.4274
BCORL1	0.890979	1.13318	0.791155		BMP1	0.146169	0.146844	0.119547
BCORP1	0.67206	0.2929	0.40651		BMP10	1.4127	1.13624	1.11349
BCR	1.8723	1.55171	1.35768		BMP2K	1.32251	1.16086	0.922833
BCRP2	0.390814	0.571644	0.135456		BMP2KL	0.27203	0.476153	1.03042
BCS1L	11.6115	11.1815	7.33345		BMP8A	0.0666761	0.0507441	0.0570209
BCYRN1	0	5.45096	5.53557		BMP8B	0.0251438	0.00874777	0.0277345
BDH1	3.40054	2.48781	3.34533		BMPR1A	0.309969	0.288335	0.190581
BDH2	8.36304	8.32828	6.44576		BMPR1AP1	0.905599	0.636977	0.276145
BDH2P1	23.0323	20.2471	14.08		BMPR1B	1.01528	0.843273	0.603727
BDNF	0	0	0		BMPR2	1.33674	1.0881	0.926079
BDNF-AS	0.0405592	0.0227833	0.0231369		BMS1	5.24473	6.23905	6.27705
BDP1	3.5527	3.27534	3.47423		BMS1P1	0.644759	0.558045	0.650781
BECN1	16.9415	13.8992	13.1612		BMS1P10	0.000219069	0.0168368	7.6796e-43
BEGAIN	0	0.0650641	0		BMS1P15	0.264076	0.000373692	1.66783e-12
BEND3	2.8533	2.55578	2.44148		BMS1P2	0.238855	0.0584207	0.198548
BEND3P2	0	0	0		BMS1P22	0.144657	0.0921566	0.0414514
BEND4	0	0	0		BMS1P23	8.93953e-35	0.112484	0.024863
BEND5	0.941917	0.59524	0.559703		BMS1P4	1.21982	1.06101	1.21759
BEND6	0.125373	0.060365	0.091953		BMS1P4	0.22242	0.200655	0.149038
BEND7	0	0	0		BMS1P4-AGAP5	0.121384	0.232811	0.168105
BEST1	0.0837283	0.211647	0.35822		BMS1P7	0.965257	0.491093	1.24491
BEST4	0	0	0		BMS1P8	0.0660986	0.0731798	0.0973926
BET1	2.85996	2.46217	2.63339		BMT2	0.802351	0.740382	0.617295
BET1L	1.72831	2.08991	2.31783		BNC2	0.0207219	0.0180234	0.0147677
BEX1	0	0	0		BNIP1	1.99703	1.68139	1.15019
BEX3	71.637	55.4335	51.29		BNIP2	12.835	12.2306	9.3474
BEX4	47.7861	42.8126	32.6078		BNIP3	0.542743	0.623482	0.741713
BFAR	5.34562	5.64524	5.00101		BNIP3L	2.54509	1.96905	1.40739
BFSP1	0	0	0		BNIP3P10	3.31364	1.92142	2.89164
BGLAP	2.28193	1.6326e-17	1.45147e-20		BNIP3P11	0.377562	0.246295	0.345952
BHLHB9	0.44409	0.497759	0.438087		BNIP3P16	0.310738	0.540545	0.135583
BHLHB9P1	0	1.98097	8.04686		BNIP3P17	13.8753	9.70357	5.9891
BHLHE23	9.33348	14.7456	3.9932		BNIP3P24	0.572104	2.48801	1.74736
BHLHE40	38.4618	40.5558	33.0987		BNIP3P25	1.71017	0.991644	1.24365
BHLHE40-AS1	0	0.0130396	0.0264841		BNIP3P26	0.575202	0.500297	1.50585
BICD1	1.2761	0.996459	1.11992		BNIP3P27	1.03866	2.16817	0.72511
BICD2	7.83992	7.05442	6.21149		BNIP3P37	0.530514	0.461428	1.23454
BICDL1	0.0865652	0.125039	0.12698		BNIP3P40	1.14627	1.24624	1.00029
BICRA	0.217724	0.194919	0.104794		BNIP3P41	2.01293	1.34677	2.29706
BICRAL	2.41527	2.11578	2.03937		BNIP3P42	1.12008	1.46132	1.22179
BID	10.4762	10.0345	10.49		BNIPL	0.0559056	0.036469	0.121965
BIK	0	0	0		BOD1	5.35848	5.15587	4.90987
BIN1	0	0	0		BOD1L1	13.608	14.7728	15.0666
BIN2	2.60959	2.4237	2.35983		BOLA1	0.678845	0.815884	0.732412
BIN3	1.38065	0.671149	1.24954		BOLA2	2.04245	1.35936	1.44867
BIRC2	20.8513	15.5247	16.1527		BOLA2B	8.11594	6.04404	11.2576
BIRC3	5.06839	4.66786	3.6813		BOLA2P2	0.562014	0.977653	1.96176
BIRC5	72.9918	63.692	54.0455		BOLA2-SMG1P6	0.351884	1.51504	0.635088
BIRC6	5.22241	4.94155	4.89143		BOLA3	2.26485	2.53619	1.97468
BISPR	0.568461	0.799288	0.730554		BOLA3-AS1	0.686423	0.877992	0.669477
BIVM	5.24656	4.67621	4.95403		BOLL	0.0239459	0.00462836	0.0371491
BIVM-ERCC5	0.000618473	0.00422746	0.011662		BOP1	3.26858	3.27197	2.79556
BLACE	0	0	0		BORA	5.05614	3.70257	2.80013
BLCAP	5.83804	4.55016	4.33978		BORCS5	0.213547	0.203947	0.166863
BLK	0.849182	0.561188	0.683879		BORCS6	6.78574	7.54805	7.49725
BLM	4.98839	5.36155	4.55972		BORCS7	5.05438	3.72522	2.6645
BLMH	19.7379	15.5124	14.3395		BORCS8	0.580466	0.592003	0.490001
BLNK	1.14567e-36	1.61175e-36	3.29292e-37		BORCS8-MEF2B	0.0501016	0.0751866	0.0635464
BLOC1S1	22.9586	24.2037	23.9994		BPGM	1.79094	1.34778	1.1711
BLOC1S2	9.4618	7.72841	7.84835		BPHL	0.5612	0.531419	0.351498
BLOC1S3	0.339149	0.428647	0.31922		BPIFB9P	0.0473847	0.185463	0.0827003
BLOC1S4	14.7522	23.3978	11.8805		BPNT1	1.14978	0.987442	1.20992
BLOC1S5	5.03969	6.30536	4.68277		BPNT2	16.7768	14.5882	11.6457
BLOC1S5-TXNDC5	0.000783938	0.000851282	0.000263359		BPTF	7.33672	7.10081	6.53002
BLOC1S6	23.1013	19.8445	18.6882		BPTFP1	6.67155	6.99094	6.78211
BLVRA	0.983757	1.03053	0.910026		BRAF	1.53301	1.20606	0.9717
BLVRB	1.22197	0.666229	1.10711		BRAFP1	0.458072	0.598264	0.296178
BLZF1	4.66441	4.38809	4.6887		BRAP	3.6586	3.44155	2.7071
BMERB1	0	0	0		BRAT1	1.71046	1.36374	1.22831
BMF	0.677636	0.363346	0.790683		BRCA1	3.43656	3.13508	2.37905
BMI1	93.924	90.3338	79.0046		BRCA2	6.18747	5.30692	4.67965
BMP1	0.219358	0.161726	0.21116		BRCC3	1.9894	2.049	2.08845
BMP10	0.123353	0.103937	0.10555		BRCC3P1	3.35081	3.23699	4.83483
BMP2	0	0	0		BRD1	3.11434	3.14322	2.53055
BMP2K	4.10266	4.30552	3.69238		BRD2	79.6984	75.0563	64.8541
BMP4	0	0	0		BRD3	10.9064	10.4841	9.73524
BMP8A	0	0	0		BRD3OS	1.94342	1.50453	1.6977
BMP8B	0	0	0		BRD4	5.07255	4.99757	4.92521
BMPER	0	0	0		BRD7	5.6272	5.82193	5.28793
BMPR1A	0.735941	0.648281	0.657366		BRD7P2	25.3126	24.7807	27.6181
BMPR1AP1	7.09567	3.55309	3.02323		BRD7P3	3.20532	1.78271	1.50619
BMPR1B	2.34222	2.09875	1.86318		BRD7P4	1.28813	0.456142	0.457069
BMPR2	2.16966	1.89079	1.7582		BRD7P5	13.0298	10.228	9.38746
BMS1	10.7163	11.118	10.5322		BRD8	6.72961	6.8895	6.02871
BMS1P1	0.632475	0.677973	0.547103		BRD9	3.11003	2.73083	2.91251
BMS1P11	0.737606	7.17738e-19	0		BRF1	0.499484	0.555619	0.462751
BMS1P15	0.559887	0.297851	0.834211		BRF2	8.927	7.84832	5.42649
BMS1P2	0.0316566	0.0698706	0.000733291		BRI3	0.343013	0.311452	0.228797
BMS1P23	0	0.145671	0.192302		BRI3BP	8.77516	7.40092	5.54283
BMS1P4	0.456618	0.922661	0.441606		BRICD5	0.386224	0.167674	0.421109
BMS1P4	0.00176677	8.5273e-09	0.0509261		BRIP1	1.90502	1.83277	1.45583
BMS1P4-AGAP5	0.204684	0.0837213	0.35417		BRIX1	17.0657	15.4903	13.4514
BMS1P7	0.0431881	2.63291e-05	1.78458		BRK1	10.4874	8.72457	7.4615
BMT2	1.98265	2.08595	1.75152		BRME1	1.21787	1.2424	0.993666
BNC2	0.0617001	0.0401726	0.0599943		BRMS1	4.90689	5.19261	5.49522
BNIP1	2.98392	1.74903	1.88719		BRMS1L	0.428202	0.299059	0.298704
BNIP2	35.083	30.3858	28.198		BROX	10.325	9.18491	7.2742
BNIP3	0	0	0.0711559		BRPF1	6.81688	7.46887	5.56467
BNIP3L	9.78439	7.9419	7.34265		BRPF3	4.76043	4.48651	3.69903
BNIP3P41	7.54434	6.35681	7.53139		BRSK1	0.125412	0.136351	0.136801
BNIP3P5	0	0	3.46116e-12		BRSK2	0.0109444	0.00571151	0.0191012
BNIPL	0.113496	0	0.194231		BRWD1	4.67946	4.28204	3.49664
BOD1	6.66304	6.30169	5.23596		BRWD1-AS2	0.929947	1.07846	1.75829
BOD1L1	6.07577	5.67385	5.87453		BRWD1-IT1	0.352372	0.204323	0.307497
BOK	0	0	0		BRWD3	1.61403	1.48578	1.30448
BOLA1	1.70389	1.26678	1.02916		BSCL2	0.833606	0.653497	0.572986
BOLA2	1.45321	2.91878	2.7146		BSDC1	2.57267	2.44023	2.06488
BOLA2B	18.9019	10.6337	16.4439		BSG	24.192	21.8276	16.8649
BOLA2-SMG1P6	1.44372	0.786026	0.90336		BSG-AS1	0.821778	0.844709	0.91452
BOLA3	8.47241	7.82831	7.64784		BSN	0.167397	0.136128	0.131827
BOLA3-AS1	0.98367	1.38139	0.841698		BSN-DT	0.283339	0.219059	0.604402
BOP1	12.589	10.5333	7.9849		BST1	0.239568	0.121877	0.169614
BORA	7.45843	8.27704	6.03173		BST2	27.9954	25.5852	22.7773
BORCS5	0.362691	0.305601	0.455818		BTAF1	3.89067	3.45432	3.14863
BORCS6	19.0273	17.2198	26.5321		BTBD1	5.51343	4.68083	3.21925
BORCS7	7.85766	5.50036	5.27542		BTBD10	2.03138	1.83011	1.48375
BORCS7-ASMT	0	1.09287e-11	0		BTBD10P1	2.12784	2.84134	0.879505
BORCS8	0.826037	1.30406	0.548932		BTBD10P2	2.75963	0.845014	1.13041
BORCS8-MEF2B	0.110613	0.122457	0.0363921		BTBD11	0.00280165	0.00203068	0.00366729
BPGM	4.23366	3.36908	3.38782		BTBD18	0.847915	0.821303	0.908098
BPHL	1.24957	0.990943	1.28935		BTBD2	2.5906	2.29046	1.64286
BPI	0	0	0		BTBD3	3.14153	2.94292	2.22804
BPNT1	2.0792	1.81803	1.51057		BTBD6	50.337	44.6796	31.3461
BPNT2	32.295	30.4879	26.987		BTBD6P1	0.126516	0.770174	0.219479
BPTF	8.29777	7.54608	8.08178		BTBD7	1.29909	1.06319	1.03615
BRAF	2.40373	2.12585	1.91157		BTBD8	0.46691	0.380892	0.367503
BRAP	7.11736	5.25052	5.55946		BTBD9	0.0753253	0.054352	0.0539419
BRAT1	5.57041	4.02308	3.83791		BTD	0.377853	0.323469	0.32339
BRCA1	6.83133	5.9205	6.17061		BTF3	67.1965	58.6104	46.6502
BRCA2	6.89586	6.73187	5.66663		BTF3-DT	0.642464	1.86266	1.68193
BRCC3	3.80561	3.73541	3.2576		BTF3L4	5.12314	4.51963	3.00361
BRCC3P1	1.43993	0	0		BTF3L4P2	166.647	126.894	88.1914
BRD1	4.12754	3.87991	3.51141		BTF3L4P3	6.0995	5.93897	3.45405
BRD2	113.232	112.633	99.9766		BTF3P10	18.5516	19.9309	27.0889
BRD3	19.189	17.3092	15.5508		BTF3P5	6.5883	5.52038	2.24143
BRD3OS	13.5216	11.0372	9.52123		BTG1	51.0375	45.0206	36.5181
BRD4	4.86727	4.1236	4.96352		BTG2	129.105	115.833	97.7877
BRD7	5.85995	5.59927	5.98012		BTG3	2.74268	2.67675	2.9924
BRD7P2	21.4124	19.3321	17.6509		BTG3-AS1	0.222002	0.267076	0.231847
BRD7P4	6.93875	2.38895	1.53952		BTN2A1	9.27032	9.13783	7.50574
BRD7P5	3.04902	2.47248	1.27213		BTN2A2	4.09772	3.65633	2.79225
BRD8	6.43889	5.3419	5.05751		BTN2A3P	0.536273	0.479044	0.366793
BRD9	3.86534	3.15433	3.59393		BTN3A1	4.15112	3.60681	2.65633
BRF1	0.815474	0.810179	0.718608		BTN3A2	4.69841	4.0169	2.75267
BRF2	22.1725	21.3277	17.965		BTN3A3	3.12766	2.93178	2.06449
BRI3	0.55709	0.732265	0.305079		BTRC	0.667769	0.607395	0.50544
BRI3BP	21.411	20.8543	17.0248		BUB1	37.8837	32.9878	24.6718
BRICD5	1.56546	0	0.66976		BUB1B	13.4225	12.5114	10.5124
BRIP1	3.30442	3.16262	2.73145		BUB3	28.4428	23.0653	18.0096
BRIX1	54.036	45.1078	45.1641		BUB3P1	1.11729	0.278099	1.39179
BRK1	14.3811	14.2001	14.9012		BUD13	5.59823	5.39963	4.59397
BRME1	1.61027	1.08544	1.01043		BUD23	3.01575	2.9736	2.38688
BRMS1	11.2899	11.3314	9.66043		BUD31	22.7563	22.0137	18.9212
BRMS1L	1.09868	0.915454	0.699859		BYSL	6.0984	6.69629	4.32241
BROX	27.7695	24.3132	24.2994		BZW1	60.3961	49.0031	37.3641
BRPF1	12.5486	12.9155	12.9801		BZW1-AS1	0.0625688	0.0945376	0.0442286
BRPF3	6.49672	5.56483	5.6512		BZW1P2	4.66783	2.89011	5.56402
BRSK1	0.0424339	0.0715091	0		BZW2	2.50286	2.08554	1.66065
BRSK2	0	0	0		C10orf143	0.0596574	0.0549409	0.0413417
BRWD1	4.30393	3.82485	3.97286		C10orf88	1.47793	1.55973	1.26246
BRWD1-AS2	1.25861	2.121	2.15392		C10orf88B	0.0912429	0.0769383	0.069258
BRWD3	3.02322	2.36872	2.31873		C10orf95	1.37476	1.18511	1.12077
BSCL2	0.561023	1.36861	0.361793		C10orf95-AS1	0.892844	1.18321	1.00041
BSDC1	4.51359	4.96217	3.82537		C11orf1	1.84899	1.47744	1.20677
BSG	56.0197	54.8755	46.9378		C11orf16	0.0492865	0.0750194	0.0860196
BSG-AS1	2.32012	1.95492	1.10292		C11orf21	0.0858696	0.0560155	0.0936674
BSN	0.0221034	0.00931208	0.0283698		C11orf24	1.31481	0.844697	0.795333
BSPRY	0	0.100511	0.0510355		C11orf49	0.107762	0.118073	0.10564
BST1	0.917653	0.463925	0.596759		C11orf54	4.23388	3.82205	2.80716
BST2	70.1718	79.7801	64.1567		C11orf58	4.05537	3.47562	3.11953
BTAF1	6.48408	6.11824	5.55865		C11orf65	0.0335772	0.0418796	0.0257384
BTBD1	21.0509	17.0081	14.7673		C11orf68	4.80892	4.12118	3.45594
BTBD10	2.97299	2.47606	2.95497		C11orf71	1.23884	1.339	1.07955
BTBD11	0.0492937	0.0479245	0.0259565		C11orf80	0.249849	0.215265	0.174357
BTBD19	0.18213	0	0		C11orf95	6.79721	6.48922	4.89864
BTBD2	9.57749	9.56926	8.46391		C11orf96	0.283645	0.216609	0.277525
BTBD3	8.00388	8.29332	5.9849		C11orf98	6.47154	5.42519	5.91068
BTBD6	156.604	160.052	119.744		C12orf29	6.23321	5.16239	4.70138
BTBD6P1	5.13198	1.73536	0.878981		C12orf4	1.71651	1.3647	1.15835
BTBD7	2.23445	2.13248	1.69179		C12orf42	0.00246654	0.00107267	0.00322863
BTBD7P1	0	0.834619	0		C12orf43	3.1335	3.12344	2.5918
BTBD8	0.619537	0.490697	0.286265		C12orf45	1.33075	1.18426	0.944526
BTBD9	0.167321	0.140984	0.131437		C12orf57	35.9752	31.3559	22.2842
BTD	0.106956	0.153204	0.201342		C12orf60	0.0464427	0.0269298	0.0202641
BTF3	135.865	126.394	124.221		C12orf65	2.38043	2.55821	2.15569
BTF3-DT	5.21715	1.46531	0		C12orf66	1.03177	0.797269	0.606689
BTF3L4	13.0525	12.7182	11.1183		C12orf73	0.481921	0.410838	0.470449
BTF3L4P2	231.021	246.731	164.102		C12orf75	1.28509	1.13929	0.942452
BTF3P10	2.61385	17.6193	6.70978		C12orf76	0.273494	0.320234	0.351748
BTF3P7	0	0	0		C13orf46	0.0391054	0.142854	0.170626
BTG1	40.6549	37.8559	35.1875		C14orf119	6.89252	6.24134	4.81769
BTG2	13.2154	10.605	9.96187		C14orf28	1.27682	1.20772	1.16992
BTG3	3.2861	3.55995	2.81183		C14orf93	0.408061	0.36175	0.241108
BTG3-AS1	0.301513	0.203242	0.103199		C15orf39	1.28221	1.38356	1.00113
BTK	0	0	0		C15orf40	1.25748	1.26957	1.31143
BTN2A1	11.0847	11.8084	11.4004		C15orf61	1.07799	0.840897	1.0795
BTN2A2	7.97901	6.31736	6.50921		C15orf62	0.324668	0.673274	0.883505
BTN2A3P	0.470792	0.595029	0.503554		C16orf54	4.69683	3.6531	3.62576
BTN3A1	7.11455	7.33118	6.24597		C16orf70	0.963735	0.766576	0.567599
BTN3A2	15.5572	15.8693	12.4495		C16orf71	0.120102	5.14284e-38	0.0214507
BTN3A3	9.13728	7.17384	6.31299		C16orf72	22.2404	19.9494	15.9892
BTNL9	0	0	0		C16orf86	0.585404	0.54687	0.858271
BTRC	0.88468	0.681072	0.69709		C16orf87	4.75534	4.52484	3.73555
BUB1	36.164	37.249	32.4738		C16orf91	7.60984	8.68724	4.98053
BUB1B	22.4968	21.1324	17.7393		C16orf95	0.0154574	0.00888883	0.00772909
BUB3	55.7283	54.6241	48.1684		C16orf95-DT	0.59563	1.29516	0.779663
BUD13	7.97645	7.51159	8.56499		C17orf100	0.0884296	0.110355	0.150981
BUD23	5.37718	5.17099	4.95118		C17orf107	0.105827	0.135394	0.257738
BUD31	61.1798	60.1911	59.6125		C17orf49	33.0989	27.0902	22.7633
BVES	0	0	0		C17orf58	0.563636	0.490237	0.336533
BYSL	27.002	27.6608	21.475		C17orf67	0.43861	0.487955	0.397587
BZW1	150.413	137.734	119.095		C17orf75	3.24808	2.80877	2.17907
BZW1P2	72.6305	66.5954	102.796		C17orf80	8.02991	8.30153	7.43125
BZW2	10.3477	9.51322	7.29607		C17orf97	0.0845135	0.187111	0.167615
C10orf143	0.0854913	0.16808	0.109729		C18orf15	0.440141	0.382824	0.219479
C10orf55	0	0	0		C18orf21	7.08166	7.53129	6.24929
C10orf88	2.37648	2.18867	2.53667		C18orf25	1.63867	1.54539	1.22463
C10orf88B	0.136663	0.287878	0.313372		C18orf32	1.29224	1.3056	1.50799
C10orf95	0	0.63866	0		C18orf54	9.82363	8.86913	6.71959
C10orf95-AS1	3.20856	2.70352	3.43185		C19orf12	2.46753	2.24488	1.74078
C11orf1	2.94016	2.94186	5.50334		C19orf18	0.0395903	0.0430433	0.0518225
C11orf21	0	0.293773	0.149167		C19orf25	1.33973	1.49491	1.01528
C11orf24	1.45595	2.55578	1.7649		C19orf44	0.364937	0.612154	0.53148
C11orf45	0	0	0		C19orf47	1.59925	1.40054	1.17018
C11orf49	0.272753	0.148425	0.2188		C19orf48	6.65548	5.94526	4.31436
C11orf54	9.41611	7.7572	6.15329		C19orf53	26.3461	27.6651	28.8513
C11orf58	8.84921	7.99826	7.06665		C19orf54	2.05531	1.93034	2.19655
C11orf65	0.0650942	0.027424	0.0278496		C19orf67	0.074944	0.130369	0.163499
C11orf68	8.03992	6.2905	3.43977		C19orf71	0.179629	0.144522	0.0899539
C11orf71	2.71069	2.76485	2.31946		C19orf73	3.43571	4.10891	3.37293
C11orf80	0.287331	0.338154	0.344667		C1D	0.868439	0.759345	0.663823
C11orf95	15.4377	14.8484	11.0911		C1DP1	13.9691	9.34626	8.99906
C11orf96	0.209395	0.117623	0.298623		C1GALT1	2.42604	2.28998	1.99424
C11orf98	6.29317	8.68259	6.55926		C1GALT1C1	8.47389	6.01019	5.61745
C12orf29	9.04072	10.6246	8.75377		C1GALT1P1	0.438928	0.636282	1.27677
C12orf4	3.61853	3.58574	2.46394		C1orf109	4.17722	3.97061	3.08543
C12orf43	10.2591	6.60228	8.57102		C1orf112	0.747348	0.621963	0.503346
C12orf45	3.91622	2.66711	3.09904		C1orf122	5.6859	4.18269	4.44627
C12orf57	78.247	64.129	54.5142		C1orf131	7.38821	7.50769	7.89156
C12orf60	0.163427	0.116518	0.0968124		C1orf147	0.0243362	0.0846317	0.105126
C12orf65	3.61514	3.17853	4.1245		C1orf159	0.281357	0.292859	0.1771
C12orf66	3.05654	1.96944	1.56924		C1orf162	0.134998	0.293544	0.294514
C12orf73	0.363063	0.568127	0.710087		C1orf174	5.64913	5.26089	3.36116
C12orf75	2.3977	2.1152	2.03098		C1orf194	0.0604519	0.0525796	0.087922
C12orf76	1.1382	1.35669	0.736382		C1orf198	2.37984	2.13393	1.62287
C13orf46	0.0635114	0.0535143	0.163035		C1orf21	0.0289703	0.0412326	0.0321757
C14orf119	15.938	12.3285	15.4263		C1orf216	4.28651	4.33587	3.74061
C14orf28	1.16645	1.52887	0.7763		C1orf220	0.103833	0	0.430394
C14orf93	0.959476	0.404224	0.820997		C1orf35	8.80638	10.1733	12.462
C15orf39	5.08867	4.88136	4.15327		C1orf43	14.3881	12.2659	9.89298
C15orf40	1.67301	1.17473	1.43155		C1orf50	1.51162	1.58211	1.4746
C15orf61	1.43506	1.45101	2.0875		C1orf52	5.65527	5.03287	4.03387
C15orf62	0	0	0		C1orf53	0.0672566	0.146246	0.0880371
C15orf65	0.502272	0.317409	0.107445		C1orf56	0.743937	0.723837	0.613837
C16orf46	4.09725e-07	0.0554086	1.38815e-19		C1orf74	5.88129	4.75003	3.32671
C16orf54	49.143	52.2229	45.1883		C1QBP	26.2348	25.9136	23.4826
C16orf70	2.27909	2.31571	1.60601		C1QBPP2	1.25678	2.29342	1.58677
C16orf71	0	0.144847	0		C1QL1	0.092516	0.128749	0.0645871
C16orf72	53.8558	50.7411	41.7791		C1QL3	0.469426	0.238172	0.136547
C16orf74	0	0	0		C1QTNF1	0.112226	0.143848	0.103088
C16orf86	1.99669	3.36479	0.569503		C1QTNF3	0.285877	0.218597	0.209544
C16orf87	7.03466	5.04456	5.53909		C1QTNF3-AMACR	0.0104377	5.21983e-05	0.0103028
C16orf91	18.0238	13.0172	14.3209		C1QTNF6	0.306725	0.201889	0.224258
C16orf95	0.0219948	0.0190742	0.00714188		C1R	0.52994	0.562109	0.31582
C16orf95-DT	0	2.03774	0		C1RL	0.690689	0.865753	0.656116
C17orf100	0	0.0526142	0.0534309		C1RL-AS1	0.65767	0.60632	0.743445
C17orf107	0	0	0		C1S	0.00577468	0.00837112	0.00839913
C17orf113	0	0	0		C20orf144	0.290309	0.547081	0.422229
C17orf49	46.2741	48.6181	38.7817		C20orf194	0.00603664	0.010501	0.00614584
C17orf58	8.19047	10.5548	6.80223		C20orf197	1.70472	1.27207	1.29252
C17orf64	0	0	0		C20orf202	0.198091	0.114863	0.0576212
C17orf67	0.248494	0.162851	0.401633		C20orf204	0.425336	0.320621	0.494892
C17orf75	5.23457	6.50887	4.78348		C20orf27	2.2213	1.79611	1.29552
C17orf80	11.8347	12.3182	12.1784		C20orf96	0.944017	0.9185	0.656244
C17orf97	0.374343	0.157709	0.3737		C21orf58	2.25934	2.11134	1.76037
C18orf21	10.876	9.8186	7.8608		C21orf62	0.0966856	0.0300339	0.0529893
C18orf25	3.5448	3.1735	2.73698		C21orf62-AS1	0.04606	0.0272118	0.0265433
C18orf32	1.38443	1.42912	1.31294		C21orf91	8.13081	7.19955	6.02553
C18orf54	14.4009	12.9723	11.3496		C22orf15	0.166316	0.241096	0.096757
C19orf12	4.83669	3.8813	3.21893		C22orf23	0.00144682	0.0916862	0.0702572
C19orf25	4.36605	3.6788	3.18471		C22orf24	0.916153	1.08787	0.896807
C19orf38	0	0	0		C22orf31	0.100842	0.394696	0.22
C19orf44	0.414713	0.393114	0.354858		C22orf34	0.0150795	0.0102645	0.0137313
C19orf47	2.36528	2.74503	1.90934		C22orf39	1.21557	1.09176	0.838478
C19orf48	23.2772	23.2341	19.458		C22orf46	3.40686	4.32508	5.15019
C19orf53	25.7692	25.2476	27.1779		C2CD2	0.263598	0.15687	0.17353
C19orf54	3.99114	2.75147	2.38022		C2CD2L	1.41238	1.21141	1.1227
C19orf73	6.97495	13.2234	5.96827		C2CD3	1.18222	1.10871	0.839539
C19orf81	0	0	0		C2CD4B	11.6473	10.4471	9.13169
C1D	1.24779	0.977305	1.23579		C2CD4D-AS1	0.243425	0.114006	0.0653613
C1DP1	98.7028	87.8952	69.0325		C2CD5	3.21769	2.72358	2.06175
C1GALT1	4.69937	3.95966	3.21207		C2orf15	0.148238	0.125187	0.0918675
C1GALT1C1	15.3573	13.1888	13.6462		C2orf16	0.0421734	0.0397382	0.0306688
C1GALT1C1L	0	0	0		C2orf27A	0.0162331	0.00527627	0.00611809
C1GALT1P1	0	2.00219	2.03327		C2orf42	0.424427	0.422494	0.346435
C1orf109	13.6896	13.066	10.6772		C2orf49	10.6539	8.31729	6.95199
C1orf112	0.612997	0.584618	0.478412		C2orf49-DT	2.77178	2.65191	3.50724
C1orf122	9.9286	11.4479	5.8128		C2orf50	0.0262778	0.038093	0.0229313
C1orf127	0	0	0		C2orf68	13.1431	11.0451	9.4081
C1orf131	5.56895	8.38369	8.70442		C2orf69	2.83022	2.45234	2.13654
C1orf159	0.486918	0.189357	0.51279		C2orf76	0.283595	0.233795	0.221655
C1orf162	0	0	0		C2orf81	0.150306	0.111831	0.0936988
C1orf174	23.5162	16.7887	14.6703		C2orf88	0.0177102	0.0179712	0.0180306
C1orf189	0	0	0		C2orf92	0.0656223	0.107019	0.0894769
C1orf198	4.10418	4.76756	3.92098		C3AR1	0.0837174	0.0728154	0.087667
C1orf21	0.0106934	0.0225255	0.00457502		C3orf18	1.24985	0.959194	0.866125
C1orf216	10.0559	12.8181	11.0314		C3orf33	0.206571	0.134914	0.161165
C1orf220	0.210794	0	0		C3orf35	0.0970134	0.0679727	0.0799553
C1orf35	9.11164	13.4936	12.2855		C3orf38	6.17934	5.01291	4.51097
C1orf43	36.657	31.3561	29.3811		C3orf49	0.0325852	0.0566837	0.0663494
C1orf50	3.28214	3.04218	3.89811		C3orf62	4.0769	4.10757	3.23573
C1orf52	15.8404	15.8145	12.9847		C4A	0.0621007	0.0574316	0.0476001
C1orf53	1.09232	0.230096	0.701001		C4B	0.100132	0.0500771	0.0443591
C1orf54	0	0	0		C4BPB	0.228965	0.112021	0.0499515
C1orf56	0.610885	1.28682	0.261358		C4orf19	0.00657729	0.00326901	0.0016399
C1orf74	24.9004	21.7957	17.5831		C4orf3	11.8899	11.3601	7.37896
C1QBP	91.5552	92.2191	77.0307		C4orf33	2.62191	2.11642	1.50387
C1QTNF12	0	0.254897	0		C4orf46	103.066	89.3492	68.365
C1QTNF3	0.255138	0.0859909	0		C4orf48	0.727908	1.26623	1.05868
C1QTNF3-AMACR	2.10544e-05	8.07011e-06	3.60459e-05		C5	0.133398	0.142911	0.11357
C1QTNF4	0	0	0		C5orf15	7.84088	7.42817	5.75591
C1QTNF6	0.33659	0.0567218	0.345613		C5orf22	6.39647	6.00784	4.15281
C1R	2.30914	2.83006	2.15549		C5orf24	10.6663	9.54143	7.96523
C1RL	1.51428	2.94017	1.63374		C5orf34	2.26221	2.04127	1.65553
C1RL-AS1	1.43264	0.829904	1.76219		C5orf51	10.2361	9.23668	7.29903
C1S	0.0312623	0.0263414	0		C5orf58	0.568079	0.621161	0.514908
C2	0	0	0		C5orf66	0.0610022	0.0379833	0.0766642
C20orf144	0	0	0		C6orf120	16.9711	16.66	13.4004
C20orf194	0.0572276	0.0550728	0.0349547		C6orf136	1.26494	1.6391	1.44176
C20orf197	4.99265	3.44191	3.8837		C6orf163	0.208316	0.181188	0.18852
C20orf203	0.0181132	0	0		C6orf201	0.0207931	0.0626399	0.0417393
C20orf204	0.230264	0.582057	0.591091		C6orf223	5.90247	5.38093	4.38042
C20orf27	12.6902	12.7548	10.9362		C6orf226	1.43026	4.47842	2.2466
C20orf96	1.55917	1.42323	0.833838		C6orf47	9.31197	8.2669	7.9019
C21orf58	2.02037	1.93239	2.14928		C6orf52	0.0749632	0.0355643	0.0356817
C21orf62-AS1	0.0211716	0	0.0301933		C6orf62	39.3326	35.605	26.6856
C21orf91	12.38	11.901	10.9208		C6orf89	5.24082	4.75737	4.0839
C22orf15	3.60154	2.65531	0.770434		C7orf25	1.67853	1.98799	1.4221
C22orf23	0	0.102655	0		C7orf26	2.26569	2.05214	1.45685
C22orf24	0.323463	0.490587	0.221423		C7orf31	0.648978	0.597848	0.417135
C22orf34	0.111806	0.112151	0.132114		C7orf50	0.237967	0.286434	0.266713
C22orf39	3.37081	2.94207	2.79238		C8orf17	0.172498	0.0500116	0.301061
C22orf46	2.93423	2.35463	3.10853		C8orf33	9.64642	8.72168	7.28392
C2CD2	0.431867	0.253139	0.289202		C8orf37	0.380468	0.233928	0.217527
C2CD2L	1.58299	2.26748	2.23495		C8orf44	0.194028	0.250248	0.165797
C2CD3	1.50208	1.30691	1.3272		C8orf44-SGK3	0.00634885	0.0176771	0.00900721
C2CD4B	22.9066	36.7341	21.4974		C8orf58	2.48259	1.29683	1.08183
C2CD5	4.81331	4.01023	3.64561		C8orf76	3.95001	2.56367	1.99881
C2orf15	0	0.109424	0.666735		C8orf82	6.71452	7.61418	6.54305
C2orf27A	0	0.00912944	0		C9orf129	0.0720495	0.0287856	0.0164066
C2orf42	0.458669	0.419598	0.426111		C9orf131	0.161159	0.26575	0.459872
C2orf49	23.7059	20.1611	16.019		C9orf147	0.00908459	0.0142228	0.0174408
C2orf49-DT	6.7525	6.63788	5.13593		C9orf152	0.0439849	0.0612112	0.0767667
C2orf68	41.0205	26.7228	27.1376		C9orf153	0.0283126	0.0105538	0.0176478
C2orf69	4.14446	4.1026	3.67029		C9orf16	3.13619	1.899	1.48861
C2orf74	0	0	0		C9orf163	0.125402	0.226723	0.219867
C2orf76	0.400512	0.371216	0.308436		C9orf40	14.0705	12.6541	10.6971
C2orf81	0.173812	0.29301	0.448007		C9orf43	0.0811382	0.0737433	0.070805
C2orf92	0.0666111	0	0.0569972		C9orf64	2.54233	2.01091	1.55597
C3	0	0	0		C9orf72	1.05648	0.851933	0.682143
C3AR1	0.135966	0.114564	0.698054		C9orf78	14.6992	16.5186	14.6921
C3orf18	4.47769	2.76677	3.91658		C9orf85	0.656176	0.561431	0.51479
C3orf33	0.414865	0.280853	0.152139		CA11	0.521953	0.571681	0.354263
C3orf35	0.372017	0.29502	0.411949		CA13	0.117954	0.0938623	0.0591314
C3orf38	9.37425	10.338	7.60842		CA14	0.386726	0.247848	0.124333
C3orf62	4.3443	3.15559	2.30729		CA5B	0.210099	0.195599	0.144433
C3orf80	0	0	0		CA5BP1	0.273441	0.205804	0.181355
C3orf86	0	0	0		CA6	0.0327101	0.0237087	0.023787
C4A	0.213269	9.54557e-09	0		CAAP1	2.26528	2.22022	1.79806
C4B	0.163132	0.158581	0		CAB39	4.23818	4.0435	3.01372
C4BPB	0.232415	0.587494	0.198871		CAB39L	0.192964	0.170906	0.126293
C4orf3	40.6193	37.8926	34.0672		CABIN1	0.973476	0.883947	0.72411
C4orf33	2.71818	2.10336	2.04107		CABLES1	0.0139201	0.00660403	0.00441722
C4orf36	0.0605425	0	0.0203831		CABLES2	3.41655	3.34309	2.89201
C4orf46	112.902	111.148	91.2461		CABP7	0.103881	0.0517417	0.0258983
C4orf48	0.656778	0.553397	3.37192		CACFD1	0.322058	0.318316	0.293818
C5	0.330264	0.244885	0.158254		CACNA1C	0.000876433	0.000571725	0.000956022
C5AR2	0	0	0		CACNA1D	0.00164336	0.000857615	0.00172089
C5orf15	9.2383	8.19818	8.57771		CACNA2D2	0.00337489	0.00497654	0.00607226
C5orf22	12.4458	10.6783	8.55853		CACNB1	1.43885	1.61391	1.36454
C5orf24	19.6067	16.2877	12.2873		CACNB2	0.0343851	0.0252336	0.0343286
C5orf34	3.0936	3.75664	3.11425		CACNB3	2.31402	1.79312	1.89082
C5orf51	19.8723	15.5572	13.007		CACNB4	0.00358858	0.00260095	0.00231594
C5orf63	0	0	0		CACTIN	2.95586	3.69358	2.99876
C5orf66	0.0159273	0.0134202	0.00340713		CACUL1	4.6787	4.05577	3.12778
C6orf120	54.3351	49.4613	50.229		CACYBP	34.3971	36.0233	32.1734
C6orf132	0	0	0		CACYBPP2	9.99281	11.2043	8.00776
C6orf136	1.46743	2.11962	1.97315		CAD	6.32527	5.44423	4.70354
C6orf163	0.125307	0.211165	0.268053		CADM4	0.218724	0.214021	0.127246
C6orf223	9.01448	5.5804	7.71344		CAGE1	0.0202046	0.00439337	0.0176315
C6orf226	2.3229	0	1.98764		CAHM	0.177825	0.773338	1.08625
C6orf47	19.2957	19.3343	16.0645		CALB1	0.133971	0.060142	0.0942822
C6orf52	0.0553402	0.279776	0.236765		CALCOCO1	3.58783	3.61788	3.4346
C6orf62	80.4278	64.0951	60.4825		CALCOCO2	10.8106	11.0031	8.92083
C6orf89	12.1239	11.9149	9.98624		CALCRL	0.00598443	0.0104102	0.00652788
C6orf99	0	0.0221323	0		CALHM2	2.23166	1.55433	1.41763
C7orf25	13.115	14.895	15.3358		CALHM6	4.51062	3.92322	2.95214
C7orf26	5.74093	6.236	5.44502		CALM1	114.932	93.1226	63.3109
C7orf31	0.963342	0.525221	0.800061		CALM2	290.194	222.21	157.683
C7orf50	0.723514	0.50931	0.509378		CALM2P2	10.3216	12.0683	9.94794
C7orf61	0	0	0		CALM2P3	31.2006	23.8191	18.3118
C8G	0	0	0		CALM3	148.463	141.946	118.658
C8orf33	31.5707	28.2878	26.0021		CALML4	0.212034	0.225012	0.206073
C8orf37	0.479422	0.493726	0.364647		CALR	332.488	311.249	269.95
C8orf44	0.831156	0.48865	0.433997		CALU	10.6971	9.97412	8.58071
C8orf44-SGK3	0.00688901	0.0197797	0.0140173		CAMK1D	0.236374	0.214718	0.159639
C8orf48	0	0	0		CAMK2D	0.23306	0.200696	0.140304
C8orf58	2.84238	2.88826	1.25428		CAMK2G	1.86671	1.72082	1.38018
C8orf76	7.9682	6.75505	5.07179		CAMK2N2	1.97377	2.24952	1.84119
C8orf82	8.75254	10.9019	4.5587		CAMK4	0.778932	0.691293	0.548504
C8orf88	0	0.0407275	0.0827192		CAMKK1	0.2304	0.220436	0.160847
C9orf106	0	0	0		CAMKK2	0.930224	0.836513	0.685638
C9orf116	0	0	0		CAMKMT	0.0329801	0.0300352	0.023024
C9orf139	0	0.103887	0		CAMLG	8.57119	8.56056	7.91721
C9orf147	0.0442631	0.0124319	0		CAMSAP1	1.57304	1.34162	1.16498
C9orf16	11.6659	11.9147	13.3096		CAMSAP2	0.272244	0.251662	0.203142
C9orf163	0	0.84741	0		CAMTA1	0.0424126	0.0395646	0.0331971
C9orf40	37.2008	37.2009	37.7783		CAMTA2	2.6733	2.63603	1.87925
C9orf43	0.131777	0.277586	0.056379		CAMTA2-AS1	1.97475	2.45279e-10	0.129424
C9orf64	2.84044	3.38569	2.964		CAND1	19.0045	16.4337	12.9625
C9orf72	2.13234	1.91077	2.11419		CAND2	0.253527	0.196924	0.215697
C9orf78	32.5953	27.8461	30.2152		CANT1	4.38003	4.00813	3.37795
C9orf85	0.919904	1.1261	0.995059		CANX	42.6601	39.6101	32.0856
CA11	0.941898	1.71955	0.805955		CAP1	20.9914	18.9207	15.5128
CA13	0.0203798	0.0515157	0.104631		CAP1P1	1.39141	1.28196	0.316942
CA2	0	0	0		CAP1P2	3.71135	3.05251	1.38152
CA3	0	0	0		CAP2P1	0.917013	1.29609	1.90054
CA3-AS1	0	0	0		CAPG	4.76378	4.23121	2.58938
CA5B	0.220878	0.286462	0.149352		CAPN1	3.5155	2.85417	1.82639
CA5BP1	0.314555	0.372328	0.483179		CAPN10	0.884829	0.823296	0.731741
CA7	0	0	0		CAPN10-DT	1.11532	0.796848	1.0428
CAAP1	4.94017	4.83192	4.12096		CAPN14	0.0393067	0.034188	0.0228673
CAB39	8.60704	8.04797	6.7613		CAPN15	1.651	1.7757	1.38911
CAB39L	0.191095	0.21737	0.196217		CAPN2	0.0578015	0.0353783	0.0448359
CABIN1	2.26413	1.71892	1.62658		CAPN3	0.0327891	0.0337232	0.0546253
CABLES1	0.113039	0.060611	0.0263793		CAPN5	0.183031	0.269228	0.190256
CABLES2	5.34077	4.55854	5.40085		CAPN7	4.01352	3.08784	2.39934
CACFD1	0.832137	0.300494	0.610316		CAPNS1	17.2184	15.0694	13.5684
CACHD1	0	0	0		CAPRIN1	28.5376	25.6194	19.9241
CACNA1A	0	0	0		CAPRIN2	1.34765	1.17215	1.14846
CACNA1G	0	0.01633	0		CAPS	0.567412	0.466768	0.287198
CACNA2D1	0	0	0		CAPS2	0.0956402	0.0699241	0.0544306
CACNA2D3	0	0	0		CAPSL	0.115484	0.176784	0.128994
CACNA2D4	0	0	0.0087378		CAPZA1	12.2602	10.7222	8.33457
CACNB1	0.746936	0.989	1.00435		CAPZA1P2	1.92582	1.70498	2.29973
CACNB3	5.55192	4.03029	3.94667		CAPZA2	5.24309	4.25219	3.54177
CACNB4	0	0.0122771	0		CAPZB	2.78678	2.43897	1.77631
CACTIN	5.76077	6.67424	4.31317		CARD11	0.107589	0.114127	0.128646
CACUL1	5.85627	5.74118	5.58451		CARD16	0.208408	0.23235	0.189547
CACYBP	76.2796	75.2292	68.5579		CARD19	0.364089	0.267956	0.228108
CACYBPP2	123.161	101.692	108.319		CARD6	0.033778	0.044069	0.0515836
CAD	27.9464	24.1628	21.7881		CARD8	2.45942	2.09934	1.95359
CADM1	0	0	0		CARD8-AS1	4.49677	4.54361	3.53318
CADM4	0.0740064	0.124715	0		CARD9	1.10567	0.810588	0.813813
CAHM	0	1.21673	0		CARF	0.70801	0.546326	0.537009
CALCOCO1	3.83533	3.5151	3.16664		CARHSP1	9.86462	8.8292	6.99981
CALCOCO2	16.7995	18.2697	15.248		CARM1	1.25467	1.15982	0.955362
CALHM2	6.91038	5.04629	4.33621		CARMIL1	0.00653277	0.00771135	0.00488641
CALHM6	9.69582	12.2543	9.18716		CARMIL2	5.62255	5.37499	3.93405
CALM1	672.06	673.489	591.428		CARMIL3	0.206795	0.187685	0.133383
CALM2	715.808	662.81	559.422		CARNMT1	3.084	2.82495	2.51319
CALM2P2	107.374	95.8765	77.7527		CARNMT1-AS1	0	0.015993	0.0385099
CALM2P3	21.1523	7.47402	28.4554		CARNS1	0.439402	0.638208	0.526197
CALM3	226.014	195.605	183.474		CARS1	1.96305	1.87939	1.8931
CALML4	0.00216276	0.10273	0.239512		CARS1-AS1	0.0718082	0.0245521	0.0466067
CALR	726.805	723.413	693.066		CARS2	0.534105	0.531739	0.47379
CALR3	0	0	0		CASC15	0.129038	0.109557	0.101366
CALU	33.3051	33.9436	28.2385		CASC2	0.0223622	0.0160699	0.0135754
CAMK1	0	0	0		CASC3	19.7173	19.4512	15.2729
CAMK1D	0.215643	0.183942	0.148071		CASD1	2.35659	2.0555	1.58234
CAMK2D	0.443985	0.351906	0.334832		CASK	0.878322	0.837973	0.637251
CAMK2G	4.41766	3.82764	3.67308		CASKIN2	1.02209	0.926241	0.942046
CAMK2N2	0.552693	0.465695	0		CASP1	6.79659	5.14632	4.82075
CAMK4	4.06903	3.97517	3.21643		CASP10	0.805065	0.801536	0.615842
CAMKK1	0.374195	0.536	0.25615		CASP2	24.4617	22.6487	17.1641
CAMKK2	2.7527	2.7689	2.42844		CASP3	16.4489	15.0308	11.3391
CAMKMT	0.116579	0.090264	0.091665		CASP4	8.62759	8.49765	7.61805
CAMKV	0	0	0.092661		CASP4LP	0.809156	0.521907	0.587101
CAMLG	10.7008	10.4527	9.39949		CASP6	2.83265	2.25074	1.80282
CAMP	0	0	0		CASP7	4.45857	3.81807	2.90859
CAMSAP1	3.60492	3.29061	2.5817		CASP8	5.02928	4.98722	4.69111
CAMSAP2	0.459241	0.278967	0.438653		CASP8AP2	16.7581	15.236	13.2223
CAMSAP3	0	0	0		CASP9	0.165119	0.182432	0.0856756
CAMTA1	0.0946479	0.106333	0.10011		CAST	0.217886	0.199223	0.198514
CAMTA2	2.69498	3.54462	1.91231		CASTOR1	2.05605	1.45846	1.1706
CAND1	47.4877	42.7707	37.8988		CASTOR2	2.88084	2.67567	1.94351
CAND2	0.154347	0.173402	0.102721		CASTOR3	0.901048	0.807004	0.664253
CANT1	9.90775	10.4503	6.46508		CASZ1	0.266298	0.241134	0.198771
CANX	112.486	114.029	103.247		CAT	8.51801	7.50494	5.41016
CAP1	53.6793	49.298	40.5042		CATSPER2	0.251957	0.214254	0.186963
CAP1P1	10.16	12.2817	8.64126		CATSPER2P1	0.173704	0.100766	0.123662
CAP1P2	1.8413	3.26585	5.50021		CATSPER3	0.072046	0.0907205	0.0330712
CAPG	19.4515	19.8426	16.5038		CATSPERB	0.00238982	0.00277148	0.00556126
CAPN1	12.6336	11.0611	8.83831		CATSPERE	0.0136471	0.0215143	0.0141421
CAPN10	1.3368	1.40797	1.10811		CATSPERG	0.0588957	0.0788093	0.10279
CAPN10-DT	2.26424	0	1.10711		CBFA2T2	0.727121	0.636763	0.451987
CAPN11	0	0	0		CBFA2T3	0.400972	0.390827	0.28479
CAPN12	0	0.082345	0.0557487		CBFB	5.84049	5.74708	4.9848
CAPN14	0.0638383	0.0717197	0		CBL	3.4996	2.92414	2.25298
CAPN15	3.60405	2.26744	2.96053		CBLB	0.407831	0.380614	0.322772
CAPN2	1.02568	1.08395	1.10078		CBLL1	13.5304	12.3068	9.76265
CAPN3	0	0	0.0207123		CBLN3	0.252906	0.390215	0.157648
CAPN5	0.284147	0.331506	0.187028		CBR3-AS1	0.0182193	0.0202136	0.00631296
CAPN7	8.27246	6.3176	5.80013		CBR4	0.555732	0.506011	0.386259
CAPNS1	56.103	49.1588	50.9863		CBWD1	1.29383	1.01032	0.94347
CAPNS2	0	0	0		CBWD2	0.935633	1.26365	0.879309
CAPRIN1	70.2367	65.7586	59.2506		CBWD3	0.297419	0.452221	0.55765
CAPRIN2	0.940466	0.840457	0.780345		CBWD5	0.999344	0.635011	0.859763
CAPS	0.33407	0.844456	0.285854		CBWD6	0.188382	0.150173	0.109213
CAPS2	0.236372	0.123293	0.163732		CBX1	16.5783	18.5909	19.7668
CAPSL	0.300094	0.726964	0.41727		CBX1P1	5.9786	3.5773	3.25766
CAPZA1	28.7422	26.2168	21.6444		CBX1P2	4.87038	5.44646	2.42864
CAPZA2	8.37069	7.94706	7.34218		CBX2	16.5875	14.8219	10.9694
CAPZB	6.84108	5.69739	5.84617		CBX3	95.8113	84.9132	63.7856
CARD10	0	0	0		CBX3P1	1.22425	1.61121	0.780749
CARD11	0.197282	0.316627	0.128616		CBX3P2	0.296338	0.128874	0.129299
CARD16	0.0757272	0.096831	0.105191		CBX3P9	27.6576	27.6169	27.3874
CARD19	1.21296	1.27754	1.0379		CBX4	36.6828	39.6453	37.387
CARD6	0.137148	0.11556	0.234707		CBX5	58.9833	51.4679	38.6481
CARD8	3.16678	2.78432	3.1368		CBX5P1	0.852037	0.741082	2.47843
CARD8-AS1	9.22351	5.61287	5.26153		CBX6	9.72641	9.49649	8.5648
CARD9	3.36915e-06	0.214657	0.395874		CBX7	0.552303	0.533632	0.504457
CARF	0.969752	0.630749	0.611424		CBX8	1.71808	2.08918	1.4265
CARHSP1	26.4068	22.5215	20.46		CBY1	0.367581	0.263764	0.285689
CARM1	2.03408	1.73507	1.78348		CC2D1A	1.53495	1.4538	1.13654
CARMIL1	0.0530496	0.0542777	0.0389083		CC2D1B	2.64693	2.9469	2.18987
CARMIL2	16.6591	15.9431	13.2868		CC2D2A	0.0483965	0.0431465	0.067573
CARMIL3	0.438075	0.430639	0.687222		CC2D2B	0.0149323	0.00487315	0.0202207
CARNMT1	10.9736	9.15475	9.13414		CCAR1	10.2096	10.3968	10.0979
CARNS1	0.121603	0.102462	0.416208		CCAR2	18.1001	16.2067	12.0427
CARS1	2.55612	2.13454	1.60134		CCBE1	0.00597363	0.00103914	0.00104257
CARS2	1.55925	1.37422	1.15018		CCDC102A	0.124115	0.130679	0.102608
CASC11	0	0	0		CCDC102B	0.0285875	0.0297561	0.0306723
CASC15	0.0783939	0.0946777	0.0749054		CCDC103	0.662923	0.556337	0.665173
CASC2	0.0315805	0.0266095	0.0270226		CCDC106	1.33788	1.02099	0.855557
CASC3	25.9957	24.984	22.5566		CCDC107	3.27487	5.32759	4.74204
CASC4P1	2.95851	1.66188	2.53151		CCDC113	0.00907352	0.0184145	0.023754
CASC9	0.0167367	0.00940149	0.0143211		CCDC115	8.82387	9.59348	7.52513
CASD1	4.68268	4.49296	3.93735		CCDC116	0.103596	0.210246	0.120537
CASK	0.99108	0.867094	0.772176		CCDC117	23.3231	20.6108	16.13
CASKIN1	0	0.0561203	0.0569914		CCDC12	0.396444	0.482744	0.339037
CASKIN2	1.35509	1.64132	1.08704		CCDC120	1.22291	0.96155	0.828127
CASP1	7.45101	9.29925	6.80535		CCDC121	4.3904	4.18467	4.20209
CASP10	2.53157	2.60189	2.2376		CCDC122	0.011415	0.00496426	0.0199226
CASP2	45.9576	35.422	38.6428		CCDC124	3.78841	4.70904	4.63592
CASP3	26.157	25.8879	22.8386		CCDC125	1.22295	1.0005	0.786907
CASP4	6.49344	6.54091	6.68421		CCDC126	0.996513	0.808179	0.584633
CASP6	6.91808	6.12059	4.95767		CCDC127	2.85936	2.40888	1.94653
CASP7	8.47633	7.03675	6.67529		CCDC13	0.0189295	0.00789223	0.00816016
CASP8	7.05708	6.60918	6.58936		CCDC130	0.985178	1.226	0.859713
CASP8AP2	23.935	20.7058	19.8841		CCDC134	4.43977	3.92426	3.15652
CASP9	0.217436	0.36642	0.093027		CCDC136	1.57422	1.64747	1.87449
CASS4	0	0	0		CCDC137	4.44562	4.65936	4.51957
CAST	0.381549	0.210041	0.28295		CCDC138	5.40673	5.31748	4.76325
CASTOR1	1.2591	3.32033	2.92053		CCDC14	4.93373	4.25233	3.68292
CASTOR2	6.64804	5.45214	5.39897		CCDC142	1.87118	1.72273	1.36327
CASTOR3	1.0572	1.03627	0.773492		CCDC144A	0.0777171	0.0390516	0.0247775
CASZ1	0.299116	0.258845	0.255945		CCDC144B	0.69607	0.649184	0.739635
CAT	14.959	13.8878	11.8642		CCDC144CP	0.019415	0.0249391	0.112071
CATIP-AS1	0	0	0		CCDC144NL-AS1	0.235759	0.275187	0.31311
CATSPER1	0	0	0.113807		CCDC146	0.364757	0.369007	0.377756
CATSPER2	0.0979796	0.165114	0.223569		CCDC15	1.05043	0.969148	0.830718
CATSPER2P1	0.192376	0.216126	0.0548701		CCDC150	0.427188	0.386886	0.398436
CATSPER3	0.0295468	0.0746878	0.075847		CCDC153	0.0223403	0.0777242	0.116971
CATSPERE	0.0138527	0	0.0414869		CCDC157	0.236556	0.283847	0.256955
CATSPERG	0	0.092996	0.0314798		CCDC159	0.31957	0.49921	0.284666
CATSPERZ	0	0	0		CCDC15-DT	0.427955	0.372225	0.258545
CAV1	0	0	0		CCDC160	0.0869616	0.0151274	0.0910642
CAVIN1	0	0	0		CCDC162P	0.00589388	0.00366168	0.00293902
CBARP	0	0.111918	0		CCDC163	1.30767	0.869763	0.783134
CBFA2T2	1.24563	0.967776	1.00356		CCDC167	1.89814	2.20672	2.58301
CBFA2T3	0.69528	0.617793	0.551664		CCDC168	0.917175	1.05432	1.02504
CBFB	13.7508	12.2519	12.5342		CCDC17	0.317551	0.310723	0.415665
CBL	8.27072	6.75617	5.99697		CCDC171	0.0626521	0.0528585	0.058227
CBLB	0.477432	0.463387	0.42921		CCDC173	0.0195175	0.00565861	0.0113546
CBLL1	25.2652	22.888	19.6817		CCDC174	4.84529	4.98296	5.16563
CBLN3	0.586782	0.247209	0.502093		CCDC18	3.19837	3.26959	3.04035
CBR1	0	0	0		CCDC180	0.145868	0.237344	0.178992
CBR3	0	0.0949314	0		CCDC181	0.135601	0.115836	0.0908619
CBR3-AS1	0	0	0		CCDC183-AS1	0.596104	0.706136	0.494979
CBR4	1.89875	1.89009	1.65494		CCDC186	4.10784	4.21167	4.04059
CBS	0	0	0		CCDC189	0.412642	0.352257	0.87282
CBSL	0	0	0		CCDC18-AS1	0.123687	0.102584	0.150984
CBWD1	3.63591	3.77002	3.31859		CCDC191	0.124075	0.152884	0.120305
CBWD2	1.07911	1.33801	1.59288		CCDC196	0.00366388	0.00956025	0.00479591
CBWD3	1.38418	1.05681	0.980899		CCDC200	0.0126086	0.0141	0.0204339
CBWD4P	0.155354	0.275859	0.174338		CCDC22	2.00049	1.90596	1.44111
CBWD5	1.49927	0.820074	1.04877		CCDC25	4.28494	4.25158	3.48055
CBWD6	0.101089	0.261945	0.261047		CCDC26	0.12782	0.10114	0.100547
CBX1	24.0019	24.0747	19.7976		CCDC28A	2.42855	2.10521	1.8917
CBX1P2	5.65002	21.423	7.30274		CCDC28A-AS1	0.0164455	0.0171647	0.0143512
CBX2	46.9607	41.8964	39.9579		CCDC28B	4.62352	5.44746	4.52116
CBX3	235.632	223.339	201.51		CCDC30	0.0172498	0.014289	0.0217004
CBX3P1	17.592	12.4611	6.11632		CCDC32	0.655435	0.63046	0.531305
CBX3P2	0.401071	0.337939	1.71592		CCDC34	6.9813	7.18826	7.6582
CBX3P9	161.346	199.347	195.716		CCDC38	0.0210789	0.0366678	0.0257522
CBX4	57.2301	50.1298	42.1003		CCDC39	0.0359929	0.0263453	0.0274688
CBX5	144.214	126.125	117.121		CCDC43	8.79983	8.50717	6.44754
CBX6	25.0932	19.4318	18.8132		CCDC47	14.377	14.0379	11.853
CBX7	0.477525	0.23471	0.442655		CCDC51	2.1143	2.38644	2.04628
CBX8	4.46997	3.65224	4.05664		CCDC57	0.396285	0.39359	0.36669
CBY1	1.05197	0.696447	1.09303		CCDC59	1.41561	1.30338	1.02709
CC2D1A	1.99224	1.5903	1.52526		CCDC6	1.58236	1.19749	0.931181
CC2D1B	3.91637	3.77892	3.40517		CCDC61	0.579206	0.691357	0.74741
CC2D2B	0	0	0		CCDC62	0.571154	0.496776	0.432835
CCAR1	12.8903	10.6169	10.2542		CCDC65	0.0344735	0.079958	0.0200555
CCAR2	48.511	44.1682	40.0012		CCDC66	0.749275	0.778058	0.765456
CCDC102A	0.477417	0.670448	0.453903		CCDC69	0.0888421	0.0965909	0.113062
CCDC102B	0.0761133	0.0384795	0.0390768		CCDC7	0.733354	0.608076	0.489193
CCDC103	0	6.64493e-16	0.177167		CCDC71	7.55322	7.33606	5.93217
CCDC106	2.1386	1.35148	1.46395		CCDC71L	3.32769	3.13894	2.12681
CCDC107	4.01568	3.38359	3.43611		CCDC73	0.00714325	0.00309125	0.00707048
CCDC112	0	0	0		CCDC74A	1.57791	1.21996	1.46637
CCDC113	0.221046	0.0206946	0.0630475		CCDC74B	0.0724472	0.195539	0.138038
CCDC115	24.4277	18.9817	18.8119		CCDC77	1.43897	1.40997	1.08637
CCDC116	0	0	0.71984		CCDC78	0.145741	0.158452	0.0635902
CCDC117	50.8889	50.2874	44.543		CCDC80	0.0120856	0.00788385	0.0184564
CCDC12	0.622406	0.723359	0.569305		CCDC81	0.0658746	0.0372425	0.0488626
CCDC120	1.74781	1.94127	1.49555		CCDC82	8.59739	8.59417	7.63222
CCDC121	3.06691	7.42946	10.1691		CCDC85B	10.2581	11.9443	12.85
CCDC122	0	0	0		CCDC85C	0.749373	0.706195	0.591905
CCDC124	8.95809	9.03776	11.1952		CCDC86	9.86134	9.70463	7.08596
CCDC125	1.05703	0.994195	1.13582		CCDC87	0.33102	0.287913	0.337008
CCDC126	0.820158	0.898377	0.678393		CCDC88A	8.51117	8.07154	7.19634
CCDC127	4.98431	4.91678	4.62901		CCDC88B	0.101128	0.175917	0.232656
CCDC13	0.0191688	0	0		CCDC88C	0.983025	0.951485	1.00967
CCDC130	1.43593	1.14077	1.3691		CCDC9	1.47445	1.86111	1.8751
CCDC134	5.17772	5.02058	4.3601		CCDC90B	8.87342	8.50741	8.15523
CCDC136	1.40206	1.38984	1.97598		CCDC91	0.784766	0.685149	0.611652
CCDC137	13.7183	8.51713	7.41371		CCDC92	1.18455	1.09717	0.849556
CCDC138	7.64092	7.8738	7.92871		CCDC93	2.36112	2.45397	2.05623
CCDC14	5.91381	5.27205	4.93939		CCDC96	3.03417	4.31259	3.93936
CCDC141	0.00587234	0	0		CCDC97	4.70293	4.42096	3.78675
CCDC142	2.26535	2.05433	1.84282		CCDC9B	0.0669739	0.0873785	0.0438335
CCDC144A	0.148434	0.0965766	0.0832473		CCHCR1	1.43196	1.32443	1.2936
CCDC144B	0.19058	0.16787	0.333258		CCM2	1.25818	1.17533	0.857769
CCDC144CP	2.45607e-11	0.0133139	0.160949		CCNA2	128.353	111.67	92.488
CCDC144NL-AS1	0	0.0162905	0.00827167		CCNB1	53.3455	44.5523	36.6027
CCDC146	0.0874648	0.121074	0.112262		CCNB1IP1	4.06587	3.28379	2.2999
CCDC149	0	0	0		CCNB2	19.4924	17.9835	14.2668
CCDC15	1.48091	1.22285	1.14045		CCNC	8.94517	7.62273	6.48257
CCDC150	0.26099	0.466206	0.366248		CCND3	6.41598	6.05473	4.60158
CCDC153	0	0	0		CCNDBP1	15.2329	12.6287	10.0648
CCDC154	0	0	0		CCNE1	1.62926	1.58579	1.29765
CCDC157	0.293537	0.098933	0.35164		CCNE2	15.6062	15.0814	12.9789
CCDC159	0.252189	0.84997	0.323686		CCNF	9.8997	8.65852	6.52638
CCDC15-DT	2.1386	1.12623	1.82994		CCNG1	28.495	23.8317	16.2805
CCDC162P	0	0	0		CCNG2	1.00612	0.859045	0.622751
CCDC163	2.29037	1.92986	1.24715		CCNH	1.77629	1.31563	1.27378
CCDC167	2.67073	2.50752	2.21997		CCNI	37.4183	30.9198	20.1444
CCDC168	0.522664	0.513792	0.894457		CCNJ	3.73782	2.807	2.40259
CCDC169	0	0	0		CCNJL	0.0579	0.0546781	0.0288722
CCDC169-SOHLH2	0	0	0		CCNK	4.07638	3.64442	2.8666
CCDC17	0.64467	0.543195	0		CCNL1	19.9317	18.7849	17.9885
CCDC170	0	0	0		CCNL2	7.25029	6.73332	5.23504
CCDC171	0.119561	0.090024	0.143662		CCNL2P1	0.657713	0.429047	1.1479
CCDC174	4.57804	3.59679	3.44087		CCNQ	2.23466	2.12658	1.91566
CCDC18	1.36179	1.15847	1.80388		CCNT1	11.1707	9.96355	7.41451
CCDC180	0.10658	0.0951343	0.168089		CCNT2	6.26197	5.37367	4.52021
CCDC181	0.235961	0.281661	0.336509		CCNT2-AS1	0.13943	0.118615	0.0959964
CCDC182	0	0	0		CCNY	0.774042	0.697496	0.542675
CCDC183-AS1	2.10297	2.43643	0.674795		CCNY-AS1	0.116673	0.152218	0.197265
CCDC186	2.93336	3.34998	2.94561		CCNYL1	1.6404	1.87324	1.79639
CCDC189	1.88726	1.5902	0.461394		CCNYL4	0.0149275	0.0161405	0.00369297
CCDC18-AS1	0.108027	0.0910228	0.171666		CCNYL6	1.25084	0.985264	1.34939
CCDC191	0.0979577	0.0471649	0.0598712		CCP110	17.9851	17.1316	15.394
CCDC194	0	0	0		CCPG1	2.33562	2.17524	1.71551
CCDC22	4.21227	4.85303	3.75143		CCR10	0.264097	0.480466	0.671884
CCDC24	0	0	0		CCR4	0.236999	0.382824	0.147726
CCDC25	10.3935	7.89835	8.02094		CCR5	0.119059	0.284776	0.103897
CCDC26	0.119576	0.102831	0.11814		CCR7	1.08907	1.05381	0.665262
CCDC28A	3.70599	3.06688	3.17111		CCR9	1.77821	1.54664	1.55175
CCDC28A-AS1	0.0267093	0.0450102	0.0685633		CCS	0.780124	0.861629	0.702385
CCDC28B	9.58607	8.97463	8.43038		CCSAP	13.5188	13.3494	11.1806
CCDC30	0	0.0112408	0.0114153		CCSER2	2.21211	1.90068	1.41796
CCDC32	1.38722	1.40863	0.852211		CCT2	54.6925	46.4285	36.1012
CCDC34	7.14638	5.92058	6.969		CCT3	30.1611	26.2149	20.4052
CCDC38	0.0171172	0	0.0292934		CCT4	26.0647	22.7386	17.5362
CCDC43	16.6464	18.2667	17.8214		CCT4P2	0.302479	0.526178	0.329947
CCDC47	28.5424	28.9929	29.9056		CCT5	59.2415	57.0212	52.0939
CCDC50	0	0	0		CCT5P1	1.38294	1.37654	0.776336
CCDC51	7.80088	5.12692	4.005		CCT6A	72.6192	67.5378	51.353
CCDC57	0.394995	0.342609	0.248519		CCT6B	0.0838269	0.103686	0.0627012
CCDC59	3.17448	3.17792	2.9264		CCT6P1	1.52454	1.18148	1.10506
CCDC6	3.85487	3.12779	2.72526		CCT6P2	0.800554	1.47476	0.524019
CCDC61	1.50111	1.09618	1.15601		CCT6P3	0.750914	0.694064	0.651498
CCDC62	0.732328	0.740466	1.0235		CCT7	18.1098	18.0917	16.222
CCDC65	0	0.0786263	0.0399233		CCT8	28.5303	28.5253	24.4543
CCDC66	0.880213	0.96079	0.633351		CCT8P1	6.7356	4.96096	5.63733
CCDC69	0.0300603	0.0759857	0		CCZ1	6.91161	6.25306	4.55877
CCDC7	0.225155	0.257112	0.253498		CCZ1B	9.64925	9.04925	8.72821
CCDC71	21.1269	20.6726	18.3693		CD101	0.0190296	0.020318	0.00934086
CCDC71L	11.0374	8.33799	10.5843		CD109	0.450917	0.396302	0.317712
CCDC73	0	0	0		CD151	0.802964	0.702691	0.34487
CCDC74A	2.51171	3.98807	1.59104		CD160	0.215232	0.133312	0.186758
CCDC74B	1.63014	0.574263	0.830875		CD164	48.3672	39.9574	29.5178
CCDC77	2.08491	1.92014	1.74251		CD180	0.259572	0.233833	0.234605
CCDC78	0	0	0		CD1A	12.5304	9.64824	8.06817
CCDC81	0.0267469	0	0.0228866		CD1B	140.003	130.474	103.568
CCDC82	7.6266	7.92556	7.42318		CD1C	1.24785	1.48522	0.859686
CCDC85B	72.5525	72.4531	49.435		CD1D	1.25218	1.02311	0.960266
CCDC85C	1.11949	1.01664	0.94727		CD1E	45.7148	38.4618	28.125
CCDC86	14.4258	15.8016	13.7016		CD2	1.80862	1.34837	1.09917
CCDC88A	7.61298	6.81917	7.69633		CD226	0.0414651	0.0350046	0.0223492
CCDC88B	1.41845	0.629042	0.830447		CD244	0.35052	0.372624	0.259149
CCDC88C	0.874214	0.840773	0.695148		CD247	3.7636	3.61852	2.99666
CCDC9	1.31415	0.799713	1.24942		CD248	1.37408	1.90136	0.490537
CCDC90B	11.2278	10.9375	10.0938		CD27	0.0581324	0.131016	0.137046
CCDC91	0.759116	0.732044	0.679191		CD274	0.214411	0.124326	0.180175
CCDC92	1.8152	1.5496	1.32841		CD27-AS1	0.184246	0.249279	0.147515
CCDC93	3.39673	3.10517	2.7045		CD28	1.00202	0.824539	0.767253
CCDC96	1.20191	4.05088	2.5711		CD2AP	1.81103	1.7124	1.48086
CCDC97	10.7366	9.26908	7.83158		CD2BP2	20.2676	21.1723	17.4413
CCDC9B	0.135966	0.114564	0		CD2BP2-DT	0.861766	0.499696	0.584903
CCER2	0	0	0.345218		CD300A	0.14724	0.0753328	0.0831397
CCHCR1	3.19369	2.96698	3.22324		CD302	0.517876	0.651463	0.653002
CCL2	0	0	0		CD320	2.96573	3.02426	1.86497
CCL20	0	0	0		CD37	0.312222	0.729827	0.431401
CCL22	0	0	0		CD38	36.5485	32.2045	24.2658
CCL23	0	0	0		CD3D	149.371	138.617	116.753
CCL24	0	0	0		CD3E	96.6213	81.4566	56.9337
CCL28	0	0	0		CD3G	142.509	123.608	89.2745
CCL3	0	0	0		CD4	0.502281	0.39196	0.315422
CCL3L1	0	0	0		CD44	3.2711	2.91478	2.09182
CCL4	0	0	0		CD46	8.85741	7.70399	6.29294
CCL4L2	0	0	0		CD47	10.5194	9.41076	7.43205
CCL5	0	0	0		CD48	0.992934	0.895595	0.616583
CCM2	2.48705	2.39292	2.1281		CD5	0.257553	0.273187	0.158972
CCN1	0	0	0		CD52	0.310466	0.432057	0.270927
CCN3	0	0	0		CD53	3.08848	2.52714	1.95
CCNA1	0	0	0		CD55	0.0561429	0.072186	0.0724244
CCNA2	212.86	197.524	185.263		CD58	1.26887	1.04232	0.856296
CCNB1	77.3215	78.6908	69.5499		CD59	0.423677	0.33538	0.282483
CCNB1IP1	18.2773	13.5622	11.452		CD6	0.0327182	0.0369947	0.0371169
CCNB2	28.5792	25.8318	24.232		CD63	10.937	9.44951	7.03919
CCNC	21.7771	20.4522	18.7597		CD68	1.06837	1.46662	1.14788
CCND1	0	0	0		CD69	3.72959	2.58524	2.03207
CCND2	0.0363616	0.030638	0.124454		CD7	42.0272	38.0709	33.682
CCND3	11.9271	10.4651	9.02575		CD70	0.18278	0.198722	0.106335
CCNDBP1	32.4	27.4808	19.1863		CD72	0.973325	0.947144	0.78142
CCNE1	3.25511	2.65426	2.24621		CD74	0.0743268	0.0862825	0.150765
CCNE2	25.3276	24.0489	16.7616		CD79A	100.019	91.3957	73.2217
CCNF	16.0738	17.0962	13.6036		CD79B	3.63223	3.81419	2.43523
CCNG1	60.4492	49.5368	42.1794		CD81	5.71372	5.42678	3.91155
CCNG2	0.735512	0.694737	0.685477		CD81-AS1	0.0194132	0.014071	0.0254114
CCNH	1.99865	1.75326	1.27679		CD82	0.713782	0.633767	0.496488
CCNI	107.13	96.1748	80.4276		CD83	2.46334	2.02274	1.83142
CCNJ	7.10705	6.67452	6.33469		CD84	0.75473	0.789899	0.582619
CCNJL	0.0940359	0.101872	0.0574742		CD8A	0.0602841	0.00582597	0.0409164
CCNK	8.81364	6.47527	7.08951		CD8B	0.0171007	0.0163744	0.0149229
CCNL1	24.6915	21.1109	22.2153		CD93	1.92158	1.63155	0.858394
CCNL2	7.40701	5.681	5.60667		CD96	2.11552	1.79545	1.25945
CCNQ	7.68562	6.5658	5.66299		CD99	69.3401	69.5419	48.2399
CCNT1	20.3092	17.1507	18.4254		CD99L2	0.632604	0.579514	0.433447
CCNT2	6.89292	6.6831	7.83716		CD99P1	0.984963	1.11428	1.11216
CCNT2-AS1	0.225943	0.202276	0.163125		CDADC1	0.821817	0.836463	0.756829
CCNY	1.48995	1.30899	1.24431		CDAN1	3.0841	2.63131	2.35401
CCNY-AS1	0.236861	0.199578	0.152007		CDC123	7.30155	6.67882	5.59908
CCNYL1	1.87776	2.25408	2.11298		CDC14A	0.356317	0.315468	0.257015
CCP110	31.7368	30.3875	27.7545		CDC16	3.81094	3.51245	2.91037
CCPG1	4.36455	3.58202	3.57295		CDC20	46.8121	40.1523	26.1649
CCR1	0	0	0.167668		CDC20P1	2.64483	2.72081	1.69668
CCR10	0	0	0		CDC23	8.40247	8.05259	6.17979
CCR2	0	0	0		CDC25A	4.76382	4.46254	3.13453
CCR3	0	0	0		CDC25B	20.182	18.8286	14.3063
[truncated: 13,871 more rows]

## Sheet: MOLM13 H3K79me2 top 5%
gene_name	Length
JMJD1C	471096
RPL35AP31	335266
RNU6-1188P	286191
ARID1B	279616
ZNF521	275346
JARID2	273561
FAF1	265823
FOXP1	262208
MLLT10	252484
EFNA5	251585
MBNL1	250327
TCF12	244693
CDK6	237442
GNAQ	222163
PBX3	218832
MRPL1	214074
AC137932.1	208424
SATB2	204043
RREB1	202099
ETV6	190438
C4orf36	174290
IGF2BP2	165552
BCL2	159165
CHST11	156147
AC132807.2	151914
MEF2C	151141
CHST11	150139
PVT1	149355
NCAM2	148405
FOXP2	148349
MEIS1	146231
NIPBL	145526
POU2F1	145319
TBL1XR1	144503
AC008875.1	142824
WNK1	142801
PARP8	141179
AL139125.2	141055
CAHM	140876
FAM72A	140065
ELF1	138374
LINC00908	137430
CTBP2	135255
KCNN2	135084
SRGAP2B	133088
SRGAP2C	132551
ZEB2	130222
IGF1R	130218
NFIA	129778
RN7SL65P	126859
FAM53B-AS1	126808
KAT6B	126292
TAOK3	126117
PIP4K2A	125365
ARID2	125193
INPP5A	125084
ADGRL3	124900
PITPNC1	124476
STAG1	124287
AKT3	123423
DIP2B	122666
SENP6	119412
DYRK1A	117464
C9orf66	116867
CCNY	116415
CCDC144NL-AS1	115753
KANSL1-AS1	114264
CDK13	114209
CRADD	113886
ASH1L	113145
ZFAND3	112606
PLEKHA8P1	112140
ZNRF1	111828
RNF220	111295
ABR	110820
HMGA2	110505
GALNT7	110470
RSRC1	109976
AC092171.3	109271
TPD52	108674
HDAC4	108474
TNS3	108137
FABP5P3	108074
AC127502.2	107834
MAP3K20	107356
PPP1R12A	107171
EIF3H	106272
GOLGA8N	106050
EFCAB2	105968
BCOR	105668
GALNT2	105644
EPB41L2	105483
HOXA11-AS1_3	104702
ARRDC1-AS1	104639
SPRTN	104546
ANKRD17	104530
BCL11A	102504
NRIP1	102490
SDC2	102087
GSE1	102019
CAPZB	100511
PTEN	99629
KDM6A	99083
LYST	98978
LRCH1	97881
CHD7	97770
TNPO1	97629
PPP6R3	97577
NUDT3	97257
RXRA	96322
FBXW11	96261
ZMIZ1	96084
SATB1	96033
AC073592.3	95608
PACSIN2	95201
CELF2	94885
AC092910.2	94787
AL356776.1	94071
BBIP1	93576
GATAD2B	93476
WDR27	93453
TRAF3IP2-AS1	93424
ABI1	92963
BRD4	91993
RPL23AP11	91679
ELF2	91391
FLJ20021	91266
FAM193A	91204
EPB41L3	91194
NR3C1	91108
AAK1	91106
OGFRP1	90948
CREBBP	90565
ADIPOR2	89786
FAM72C	89722
ERBIN	87878
RASA3	87697
PPARGC1B	87251
GRB2	86810
APBA2	86576
BAZ2B	86439
MIR3140	86266
RN7SKP37	85974
DLEU1	85357
PAN3	85020
GGPS1	84810
HIPK3	84764
AP3M1	84279
NCAM1	84134
WAC	83947
CDC42SE2	83874
RALY	83765
NACC2	83628
GATAD2A	83333
PUM1	83278
GPR27	83138
THOC7	83117
UBE2E1	82870
IKZF1	82735
RANBP9	82464
CNOT2	82234
SMURF1	82181
EEF1A1P25	81821
AL158801.1	81610
AC100771.2	81295
CLIC4	81220
RPTOR	80860
Y_RNA	80750
MIR626	80445
MEMO1	80321
AHRR	80194
hsa-mir-550a-1	80015
UBE3A	79593
PIAS1	79139
RUNX2	79009
SCAF11	78735
TLK1	78665
AC078962.4	78513
PAFAH1B1	78504
FAM120AOS	78349
LCOR	78246
SYNPO2	78155
CBFA2T3	78121
SKI	78112
E2F3	78045
PLCG2	77694
UCK2	77678
MIRLET7BHG	77546
TBC1D5	77324
CNST	77211
ADK	77082
CDK17	76422
SPEN	76344
RPRD2	76193
RAB10	75949
C18orf25	75873
WHAMMP3	75823
AC017083.1	75725
ABHD17B	75677
SLMAP	75480
NFIC	75140
GNB1	75138
CHSY1	75101
RFWD2	74999
ATP11A	74754
FNDC3B	74735
CBWD1	74577
OSBPL8	74360
INSR	73982
TMEM131	73886
TLE4	73603
FOXK1	73566
HAUS8	73437
MAPKAP1	73416
BRAF	73202
PIK3AP1	73136
RICTOR	72993
STK10	72890
AC138649.3	72789
FLI1	72767
SDHDP2	72572
Y_RNA	72416
VKORC1L1	72328
PDS5B	72106
CUL3	72080
TET3	72066
RAB7A	71642
GBF1	71639
NCK1	71414
KAT6A	71290
AP002986.1	71061
PDCD6IPP2	70953
CPEB2	70951
RNU6-155P	70699
AC016727.1	70584
AL049830.4	70567
SDCCAG8	70523
PTK2B	70475
SEPTIN2	70284
AC091046.2	70122
FRYL	70007
RTN4	69830
ARID1A	69803
ATXN10	69618
UHRF2	69549
SH3KBP1	69465
FBXO11	69443
LRRC8D	69295
RUNX1	69130
AC008937.2	69063
VGLL4	69035
MBP	68845
RBPJ	68652
PPP2R2A	68314
UBE2W	68116
GAB2	67862
TBCA	67816
PIK3CD	67506
RAI1	67037
OSBPL8	66990
LYN	66878
AL390754.1	66822
INPP5D	66788
BAZ1A	66787
BAHCC1	66715
CCDC88C	66496
STT3B	66478
BUB3	66423
YY1	66366
MYH9	66318
ZRANB1	66149
NBPF19	66086
AC239799.1	66016
RUNX1	65936
SPRED2	65926
ASF1A	65834
KCMF1	65733
ARIH1	65635
GPBP1	65586
AC025178.1	65535
TEX2	65369
MIR7854	65092
ATP2B1	65024
PDSS2	64996
NOTCH2	64944
ARRB1	64868
CELF1	64848
FNBP1	64774
NBPF14	64479
TBC1D14	64315
SEPTIN9	64230
TRIP12	64168
MIR591	63955
ZNF292	63954
PSPC1	63713
URI1	63579
RNU4-89P	63537
RPS29	63358
PPP4R2	63209
KMT2E	63054
YDJC	62865
ADCY9	62805
USP10	62608
ZCCHC8	62588
SMC4	62512
SFMBT1	62231
NDUFC1	62222
FRS2	62201
NBPF26	62128
AC010442.1	61958
FAM35A	61887
AC135507.2	61872
SOCS2	61862
ZFAND6	61821
AC127024.2	61803
ERICD	61627
SEPTIN7	61627
NFATC3	61611
STAG2	61595
RNU6-151P	61260
USP15	61249
AC008764.7	61023
PIGL	61019
ARHGAP35	60947
RAPGEF1	60916
TBCE	60913
LRRC8C	60810
GPX1	60780
LUZP1	60771
UBE2K	60755
KCNQ5	60738
RNU6-1034P	60636
ACAP2	60484
MARCHF5	60484
MSN	60475
AC009961.1	60462
MIR8066	60388
RYBP	60301
RN7SL503P	60259
SELENOF	60214
SLC7A1	60013
KDM2A	59872
FOXP2	59743
RAB2A	59704
UBE2G1	59690
SCAF8	59593
CDYL	59439
AP003086.2	59329
AC011471.3	59279
RN7SL719P	59132
PDE7A	58987
AC009403.2	58853
CCDC12	58536
CEP85L	58486
B4GALT5	58380
AL138724.1	58310
RNMT	58296
AAMDC	58082
SAFB	57956
AC093414.1	57809
AP006259.1	57782
THRAP3	57763
IRAK3	57620
FNIP1	57617
USP12	57616
CTDSPL2	57551
SMURF2	57541
EPC1	57482
STK24-AS1	57418
ELL	57324
PKN2	57049
NSD1	57031
CDYL	56989
MARK2	56892
MNAT1	56892
HNRNPC	56755
IGF2BP3	56671
CHCHD3	56579
YES1	56472
SP3	56455
RTN3	56406
CHAF1A	56231
TNRC6B	56113
AP000936.3	56107
FOXN3	56073
ZFX	56022
MIR7852	56020
LRRFIP1	55887
FAM172A	55882
CORO1C	55866
RNU6-142P	55855
ELOCP33	55844
RNU6-268P	55813
BAZ1B	55763
AL031733.2	55607
SPPL3	55581
YWHAE	55421
CHD6	55360
SNRK	55342
WAPL	55266
BCAT1	55239
APBB1IP	54941
AC108688.1	54935
ATP2A2	54785
CCDC6	54698
SUMO2P8	54580
PUM2	54511
RPTOR	54219
ACTN4	54197
NEK6	54143
RAF1	53910
HDAC9	53908
PRR13P1	53838
SCMH1	53709
UCHL5	53708
ZMYND11	53682
TDGF1P6	53663
NT5C2	53622
EZH2	53568
ACTN1-AS1	53439
NCK2	53385
WASF2	53381
TAB2	53293
ECHDC1	53247
UBR5	53206
SPOP	53188
PPFIA1	52908
Z98885.3	52902
STXBP5	52873
UBE2D2	52836
AC135983.5	52783
AC027682.4	52761
BBIP1P1	52702
ELOVL5	52680
FAM107B	52640
LSM5	52539
ZNF638	52517
APTR	52475
TNPO3	52461
EIF4G3	52441
SBNO2	52354
HMGB3P21	52243
PHF3	52177
LINC00997	52000
TAX1BP1	51963
APOLD1	51962
TAF4	51904
APLP2	51896
WBP1L	51788
MIR3680-2	51779
ZNF131	51758
MFSD14B	51558
MPP6	51491
MAP3K5	51454
ARL8B	51450
C6orf106	51402
TMEM131L	51340
RUNX1	51305
RPL4P6	51260
ANXA4	50976
ROCK2	50844
WNT7B	50738
PTPRJ	50698
AC068620.4	50652
USP32	50644
PDZD8	50593
TMEM123	50455
DAP3	50448
DHX15	50434
ATP6V0E1	50374
XPO4	50246
SLC22A15	50199
ATP8B4	50178
ZMYND8	50164
RANBP3	50100
FOXN2	50082
VAPB	50067
NFYC	50014
RAB3GAP2	49969
TFDP1	49909
KATNBL1P1	49908
PDLIM1	49836
TRIM33	49731
MLXIP	49719
NCOA3	49647
TTC39C	49598
ANKRD18B	49565
NFATC1	49556
RPRD1B	49548
WIPF1	49531
MAPK1	49530
SNORA19	49503
SPOPL	49474
AC027601.4	49473
MZT1P1	49470
AC026124.2	49174
AL356020.1	48906
KLF13	48847
RNF38	48814
RNA5S16	48736
AC096667.1	48597
GSEC	48575
ADGRL3	48460
EMB	48409
MFSD14C	48348
PPP2R5A	48323
DOT1L	48221
GLG1	48190
INPP4A	48175
CDC123	48139
KIAA0232	47979
RBMS2P1	47840
MKLN1-AS	47824
HSF1	47816
ATXN2	47784
GOLIM4	47716
USP31	47673
MTDH	47499
MIR4439	47488
SH2D7	47429
POLK	47358
KCNQ5	47337
UBE2O	47328
FAM49B	47263
AL606517.1	47218
MIR3975	47122
TRAPPC12	47084
LARP4B	47062
ARHGAP12	47059
AL136301.1	47013
GOLGA8Q	46962
CLASP1	46951
KPNA6	46935
PTBP3	46896
AC090114.3	46845
EP300	46838
MTPN	46759
RBM4	46731
ZNF592	46629
ELF2	46622
NDUFV2-AS1	46617
SCARB1	46592
DNAJB6	46543
GRB10	46475
SLC25A13	46395
SRSF11	46391
ATG5	46348
CHD2	46335
CDK8	46334
GNA13	46322
DIS3L2	46301
PDCD6	46301
TRERF1	46243
GRAMD4	46232
AC016831.5	46084
FLNB	46059
PHC3	46035
EPC2	45993
SOS1	45849
PRDM2	45846
TSNAX	45740
ZNF124	45627
BCL2L11	45516
MAPKAPK2	45490
COMMD3	45483
RN7SKP9	45456
PHTF2	45360
AC008026.1	45344
RAP1B	45295
YTHDF3	45287
N4BP1	45267
AC104763.2	45254
MAPK14	45180
PPP2R5E	45151
ZNF644	45125
TSHZ1	45120
FOXK2	45099
LARP1	44930
TNFAIP8	44917
ZZZ3	44887
SMG7	44833
SMARCC1	44725
DMGDH	44716
BTF3L4	44691
ARHGEF18	44688
AL353748.2	44673
MED15	44623
SPRED1	44600
MAP3K4	44576
MXI1	44539
MAP3K2	44492
ZMYM2	44439
KIF9-AS1	44428
EXOC6	44423
HECTD4	44412
MAP2K1	44404
PRRC2B	44400
RBMS1	44323
RN7SL413P	44301
NIPA1	44127
AC138028.1	44087
CLASP1	44085
ARID3A	44061
CRKL	44039
FOXP2	44037
AC138409.2	44026
BMPR1A	44015
AC013429.2	43937
B3GNTL1	43908
COA1	43887
PPP4R3B	43816
PHF2	43725
LUC7L2	43715
BTBD7	43701
C22orf34	43692
EIF3E	43661
Y_RNA	43514
PTPN2	43489
CRTC1	43405
ST7L	43402
PPP1R37	43386
AC090796.1	43383
AC013437.1	43323
ANKHD1	43294
TRIM71	43288
SLC38A1	43283
HNRNPA1	43261
PJA2	43220
AC021237.1	43192
CAPRIN1	43148
PIWIL4	43123
SMAD2	43056
MIR3155A	43042
TAF11	42999
MEIS2	42823
LSM1	42807
AGPS	42779
IGF2R	42760
UBQLN1	42714
STK24	42695
PPTC7	42681
METAP1	42618
AXIN1	42591
MPC2	42580
ATG4B	42579
LAMC1	42554
ESYT2	42511
PITPNM2	42510
INTS6	42492
SINHCAF	42478
TEC	42448
KIAA0930	42422
DNAJB1	42388
USP47	42387
DENND4A	42322
POLR3C	42295
APP	42282
ERH	42269
PGS1	42268
ABL1	42210
XPO1	42175
BZW2	42052
PTPRC	41982
SH2B3	41978
WDR33	41974
PTPN9	41909
ZNF267	41849
KIF2A	41844
FTH1P25	41828
HNRNPM	41775
REPS1	41765
ROCK1	41750
REXO1	41738
AC118555.1	41718
AC242842.1	41673
NPTN	41561
CUX1	41543
CLINT1	41541
CSNK1A1	41524
UBAP1	41516
MAP4K4	41450
BPTF	41440
CHCHD3	41412
GPATCH8	41394
RBPMSLP	41377
SON	41366
UBASH3B	41348
GCNT1	41339
MIR5690	41320
NDUFS4	41311
AC007448.2	41293
MARCHF6	41221
DNM2	41192
SCAP	41175
AGPAT5	41136
ANP32A	41131
AL133467.1	41130
WDR20	41125
CNOT1	41117
EIF4E	41101
PPFIBP1	41082
POLR1D	41074
CDC42	41001
AC011676.3	40994
LINC00623	40927
RABEP1	40880
ZDHHC17	40876
NF1	40833
IL6R	40821
ZNF654	40821
NR2F1-AS1	40811
XPO6	40799
SF3B3	40755
C8orf44-SGK3	40705
C12orf65	40704
MRPL42	40641
TBC1D15	40600
NKAPP1	40570
FGD4	40539
RCL1	40515
FAM208B	40507
NLRP3	40436
AGAP1	40435
PIAS2	40432
ERP44	40421
STAT3	40412
CEP350	40402
DLX6-AS1	40400
PRRC2C	40400
RAB1A	40398
LARP4B	40353
SNX10	40352
TBC1D12	40332
MOB1B	40328
USP24	40311
MYB	40246
FAM60BP	40245
ARAP1	40225
NSD2	40216
ERVFRD-1	40214
PHF5A	40211
AGPAT3	40167
RSRC1	40161
USP7	40151
Y_RNA	40124
LMNB1	40070
AC008667.1	40046
SF3A2	39969
BMP2K	39964
PCNX1	39942
PREX1	39925
AP000721.2	39903
SETD5	39902
snoU13	39819
ONECUT2	39758
UBAP2	39717
ACSL4	39653
ERLIN1	39645
ACTR2	39637
SOCS5	39580
XPO7	39576
AC092139.3	39438
AC025569.1	39415
FAM168B	39393
MECP2	39391
PTPN1	39309
USP3	39302
RALBP1	39300
FAM126B	39278
VRK1	39272
NDFIP2	39220
ATAD2B	39213
CBFB	39208
MTF2	39188
MAML1	39165
RBM39	39144
RAB27A	39107
UHRF1BP1L	39103
ZBTB40	39071
SPTBN1	39054
CBX3P2	39039
HRH2	39036
AC004453.1	39034
WDR4	39005
CTSC	38999
AC026691.1	38995
GID8	38988
PPP2R2D	38949
CMSS1	38939
MAD1L1	38917
UBE2N	38844
TACC3	38837
IP6K1	38756
AL391863.2	38748
USP9X	38701
CRTC3-AS1	38644
ARHGAP17	38624
AC110769.2	38603
PDE3B	38589
THSD7A	38580
MEF2D	38538
DDX42	38531
PRR11	38520
UBR2	38454
MAP4K4	38440
TNFAIP8	38434
AL133342.1	38406
CSNK1G2	38366
PAK4	38358
AL589655.1	38339
KLHL8	38322
YWHAQ	38303
GOLGA4	38292
PHACTR4	38281
MAPKAP1	38269
TNFRSF10B	38262
TOP1	38231
GIGYF2	38161
AC125603.1	38128
HMBOX1	38122
PICALM	38073
PTPN12	38044
DNAJC3-AS1	38032
COQ8A	37975
EXOSC7	37955
AC064847.1	37949
ZBED4	37919
AC104451.1	37913
SNX3	37886
PARGP1	37885
ZBTB8OS	37824
WDFY3	37820
CSNK2A1	37818
KDM2B	37784
UHRF1	37769
SEC63	37747
RC3H1-IT1	37722
P2RY8	37699
TAPT1	37686
AC005154.1	37675
TBC1D8	37663
ZNF341-AS1	37651
VOPP1	37582
MATR3	37534
TBC1D1	37531
LATS1	37502
TRERF1	37488
LYPLA1	37480
RNA5SP437	37384
VMP1	37327
DEK	37286
ZC3H12C	37266
DTL	37195
CD44	37185
KTN1	37170
RAB40C	37100
FXR1	37056
CYFIP1	37047
GAPVD1	37020
RET	37004
AC009299.2	36886
PFKP	36814
BICD2	36791
HSH2D	36782
ZC3H11A	36770
LRRC8D	36760
NSD3	36715
CCNT2	36714
AKAP10	36707
MRPS27	36706
ANXA11	36668
WASL	36653
QSER1	36645
RAP1GAP2	36645
ARID4A	36599
SND1	36587
NT5C3A	36568
PARVB	36536
RPRD1A	36483
MICU2	36457
FOXJ3	36448
ARMC8	36363
G3BP1	36324
SLC25A37	36302
COX10	36297
HERC1	36297
HSPA4	36285
AC032044.1	36277
SZRD1	36269
FAM49B	36259
UBA2	36202
VPS26A	36188
ZNF680	36188
PHACTR3	36185
BID	36183
RNF38	36160
AL157756.1	36141
R3HDM2	36131
SNX5	36039
PTPRA	36038
LRRC8B	36015
DENND5B	35988
SRSF9	35901
MIR3680-1	35857
SPAG9	35855
AC069431.1	35852
ZFR	35841
SLC3A2	35814
AL021453.1	35761
NCK2	35695
AL355483.1	35685
TMEM161B-AS1	35648
PTBP2	35626
USP48	35620
AL121983.2	35573
AC104984.6	35562
DGKD	35552
GTF2I	35540
KDM4C	35540
CNOT6	35534
KIAA0368	35457
ZFR	35407
AC084018.2	35379
SLX4IP	35309
MBD5	35256
TMPO	35229
SMAP2	35207
MIER1	35195
SNORA67	35157
PIGN	35155
MARK3	35132
LYRM4	35126
ERC1	35112
VAV2	35097
AL133343.1	35078
UBE3C	35060
Metazoa_SRP	35029
ATL2	34998
RPL11	34966
AL162430.2	34927
U2AF2	34884
RNASEH2B	34869
NAA50	34843
EIF5B	34786
NDST1	34759
CAMTA1	34756
FABP5P15	34745
TRUB1	34729
RBM6	34706
RAP1GDS1	34703
LINC00863	34685
ZC3H3	34668
MPRIP	34618
SNX13	34616
ITSN2	34615
EFR3A	34596
FOXP1	34585
AL354928.1	34571
MIR941-4	34566
TMEM175	34564
WDR37	34526
PPP4R3A	34521
HECTD1	34510
YARS	34499
PPM1D	34459
KDM1A	34453
RBM26	34409
SSH2	34400
RSBN1	34389
PTPRN2	34388
RAB20	34369
ACSL3	34304
RDX	34299
CUX1	34283
AP1G1	34268
SEPTIN9	34247
MIR103A2	34233
USP22	34220
CERS6	34219
MEF2A	34183
TSNAXIP1	34146
GOLGA8A	34130
AC096649.1	34129
EP400	34124
CSNK1G3	34104
CARM1	34101
SH3KBP1	34088
DIAPH1	34080
PPP1R12B	34079
RB1CC1	34060
ARHGEF2	34035
HNRNPR	34035
ETF1	34025
TP53BP2	33986
NRF1	33972
RNF111	33941
USPL1	33893
ZC3HAV1	33843
ATP5G2P3	33839
UBE2V2	33836
SPECC1L	33834
SRPK1	33798
LCORL	33771
PTER	33770
SLTM	33769
SMG1	33733
ULK4P2	33729
IPO7	33712
SH3KBP1	33687
DOCK2	33671
YWHAG	33659
SLC7A5	33642
AC132216.1	33611
AC091057.1	33601
KMT2A	33545
ANAPC10	33532
ADD1	33482
SMG1P5	33460
ABR	33456
AC092139.2	33379
METTL8	33344
DESI2	33343
ATP8B4	33338
AC137767.1	33302
SOCS6	33290
METTL16	33285
AC090970.1	33280
DLG1	33275
JADE1	33245
UPF2	33232
AC005229.4	33192
VPS13B	33117
RMND5A	33113
PPM1B	33111
TAF5L	33038
RNF138	33027
C1GALT1	33026
DUSP10	32968
KPNA4	32901
ADNP	32872
AKAP9	32865
DCAF7	32840
AC007391.1	32816
DRAM2	32780
SLC39A14	32760
TMEM30A	32747
FBXO5	32743
SKAP2	32713
C1orf35	32711
IREB2	32710
G3BP2	32687
AC022726.1	32686
ARHGAP11A	32673
TUBGCP3	32672
DNAJC2	32671
RFX7	32649
IRS2	32563
ATF7IP	32542
AC246817.1	32519
SPPL3	32505
MED20	32466
ANKRD28	32458
SNORD92	32456
AP3S1	32429
SUGP2	32422
YTHDF2	32421
ZBTB17	32418
PRPF4B	32413
AC091132.3	32400
MYCBP2	32381
UIMC1	32377
MRRF	32373
FRMD4B	32361
RPF2	32290
SERP1	32274
RNF13	32218
DDX21	32215
PPP2R5C	32208
SF3B1	32201
VPS37B	32198
TM9SF3	32191
CPB2-AS1	32189
MICAL3	32188
GON4L	32186
SIRPA	32183
CDC42SE2	32175
FOXO3	32103
AC016542.3	32094
BAZ2B	32076
AL157400.2	32070
HNRNPU	32064
AC243773.3	32054
CSTF3-AS1	32049
LCLAT1	32042
PHACTR3	32037
PRKY	32003
CDYL	31984
LPCAT1	31978
SESN1	31976
VPS37C	31971
SGK3	31949
NFIX	31940
EYA3	31935
MED13	31926
ZFP91-CNTF	31904
WTAP	31898
ZNF638	31890
PRR14L	31857
FUBP1	31852
AP2A2	31835
MIR4714	31830
Y_RNA	31821
CEP44	31813
TGFBRAP1	31812
BCLAF1	31811
DOCK8	31788
AC022384.1	31767
RNF34	31757
SH3BP2	31752
ADAR	31742
CKAP5	31739
C1orf43	31701
ANKMY1	31694
ZNF516	31681
PARP8	31677
LITAF	31670
B4GALT1-AS1	31645
BIRC6-AS1	31634
ILF3	31585
IPMK	31574
NFE2L2	31570
AC006028.1	31560
RHEB	31558
NKD2	31541
CACUL1	31507
NFIA-AS1	31478
CCNK	31458
PTPN11	31453
RASAL2	31444
SLC16A1-AS1	31423
HAT1	31376
WDFY1	31357
ZNF430	31353
CGAS	31348
OSBPL5	31306
SNX8	31278
MIR648	31270
TNRC6A	31253
TMX2	31245
NUP50-AS1	31228
AL357033.2	31210
FOXN3	31200
RARA	31198
EXOC5	31191
BBX	31173
SLAIN2	31171
PPP6C	31136
EML4	31121
RAPGEF6	31112
SCARNA20	31107
DGCR2	31098
SIAH1	31093
FOXJ3	31076
GABPB1	31050
AL391335.1	31032
ELAVL1	31023
TSC22D2	30993
DLG1	30979
AC000123.3	30971
COL4A3BP	30965
ARHGAP19	30964
TRIO	30927
CDCA7L	30899
PIGW	30886
PWWP2B	30870
UHRF1BP1	30869
AC009630.1	30855
AC244153.1	30852
TNS3	30849
MBP	30843
AGFG1	30829
SNORA72	30823
HNRNPK	30820
SYNCRIP	30810
AGAP1	30782
NT5C2	30775
APPBP2	30750
AP002770.1	30743
AC006504.5	30721
G2E3	30699
EPS15L1	30697
FOXP4	30697
CCNY	30659
MARK3	30623
SENP5	30594
HMG20A	30589
RNF4	30585
CLN6	30567
ITPK1	30565
POLR2B	30547
SLED1	30514
CAPZA2	30500
MDN1	30438
TMED5	30417
LMBRD2	30402
NCOA3	30393
CTDP1	30392
B3GNT2	30376
CDC42EP3	30374
MAPKAPK5-AS1	30365
EZR-AS1	30341
ZNF280D	30314
EEA1	30292
SND1	30279
SSU72	30240
R3HCC1L	30239
DPY19L2P3	30233
ARHGEF6	30209
LINC01759	30146
IST1	30119
AP3B1	30113
PIPOX	30100
ADGRL3	30096
CHCHD7	30090
MDM2	30082
CDK19	30053
MACF1	30052
AMOTL1	30025
LMBR1	29993
LONP1	29988
VAPA	29954
AC241585.2	29950
AC096861.1	29940
MOB4	29921
PTP4A2	29886
DCLRE1A	29868
AL354726.1	29865
KDM4B	29852
RPL12P49	29840
CLTC	29831
ATM	29829
CPNE1	29823
HIC2	29811
NAA25	29811
ZRANB3	29794
DDX6	29752
TRA2A	29736
MCM4	29698
PQLC1	29680
JPX	29665
TFCP2	29650
TGFBR1	29616
NCOA2	29614
AL355001.2	29568
DEPDC1B	29558
CDK12	29543
PHF20	29542
LINC02062	29520
FBXL20	29516
ZNF236	29516
TP73	29490
CLOCK	29483
MIR6866	29483
IZUMO4	29482
LIN54	29443
IPO11	29439
AKAP1	29424
NIPA2	29389
PCID2	29385
SNORA25	29374
POGZ	29355
SMARCA4	29325
ZFC3H1	29282
LAPTM4B	29252
AL136172.1	29152
CHKA	29139
PDE4A	29132
TMEM267	29107
AKT2	29093
GTF2F2	29089
MKL1	29066
FLRT1	29058
TMEM87A	29049
VCL	29037
RNF121	29036
RBM10	29024
RNF24	29010
USP13	28992
LARP4	28983
MORF4L1	28972
RPS15AP6	28937
DGKZ	28934
PARPBP	28933
MAPK8	28927
GNAI3	28926
ELF4	28889
RAC1	28862
TBC1D22A	28857
LSM12	28854
PI4KAP1	28835
VAV1	28829
NUFIP2	28819
AC245100.2	28806
NEIL3	28797
SCAF4	28796
DHX29	28757
EDEM3	28732
IDE	28730
UPF1	28705
CREB1	28698
RYK	28696
AK3P5	28692
PPHLN1	28677
AC018878.1	28674
AP003108.2	28674
PXT1	28655
HPCAL1	28609
PI4KA	28600
MAP4K5	28545
TBP	28544
AC007383.2	28531
NUP93	28518
C9orf147	28511
UBE2G2	28506
SIMC1	28485
EWSR1	28478
PI4KAP2	28472
RBM15-AS1	28443
AC016831.1	28423
AC069503.1	28419
PDE3B	28417
RIC1	28411
RNU6-1283P	28406
Z84478.1	28398
TMEM11	28388
AC246817.2	28360
PTGES3	28285
DUTP1	28277
EIF4EBP1	28252
PIP5K1A	28244
BORA	28237
ZNF670-ZNF695	28226
UBE2D1	28206
LINC00909	28188
WDHD1	28158
AL121952.1	28127
QRICH1	28106
CAMKK2	28090
AP3D1	28081
TMEM245	28079
RLF	28076
ZBTB10	28054
ST3GAL1	28053
AC009831.1	28024
CSNK1D	28016
ASB3	27998
AC010522.1	27958
FOXP1	27956
YAF2	27950
SPECC1	27905
NOP58	27896
POLR1A	27895
ABL1	27890
ZNF207	27882
NDUFA12	27871
BTAF1	27852
SIK3	27851
PANX1	27843
MIR3176	27793
MIR181A2HG	27780
AL512604.1	27764
DHX9	27753
KIAA1551	27753
ARL16	27748
PRCC	27717
ZNF398	27717
P2RY2	27716
ZNF565	27708
TCF3	27692
ANKLE2	27681
FKBP15	27649
NNT	27643
MCTP1	27633
PAPOLA	27621
EFHB	27609
ITPRIP	27609
UBE2E3	27602
C1orf131	27568
IGF2BP1	27539
FNDC3B	27528
KMT5B	27517
CYTH1	27497
DAZAP1	27492
FAM192A	27488
Y_RNA	27479
CMC2	27474
STARD7	27457
ACACA	27456
EIF4B	27441
ZNF718	27428
CFL1P1	27422
NFKB1	27392
SMS	27391
ANKFY1	27383
C3orf80	27356
SZRD1	27338
RN7SL288P	27337
LRP5L	27318
PRR4	27307
LRIG1	27277
ZNF567	27258
LIMD1	27255
ATP9B	27251
SEMA4D	27210
AL117332.1	27206
YWHAZ	27198
ZNF217	27192
CDK8	27191
MGRN1	27188
GFI1	27167
DCAKD	27129
GPN3	27128
RPSAP6	27113
KATNBL1	27112
GPBP1L1	27098
LINC00476	27047
ELMSAN1	27045
ATP13A3	27041
INTS13	27000
MGEA5	26997
SRRM1	26967
CHD8	26964
TPM3	26919
SOS2	26917
MIR4673	26911
ZNF451	26908
AC016065.1	26889
MANEA-AS1	26878
AFTPH	26836
THOC2	26828
ADCY7	26814
TRAP1	26814
REV1	26801
ANKRD27	26800
NASP	26795
RPLP0	26792
ATP1B3	26786
FAM45A	26786
GMPS	26779
DENND4C	26770
SLC23A2	26756
TRPM7	26752
RSU1	26736
AKAP2	26698
BANP	26653
SETD7	26640
CBL	26599
CPSF6	26593
PSMB7	26588
AHCTF1	26586
NUP35	26555
SEC24B-AS1	26551
SLC15A4	26543
SOBP	26542
FAF2	26515
SLC35F2	26514
PCGF3	26470
ATXN7	26444
CYCSP10	26441
FNDC3B	26441
AC114760.2	26424
SEC11A	26410
SEM1	26397
ADPGK	26393
TNFAIP8	26389
AEBP2	26368
GATAD2A	26355
PREP	26353
SNX18	26343
DCTN4	26331
AC119396.1	26320
ZCCHC14	26299
PCBP2	26294
LINS1	26263
ZCCHC11	26262
ATF7	26260
ZBTB7A	26242
PPP1CB	26241
AC010654.1	26231
AL359232.1	26226
WDFY4	26226
RANBP6	26224
AMBRA1	26222
RBM25	26202
ZNF736	26196
BACH1	26194
NSMAF	26188
TRMT1	26184
TMCO1	26157
ZFP36	26120
TMEM248	26118
TMEM120B	26093
DHRS7B	26077
TRAPPC10	26062
APTX	26058
TM9SF4	26041
RILPL2	26038
UBAC2	26035
AC012555.1	26013
SGSM3	26002
ACYP2	25997
OTUD4	25989
STAM2	25958
DGKH	25931
TRAF3	25915
COA1	25895
MIR181A1HG	25893
ZC3H12C	25881
AC130469.2	25876
FGFR1OP	25855
MARS	25852
TMBIM4	25851
MFSD14A	25846

## Sheet: MOLM13 RNA seq
gene_name	MOLM13 S1	MOLM13 S2		gene_name	MOLM13 S1	MOLM13 S2	MOLM13 S3
7SK	127.269	166.749		5_8S_rRNA	0	0	0
A1BG	2.64109	1.66209		7SK	33.3009	44.4082	29.1576
A1BG-AS1	1.97885	2.04118		7SK	0	0	0
A2M	0.0529158	0.0787642		7SK	0	0	0
A4GALT	0.0733974	0.00845812		A1BG	2.84226	3.17066	3.98215
AAAS	24.6095	24.1489		A1BG-AS1	3.66186	2.24449	2.84583
AACS	1.22337	1.54284		A2ML1	0	0	0
AAGAB	7.32656	7.09885		A4GALT	0	0	0
AAK1	0.823569	1.33173		AAAS	28.4464	29.7006	27.7392
AAMDC	0.4632	0.322042		AACS	1.50647	1.55404	1.50935
AAMP	175.806	157.212		AACSP1	0	0	0
AAR2	12.3185	14.2661		AAGAB	6.8672	6.77869	7.23031
AARS1	45.3107	45.7248		AAK1	2.58383	2.39735	2.39811
AARS2	31.9034	36.5619		AAMDC	0.490328	0.442268	0.441057
AARSD1	23.5266	19.1493		AAMP	189.386	180.087	182.622
AARSD1P1	0.521701	7.64798e-20		AAR2	11.8559	11.5534	11.6954
AASDH	1.86653	2.51694		AARS1	90.0699	86.0858	91.0652
AASDHPPT	18.6756	28.9617		AARS2	49.0377	46.5638	44.6566
AATBC	2.07555	2.04753		AARSD1	22.2328	23.1197	25.69
AATF	9.35013	7.86239		AARSD1P1	1.04351	2.422e-30	0
AATK	0.00960613	0.0132838		AASDH	2.24568	2.04408	1.9527
ABALON	0.0562688	0		AASDHPPT	26.2162	28.9673	27.3523
ABAT	0.091521	0.123418		AATBC	1.50159	1.26412	1.50731
ABCA1	0.0647644	0.836885		AATF	11.088	10.6415	10.2223
ABCA10	0.00548378	0.0139026		AATK	0.0354702	0.0490165	0.0669713
ABCA11P	0.0129661	0.0120023		ABALON	2.66893e-11	3.90523e-07	7.31497e-10
ABCA17P	0.933202	0.597598		ABAT	1.27514	0.96865	1.09454
ABCA2	23.046	37.8397		ABCA1	0.0860386	0.0548462	0.0792695
ABCA3	0.184887	0.209254		ABCA10	0	0	0
ABCA5	0.304709	0.431484		ABCA11P	0.000383901	0.0435806	0.0134421
ABCA6	0.0101667	0.033195		ABCA13	0.00102291	0.00113024	0.00294039
ABCA7	6.368	5.31194		ABCA17P	0	0.0184366	0.0159879
ABCB10	17.8364	30.7885		ABCA2	158.707	154.697	160.61
ABCB10P4	0.235447	0.16967		ABCA3	0	0.00829466	0.0431579
ABCB11	0.00184896	0.0106534		ABCA5	0	0	0
ABCB4	0.0843146	0.208428		ABCA6	0.0231167	0.0170282	0.0221499
ABCB6	1.5009	0.99583		ABCA7	7.84413	7.82574	7.38837
ABCB7	2.76399	3.68137		ABCA8	0	0	0
ABCB8	13.5778	11.4148		ABCB1	0	0	0
ABCB9	0.384575	0.390318		ABCB10	17.2349	17.8555	17.1011
ABCC1	1.0569	1.57519		ABCB10P1	0.0929361	0	0
ABCC10	5.8503	7.43193		ABCB10P3	0.131234	0	0
ABCC13	0.0456921	0.0390032		ABCB10P4	0	0	0
ABCC2	0.15613	0.236366		ABCB11	0	0	0.00402825
ABCC4	1.0984	1.9641		ABCB4	0	0.00683314	0
ABCC5	1.5471	2.29904		ABCB6	0.486707	0.365178	0.275044
ABCC6	0.057273	0.0957324		ABCB7	3.57544	3.52806	3.52744
ABCC8	0.00126876	0		ABCB8	12.2736	12.7	14.0256
ABCD1	5.86516	9.15854		ABCB9	0.577609	0.64296	0.645059
ABCD2	0.033764	0.0689746		ABCC1	0.95322	0.920205	0.944603
ABCD3	2.60874	4.01524		ABCC10	13.1755	11.7118	13.5753
ABCD4	12.0167	10.558		ABCC11	0.0473397	0.0224106	0.0317055
ABCE1	46.401	83.7519		ABCC13	0.096197	0.0255099	0.0442435
ABCF1	55.5991	55.0489		ABCC2	0.041765	0.107678	0.166743
ABCF2	64.9289	51.7979		ABCC3	0	0	0.00811769
ABCF2-H2BE1	19.6581	29.8951		ABCC4	1.38835	1.44234	1.45951
ABCF3	49.1173	44.7252		ABCC5	1.81351	1.87754	1.60437
ABCG1	0.00109762	0.00126487		ABCC6	0.295401	0.298273	0.233423
ABHD1	0.182938	0.0702708		ABCC9	0	0	0
ABHD10	21.0816	22.3091		ABCD1	3.54809	3.73114	3.54038
ABHD11	51.6961	44.1432		ABCD2	0.0418752	0.0154231	0.0401239
ABHD12	6.72817	6.51564		ABCD3	4.97249	5.31725	5.33685
ABHD13	9.93653	19.6785		ABCD4	4.97992	4.89181	4.53806
ABHD14A	11.623	9.81707		ABCE1	74.8572	74.6859	72.9355
ABHD14A-ACY1	1.9621	2.40347		ABCF1	62.598	63.0954	64.8291
ABHD14B	25.5269	23.7017		ABCF2	54.8008	49.6177	50.5581
ABHD15	25.8337	30.9297		ABCF2-H2BE1	17.121	20.629	18.2329
ABHD16A	27.1843	30.1003		ABCF3	51.1321	47.1376	48.6433
ABHD17A	108.102	111.646		ABCG2	0	0	0.00329788
ABHD17AP1	0.31655	0.323467		ABCG4	0	0	0
ABHD17AP3	0.255042	0.257053		ABHD1	0.207978	0.0766004	0
ABHD17AP4	0	0		ABHD10	17.1935	18.2482	18.0341
ABHD17AP6	0.472569	0.782145		ABHD11	58.4193	54.2137	60.8804
ABHD17B	3.60066	6.78725		ABHD12	3.99311	4.30011	3.84552
ABHD17C	0.366624	0.422487		ABHD13	14.8983	14.1536	15.2171
ABHD18	1.72422	2.6399		ABHD14A	9.31842	7.13668	10.6628
ABHD2	2.22366	4.68249		ABHD14A-ACY1	0.470636	0.689034	0.552221
ABHD3	3.70647	4.68113		ABHD14B	26.5369	26.4326	27.118
ABHD4	1.99447	2.81736		ABHD15	25.4674	25.2816	27.818
ABHD5	1.81433	2.58979		ABHD16A	24.8193	25.9475	24.6631
ABHD6	0.289046	0.176091		ABHD16B	0.000118793	0.0558863	4.83575
ABHD8	0.851621	0.558844		ABHD17A	163.045	157.183	159.724
ABI1	3.06847	4.21819		ABHD17AP1	0.616222	0.340057	0.147398
ABI2	1.13669	1.82745		ABHD17AP3	0.433354	0.159609	0.13841
ABI3	0.10027	0.038516		ABHD17AP4	0	0	0
ABITRAM	11.3729	14.4345		ABHD17AP6	0.876254	0.583759	0.821594
ABL1	2.05933	3.68869		ABHD17B	7.45277	7.6387	6.36569
ABL2	0.780373	1.45683		ABHD17C	1.02598	0.984854	1.16126
ABLIM1	0.0038135	0.00329593		ABHD18	3.1181	3.20743	2.86893
ABR	3.50854	5.23587		ABHD2	4.02196	4.45342	3.97964
ABRACL	66.2572	61.3248		ABHD3	3.65119	3.72475	3.20406
ABRAXAS1	2.42234	4.55255		ABHD4	2.92577	2.5503	2.89685
ABRAXAS2	8.29621	11.9256		ABHD5	1.94717	2.0664	2.27682
ABT1	170.982	154.676		ABHD6	0.368378	0.351528	0.352972
ABTB1	9.63341	6.80898		ABHD8	1.3039	0.764215	1.59089
ABTB2	0.176376	0.280141		ABI1	5.39027	5.27637	5.34439
ACAA1	12.3641	9.79519		ABI2	1.77332	1.74955	1.95629
ACAA2	12.1259	11.3459		ABITRAM	12.4231	14.0888	14.016
ACACA	1.40702	3.55256		ABL1	4.25722	3.86605	4.00168
ACACB	0.0409584	0.0537097		ABL2	1.54277	1.58909	1.47826
ACAD10	3.15716	3.34992		ABLIM1	0.00144516	0	0
ACAD11	0.781083	1.17617		ABLIM2	0.00503243	0.00834074	0.0120549
ACAD8	17.9916	19.2392		ABLIM3	0	0	0
ACAD9	11.398	12.3651		ABO	0	0	0
ACADM	9.21479	18.3572		ABR	6.0895	6.04819	6.10921
ACADS	11.9754	9.23192		ABRACL	80.745	86.8894	84.4191
ACADSB	2.01295	3.63841		ABRAXAS1	2.28791	2.52789	2.19369
ACADVL	306.011	263.661		ABRAXAS2	12.6735	13.1233	13.8974
ACAP1	13.0939	12.002		ABT1	169.216	161.256	160.784
ACAP2	1.54989	3.83166		ABT1P1	0	0	0
ACAP2-IT1	0.0530359	0.42782		ABTB1	5.78827	5.31848	4.37857
ACAP3	18.4434	16.5387		ABTB2	0.0846763	0.0753691	0.0585975
ACAT1	36.0501	32.888		ACAA1	8.17904	7.77553	8.41402
ACAT2	45.3597	58.1689		ACAA2	6.47933	6.12681	5.65061
ACBD3	4.16985	7.50118		ACACA	1.93511	1.86065	1.78604
ACBD4	2.06171	2.03493		ACACB	0.578046	0.631604	0.587718
ACBD5	1.77961	3.27794		ACAD10	3.92682	4.04355	3.97271
ACBD6	1.4242	1.26038		ACAD11	0.327335	0.207523	0.32173
ACBD7	0.0885487	0.222635		ACAD8	22.2742	22.5131	21.7975
ACCS	1.84771	2.04839		ACAD9	11.5464	11.1466	11.4628
ACD	82.254	64.4242		ACADM	16.0708	16.3334	17.3495
ACE	0.12054	0.190997		ACADS	12.4516	13.6447	13.6352
ACER2	0.224021	0.558864		ACADSB	4.94726	4.93176	4.86336
ACER3	0.673689	1.20689		ACADVL	222.062	204.524	211.572
ACIN1	41.2325	51.6982		ACAP1	14.9188	13.4249	14.0764
ACKR3	0	0		ACAP2	3.4633	3.67964	3.59568
ACLY	27.0609	50.68		ACAP2-IT1	0.482363	0	0
ACO1	1.91827	2.64845		ACAP3	18.8048	18.7658	18.4519
ACO2	15.1225	17.6312		ACAT1	30.9729	29.8187	29.451
ACOT1	6.08263	5.33717		ACAT2	38.5144	40.8796	38.7816
ACOT11	1.1665	1.42571		ACBD3	12.8616	13.2899	13.1667
ACOT13	8.28631	7.07325		ACBD4	2.90099	3.11248	1.97396
ACOT2	22.2048	24.8078		ACBD5	2.72039	2.74544	2.67549
ACOT4	0.164992	0.158443		ACBD6	2.31137	2.20691	2.13369
ACOT7	2.73866	2.47742		ACBD7	0.292855	0.404482	0.420912
ACOT8	11.0254	9.40117		ACCS	0.531803	0.352564	0.713387
ACOT9	2.01324	2.34451		ACD	100.661	98.5215	104.642
ACOX1	5.02839	7.18338		ACE	0	0	0
ACOX2	0.146557	0.134342		ACER2	0.391822	0.445306	0.353982
ACOX3	3.13867	2.93728		ACER3	0.572224	0.658208	0.669198
ACOXL	0.00137963	0.000317971		ACHE	0	0	0
ACP1	60.1044	72.0901		ACIN1	62.4402	56.7363	59.5524
ACP2	8.4058	8.40194		ACKR1	0	0	0
ACP3	2.60077	2.68935		ACKR2	0.0292555	0.0129301	0
ACP5	0.196973	0.0851199		ACKR4	0	0	0.0430068
ACP6	0.0523962	0.042266		ACLY	43.754	41.555	44.0503
ACRBP	3.19213	6.05178		ACO1	3.11597	2.71448	2.89257
ACSBG1	0.00273787	0.00473257		ACO2	17.3426	18.0248	17.4248
ACSF2	0.842332	0.676688		ACOT11	0.577688	0.638306	0.476515
ACSF3	4.35969	4.68841		ACOT13	12.3786	11.4667	12.3532
ACSL1	5.90843	9.06607		ACOT7	3.47793	3.74764	3.65702
ACSL3	6.08971	12.6068		ACOT8	8.90496	8.73211	8.35823
ACSL4	3.75704	9.18928		ACOT9	2.08411	1.85869	2.06827
ACSL5	8.24245	11.4948		ACOX1	4.96369	5.19889	4.68179
ACSL6	0.00687829	0.00792635		ACOX3	3.77431	3.6861	3.64154
ACSM3	0.184621	0.21868		ACOXL	0.0125478	0.0207967	0.0312599
ACSS1	6.26632	6.82107		ACOXL-AS1	0.0808745	0.0893608	0
ACSS2	3.8886	6.41993		ACP1	61.4192	58.4019	61.2916
ACSS3	0.00725299	0.0167163		ACP2	8.6185	7.84235	8.84098
ACTA1	0.0572618	0.0659869		ACP3	2.20861	2.11287	1.97882
ACTA2	0.484516	0.255497		ACP4	0	0	0
ACTA2-AS1	0	0.0146359		ACP5	0.111967	0	0
ACTB	1060.98	973.767		ACP6	0.2621	0.10531	0.251138
ACTBP11	0	0		ACRBP	3.74614	4.08173	2.89151
ACTBP15	0	0.116411		ACRV1	0.052063	0.115052	0.249428
ACTBP2	0.384519	0.439521		ACSBG1	1.36199e-27	2.9754e-29	2.43997e-29
ACTBP9	0	0		ACSBG2	0.0336707	0	0.0161313
ACTG1	2085.86	1909.02		ACSF2	1.36018	1.49186	1.58121
ACTG1P14	1.24067	1.42972		ACSF3	5.13792	5.71093	5.50679
ACTG1P17	0.27115	0.274591		ACSL1	10.3578	10.0698	10.4683
ACTG1P20	1.83042	10.283		ACSL3	7.37708	7.35406	7.46993
ACTG1P24	0.732585	0.984913		ACSL4	6.30314	6.57521	6.22332
ACTG1P25	0.0396944	0.0823369		ACSL5	11.9171	12.3842	11.9775
ACTG1P3	1.63407	1.66152		ACSL6	0.00781978	0	0
ACTL10	6.89963	4.44317		ACSM1	0	0	0
ACTL6A	22.7653	34.0818		ACSM2B	0	0	0
ACTL8	0.480678	0.40426		ACSM3	0.0187317	0.0244439	0.0270849
ACTN1	9.40438	15.9786		ACSS1	3.69241	3.61067	3.77679
ACTN2	0.26426	0.39662		ACSS2	2.04141	2.01463	1.95603
ACTN4	18.6274	27.6932		ACTA1	0	0	0
ACTR10	7.25472	7.06221		ACTA2	0.737998	0.541751	0.509535
ACTR1A	19.0934	19.9309		ACTB	1085.34	1034.75	1061.17
ACTR1B	47.6748	50.6311		ACTBP11	4.5074	7.62498	6.52618
ACTR2	79.4639	176.608		ACTBP2	40.1425	11.5191	27.5255
ACTR3	33.0019	49.2342		ACTBP4	0	0	0
ACTR3B	1.06066	1.11826		ACTBP8	0	0	0
ACTR3C	0.0332117	0.0624118		ACTG1	1938.29	1912.13	1925.81
ACTR5	6.6399	6.26696		ACTG1P1	0	0.953129	0.413269
ACTR6	4.57944	5.47632		ACTG1P10	0.900084	1.70327	5.37287e-05
ACTR8	14.1097	18.7789		ACTG1P14	1.30199	0.479538	0
ACTRT3	0.24327	0.186892		ACTG1P17	0.112096	0.123859	0
ACVR1	0.134537	0.170012		ACTG1P20	3.12145	11.4966	2.9909
ACVR1B	2.15669	3.92104		ACTG1P24	0	0	0
ACVR2A	0.0595506	0.0929291		ACTG1P25	0.144408	0.0797808	0.0691845
ACVR2B	1.12664	1.70068		ACTG1P3	0.437114	0.482982	0
ACVR2B-AS1	0.592691	0.552905		ACTL10	9.22828	10.8764	10.6108
ACVRL1	1.60092	1.87485		ACTL6A	40.6007	37.6089	38.154
ACY1	79.4192	69.7107		ACTL8	0.013577	0	0.00650459
ACY3	0.261936	0.135832		ACTN1	12.6045	13.1811	12.8836
ACYP1	4.82441	3.55445		ACTN2	0	0	0
ACYP2	0.0496238	0.0542336		ACTN4	62.416	56.9917	60.9822
ADA	7.98052	7.15582		ACTN4P1	0	0	0
ADA2	0.932695	1.66658		ACTR10	8.32643	9.10933	8.50309
ADAL	2.38821	2.907		ACTR1A	27.5002	27.7242	27.696
ADAM10	2.81962	5.25907		ACTR1B	56.1075	57.4813	50.365
ADAM11	0.0562122	0.0647774		ACTR2	199.804	203.914	198.617
ADAM12	0.000854137	0.00426523		ACTR3	44.3762	45.4857	44.5395
ADAM15	57.9157	56.018		ACTR3B	1.7109	1.63162	1.66863
ADAM17	3.2824	5.91425		ACTR3C	0	0	0
ADAM19	0.000594087	0		ACTR3P2	0	0	0
ADAM20P1	0.024791	0.00816243		ACTR5	6.31424	6.30596	6.96157
ADAM21	0.00247177	0		ACTR6	6.15176	6.29375	6.65858
ADAM22	0.0418362	0.106064		ACTR8	22.1735	24.4646	25.3283
ADAM28	0.0280287	0.0417994		ACVR1	0.17381	0.149797	0.226495
ADAM32	0.0643941	0.119978		ACVR1B	3.43373	3.41463	3.46491
ADAM8	2.14174	1.79341		ACVR1C	0.00476939	0	0
ADAM9	3.18209	7.73234		ACVR2A	0.137346	0.17016	0.0707981
ADAMDEC1	0.0147839	0.0397519		ACVR2B	0.657481	0.904663	0.71319
ADAMTS1	1.81886	2.58166		ACVR2B-AS1	0	0	0
ADAMTS10	0.30548	0.246823		ACVRL1	1.62769	1.37339	2.09839
ADAMTS13	0.028526	0.0301332		ACY1	79.5477	71.8994	76.9004
ADAMTS14	0.0214311	0.037045		ACYP1	2.24786	2.15256	2.03897
ADAMTS17	0.00982463	0.00599381		ACYP2	0.163412	0.151215	0.177522
ADAMTS2	0.00684625	0.00315577		ADA	4.22757	4.76987	4.33604
ADAMTS5	0.0566247	0.0652528		ADA2	0.753899	0.738193	0.657767
ADAMTS6	0.0102843	0.0329615		ADAL	2.85264	3.89494	3.04572
[truncated: 18,401 more rows]

## Sheet: Unique top 5%
MOLM-13		Loucy		DND-41		K562
[truncated: 922 more rows]

[truncated: 1 more sheets: Common top 5%]
