# Supplementary material for: Bioinformatic Analyses of Broad H3K79me2 Domains in Different Leukemia Cell Line Data Sets
Source: Cells. 2022 Sep 10;11(18):2830. doi: 10.3390/cells11182830 (PMC9496709; doi:10.3390/cells11182830)
Supplement: Supplementary file 1 [file cells-11-02830-s001.zip › Supplementary files/Table S3 H3K79me2 seq results from MV4-11 and THP-1.xlsx]

## Sheet: MVP-11 Top 5%
gene_name	Length
MED13L	11073
MTERF3	10416
AL132639.2	9937
DHX29	9678
FOXN2	9251
GMPS	9196
ELF1	8864
ABHD13	8834
SCAF8	8812
PPP2R2A	8687
G3BP1	8444
Metazoa_SRP	8434
ATL2	8376
MAP3K20	8343
YTHDF3	8286
NEK7	8221
UQCRH	8201
PHLPP1	8140
PAN3	8071
MED13L	8042
.	8025
TCERG1	7846
AC008040.1	7830
EIF3A	7806
MTDH	7797
PAN3	7727
MEF2C	7721
NRIP1	7705
PTPN12	7653
CSDE1	7591
GPBP1	7571
PPP6R3	7570
HNRNPU	7544
MEF2C	7522
AC023632.2	7520
PAPOLA	7428
LUC7L2	7385
AC090579.1	7362
ANKRD17	7336
AZIN1-AS1	7300
STKLD1	7244
AC019163.1	7196
ELF1	7136
SMC3	7075
KCNN2	7038
KCNN2	7022
TP53I13	7005
SRGN	7002
HIPK3	6985
PPP2R2A	6962
CUL4A	6961
YBX3	6926
QKI	6924
LINC01578	6911
UBE2W	6906
HSPE1-MOB4	6901
MED13L	6879
PTBP2	6851
CAND1	6811
RBBP6	6800
ELF1	6782
UBR5	6761
LCOR	6742
QKI	6729
FOXJ3	6724
EIF2A	6720
EIF3H	6711
TPP2	6696
ZNF124	6683
DLG1	6675
CSMD3	6638
EEA1	6600
MEF2C	6575
AFF1	6572
MED13L	6561
HNRNPH3	6533
PPP3R1	6512
PPP6R1	6508
ELF1	6505
MATR3	6468
RAD21	6455
TPR	6430
MBNL1	6425
SMIM3	6410
YBX1	6387
PIK3R1	6351
EDEM1	6344
API5	6320
HNRNPD	6305
AAMDC	6304
EZH2	6266
SATB1	6262
MAP3K20	6254
AL031428.1	6249
STT3B	6247
BAZ2B	6246
SNORA14B	6245
MTDH	6223
HIPK3	6222
CAB39	6215
ARL14EP	6211
C21orf62-AS1	6206
PKP4	6190
AC018926.2	6189
ZNF678	6171
NOP58	6156
AL031733.2	6153
PDIA6	6145
SMG7	6126
LRMP	6124
RNF24	6111
PARP8	6096
HP1BP3	6095
VAPA	6087
AL354726.1	6085
DDX10	6077
SATB1	6075
MED13L	6053
MTPAP	6044
PBX3	6027
RASA3	6024
USP7	6021
MIR155HG	6011
SUGT1	6001
AL136131.3	5993
DCTN6	5986
HIPK3	5978
ELF1	5977
ZNF516	5973
HNRNPR	5971
EIF3H	5960
SP3	5947
EIF3H	5933
IPO9-AS1	5930
LINC01138	5927
UBR5	5927
PDLIM1	5913
PDS5B	5913
MRPL44	5905
ANLN	5903
UNC5C	5903
FASTKD3	5887
ENTPD4	5875
AC068620.4	5864
PLEKHO2	5853
.	5845
TDG	5841
USP1	5832
ADGRL3	5819
ERP29	5795
CLINT1	5789
CPSF6	5782
PUM3	5782
AC018413.1	5774
MBNL1	5772
ADIPOR2	5769
AFDN	5760
PBX3	5742
PHLPP1	5739
HMMR	5736
PHLPP1	5732
AC040970.1	5726
EMB	5725
RUNX1	5720
CHAMP1	5680
LEPROTL1	5680
ADSS	5675
Z93241.1	5671
PUM1	5666
ATP11A	5664
BORA	5658
SGO2	5648
FLT3	5644
MBLAC2	5644
C11orf58	5639
SEPTIN7	5623
ARGLU1	5622
.	5619
ZFR	5607
AL139393.2	5599
SCAF4	5595
CDC7	5588
YTHDF3	5580
UBE2L3	5574
UHRF2	5571
CREG1	5570
CTBP2	5570
OTUD4	5562
MARCHIF7	5559
NIPBL	5557
BIRC6	5555
.	5548
MBNL1	5547
ELOC	5544
LINC01126	5541
ELF2	5533
NUP153	5526
JMJD1C	5523
HNRNPH1	5522
FOXK2	5508
FOXJ3	5498
MOB1A	5490
TEX41	5466
ABI1	5460
ATF2	5457
AC019131.1	5456
E2F3-IT1	5454
AL133342.1	5453
.	5450
AL136115.2	5450
ZFR	5449
XPO7	5447
AC010203.2	5444
ZNFX1	5438
GLUD1	5437
STK38L	5435
TTC28	5427
AC005670.1	5420
AC069236.1	5419
AFF1	5419
MFSD14B	5411
RNASEH2B-AS1	5408
AC073263.2	5401
AC008026.1	5399
APAF1	5394
PARP8	5393
IFFO1	5388
WDR27	5382
FOXN2	5374
PSMA6	5366
CRLF3	5358
JMJD1C	5354
CBFB	5353
.	5342
FEM1B	5337
EZH2	5333
ZNF148	5327
QKI	5321
ZZZ3	5315
AP3B1	5309
GNAQ	5302
LINC02256	5284
AFF1	5273
HSPA4	5271
PTPN12	5268
TNKS	5265
PDZD8	5264
PSMA2	5263
NASP	5262
PRPF40A	5261
ZBTB10	5256
CHD2	5253
ZFR	5248
UBQLN1	5246
RAF1	5241
JARID2	5240
FDFT1	5233
MICU2	5225
PPP3R1	5214
WSB1	5204
SLC16A1-AS1	5203
MBNL1	5202
PBX3	5200
APLP2	5197
SCLT1	5195
HSPA5	5193
PDE3B	5193
JARID2	5182
AL136311.1	5178
MBNL1	5178
PDE7A	5172
LYST	5171
GFPT1	5156
ZBED4	5154
CAAP1	5153
MIR181A1HG	5147
MTMR9	5147
NRIP1	5146
CEBPG	5143
STARD3NL	5143
DNAJB1	5142
MALAT1	5137
FRS2	5133
NSD3	5127
CHCHD3	5126
PDS5B	5126
BCLAF1	5123
THOC2	5112
PLEKHJ1	5106
XPNPEP3	5104
ACTR2	5102
SMIM3	5098
UGCG	5096
ZNF146	5093
YIF1B	5090
.	5087
AL512380.2	5085
CLTC	5085
HDGF	5081
NUFIP2	5081
SVBP	5073
RAD23B	5072
EED	5071
SRSF10	5071
FBL	5070
CLECL1	5066
XRN2	5057
N4BP2L1	5054
ATRN	5044
AL136115.1	5041
FUBP1	5037
MYCBP2	5031
NSRP1	5024
DLEU1	5020
AHR	5019
KLHL28	5019
U2SURP	5014
GLO1	5013
COX16	5011
SMARCC1	5008
USP3	5006
FOXP1-IT1	4998
ZNF207	4997
UBE2N	4996
NDUFV2	4988
AF117829.1	4985
CXXC5-AS1	4980
EWSR1	4980
IKZF1	4977
DEPDC1B	4970
IMPAD1	4968
TRAPPC10	4968
AC012291.1	4963
MYCBP2	4959
WHAMMP3	4957
UBR5	4956
CCR2	4953
NRIP1	4953
BAZ1A	4949
LIN54	4946
NAP1L1	4945
BAZ1B	4943
RANBP9	4941
PPM1D	4937
RNF38	4934
LINC-PINT	4933
PTBP3	4933
TBC1D5	4928
.	4924
SMAD2	4923
FAM120A	4922
NSMAF	4921
CHSY1	4919
MARK3	4918
AC091959.3	4917
CUL3	4908
FAM78A	4908
KANSL1	4908
TRAPPC10	4901
RBM26	4900
SETD2	4900
TBC1D5	4900
KAT6A	4899
MORF4L1	4899
DDX21	4897
RRNAD1	4892
SMURF1	4886
NFYC	4883
BCL11A	4882
MAN2A1	4881
SNHG1	4880
AL356599.1	4879
TAB2	4877
RP2	4876
POLD1	4870
EIF3H	4869
RALY	4869
ZFAND3	4866
ANKHD1	4865
UBE2N	4865
SEC31A	4862
MEMO1	4859
.	4858
ELOA	4858
C14orf178	4854
RTN4	4854
RAP2A	4852
HSF1	4846
TRAF7	4846
SFT2D2	4842
TNPO2	4842
SATB1	4837
WDR3	4828
DDX31	4827
FOXJ3	4823
NDUFC2-KCTD14	4821
C9orf85	4817
TM2D3	4817
ERC1	4814
RAB2A	4806
HCFC1-AS1	4804
ZNF516	4804
XPO4	4803
DEK	4798
TMA16	4794
MAP2K7	4793
.	4791
PUM1	4783
ARID2	4781
GZF1	4781
CEP76	4780
SNRNP25	4775
GORASP2	4771
.	4768
PARP4	4763
MED13L	4762
TARBP1	4762
LARP4	4760
KMT2A	4757
ERCC5	4753
FAXDC2	4749
RACGAP1	4749
SMARCC1	4748
RSBN1L	4746
IGF2BP2	4745
IRF2BP2	4744
MIR1281	4744
U2AF1L5	4744
CDK6	4743
MAP4K4	4740
CEBPZ	4736
AC005540.1	4733
ADGRG5	4726
KMT2D	4726
CANX	4725
PHLPP1	4716
ZNF321P	4716
ADCY9	4715
AP1G1	4715
WDFY4	4714
ARF4-AS1	4713
RAB3GAP1	4713
SLC7A1	4710
COPS5	4708
SLC25A40	4706
STK24	4703
QRICH1	4702
AC005514.1	4700
LINC01301	4700
PPP2R2A	4700
ZC3H3	4700
TRIQK	4698
AC092053.3	4696
MFSD11	4695
WNK1	4692
SGK3	4689
AC009908.1	4686
NAP1L4	4686
NSD3	4686
AC008622.2	4682
TM9SF3	4681
XPO4	4677
DCP2	4676
P4HA1	4675
GSK3B	4674
SUCO	4673
EGLN2	4671
RNU4-49P	4666
AP002449.1	4661
KCNAB2	4660
EIF3H	4657
MIR124-1	4654
CPB2-AS1	4653
GLO1	4653
CDK6	4651
STAG2	4650
PPP2R2A	4646
C20orf197	4644
EFCAB2	4644
UHRF1	4642
MOB4	4641
GBF1	4638
TMEM245	4638
AC009299.3	4635
LUC7L3	4630
TAF5L	4629
UNC5C	4629
GNA13	4626
PTBP1	4626
RPL36AL	4624
SRSF3	4624
ZFAND3	4623
INTS13	4622
MSH6	4616
SRFBP1	4616
TM9SF3	4616
JMJD1C	4611
NUCB2	4611
RPL9P32	4610
TEC	4609
UBE3C	4609
TXNL4A	4606
WDR43	4606
MEF2D	4605
NMI	4605
RSBN1L	4605
TNKS2-AS1	4604
RGS5	4603
C6orf62	4601
AC091959.3	4599
DOCK11	4598
MKKS	4597
AGTPBP1	4596
ARL5A	4596
EFR3A	4596
NIPBL	4596
RPAIN	4596
MRPL1	4593
COPS2	4592
MTHFD1L	4592
UBE2G1	4592
MEIS1	4591
SPN	4589
ADIPOR2	4588
DRAM2	4587
TAF1B	4585
PTRHD1	4583
ZCCHC14	4580
ATP5S	4576
KIFC1	4574
TBCAP3	4574
CBX3P2	4573
LCP1	4572
FLJ37453	4571
DIP2B	4569
MIR181A1HG	4565
NDFIP2	4564
ANP32E	4562
EMG1	4561
PLEC	4561
ZEB2	4560
LDB1	4558
TBK1	4558
Z83844.2	4558
WDHD1	4556
MAN1A2	4555
MEF2C	4552
ZNF148	4551
RNF111	4550
LMNB1	4549
UGP2	4549
USP42	4547
NUDCD1	4546
TPM3	4546
BID	4544
NHLRC3	4539
FOXP1	4538
ARID1B	4537
CENPA	4537
BRIX1	4536
WDR26	4536
ANKRD17	4535
RBM33	4534
PHLPP1	4533
ATP8B4	4530
SYK	4529
G3BP2	4524
MKLN1	4523
NCR3LG1	4523
ERBIN	4521
ZNF410	4521
CNBP	4519
VCPIP1	4519
GPR132	4518
FUNDC2	4517
RPIA	4517
.	4516
NT5C2	4514
ACBD5	4512
NET1	4512
RAP1A	4510
ZNF431	4508
NAA16	4506
TIA1	4506
UBXN4	4506
TOR1AIP2	4501
CLASP2	4500
PTGER4	4499
AL442067.1	4497
TMX1	4495
NIPBL	4493
CASP8	4492
COQ2	4492
FKRP	4490
CDKN1B	4489
BZW2	4488
CCDC127	4488
IGF2BP2	4487
ZNF638	4487
CGGBP1	4485
GPSM2	4485
ANKRD13B	4483
.	4480
PHGDH	4479
FAM91A1	4478
MSL2	4478
RSRC1	4478
RPS15A	4476
NEK7	4473
PPP2CB	4470
AC008440.1	4469
BORCS8-MEF2B	4467
TAB2	4465
NKRF	4463
AP005432.1	4461
ESCO2	4458
LAMTOR5-AS1	4458
ALG11	4457
CSMD3	4457
CSNK1A1	4457
C11orf54	4456
DR1	4452
KIF22	4452
LSM14A	4452
AP3B1	4451
PPP4R2	4450
QSER1	4449
PDS5B	4448
HMGB1	4447
LINC02256	4447
MBNL1	4447
ZDHHC8	4447
ZNF780A	4440
SLC25A36	4437
BICRAL	4435
ZC3H15	4433
CHD9	4430
IPO8	4429
TNPO3	4429
RN7SL370P	4428
FAM210A	4426
SMC4	4426
AGO3	4425
GIGYF2	4424
YWHAG	4424
RPS6KB1	4420
CCND3	4419
AC107959.2	4418
APPL1	4418
ZRANB1	4416
HNRNPR	4415
AC244669.1	4414
CEP350	4414
MROH8	4414
UBE2W	4414
DNAJB6	4412
SDCCAG3	4412
RIC8A	4408
AURKA	4407
GTF3C2	4407
PTEN	4407
MTPN	4406
PIGB	4405
AGPAT5	4404
ZNF546	4404
TBC1D5	4403
RBAK	4401
AL135744.1	4399
XPO1	4399
EIF3E	4398
WASHC4	4398
LINC00869	4397
NOCT	4397
LUC7L2	4396
NDUFA1	4393
MICU2	4391
MBNL1	4389
FOXP2	4388
LARP7	4388
LIMD1	4388
MYL12A	4387
PTAR1	4386
RAB18	4385
RAB8A	4384
CDK13	4382
FBXL3	4381
MAP3K1	4381
SNX11	4381
LARP4B	4380
OARD1	4380
RPE	4380
WAC	4380
FANCL	4379
CCDC26	4376
TPP2	4376
AC241585.2	4374
ATAD2	4374
FAM199X	4374
LTN1	4373
AC011008.1	4372
AC108866.1	4371
PTK2B	4371
MED13L	4368
PSMD14	4368
UBE2N	4367
WDFY2	4367
ZNF562	4367
GIT2	4366
ASS1	4365
WASL	4365
HDAC2	4363
PDS5B	4363
.	4362
SLC44A1	4362
KPNB1	4360
PAPD4	4357
DUSP7	4356
MFNG	4354
POLR1A	4354
.	4353
B3GALNT2	4350
NIPBL	4350
ATP2B1	4346
SERTAD2	4345
SRSF1	4345
PHF5A	4344
RNF4	4343
LCORL	4342
AP005018.1	4341
SLC38A10	4340
EIF4H	4337
RANBP3	4335
MAFK	4330
RPS19	4330
KDM4C	4328
NADK	4325
NRIP1	4324
PAN3	4324
DEK	4321
ABHD17B	4320
CLK1	4319
PGGT1B	4319
ANKRD12	4318
RBM39	4318
ABL1	4317
MED13L	4317
HERC1	4311
NCBP2-AS2	4311
ALOX12P2	4310
EPC1	4310
MIR142	4308
AC011247.2	4307
SOD2	4305
PRDX3	4304
FNIP1	4303
KCNN2	4300
PPP4R2	4300
AC079305.1	4299
PIK3R1	4299
.	4298
AC022540.1	4297
ARHGAP15	4296
ARID1A	4296
MIER2	4295
PUM2	4292
SNRPGP18	4289
XRN1	4289
KDM3A	4287
NDUFB9	4286
EZH2	4285
HNRNPA3	4284
DENND1A	4283
GATAD2B	4283
MAPRE1	4281
NRDC	4281
PARPBP	4281
ASXL2	4279
SMYD3	4278
FNDC3A	4277
ADGRE5	4276
SMAD5	4275
IREB2	4274
RPL39	4273
TTC28-AS1_1	4272
MAP2K3	4269
SP3	4268
LAMP5-AS1	4267
PAN3	4267
USP45	4267
IQGAP1	4265
CMPK1	4264
TAOK3	4264
RAD9B	4263
TMED7-TICAM2	4263
DGCR8	4262
DHX36	4262
ELP2	4262
.	4261
CCDC18	4261
SRGAP2	4261
ACY1	4260
GATAD2A	4260
CGAS	4257
RAD17	4257
ACSL3	4254
BCLAF1	4254
FXR1	4252
TMX3	4252
PPP1R12A	4251
USP9X	4251
RBM26	4245
SPIDR	4245
ADNP	4242
TCF12	4242
EPS8	4241
NAPG	4241
PPP1R15A	4240
SATB2	4240
AP002364.1	4238
KCNN2	4236
TPI1P2	4236
NAA15	4235
AC108002.1	4234
GSK3B	4233
SCYL2	4233
SNHG17	4231
UBE2H	4231
RSBN1	4230
BSG	4229
AL158801.2	4228
CHERP	4227
FNDC3A	4227
MNT	4227
TIFA	4226
U2AF2	4226
XBP1	4226
CALM2	4223
PTEN	4223
SPRTN	4223
CSMD3	4222
EEF2K	4221
ESYT2	4220
ADGRG5	4218
VAPA	4218
ARHGAP11A	4215
ATAD2B	4215
XKR6	4214
ATXN2	4213
SIN3A	4213
AFF3	4212
DDX17	4212
AC134669.2	4211
SATB2	4211
FBXO15	4207
EXOSC5	4206
SRRM2	4203
ATRN	4202
RN7SL681P	4202
LSM4	4199
ADNP2	4195
ZMPSTE24	4195
CGGBP1	4194
RPRD1A	4193
ACTB	4192
AL512631.2	4192
EIF4EBP1	4192
AL157911.1	4191
LMO2	4189
WAC	4189
ARNT	4188
SLIRP	4188
XKR6	4188
AFG3L2	4186
ETF1	4186
MSANTD4	4186
OSBPL8	4186
FBXW7	4184
AL121809.1	4183
CLEC11A	4182
CLTC	4181
TMEM259	4181
.	4180
ACADSB	4179
F3	4178
RFX7	4178
GRAMD4	4176
RWDD4	4175
C15orf39	4173
DENND1A	4172
KCNIP2-AS1	4171
VAMP8	4171
MBNL1	4170
TXNL4B	4170
ATP6V0C	4168
EPC2	4168
DENND6A-DT	4167
ZCCHC7	4167
RPRD2	4166
BAZ2B	4164
TMA16	4164
FRYL	4163
QKI	4163
GOLT1B	4161
TBL1XR1	4161
RNF19A	4158
TMEM258	4158
AL590787.1	4157
NUCKS1	4157
PRKAA1	4154
GPCPD1	4153
ITM2B	4151
NKAPP1	4151
ATP2A2	4150
TAOK3	4150
.	4149
DLEU1	4147
EPN1	4147
RAB21	4147
OXNAD1	4146
RSRC1	4146
FBXW7	4144
CDK13	4141
ARHGEF7	4140
SEC24B-AS1	4140
STIP1	4140
SLC39A9	4139
VPS52	4137
ASF1A	4136
AC105020.3	4135
RAB18	4135
TMEM248	4131
LAMP5-AS1	4129
TBC1D15	4129
CU634019.6	4128
SSR3	4128
TBC1D5	4128
ATAD3B	4125
HACD3	4125
ALOX12P2	4124
RALA	4122
NSMAF	4120
TAF5L	4117
AC087164.1	4116
COIL	4113
SMARCA4	4113
PUM2	4112
XRCC5	4111
RILPL2	4109
AC246817.2	4108
AKAP11	4108
TMEM179B	4108
CNOT1	4107
FAF1	4107
RANBP9	4107
PPP6R3	4106
RAP1B	4106
PARP8	4105
RFX3	4105
CCT6P1	4104
PARP8	4104
TEX10	4104
PNPT1	4103
FBXW2	4102
SETD3	4101
FAM126A	4100
MEIS1	4099
VPS37A	4096
.	4093
AC000081.1	4093
AKIRIN2	4093
YY1AP1	4093
LRRC8C-DT	4092
RPL11P4	4092
PIP4K2A	4089
RASA3	4088
PUF60	4086
AC242842.1	4085
PAN3	4082
TCF12	4080
PCIF1	4079
ASPH	4078
AL138724.1	4077
PPP4R3B	4075
CNIH1	4074
NT5C3A	4074
SNX13	4074
CLPX	4073
RPS10-NUDT3	4072
MBNL1	4071
NACA	4071
PPP4R3A	4071
RALY-AS1	4069
PBX3	4067
UPF2	4067
RNF2	4065
.	4061
NCOA4	4061
PLEKHA3	4061
UNC5C	4061
RNU6-135P	4059
B3GNT2	4058
KIF2A	4058
SLC16A3	4058
TM9SF2	4057
TOGARAM1	4057
UCHL5	4056
CAMTA1	4055
.	4054
DHX33	4054
DIDO1	4054
NUDT6	4054
TRA2B	4054
UBE3C	4053
CNOT2	4052
MED15	4052
C17orf80	4051
CLASP2	4049
GAB2	4049
MARCHIF7	4049
GTF2E2	4048
MBNL1	4048
ADGRF3	4046
AFDN	4046
AFTPH	4046
COA7	4046
NR3C1	4046
CALCOCO2	4045
GOLIM4	4045
UBE2D3	4042
ZBED6	4040
AL137779.2	4038
VPS26A	4038
GLG1	4036
PDS5B	4036
POLR3G	4036
PPIG	4036
AC092755.2	4035
EAF2	4034
MGAT1	4034
AC139530.2	4033
JMJD1C-AS1	4032
TFG	4031
AC083798.2	4030
RAB2A	4029
SCAF8	4029
ASB3	4028
PDE3B	4028
PIAS1	4028
TBCA	4028
ABRAXAS2	4027
COX5A	4026
OAZ1	4026
TNRC18	4026
TPT1-AS1	4026
INTS6	4025
YTHDF3	4025
YWHAZ	4025
CPEB2	4024
LRIG2	4024
ZC3H8	4023
KIAA0368	4021
NUP210	4021
PLA2G2C	4020
PVT1	4020
SPART-AS1	4020
GPATCH8	4019
KPNA4	4019
IMPAD1	4018
SLC44A1	4017
CD46	4016
AL359711.2	4012
SMNDC1	4012
RAB11A	4011
CXorf21	4010
MYC	4010
ZNF580	4009
TRGV9	4008
.	4007
PTMA	4007
FAM192A	4005
LPXN	4005
PABPC1P1	4004
VAPB	4004
ABCB10	4003
CNOT7	4001
UBE2G1	4001
ATAD2	4000
PSMA5	4000
AC008937.2	3999
MIR4263	3999
TXN	3997
EZH2	3995
KBTBD2	3995
DIAPH1	3994
SLK	3993
XRCC5	3993
SNX13	3992
ARIH1	3990
TRAM1	3990
ZNF292	3989
DDX19B	3987
FARSB	3987
SMARCD2	3987
VMP1	3987
AP2B1	3985
SATB1	3985
ZCCHC7	3985
STAG1	3984
ACTL6A	3979
BARD1	3979
.	3978
ZEB2	3977
PIGX	3976
ACSL4	3975
UBE2K	3974
TSEN2	3973
MLLT10	3972
AC007613.1	3971
EIF3H	3971
TRPM2	3971
ARF6	3970
FAM92A	3970
JMJD1C	3970
DCAF5	3969
SOCS6	3969
STK11	3969
AL354696.2	3968
FZR1	3968
GSEC	3967
CRKL	3966
THAP5	3966
MRPL58	3965
ADAM10	3963
AHCTF1	3963
CFAP52	3963
GALNT1	3963
ATP6V0D1	3961
PARGP1	3960
LBR	3959
SH3KBP1	3958
TFG	3958
ZEB2	3958
EXOC3	3957
IP6K2	3957
PARP8	3957
GOLGA8M	3956
CLIC4	3955
TYW5	3955
VPS13B	3955
COG5	3954
REXO4	3954
.	3953
DIS3	3953
POLR3H	3953
RAD51AP1	3953
MEX3C	3952
KHSRP	3951
SLC44A1	3951
KANSL1	3950
LDLRAD4	3950
CAMTA1	3948
MGST2	3946
PHF6	3946
S100PBP	3946
ZKSCAN8	3946
ZXDC	3946
TOPBP1	3945
GTDC1	3944
MIR3146	3944
PRMT1	3944
CDK6	3943
MED13L	3943
IFT74	3940
AC008894.3	3939
ARHGAP17	3939
ERICH1	3939
OVCH1-AS1	3938
SMYD3	3938
ATXN3	3937
STX6	3936
DCUN1D1	3934
GRB2	3934
RPTOR	3934
AL713998.1	3929
C18orf25	3929
MED13L	3927
MINOS1-NBL1	3927
RYK	3927
PSMB1	3925
UBE2W	3925
HMGCS1	3924
ME2	3924
GNB1	3923
.	3922
ERF	3922
RNPS1	3922
REPS1	3921
RPL9	3920
TTC39C	3920
ARPC2	3918
KIF5B	3918
TRIM24	3918
AL139274.2	3916
CYTOR	3915
TBRG1	3915
ZNF787	3914
DBNL	3913
CHI3L2	3912
GPHN	3911
NUDCD3	3911
PARP8	3911
PPM1G	3911
DOCK2	3910
MAP3K20	3910
CENPU	3909
GPATCH8	3909
RPS6KA3	3909
SLC17A9	3908
COA6	3907
ACYP2	3905
CREBBP	3905
PHLPP1	3905
THRAP3	3905
RBM39	3904
ZSCAN31	3904
RNU6-431P	3903
C9orf85	3902
IL17RA	3902
RUVBL2	3902
ERC1	3901
LRRC34	3901
MEF2C	3901
ADGRA2	3900
POMP	3899
MED13L	3898
MDFIC	3897
QKI	3896
ROCK1P1	3896
UGP2	3896
SNRPN	3895
AC006449.2	3894
OMD	3894
PAK2	3894
RAB18	3894
TMEM87B	3894
NDUFC1	3892
GRK2	3890
RNPEP	3890
AL731577.2	3889
CD4	3889
ATP5C1	3887
DCAF7	3887
SPRY2	3886
C1QBP	3885
CDK6	3885
OXSR1	3885
SYNCRIP	3885
TRAF2	3884
RNF10	3883
CDK6	3882
CTDSP2	3882
RPL11	3882
LINC01128	3881
SNHG16	3881
LRPPRC	3880
C9orf163	3879
INO80	3878
PIAS1	3878
LMO2	3877
NFE2L2	3876
UBE2G1	3876
APTX	3875
G3BP1	3875
KIF18B	3875
CDK6	3874
IGFBP2	3873
IRF8	3873
KPNA6	3873
LRRC27	3873
TXNRD2	3873
VWA8	3873
.	3871
RELT	3871
SRBD1	3871
NPTN	3870
AC087241.4	3869
EAF2	3869
FAM20B	3869
ARFIP1	3868
NDUFAF6	3867
PUM1	3867
HIC2	3866
HNRNPC	3866
.	3865
PMM2	3864
PWWP2B	3863
R3HDM1	3863
TLE4	3863
LIMD1-AS1	3862
IMPAD1	3859
UBE2V2	3859
MAT2B	3858
NORAD	3858
Z95331.1	3858
AC008124.1	3857
AL442663.2	3857
PRPS1	3857
SLC23A2	3857
ARID3B	3856
MFSD14B	3855
UBL3	3855
HECTD1	3854
RBM33	3854
ZNF121	3854
NCOA5	3853
TOMM6	3853
.	3852
HERC2P9	3852
PRR12	3852
SH2B3	3852
PLEK	3851
AL355353.1	3850
PIAS1	3850
TMEM64	3850
ATP8B4	3849
NOD1	3849
FILIP1L	3848
SMAD6	3848
INPP5D	3845
RNASEL	3845
Z98749.2	3844
MOCS3	3843
NDUFA5P2	3843
NR3C1	3843
FNIP1	3842
SUCLA2	3842
KANSL1	3841
IFI27L1	3840
WDR92	3840
PJA2	3838
SLC25A36	3838
TUBGCP3	3838
CDC73	3837
ING1	3837
RNU6-975P	3837
WNK1	3837
AC107871.2	3835
AC009303.4	3834
MTHFD1L	3834
ACACA	3833
HELLS	3833
XPO7	3833
FAM208B	3832
RNGTT	3832
AC005520.2	3831
ARID4B	3831
GTF2H2C	3831
PVT1	3831
.	3830
CARNMT1	3830
TM9SF3	3830
TTC17	3830
PRR13P1	3829
ATP5F1	3828
DCUN1D5	3828
NT5DC3	3828
OSBPL5	3828
CHMP7	3827
ZBTB25	3827
XPOT	3826
CCNH	3825
GALNT2	3825
MFSD1	3825
ST3GAL1	3825
AC019129.2	3824
DDI2	3823
HELQ	3823
PPP3R1	3823
TCFL5	3823
ARHGAP25	3822
GIGYF1	3821
UBE2V1	3821
AZIN1	3820
MIR3153	3820
SNORD15A	3820
KPNA5	3818
DEGS1	3817
GNB1	3817
SLC25A3	3816
PDAP1	3814
SVIL-AS1	3813
TBCA	3813
TRAPPC2	3813
.	3812
SLTM	3812
ERP44	3808
HECA	3808
SEC31A	3808
ZNF189	3808
PAG1	3805
PPP1CB	3805
RASAL2-AS1	3804
RPS10-NUDT3	3804
ARID1B	3803
U3	3803
ZEB2	3803
AP4B1	3802
FBXW7	3802
AC009053.2	3801
NDUFV2	3801
NUPL2	3801
TRAPPC4	3801
TUBGCP3	3801
PDE3B	3800
AL390961.1	3798
NDC80	3798
POLK	3798
PTPN2	3797
STXBP4	3797
MED13L	3796
PGAM5	3795
USP3	3795
UBE4A	3793
ARMC8	3792
VHL	3792
C9orf147	3791
ANKMY2	3790
CA5BP1	3789
AC008906.2	3788
SASH3	3788
ZCCHC11	3787
AC004678.1	3786
CEP85	3786
MLXIP	3786
MEF2C	3785
PRPF39	3785
RABL3	3785
DIAPH1	3784
SAE1	3784
TBC1D5	3783
CAB39L	3782
C5orf22	3781
SMARCA5-AS1	3781
ARID1B	3780
DUSP10	3780
SCAF11	3780
AL162311.3	3779
SCAF11	3778
NAP1L4	3777
TNKS	3777
AC016586.1	3776
INTS11	3776
RN7SL800P	3776
GPHN	3775
ITGAL	3775
RPN1	3775
ARHGEF1	3774
CDK6	3774
HPS3	3774
SLC39A3	3773
FNDC3B	3772
LNPEP	3772
SFMBT2	3772
TACC1	3772
EMC1	3770
IDH3A	3770
TBCA	3770
CCDC47	3769
MID1IP1	3769
AC093835.1	3768
CDC40	3768
ACTR2	3766
ARFGAP2	3766
MIB1	3766
PUM2	3766
CSMD3	3765
NCK1	3765
AC009226.1	3764
EMC7	3762
FAM239B	3762
MEF2C	3762
YY1	3762
CORO7	3761
PUM2	3761
RNF138	3760
RXRA	3760
.	3759
BRD4	3758
DICER1-AS1	3758
REEP3	3758
AC005154.1	3755
AKAP10	3755
LYST	3754
PTEN	3754
EIF1AD	3753
GOLGA8M	3753
SRSF11	3753
ARID2	3752
DGUOK	3751
HIKESHI	3751
.	3750
ETFA	3750
SHOC2	3749
GMFB	3748
ZFP91-CNTF	3748
CACYBP	3747
FBXO7	3747
LAT2	3747
NECAP1	3747
RNF219	3747
CEP78	3746
SMAP2	3746
SRPK1	3746
HKR1	3745
KAT6A	3744
LRRC8D	3744
SELENOT	3744
PUS7	3742
DCAF1	3741
KAT6A	3740
YME1L1	3740
SENCR	3739
MLEC	3738
ARHGEF2	3737
ECHDC1	3736
SLMAP	3736
AP3M1	3735
FLT3	3735
TMEM97	3735
AC087276.2	3734
ZMYND11	3734
MYLIP	3732
NDFIP2	3729
C5orf34	3728
RPL34-AS1	3727
KTN1	3726
SNHG3	3726
CLEC2D	3725
TMUB2	3725
VPS13B	3725
KDM2B	3724
CDC37L1-AS1	3723
AC135983.5	3722
EEF1E1	3722
CORO1C	3721
KLHDC3	3721
PIM1	3721
.	3720
ARHGEF7	3720
METTL3	3720
PIEZO1	3719
UBE2G1	3719
HNRNPF	3718
DIP2B	3715
FIP1L1	3715
PCM1	3714
UQCR11	3714
MECP2	3713
PGAM1	3713
AC018553.2	3712
EFR3A	3712
KIF20B	3712
TAGLN2	3712
CRELD2	3711
SENP6	3711
DNM2	3710
GSK3B	3710
SFSWAP	3708
AC008038.1	3707
ZCCHC7	3707
MRPL21	3706
AC027237.3	3705
AP003721.3	3705
RBL2	3705
TNKS	3705
HNRNPMP1	3704
TRA2B	3704
TOP1	3703
ABCE1	3702
FUS	3702
OXSM	3702
WNK1	3701
RPSAP16	3700
SMYD3	3700
AC018845.3	3699
ATP13A3	3699
NVL	3698
WEE1	3698
GCA	3697
SRGAP2	3697
ADGRL3	3696
POGZ	3696
CRBN	3695
LASP1	3694
SLC2A5	3694
SZRD1	3694
AC112907.3	3693
FAM204A	3693
ZNF644	3693
IRX5	3692
LCP1	3692
RNF44	3692
SRRM1	3692
SSBP4	3692
BLOC1S6	3691
PCNA	3691
SIPA1	3691
NCK2	3690
STAG3L5P	3690
CDC42SE2	3689
CFLAR	3689
GLA	3689
MFSD1	3689
TMEM161B	3689
ZNF638	3689
AC026150.1	3688
MEF2C	3688
RICTOR	3688
PRRC2B	3687
AVL9	3686
CXCR4	3686
ENO1	3686
SMG7	3686
CDC42	3685
EXOC3	3684
H3F3A	3683
PAN3	3683
PIP4K2A	3683
VASP	3683
MKL1	3682
SF3B1	3682
NME6	3681
MARS2	3678
PARP8	3678
DPM3	3677
MPC2	3677
NADK2	3677
OPA1	3677
AL596094.1	3675
FBXO41	3675
RAP1B	3675
RNA5SP159	3675
ZBTB24	3674
COQ10B	3673
RGS17P1	3673
SLC45A4	3673
AC002091.2	3672
SIK1	3672
SNX3	3672
CSTF3-AS1	3671
SMC5-AS1	3671
CHD6	3670
PBX3	3670
GTF3A	3669
RAPGEF6	3669
FUBP1	3668
PPP1CB	3668
SON	3668
NBPF26	3667
ZC3H13	3667
DGUOK	3665
PSMD10P1	3665
RICTOR	3665
SFT2D1	3664
FBXO5	3663
TRA2A	3663
UPF1	3663
AL928654.2	3662
NDRG1	3662
RAP1GDS1	3662
AHCY	3659
VWA8-AS1	3659
ZNF706	3659
NSD1	3658
SLC25A33	3658
ZFAND5	3658
RBM17	3657
SLC25A38	3657
GNG10	3656
PLAU	3656
EMSY	3655
ANKRD10	3654
HNRNPC	3654
MSN	3654
FAM49B	3653
ROCK1	3653
ATL3	3652
CLIC4	3652
CNTRL	3651
NOL10	3651
JMJD1C	3650
CU633904.1	3649
DNAJC5	3648
.	3646
AL513550.1	3646
TMEM260	3646
ZNF292	3646
LSM1	3645
WDSUB1	3645
ADK	3644
C1orf216	3644
MAP3K2	3644
MTBP	3644
POLR3E	3644
SCFD1	3644
ATF7IP	3643
TRIM44	3643
RSL1D1	3642
INPP5B	3641
CHST11	3640
PURG	3640
SIAH1	3640
ZNF394	3640
DMTF1	3639
PUM2	3639
SRGAP2C	3639
STK17B	3639
.	3638
FCHSD2	3638
PDS5B	3638
TMPO	3638
CAND1	3637
LNP1	3637
PDE3B	3637
PPP1R37	3637
SPI1	3637
AC124242.1	3636
SP3	3636
NTSR1	3634
SLTM	3634
ADAR	3633
TP53	3633
AP3B1	3632
CCNL2	3632
GSE1	3632
NOP56	3632
RFXAP	3631
.	3630
AC024592.3	3630
YTHDF1	3630
COX6C	3629
FNDC3B	3629
JMJD1C	3629
PPARD	3629
CBX3	3628
XKR6	3628
AC019080.1	3626
USP24	3626
ACLY	3625
EEF1D	3624
PCNX1	3623
AC090114.3	3621
DDX3X	3621
SP3	3621
USP34	3621
MED4	3620
OGFOD1	3620
ZNF430	3619
.	3618
EFR3A	3618
GAB2	3618
ARHGAP45	3617
USP34	3617
CNTLN	3616
RFC3	3616
SUZ12	3616
RPS6	3615
MARCHIF7	3614
ZEB2	3614
MAP4K5	3613
RPS7	3613
SIRT2	3613
HIF1A	3612
INPP5D	3612
NDUFB1	3612
SYNRG	3612
AC096536.1	3611
CRYZ	3611
KMT2E-AS1	3611
WASL	3611
CDC123	3610
UBAP1	3610
SETD5	3609
UBE2D3	3609
EIF4G3	3608
SEPTIN2	3608
KRAS	3607
PTPN6	3607
AL133368.1	3606
SIRPB2	3606
UBALD2	3606
LRIF1	3605
AL158152.2	3604
AL355490.1	3604
AP000229.1	3604
ARFIP1	3603
HNRNPUL1	3603
LINC01004	3603
CCT6A	3602
FLT3	3601
PFKM	3600
CWC22	3599
TET3	3599
NDUFS4	3598
RHOBTB2	3598
IDH1	3597
MYSM1	3597
ZZZ3	3597
DUX4	3596
TMEM70	3596
ZNF787	3596
N4BP2L2	3595
PFKP	3595
WDR33	3594
DDX39A	3593
ACTR5	3592
EMB	3592
FADS1	3592
MAP3K14	3592
MKLN1-AS	3590
USP11	3590
.	3589
ATAD2	3589
MARCHIF6	3589
CEPT1	3588
SUPT7L	3588
ZNF639	3587
.	3586
BCR	3586
GTF2E2	3586
MAPK9	3586
PARVG	3586
FAM49B	3585
UQCRC2	3585
VDAC1	3585
ZBTB17	3585
PECAM1	3584
PTEN	3584
AC108738.1	3583
USP15	3583
VPS13C	3582
ATP8B4	3581
LIN7B	3581
ATP2B1	3580
C12orf65	3580
PBX3	3580
ZFC3H1	3580
MIR7852	3578
RNF170	3578
PHF3	3577
SMIM15	3577
ANKRD46	3576
DHX15	3576
ABHD12	3575
AL391839.2	3575
TMEM165	3575
ZBTB6	3575
CATSPER2P1	3574
CU633967.1	3574
.	3573
VRK1	3573
HMGCR	3572
TBC1D5	3572
WASL	3572
ZMYM4	3571
PPP2R5E	3570
TUBB	3570
BRD8	3569
MED13L	3569
PLIN3	3569
ADCY7	3568
MED13L	3568
SSR4	3568
EEA1	3567
RIC1	3567
TAF5	3567
EXOC1	3566
AL121772.2	3565
BAZ2B	3562
PEX2	3562
PHLPP1	3562
.	3561
ETS2	3560
MEX3C	3560
PBX3	3560
ZNF84	3560
.	3559
TYK2	3559
UBR5	3559
ZFAND3	3559
GNAQ	3558
ORC2	3558
DECR1	3557
NSMAF	3556
RBM12B	3556
COPS3	3555
MTMR10	3555
PSPC1	3555
AC009509.1	3554
ADD2	3554
AC034105.3	3553
DENND1A	3553
MAPKAPK3	3553
BACH1	3552
INO80D	3552
AC087190.2	3551
HDAC1	3551
LENG1	3551
PBK	3551
ZMYND11	3551
AC116351.1	3550
TNFAIP3	3550
FAM107B	3549
SNRPB	3549
AC233280.1	3548
CU638689.5	3548
FOXN2	3547
GRSF1	3547
RTN4	3546
STAG2	3546
AL451074.1	3545
ATP11A	3545
TICRR	3545
AC099340.1	3543
GABPA	3543
HIST2H2AA4	3543
AC069213.1	3541
DNAJC1	3541
PPP2R5E	3541
PRRC1	3541
ZNF511	3541
RN7SL809P	3540
TRIM14	3540
ANKRD18DP	3539
RIDA	3539
CCNJ	3537
MARCHIF6	3537
PJA2	3537
UBR2	3537
SKIV2L2	3536
SPCS1	3536
AL022328.4	3535
PREP	3535
SMAP1	3535
TFPT	3535
TRIP12	3534
ZSWIM3	3534
AL353759.1	3533
CSTF3	3533
DMXL2	3533
PACSIN2	3533
XPO1	3533
CHSY1	3532
RSL24D1	3532
PDLIM1	3531
BAG3	3530
MUT	3528
RAB6A	3528
HBS1L	3527
UBE2T	3527
PPP4R2	3526
ZDHHC6	3526
ETFA	3525
SLC6A6	3525
USMG5	3525
ACAT1	3524
AMPD2	3524
APEX1	3524
CARS2	3524
IFRD1	3524
ITM2B	3523
PFDN1	3523
TRIM25	3523
GPAT4	3522
ZCCHC11	3522
ZWILCH	3522
EFTUD2	3521
EMILIN2	3521
KIAA1143	3521
BCL2L13	3520
ERBIN	3520
LSM8	3520
ERMARD	3519
PUS3	3519
CDK7	3518
PCF11	3518
TIMM9P1	3518
UBE2W	3518
PBX3	3516
PSMA3	3516
TIPARP-AS1	3516
TMED5	3516
ZNF217	3516
ATL2	3515
POLK	3515
PDS5B	3514
AEN	3513
DNAJC21	3512
AF064858.1	3511
[truncated: 261 more rows]

## Sheet: THP1 Top 5%
Gene IDs	Length
.	6194
ZNF670-ZNF695	6148
.	5542
.	5387
.	5227
CAP1	5142
.	5070
.	4967
HDGF	4857
NDC1	4805
H2AFV	4761
PTBP1	4720
AFG3L2	4702
HNRNPH3	4632
MIR1306	4596
H3F3A	4568
ZNF410	4538
SRP9	4514
TRIT1	4508
NDUFC2-KCTD14	4495
CDC42	4456
MTF2	4432
ERV3-1	4426
FDFT1	4414
MALAT1	4343
SNORA14B	4342
.	4316
NUCB2	4286
.	4283
JPT1	4272
AL603839.3	4261
NMI	4243
RLF	4243
.	4217
GMFB	4216
MYB	4190
MRPL44	4184
.	4181
HNRNPR	4144
IRF2BP2	4126
SRSF3	4102
DDX39A	4096
CCR2	4093
KIFC1	4091
AL158211.1	4085
AC008124.1	4062
FAM133B	4008
ROCK1P1	3982
RASAL2	3966
SVBP	3957
PTK2B	3950
TAGLN2	3936
IVNS1ABP	3935
FOXJ3	3920
DHRS9	3919
SMAP2	3908
AGO2	3897
.	3886
MEF2D	3879
SPRTN	3878
.	3870
B3GALNT2	3853
STT3A	3851
MTCH1	3846
TWIST1	3835
KPNB1	3822
EIF3B	3817
PTEN	3814
KIF20B	3813
MYL12A	3811
AC004854.2	3809
CAP1	3805
.	3798
MS4A7	3796
MBNL1	3790
.	3770
UBE2T	3769
LAPTM5	3764
ZHX1	3755
RALY	3748
SRRT	3746
ATP6V0C	3738
CPNE1	3734
DPY19L4	3734
RAF1	3716
SNX11	3715
ZNF451	3711
HMGN1	3693
KBTBD2	3693
HIPK3	3692
NVL	3687
TRIT1	3678
GANC	3674
PPP1R15B	3669
ARHGAP11A	3667
.	3660
SMAD6	3655
MYSM1	3648
.	3647
MCL1	3640
.	3639
CCT8	3639
AC087241.3	3635
ZBTB25	3635
PLEKHB2	3632
FAF1	3625
CNST	3613
.	3593
.	3591
NCK2	3583
FUBP1	3582
PABPC4	3581
MIR3153	3580
.	3577
CACYBP	3574
RAB44	3569
.	3558
DCP2	3557
UBP1	3548
COX5A	3546
GOLPH3	3544
CERK	3543
GUK1	3536
MIR1184-3	3529
.	3521
TIPRL	3515
OAZ1	3513
NFYC	3495
PHF3	3487
AL590133.1	3484
LDLR	3479
UBE2J2	3479
NEK7	3475
PGAM1	3473
KNL1	3471
TMED7-TICAM2	3467
UTP23	3461
PTMA	3460
TFRC	3460
OGFRL1	3457
SHOC2	3457
ABCA11P	3456
NASP	3455
CAAP1	3451
AC097717.1	3444
AC009107.2	3434
CNN2	3427
UPF2	3427
RGL1	3419
RRNAD1	3419
HNRNPH1	3414
SYNCRIP	3413
SDHAP1	3412
.	3411
MORF4L1	3410
RBBP6	3406
KANSL1L	3390
AL162595.1	3380
AC005523.2	3377
KCTD3	3360
AL121832.2	3359
DNAJB1	3359
MTHFD2	3359
NRDC	3357
DR1	3356
CCT6P3	3355
YBX1	3347
KARS	3346
P2RY6	3346
SLC38A2	3339
EIF4H	3338
SLC2A1	3338
.	3335
HNRNPK	3335
RSBN1	3333
FNIP1	3327
PANK4	3327
ZNF736	3324
PRPF38B	3319
Y_RNA	3319
AC139795.1	3315
U2SURP	3311
BCL7B	3303
SEC16A	3293
DDX1	3292
NSD2	3292
XRN1	3292
.	3289
GOPC	3284
.	3278
AC132008.2	3278
AL513550.1	3265
CHAMP1	3259
UBE2J1	3257
AZIN1	3250
LONP1	3250
U2AF2	3250
ARL6IP1	3249
COG4	3249
RSRC2	3243
DHX9	3242
.	3241
RPS7	3238
SRSF11	3235
ZFAND5	3234
ZBTB2	3231
MED8	3230
GCFC2	3229
GRB2	3229
ECT2	3225
UBA2	3217
CCNB1IP1	3215
ZC3H15	3213
CCNL1	3211
MYC	3210
CRKL	3209
GIGYF2	3209
AL928654.2	3207
PRRC2C	3206
SMARCA2	3206
.	3205
GIGYF1	3204
PPIL4	3203
VASP	3202
FAM201A	3201
AC025442.1	3198
RALY-AS1	3194
AC079313.2	3189
PGS1	3189
ZNF92	3186
EIF3M	3180
SNORD87	3178
CBX3	3176
CLNS1A	3173
EWSR1	3171
PIK3R1	3170
MEMO1	3168
EIF4G1	3166
HBS1L	3165
HNRNPA0	3165
DCAF1	3157
FNTA	3157
IFT46	3157
NRIP1	3157
LCORL	3156
PHRF1	3155
MATR3	3154
ACTB	3148
NFYC-AS1	3146
CDC34	3141
DEF6	3140
FOS	3137
AL390728.4	3131
AC130469.2	3130
ZNF670-ZNF695	3122
HECTD1	3121
RBM12B	3118
RCL1	3114
TRIM25	3114
SPC24	3111
AC002467.1	3108
C11orf71	3107
ARHGAP30	3106
DHX8	3105
CSPP1	3104
GRSF1	3104
TOB1-AS1	3103
TRIM59	3100
AC090971.5	3099
AP006621.3	3096
PUF60	3096
TICRR	3095
PREP	3094
DAZAP1	3092
SDE2	3092
TLE1	3092
SIRPB1	3090
EAF2	3088
TBC1D10B	3086
FAM49B	3085
SLAIN2	3082
ATF7	3081
SLMAP	3081
PRELID3B	3080
AC099522.2	3077
KDELR2	3077
ZNF224	3075
SCMH1	3073
RAB21	3069
VCP	3067
VPS13B	3066
RUFY2	3062
ARHGEF2	3060
EPRS	3055
AC019131.1	3054
DDX6	3052
ELANE	3050
KHDC4	3050
AL691403.2	3048
RN7SL681P	3048
FOXN2	3045
SNORD15A	3043
NSMAF	3042
AP3B1	3041
CALU	3041
IFI27L1	3040
METTL22	3039
PARP3	3039
MAP3K21	3037
TBC1D15	3036
EP300	3034
ORMDL2	3033
ARID1B	3031
.	3029
AC130651.2	3027
RNPEP	3025
AL121983.1	3023
ASNSD1	3022
AC005921.3	3021
NSMCE2	3019
AL078459.1	3018
FAM91A1	3017
RNASEH2B	3015
SQLE	3015
IDH1	3014
ATP13A1	3009
LINC02001	3009
AC012615.4	3008
GPBP1	3007
.	3002
CD164	3002
CGAS	3002
TARS	3002
CLSTN1	2998
MIR6813	2997
ZNF398	2996
IQGAP3	2995
ZNF445	2995
AC007364.1	2994
PRICKLE1	2994
HSPA13	2993
SAP18	2993
LIG1	2990
POLR1C	2990
TPBG	2990
FAM230C	2989
CLTA	2988
SLC50A1	2988
KDM2B	2987
CTPS1	2985
SNORD48	2982
STAT1	2982
INPPL1	2978
AL845472.1	2977
LINC00449	2977
MILR1	2976
TBX18	2975
GPD2	2974
YTHDF3-AS1	2973
RNPS1	2972
LDHB	2969
MDM4	2969
MEF2D	2969
NUP35	2967
CYB5R4	2965
NORAD	2965
DUS2	2964
PARP1	2961
MYB-AS1	2957
NT5C3A	2957
.	2956
BX649632.1	2956
RGP1	2956
WDR45B	2955
AC243772.2	2953
UBE3C	2952
NOMO2	2948
ARL5A	2947
AC011290.1	2944
SNRPD1	2943
IFRD1	2942
MAPK1	2939
CEP295	2938
USP1	2938
RNF19A	2937
CITED2	2936
BTF3L4	2932
CNOT4	2932
MED21	2932
PUM2	2931
UBE2F	2931
RAD54B	2929
BRD2	2926
CENPC	2924
DCTN6	2924
ADCY9	2923
ZNF131	2922
HNRNPA3	2918
RPSAP31	2916
.	2914
.	2914
GTPBP2	2914
ZBTB11-AS1	2914
B4GALT5	2913
AC244453.2	2912
NLRP3	2912
STK38	2912
FBXO7	2911
.	2910
AL358852.1	2908
DPYD	2906
LRPPRC	2906
SMAP2	2905
TMEM79	2902
RAB1A	2901
DUSP6	2900
FAM78A	2900
SNORD14C	2899
AC090001.1	2898
PPP3CB	2898
DDX46	2897
UBXN2B	2897
AL354732.1	2896
CCAR1	2896
INCENP	2894
PPP2R2D	2892
KRR1	2889
RBBP4	2886
VPS4B	2886
SUMO2	2884
AL139385.1	2883
PPP5D1	2883
AL442663.3	2881
AC018410.1	2879
SUGCT	2879
DUSP3	2878
UBR5	2878
CKAP2L	2877
DSCR3	2877
COMMD1	2876
TRMT61A	2876
BRD4	2875
AC087741.3	2873
CSK	2873
PCNT	2872
TSC22D4	2871
CMC1	2867
LMNA	2867
THUMPD3-AS1	2866
DNTTIP2	2864
KBTBD11	2864
SCYL3	2860
VTA1	2859
DNMT1	2858
AP001107.7	2853
FBXO28	2852
TBC1D31	2851
CDK1	2848
XPO1	2847
LCP2	2846
NCAPG	2842
ARF4	2840
NRBF2	2840
PRDX1	2839
GLRX2	2838
SRRM2	2835
RSBN1L	2834
SMARCB1	2834
PTBP2	2832
MIR3661	2830
HINT3	2829
C9orf147	2828
ESD	2827
BUB1B	2826
.	2823
AP3S1	2823
ZIC2	2821
MORN1	2820
CCR1	2819
PRMT1	2819
UBE2R2-AS1	2818
RNU6-975P	2817
BCLAF1	2816
POLR2M	2816
ENO1-AS1	2814
B3GNT2	2813
PUM1	2813
.	2812
HEATR4	2812
PAG1	2812
PCCB	2812
AC025257.1	2811
GTF2B	2810
MIR4646	2808
AL359878.1	2805
HNRNPUL1	2804
ZC3H7B	2802
DNAH14	2801
ABRACL	2800
ABHD17AP3	2799
RFX7	2796
AL354696.2	2795
TAF1D	2795
COQ2	2794
USP38	2793
SNRPC	2792
NFYC	2791
VAPA	2790
HMGCS1	2788
RPP30	2788
TAOK1	2788
KIF22	2785
NUP210	2783
RAB11A	2782
CFL1P1	2781
NELFCD	2781
RAP2B	2781
COL6A4P1	2778
SUMO1	2777
TTC7A	2777
APLP2	2776
GNG5	2776
OSBP	2776
AC239798.2	2773
C2orf76	2773
YWHAZ	2773
RPS2	2771
STARD3	2770
EDC4	2769
RBM4	2769
AC087276.2	2768
NPM1	2767
POLR2J2	2767
TNFRSF1A	2766
HNRNPC	2765
CHAF1A	2763
SLC25A3	2762
AC080038.1	2761
ARF6	2759
SNORA21	2757
CDC7	2755
NUP85	2754
AL158152.2	2753
AC137767.1	2752
DNAJC9-AS1	2752
MRPL32	2752
MBIP	2751
AL137784.2	2750
BARD1	2750
WIZ	2750
ARPC3	2748
NBPF12	2748
RREB1	2748
RPL22L1	2747
TMEM50A	2743
GCLM	2741
AC027307.3	2739
HIF1A	2739
PDCD10	2738
C10orf91	2737
KMT2D	2736
RAD21-AS1	2736
ZNF639	2736
AC005614.1	2735
ATP5A1	2735
MIR21	2735
RAP1B	2731
PRPF3	2730
TOR4A	2728
TRIM13	2728
SMAP2	2726
AL596442.1	2725
HECA	2725
CAPZB	2721
PSMD12	2719
AC125603.2	2718
IP6K2	2718
FBXO5	2717
NDUFB6	2717
AF129075.2	2715
DCP1A	2714
HMMR	2714
RIF1	2714
RPE	2713
SLU7	2712
SLC22A15	2710
UBE2K	2710
ZBTB43	2710
AC006160.1	2709
KDM4A	2709
POC1A	2708
SEPTIN6	2708
PABPC1	2706
.	2705
GNPAT	2705
S100A11	2705
MAPK14	2704
TOMM7	2703
WRAP53	2703
YY1	2703
KIAA1586	2702
RPS10-NUDT3	2701
AC233280.1	2698
SMCHD1	2698
SUCO	2694
RNF11	2692
PLD4	2691
MIR484	2688
AC006460.2	2687
OGFOD1	2687
SIN3A	2687
SNORA38	2685
SRD5A3-AS1	2685
AL513165.2	2682
PGD	2682
PSMA3	2680
SDAD1	2677
ANP32E	2676
EDEM3	2676
CCDC183-AS1	2675
CDC42SE2	2674
S100PBP	2674
LYST	2672
PPM1B	2672
PIM2	2671
PANK3	2670
REPS1	2670
ISL2	2669
AP000692.2	2668
UBC	2668
STIL	2667
FAR1-IT1	2666
MIR7111	2666
MLLT11	2666
STAT6	2666
MFSD1	2664
RAB28	2664
MIR544B	2663
IRF3	2661
RPS28	2661
.	2660
CASP2	2660
DSE	2660
AL356512.1	2659
ZBED6	2658
SMC5-AS1	2657
GGA1	2656
NUFIP2	2656
SWAP70	2654
NAPG	2653
PPP1CC	2653
NFX1	2652
NIN	2652
LMO2	2651
PTP4A1	2651
PAK2	2648
AC009509.1	2645
PLIN3	2645
CDC42EP3	2644
NAP1L4	2643
SH3GLB1	2643
FASTKD1	2642
FKRP	2642
SNORA84	2641
DLEU1	2640
MED1	2640
RPSA	2639
VPS13B	2639
ATF5	2638
COX7B	2637
FZD1	2637
PAIP2	2635
MIR142	2633
AL096677.1	2632
C6orf62	2632
SH3KBP1	2631
RPL5	2629
ZMYM4	2629
ZNF644	2629
SLC1A5	2627
SUZ12	2627
COX7A2	2622
SLC35D1	2622
TSTD2	2621
CASC9	2618
HGSNAT	2618
EZR-AS1	2615
MYNN	2615
SAE1	2615
SNORD50B	2613
AC044849.2	2612
PPM1A	2612
E4F1	2611
.	2610
CPSF6	2610
UBXN4	2610
WTAP	2609
PANK1	2608
RAB32	2607
GALK2	2606
FOXN3	2604
ZNF627	2604
RPS3A	2602
DNAJC15	2601
ERCC5	2601

## Sheet: Unique genes Top 5%
MV4-11		THP-1		MOLM-13
MED13L		CAP1		RPL35AP31
MTERF3		NDC1		RNU6-1188P
AL132639.2		H2AFV		ZNF521
ABHD13		MIR1306		EFNA5
UQCRH		SRP9		AC137932.1
PHLPP1		TRIT1		ETV6
TCERG1		ERV3-1		C4orf36
AC008040.1		JPT1		BCL2
EIF3A		AL603839.3		AC132807.2
CSDE1		AL158211.1		NCAM2
AC023632.2		FAM133B		POU2F1
AC090579.1		IVNS1ABP		AC008875.1
AZIN1-AS1		DHRS9		AL139125.2
STKLD1		AGO2		CAHM
AC019163.1		MTCH1		FAM72A
SMC3		TWIST1		LINC00908
TP53I13		EIF3B		SRGAP2B
SRGN		AC004854.2		IGF1R
CUL4A		MS4A7		NFIA
YBX3		LAPTM5		RN7SL65P
QKI		SRRT		FAM53B-AS1
LINC01578		DPY19L4		KAT6B
HSPE1-MOB4		HMGN1		INPP5A
CAND1		GANC		PITPNC1
EIF2A		MCL1		AKT3
TPP2		CCT8		DYRK1A
CSMD3		AC087241.3		C9orf66
AFF1		PLEKHB2		CCNY
PPP3R1		PABPC4		CCDC144NL-AS1
PPP6R1		RAB44		KANSL1-AS1
RAD21		UBP1		CRADD
TPR		GOLPH3		ASH1L
SMIM3		CERK		PLEKHA8P1
EDEM1		GUK1		ZNRF1
API5		MIR1184-3		RNF220
HNRNPD		TIPRL		ABR
AL031428.1		AL590133.1		HMGA2
CAB39		LDLR		GALNT7
ARL14EP		UBE2J2		AC092171.3
C21orf62-AS1		KNL1		TPD52
PKP4		UTP23		HDAC4
AC018926.2		TFRC		TNS3
ZNF678		OGFRL1		FABP5P3
PDIA6		ABCA11P		AC127502.2
LRMP		AC009107.2		GOLGA8N
HP1BP3		CNN2		BCOR
DDX10		RGL1		EPB41L2
MTPAP		SDHAP1		HOXA11-AS1_3
MIR155HG		KANSL1L		ARRDC1-AS1
SUGT1		AL162595.1		SDC2
AL136131.3		AC005523.2		KDM6A
IPO9-AS1		KCTD3		LRCH1
LINC01138		AL121832.2		CHD7
ANLN		MTHFD2		TNPO1
UNC5C		CCT6P3		NUDT3
FASTKD3		KARS		FBXW11
ENTPD4		P2RY6		ZMIZ1
PLEKHO2		SLC38A2		AC073592.3
TDG		SLC2A1		CELF2
ERP29		PRPF38B		AC092910.2
PUM3		AC139795.1		AL356776.1
AC018413.1		BCL7B		BBIP1
AFDN		SEC16A		TRAF3IP2-AS1
AC040970.1		GOPC		RPL23AP11
LEPROTL1		UBE2J1		FLJ20021
ADSS		ARL6IP1		FAM193A
Z93241.1		COG4		EPB41L3
SGO2		RSRC2		AAK1
FLT3		ZBTB2		OGFRP1
MBLAC2		MED8		FAM72C
C11orf58		GCFC2		PPARGC1B
ARGLU1		ECT2		APBA2
AL139393.2		CCNB1IP1		MIR3140
UBE2L3		SMARCA2		RN7SKP37
CREG1		PPIL4		GGPS1
MARCHIF7		FAM201A		NCAM1
BIRC6		AC025442.1		NACC2
ELOC		AC079313.2		GPR27
LINC01126		ZNF92		THOC7
NUP153		EIF3M		UBE2E1
MOB1A		SNORD87		EEF1A1P25
TEX41		EIF4G1		AL158801.1
ATF2		HNRNPA0		AC100771.2
E2F3-IT1		FNTA		MIR626
AL136115.2		IFT46		AHRR
AC010203.2		NFYC-AS1		hsa-mir-550a-1
ZNFX1		CDC34		UBE3A
GLUD1		DEF6		RUNX2
STK38L		FOS		TLK1
TTC28		AL390728.4		AC078962.4
AC005670.1		SPC24		PAFAH1B1
AC069236.1		AC002467.1		FAM120AOS
RNASEH2B-AS1		C11orf71		SYNPO2
AC073263.2		DHX8		CBFA2T3
APAF1		CSPP1		SKI
IFFO1		TOB1-AS1		E2F3
PSMA6		TRIM59		PLCG2
CRLF3		AC090971.5		UCK2
FEM1B		AP006621.3		MIRLET7BHG
ZNF148		SDE2		CDK17
LINC02256		TLE1		SPEN
TNKS		SIRPB1		RAB10
PSMA2		TBC1D10B		AC017083.1
PRPF40A		PRELID3B		NFIC
WSB1		AC099522.2		RFWD2
SCLT1		KDELR2		CBWD1
HSPA5		ZNF224		INSR
AL136311.1		VCP		TMEM131
GFPT1		RUFY2		FOXK1
MTMR9		EPRS		HAUS8
CEBPG		KHDC4		MAPKAP1
STARD3NL		AL691403.2		BRAF
PLEKHJ1		CALU		PIK3AP1
XPNPEP3		METTL22		STK10
UGCG		PARP3		AC138649.3
ZNF146		MAP3K21		FLI1
YIF1B		ORMDL2		SDHDP2
AL512380.2		AC130651.2		VKORC1L1
RAD23B		AL121983.1		RAB7A
EED		ASNSD1		AP002986.1
SRSF10		AC005921.3		PDCD6IPP2
FBL		NSMCE2		RNU6-155P
CLECL1		AL078459.1		AC016727.1
XRN2		SQLE		AL049830.4
N4BP2L1		ATP13A1		SDCCAG8
ATRN		LINC02001		AC091046.2
AL136115.1		CD164		ATXN10
NSRP1		TARS		FBXO11
AHR		CLSTN1		VGLL4
KLHL28		MIR6813		MBP
GLO1		IQGAP3		RBPJ
COX16		ZNF445		PIK3CD
FOXP1-IT1		AC007364.1		RAI1
NDUFV2		PRICKLE1		LYN
AF117829.1		HSPA13		AL390754.1
CXXC5-AS1		SAP18		BAHCC1
IMPAD1		LIG1		CCDC88C
AC012291.1		POLR1C		MYH9
NAP1L1		TPBG		NBPF19
LINC-PINT		FAM230C		AC239799.1
FAM120A		SLC50A1		SPRED2
AC091959.3		CTPS1		KCMF1
KANSL1		SNORD48		AC025178.1
SETD2		STAT1		TEX2
MAN2A1		INPPL1		MIR7854
SNHG1		AL845472.1		PDSS2
AL356599.1		LINC00449		ARRB1
RP2		MILR1		CELF1
POLD1		TBX18		FNBP1
SEC31A		GPD2		NBPF14
ELOA		YTHDF3-AS1		TBC1D14
C14orf178		LDHB		SEPTIN9
RAP2A		MDM4		MIR591
TRAF7		DUS2		RNU4-89P
SFT2D2		PARP1		KMT2E
TNPO2		MYB-AS1		YDJC
WDR3		BX649632.1		USP10
DDX31		RGP1		ZCCHC8
C9orf85		WDR45B		SFMBT1
TM2D3		AC243772.2		AC010442.1
HCFC1-AS1		NOMO2		FAM35A
TMA16		AC011290.1		AC135507.2
MAP2K7		SNRPD1		SOCS2
GZF1		CEP295		ZFAND6
CEP76		CITED2		AC127024.2
SNRNP25		CNOT4		ERICD
GORASP2		MED21		NFATC3
PARP4		UBE2F		RNU6-151P
TARBP1		RAD54B		AC008764.7
FAXDC2		BRD2		PIGL
RACGAP1		CENPC		ARHGAP35
MIR1281		RPSAP31		RAPGEF1
U2AF1L5		GTPBP2		TBCE
CEBPZ		ZBTB11-AS1		LRRC8C
AC005540.1		AC244453.2		GPX1
ADGRG5		STK38		LUZP1
CANX		AL358852.1		KCNQ5
ZNF321P		DPYD		RNU6-1034P
ARF4-AS1		TMEM79		ACAP2
RAB3GAP1		DUSP6		MARCHF5
COPS5		SNORD14C		AC009961.1
SLC25A40		AC090001.1		MIR8066
AC005514.1		PPP3CB		RYBP
LINC01301		DDX46		RN7SL503P
TRIQK		UBXN2B		KDM2A
AC092053.3		AL354732.1		CDYL
MFSD11		CCAR1		AP003086.2
AC009908.1		INCENP		AC011471.3
AC008622.2		KRR1		RN7SL719P
P4HA1		RBBP4		AC009403.2
GSK3B		VPS4B		CCDC12
EGLN2		SUMO2		CEP85L
RNU4-49P		AL139385.1		RNMT
AP002449.1		PPP5D1		SAFB
KCNAB2		AL442663.3		AC093414.1
MIR124-1		SUGCT		AP006259.1
C20orf197		DUSP3		IRAK3
AC009299.3		CKAP2L		USP12
LUC7L3		DSCR3		CTDSPL2
RPL36AL		COMMD1		SMURF2
MSH6		TRMT61A		STK24-AS1
SRFBP1		AC087741.3		ELL
RPL9P32		CSK		PKN2
TXNL4A		PCNT		MARK2
WDR43		TSC22D4		MNAT1
TNKS2-AS1		CMC1		IGF2BP3
RGS5		LMNA		YES1
DOCK11		THUMPD3-AS1		TNRC6B
MKKS		DNTTIP2		AP000936.3
AGTPBP1		VTA1		ZFX
RPAIN		DNMT1		LRRFIP1
COPS2		AP001107.7		FAM172A
MTHFD1L		FBXO28		RNU6-142P
SPN		CDK1		ELOCP33
TAF1B		LCP2		RNU6-268P
PTRHD1		NCAPG		SPPL3
ATP5S		ARF4		YWHAE
TBCAP3		NRBF2		SNRK
LCP1		PRDX1		WAPL
FLJ37453		GLRX2		APBB1IP
EMG1		SMARCB1		AC108688.1
PLEC		MIR3661		CCDC6
LDB1		HINT3		SUMO2P8
TBK1		ESD		ACTN4
Z83844.2		BUB1B		NEK6
MAN1A2		ZIC2		HDAC9
UGP2		MORN1		TDGF1P6
USP42		CCR1		ACTN1-AS1
NUDCD1		UBE2R2-AS1		WASF2
NHLRC3		POLR2M		SPOP
CENPA		ENO1-AS1		PPFIA1
BRIX1		HEATR4		Z98885.3
WDR26		PCCB		STXBP5
RBM33		AC025257.1		UBE2D2
SYK		GTF2B		AC027682.4
MKLN1		MIR4646		BBIP1P1
NCR3LG1		AL359878.1		ELOVL5
CNBP		ZC3H7B		LSM5
VCPIP1		DNAH14		APTR
GPR132		ABRACL		SBNO2
FUNDC2		ABHD17AP3		HMGB3P21
RPIA		TAF1D		LINC00997
ACBD5		USP38		TAX1BP1
NET1		SNRPC		APOLD1
RAP1A		RPP30		TAF4
ZNF431		TAOK1		WBP1L
NAA16		NELFCD		MIR3680-2
TIA1		RAP2B		MPP6
TOR1AIP2		COL6A4P1		MAP3K5
CLASP2		SUMO1		ARL8B
PTGER4		TTC7A		C6orf106
AL442067.1		GNG5		TMEM131L
TMX1		OSBP		RPL4P6
CASP8		AC239798.2		ANXA4
CDKN1B		C2orf76		ROCK2
CCDC127		RPS2		WNT7B
CGGBP1		STARD3		PTPRJ
GPSM2		EDC4		USP32
ANKRD13B		NPM1		TMEM123
PHGDH		POLR2J2		DAP3
MSL2		TNFRSF1A		ATP6V0E1
RPS15A		AC080038.1		ZMYND8
PPP2CB		SNORA21		RAB3GAP2
AC008440.1		NUP85		TFDP1
BORCS8-MEF2B		DNAJC9-AS1		KATNBL1P1
NKRF		MRPL32		NCOA3
AP005432.1		MBIP		ANKRD18B
ESCO2		AL137784.2		NFATC1
LAMTOR5-AS1		WIZ		RPRD1B
ALG11		ARPC3		SNORA19
C11orf54		NBPF12		SPOPL
LSM14A		RPL22L1		AC027601.4
HMGB1		TMEM50A		MZT1P1
ZDHHC8		GCLM		AC026124.2
ZNF780A		AC027307.3		AL356020.1
SLC25A36		PDCD10		KLF13
BICRAL		C10orf91		RNA5S16
CHD9		RAD21-AS1		AC096667.1
IPO8		AC005614.1		MFSD14C
RN7SL370P		ATP5A1		DOT1L
FAM210A		MIR21		INPP4A
AGO3		PRPF3		KIAA0232
RPS6KB1		TOR4A		RBMS2P1
CCND3		TRIM13		USP31
AC107959.2		AL596442.1		MIR4439
APPL1		PSMD12		SH2D7
AC244669.1		AC125603.2		UBE2O
MROH8		NDUFB6		AL606517.1
SDCCAG3		AF129075.2		MIR3975
RIC8A		DCP1A		TRAPPC12
AURKA		RIF1		ARHGAP12
GTF3C2		SLU7		GOLGA8Q
PIGB		ZBTB43		CLASP1
ZNF546		AC006160.1		ZNF592
RBAK		KDM4A		NDUFV2-AS1
AL135744.1		POC1A		SCARB1
WASHC4		PABPC1		GRB10
LINC00869		GNPAT		SLC25A13
NOCT		S100A11		ATG5
NDUFA1		TOMM7		CDK8
LARP7		WRAP53		PDCD6
PTAR1		KIAA1586		TRERF1
RAB18		SMCHD1		AC016831.5
RAB8A		RNF11		FLNB
FBXL3		PLD4		PHC3
MAP3K1		MIR484		SOS1
OARD1		AC006460.2		PRDM2
FANCL		SNORA38		TSNAX
CCDC26		SRD5A3-AS1		BCL2L11
ATAD2		AL513165.2		MAPKAPK2
FAM199X		PGD		COMMD3
LTN1		SDAD1		RN7SKP9
AC011008.1		CCDC183-AS1		PHTF2
AC108866.1		PIM2		N4BP1
PSMD14		PANK3		AC104763.2
WDFY2		ISL2		TSHZ1
ZNF562		AP000692.2		LARP1
GIT2		UBC		TNFAIP8
ASS1		STIL		DMGDH
HDAC2		MIR7111		ARHGEF18
SLC44A1		MLLT11		AL353748.2
PAPD4		STAT6		SPRED1
DUSP7		RAB28		MAP3K4
MFNG		MIR544B		MXI1
SERTAD2		IRF3		ZMYM2
SRSF1		RPS28		KIF9-AS1
AP005018.1		CASP2		EXOC6
SLC38A10		DSE		HECTD4
MAFK		AL356512.1		MAP2K1
RPS19		GGA1		RBMS1
NADK		SWAP70		RN7SL413P
CLK1		PPP1CC		NIPA1
PGGT1B		NFX1		AC138028.1
ANKRD12		NIN		ARID3A
NCBP2-AS2		PTP4A1		AC138409.2
ALOX12P2		SH3GLB1		BMPR1A
AC011247.2		FASTKD1		B3GNTL1
SOD2		SNORA84		COA1
PRDX3		MED1		PHF2
AC079305.1		RPSA		BTBD7
AC022540.1		ATF5		C22orf34
ARHGAP15		COX7B		CRTC1
MIER2		FZD1		ST7L
SNRPGP18		PAIP2		AC090796.1
KDM3A		AL096677.1		AC013437.1
NDUFB9		RPL5		TRIM71
DENND1A		SLC1A5		SLC38A1
MAPRE1		COX7A2		HNRNPA1
ASXL2		SLC35D1		AC021237.1
SMYD3		TSTD2		CAPRIN1
FNDC3A		CASC9		PIWIL4
ADGRE5		HGSNAT		MIR3155A
SMAD5		MYNN		TAF11
RPL39		SNORD50B		AGPS
TTC28-AS1_1		AC044849.2		IGF2R
MAP2K3		PPM1A		PPTC7
LAMP5-AS1		E4F1		METAP1
USP45		PANK1		AXIN1
IQGAP1		RAB32		ATG4B
CMPK1		GALK2		LAMC1
RAD9B		ZNF627		PITPNM2
DGCR8		RPS3A		KIAA0930
DHX36		DNAJC15		USP47
ELP2				DENND4A
CCDC18				POLR3C
SRGAP2				APP
ACY1				ERH
RAD17				PTPRC
TMX3				PTPN9
SPIDR				FTH1P25
EPS8				HNRNPM
PPP1R15A				REXO1
AP002364.1				AC118555.1
TPI1P2				CUX1
NAA15				BPTF
AC108002.1				RBPMSLP
SCYL2				UBASH3B
SNHG17				GCNT1
UBE2H				MIR5690
BSG				AC007448.2
AL158801.2				MARCHF6
CHERP				SCAP
MNT				ANP32A
TIFA				AL133467.1
XBP1				WDR20
CALM2				EIF4E
EEF2K				PPFIBP1
XKR6				POLR1D
AFF3				AC011676.3
DDX17				LINC00623
AC134669.2				RABEP1
FBXO15				ZDHHC17
EXOSC5				NF1
LSM4				IL6R
ADNP2				ZNF654
ZMPSTE24				NR2F1-AS1
AL512631.2				XPO6
AL157911.1				SF3B3
ARNT				C8orf44-SGK3
SLIRP				MRPL42
MSANTD4				FGD4
FBXW7				AGAP1
AL121809.1				PIAS2
CLEC11A				STAT3
TMEM259				DLX6-AS1
ACADSB				SNX10
F3				TBC1D12
RWDD4				MOB1B
C15orf39				FAM60BP
KCNIP2-AS1				ARAP1
VAMP8				ERVFRD-1
TXNL4B				AGPAT3
DENND6A-DT				AC008667.1
ZCCHC7				SF3A2
GOLT1B				BMP2K
TMEM258				PREX1
AL590787.1				AP000721.2
NUCKS1				snoU13
PRKAA1				ONECUT2
GPCPD1				UBAP2
ITM2B				ERLIN1
EPN1				SOCS5
OXNAD1				AC092139.3
ARHGEF7				AC025569.1
STIP1				FAM168B
SLC39A9				PTPN1
VPS52				RALBP1
AC105020.3				FAM126B
CU634019.6				MAML1
SSR3				RAB27A
ATAD3B				UHRF1BP1L
HACD3				ZBTB40
RALA				SPTBN1
AC087164.1				HRH2
COIL				AC004453.1
XRCC5				WDR4
AKAP11				CTSC
TMEM179B				AC026691.1
RFX3				CMSS1
CCT6P1				MAD1L1
TEX10				TACC3
PNPT1				IP6K1
FBXW2				AL391863.2
SETD3				CRTC3-AS1
FAM126A				AC110769.2
VPS37A				THSD7A
AC000081.1				DDX42
AKIRIN2				PRR11
YY1AP1				CSNK1G2
LRRC8C-DT				PAK4
RPL11P4				AL589655.1
PCIF1				GOLGA4
ASPH				PHACTR4
CNIH1				TNFRSF10B
CLPX				AC125603.1
NACA				HMBOX1
RNF2				PICALM
NCOA4				DNAJC3-AS1
PLEKHA3				EXOSC7
RNU6-135P				AC064847.1
SLC16A3				AC104451.1
TM9SF2				ZBTB8OS
TOGARAM1				WDFY3
DHX33				CSNK2A1
DIDO1				RC3H1-IT1
NUDT6				P2RY8
TRA2B				TAPT1
C17orf80				TBC1D8
GTF2E2				ZNF341-AS1
ADGRF3				VOPP1
COA7				TBC1D1
CALCOCO2				LATS1
UBE2D3				LYPLA1
AL137779.2				RNA5SP437
POLR3G				ZC3H12C
PPIG				DTL
AC092755.2				CD44
MGAT1				RAB40C
AC139530.2				CYFIP1
JMJD1C-AS1				GAPVD1
TFG				RET
AC083798.2				AC009299.2
ABRAXAS2				BICD2
TNRC18				HSH2D
TPT1-AS1				ZC3H11A
LRIG2				CCNT2
ZC3H8				MRPS27
PLA2G2C				ANXA11
SPART-AS1				RAP1GAP2
CD46				ARID4A
AL359711.2				SND1
SMNDC1				PARVB
CXorf21				SLC25A37
ZNF580				AC032044.1
TRGV9				ZNF680
LPXN				PHACTR3
PABPC1P1				AL157756.1
ABCB10				R3HDM2
CNOT7				SNX5
PSMA5				PTPRA
MIR4263				LRRC8B
TXN				DENND5B
SLK				SRSF9
TRAM1				MIR3680-1
DDX19B				SPAG9
FARSB				AC069431.1
SMARCD2				SLC3A2
AP2B1				AL021453.1
ACTL6A				AL355483.1
PIGX				TMEM161B-AS1
TSEN2				USP48
AC007613.1				AL121983.2
TRPM2				AC104984.6
FAM92A				DGKD
DCAF5				CNOT6
STK11				AC084018.2
FZR1				SLX4IP
THAP5				MBD5
MRPL58				MIER1
ADAM10				SNORA67
CFAP52				PIGN
GALNT1				LYRM4
ATP6V0D1				VAV2
LBR				AL133343.1
EXOC3				AL162430.2
GOLGA8M				NAA50
TYW5				EIF5B
COG5				NDST1
REXO4				FABP5P15
DIS3				TRUB1
POLR3H				RBM6
RAD51AP1				LINC00863
MEX3C				MPRIP
KHSRP				ITSN2
LDLRAD4				AL354928.1
MGST2				MIR941-4
PHF6				TMEM175
ZKSCAN8				WDR37
ZXDC				YARS
TOPBP1				KDM1A
GTDC1				SSH2
MIR3146				PTPRN2
IFT74				RAB20
AC008894.3				RDX
ERICH1				MIR103A2
OVCH1-AS1				USP22
ATXN3				CERS6
STX6				MEF2A
DCUN1D1				TSNAXIP1
AL713998.1				GOLGA8A
MINOS1-NBL1				AC096649.1
PSMB1				EP400
ME2				CSNK1G3
ERF				CARM1
RPL9				PPP1R12B
ARPC2				RB1CC1
KIF5B				TP53BP2
TRIM24				NRF1
AL139274.2				USPL1
CYTOR				ZC3HAV1
TBRG1				ATP5G2P3
ZNF787				SPECC1L
DBNL				PTER
CHI3L2				SMG1
GPHN				ULK4P2
NUDCD3				IPO7
PPM1G				SLC7A5
CENPU				AC132216.1
RPS6KA3				AC091057.1
SLC17A9				ANAPC10
COA6				ADD1
ZSCAN31				AC092139.2
RNU6-431P				METTL8
IL17RA				DESI2
RUVBL2				METTL16
LRRC34				AC090970.1
ADGRA2				JADE1
POMP				AC005229.4
MDFIC				RMND5A
SNRPN				C1GALT1
AC006449.2				AKAP9
OMD				AC007391.1
TMEM87B				TMEM30A
GRK2				SKAP2
AL731577.2				C1orf35
CD4				AC022726.1
ATP5C1				DNAJC2
SPRY2				IRS2
C1QBP				AC246817.1
OXSR1				SNORD92
TRAF2				SUGP2
RNF10				YTHDF2
CTDSP2				PRPF4B
LINC01128				AC091132.3
SNHG16				UIMC1
C9orf163				MRRF
INO80				FRMD4B
KIF18B				RPF2
IGFBP2				SERP1
IRF8				PPP2R5C
LRRC27				VPS37B
TXNRD2				MICAL3
VWA8				GON4L
RELT				SIRPA
SRBD1				FOXO3
AC087241.4				AC016542.3
FAM20B				AL157400.2
ARFIP1				AC243773.3
NDUFAF6				LCLAT1
PMM2				PRKY
R3HDM1				LPCAT1
LIMD1-AS1				SESN1
MAT2B				VPS37C
Z95331.1				NFIX
AL442663.2				MED13
PRPS1				PRR14L
ARID3B				AP2A2
UBL3				MIR4714
ZNF121				CEP44
NCOA5				TGFBRAP1
TOMM6				DOCK8
HERC2P9				AC022384.1
PRR12				RNF34
PLEK				SH3BP2
AL355353.1				CKAP5
TMEM64				C1orf43
NOD1				ANKMY1
FILIP1L				LITAF
RNASEL				B4GALT1-AS1
Z98749.2				BIRC6-AS1
MOCS3				ILF3
NDUFA5P2				IPMK
SUCLA2				AC006028.1
WDR92				RHEB
CDC73				NKD2
ING1				CACUL1
AC107871.2				NFIA-AS1
AC009303.4				CCNK
HELLS				PTPN11
RNGTT				HAT1
AC005520.2				SNX8
ARID4B				MIR648
GTF2H2C				TNRC6A
CARNMT1				TMX2
TTC17				NUP50-AS1
ATP5F1				AL357033.2
DCUN1D5				RARA
NT5DC3				EXOC5
CHMP7				BBX
XPOT				PPP6C
CCNH				EML4
AC019129.2				SCARNA20
DDI2				DGCR2
HELQ				GABPB1
TCFL5				AL391335.1
ARHGAP25				ELAVL1
UBE2V1				TSC22D2
KPNA5				AC000123.3
DEGS1				COL4A3BP
PDAP1				ARHGAP19
SVIL-AS1				TRIO
TRAPPC2				CDCA7L
ZNF189				PIGW
RASAL2-AS1				UHRF1BP1
U3				AC009630.1
AP4B1				AC244153.1
AC009053.2				AGFG1
NUPL2				SNORA72
TRAPPC4				APPBP2
AL390961.1				AP002770.1
NDC80				AC006504.5
STXBP4				G2E3
PGAM5				EPS15L1
UBE4A				FOXP4
VHL				SENP5
ANKMY2				HMG20A
CA5BP1				CLN6
AC008906.2				ITPK1
SASH3				POLR2B
AC004678.1				SLED1
CEP85				CAPZA2
PRPF39				MDN1
RABL3				LMBRD2
CAB39L				CTDP1
C5orf22				MAPKAPK5-AS1
SMARCA5-AS1				ZNF280D
AL162311.3				SSU72
AC016586.1				R3HCC1L
INTS11				DPY19L2P3
RN7SL800P				ARHGEF6
ITGAL				LINC01759
RPN1				PIPOX
ARHGEF1				CHCHD7
HPS3				MDM2
SLC39A3				CDK19
LNPEP				MACF1
SFMBT2				AMOTL1
TACC1				LMBR1
EMC1				AC096861.1
IDH3A				PTP4A2
CCDC47				DCLRE1A
MID1IP1				KDM4B
AC093835.1				RPL12P49
CDC40				ATM
ARFGAP2				NAA25
MIB1				ZRANB3
AC009226.1				MCM4
EMC7				PQLC1
FAM239B				JPX
CORO7				TFCP2
DICER1-AS1				NCOA2
REEP3				AL355001.2
EIF1AD				CDK12
DGUOK				PHF20
HIKESHI				LINC02062
ETFA				FBXL20
LAT2				ZNF236
NECAP1				TP73
RNF219				CLOCK
CEP78				MIR6866
HKR1				IZUMO4
SELENOT				IPO11
PUS7				AKAP1
YME1L1				NIPA2
SENCR				PCID2
MLEC				SNORA25
TMEM97				LAPTM4B
MYLIP				AL136172.1
C5orf34				CHKA
RPL34-AS1				PDE4A
SNHG3				TMEM267
CLEC2D				AKT2
TMUB2				FLRT1
CDC37L1-AS1				TMEM87A
EEF1E1				VCL
KLHDC3				RNF121
PIM1				RBM10
METTL3				USP13
PIEZO1				RPS15AP6
HNRNPF				DGKZ
FIP1L1				MAPK8
PCM1				GNAI3
UQCR11				ELF4
AC018553.2				RAC1
CRELD2				TBC1D22A
SFSWAP				LSM12
AC008038.1				PI4KAP1
MRPL21				VAV1
AC027237.3				AC245100.2
AP003721.3				NEIL3
RBL2				IDE
HNRNPMP1				CREB1
ABCE1				AK3P5
FUS				PPHLN1
OXSM				AC018878.1
RPSAP16				AP003108.2
AC018845.3				PXT1
WEE1				HPCAL1
GCA				PI4KA
CRBN				TBP
LASP1				AC007383.2
SLC2A5				UBE2G2
AC112907.3				SIMC1
FAM204A				PI4KAP2
IRX5				RBM15-AS1
RNF44				AC016831.1
SSBP4				AC069503.1
BLOC1S6				RNU6-1283P
PCNA				Z84478.1
SIPA1				TMEM11
STAG3L5P				PTGES3
CFLAR				DUTP1
GLA				PIP5K1A
TMEM161B				UBE2D1
AC026150.1				LINC00909
AVL9				AL121952.1
CXCR4				CAMKK2
ENO1				AP3D1
NME6				AC009831.1
MARS2				CSNK1D
DPM3				AC010522.1
NADK2				YAF2
OPA1				SPECC1
AL596094.1				NDUFA12
FBXO41				BTAF1
RNA5SP159				SIK3
ZBTB24				PANX1
COQ10B				MIR3176
RGS17P1				MIR181A2HG
SLC45A4				AL512604.1
AC002091.2				KIAA1551
SIK1				ARL16
GTF3A				PRCC
ZC3H13				P2RY2
PSMD10P1				ZNF565
SFT2D1				TCF3
NDRG1				ANKLE2
AHCY				FKBP15
VWA8-AS1				MCTP1
ZNF706				ITPRIP
SLC25A33				UBE2E3
RBM17				C1orf131
SLC25A38				IGF2BP1
GNG10				KMT5B
PLAU				CYTH1
EMSY				CMC2
ANKRD10				STARD7
ATL3				EIF4B
CNTRL				ZNF718
NOL10				NFKB1
CU633904.1				SMS
DNAJC5				ANKFY1
TMEM260				C3orf80
WDSUB1				RN7SL288P
C1orf216				LRP5L
MTBP				PRR4
POLR3E				LRIG1
SCFD1				ZNF567
TRIM44				ATP9B
RSL1D1				SEMA4D
INPP5B				AL117332.1
PURG				MGRN1
ZNF394				GFI1
DMTF1				DCAKD
STK17B				GPN3
FCHSD2				RPSAP6
LNP1				KATNBL1
SPI1				GPBP1L1
AC124242.1				LINC00476
NTSR1				ELMSAN1
TP53				MGEA5
CCNL2				SOS2
NOP56				MIR4673
RFXAP				AC016065.1
AC024592.3				MANEA-AS1
YTHDF1				TRAP1
COX6C				ANKRD27
PPARD				RPLP0
AC019080.1				ATP1B3
ACLY				FAM45A
EEF1D				DENND4C
DDX3X				TRPM7
USP34				RSU1
MED4				AKAP2
ARHGAP45				SETD7
CNTLN				CBL
RFC3				PSMB7
RPS6				SLC15A4
SIRT2				SOBP
NDUFB1				FAF2
SYNRG				SLC35F2
AC096536.1				PCGF3
CRYZ				ATXN7
KMT2E-AS1				CYCSP10
KRAS				AC114760.2
PTPN6				SEC11A
AL133368.1				SEM1
SIRPB2				ADPGK
UBALD2				AEBP2
LRIF1				SNX18
AL355490.1				DCTN4
AP000229.1				AC119396.1
LINC01004				PCBP2
CCT6A				LINS1
PFKM				ZBTB7A
CWC22				AC010654.1
RHOBTB2				AL359232.1
DUX4				RANBP6
TMEM70				AMBRA1
N4BP2L2				RBM25
ACTR5				TRMT1
FADS1				TMCO1
MAP3K14				ZFP36
USP11				TMEM120B
MARCHIF6				DHRS7B
CEPT1				TM9SF4
SUPT7L				UBAC2
BCR				AC012555.1
MAPK9				SGSM3
PARVG				STAM2
UQCRC2				DGKH
VDAC1				TRAF3
PECAM1				FGFR1OP
AC108738.1				MARS
VPS13C				TMBIM4
LIN7B				MFSD14A
RNF170
SMIM15
ANKRD46
ABHD12
AL391839.2
TMEM165
ZBTB6
CATSPER2P1
CU633967.1
HMGCR
TUBB
BRD8
SSR4
TAF5
EXOC1
AL121772.2
PEX2
ETS2
ZNF84
TYK2
ORC2
DECR1
COPS3
MTMR10
ADD2
AC034105.3
MAPKAPK3
INO80D
AC087190.2
HDAC1
LENG1
PBK
AC116351.1
TNFAIP3
SNRPB
CU638689.5
AL451074.1
AC099340.1
GABPA
HIST2H2AA4
AC069213.1
DNAJC1
PRRC1
ZNF511
RN7SL809P
TRIM14
ANKRD18DP
RIDA
CCNJ
SKIV2L2
SPCS1
AL022328.4
SMAP1
TFPT
ZSWIM3
AL353759.1
CSTF3
DMXL2
RSL24D1
BAG3
MUT
RAB6A
ZDHHC6
SLC6A6
USMG5
ACAT1
AMPD2
APEX1
CARS2
PFDN1
GPAT4
ZWILCH
EFTUD2
EMILIN2
KIAA1143
BCL2L13
LSM8
ERMARD
PUS3
CDK7
PCF11
TIMM9P1
TIPARP-AS1
AEN
DNAJC21
AF064858.1
MPHOSPH8
U73169.1
ATP1A1
EP400NL
MAP4K3
TVP23B
ENOSF1
NUP188
TRIM16L
AC087294.1
KMT2C
NUS1
HIPK1
SUZ12P1
ARFGEF1
AC011462.1
COX7A2L
ARHGDIB
EIF2B4
HNMT
MS4A4E
SARS2
FAM76B
MYPOP
TAF4B
AC025181.2
AP001412.1
CCPG1
U2AF1
MND1
CENPK
OXR1
STARD8
FRY
VPS11
YWHAH
AC007163.1
CSE1L
SMN1
U4
MIR4738
ZRANB2-AS2
AC015849.2
AC103760.1
FBXO24
LAT
MAEA
STRN3
MIS18BP1
B4GALT4
YIPF2
ALKBH8
DYM
ITGA4
LINC00235
RNASET2
CARF
MICB
RN7SL577P
MCUR1
MKRN2OS
SSFA2
GAPDHP60
RPL8
TPD52L2
ZBTB26
PDE12
RCC1
RFC1
PPFIA4
PPAT
ERCC1
KLHL2
TOMM5
ZYX
RASA2
ARHGAP4
TMEM116
MIR4435-2HG
HSPH1
IPO5
SPART
IER3IP1
NAPSA
PIKFYVE
HMGXB3
AGO4
VLDLR-AS1
ATP10A
TTLL12
MKRN2
RNF216
SNRPG
NMT1
AL358794.1
GLRX5
NEMF
EIF5
P2RX1
AL137856.1
DBP
MTSS1L
RPL30
RMI1
SEL1L
RABGAP1
PDHX
KLHL21
AL353662.1
ENDOV
ATAD1
CLPB
GGA3
SENP2
ZNF473
SART3
LEPROT
MAU2
AC063952.1
GGNBP2
AC046143.1
SDR39U1
BTF3
EBAG9
HPS4
VPS54
ACOT13

## Sheet: Common top 5%
ARID1B
FAF1
MBNL1
RREB1
SPRTN
NRIP1
PTEN
LYST
BRD4
GRB2
DLEU1
HIPK3
CDC42SE2
RALY
PUM1
MEMO1
SLMAP
PTK2B
SH3KBP1
YY1
GPBP1
ADCY9
UBE2K
FNIP1
HNRNPC
PUM2
RAF1
NCK2
UBR5
PHF3
APLP2
FOXN2
NFYC
FAM49B
SRSF11
RAP1B
ZNF644
CRKL
DNAJB1
PGS1
XPO1
REPS1
CDC42
TBC1D15
MEF2D
GIGYF2
KDM2B
MATR3
NT5C3A
FOXJ3
PTBP2
SMAP2
UBE3C
U2AF2
HECTD1
RSBN1
ARHGEF2
HNRNPR
LCORL
UPF2
VPS13B
FBXO5
ARHGAP11A
RFX7
FUBP1
BCLAF1
CGAS
SYNCRIP
B3GNT2
AP3B1
VAPA
MORF4L1
NUFIP2
C9orf147
EWSR1
YWHAZ
NASP
CPSF6
PREP
NSMAF
